# Supplementary material for: Mol‐BERT: An Effective Molecular Representation with BERT for Molecular Property Prediction
Source: Hindawi journal article supplement (doi:10.1155/2021/7181815), 2021-01-01
Supplement: f1 [file 7181815.f1.txt]

COc1ccc(NC(=O)CCCn2nnc3ccccc3c2=O)c(OC)c1
CCCS(=O)(=O)[C@@H](C)C(=O)NCC(C)(C)c1ccccc1F
C[C@@H]1C2[C@H]3Cc4ccc(O)c5c4[C@@]2(CCN3CC2CCC2)[C@@H](O5)C(=O)C1(C)C
CCc1cc(C(C)(C)C)ccc1C(C)NC(=O)Nc1cccc2cnccc12
c1ccc(Cn2nnc3cnccc32)cc1
CC(=O)NC[C@@]1(c2ccccc2)CC[C@@H]2O[C@H](c3ccccc3)C[C@H](O)[C@H]2CC1
CN1CCN(C(=O)C(CN)(Cc2ccc3ccccc3c2)Cc2ccc3ccccc3c2)CC1
COc1cc(OC)c2c(c1)C(=O)c1cc(C(Br)Br)cc(OC)c1C2=O
O=C(CNCC1CCCO1)NCc1ccco1
C[C@H](O)C(=O)N1CCN(C(=O)CCc2ccc3ccccc3c2)CC1
Nc1nc(N2CCSCC2)c2cc[nH]c2n1
O=C(CC12CC3CC(CC(C3)C1)C2)N1CCN(c2cc(=O)[nH]c(=O)n2Cc2ccc(OS(=O)(=O)c3cccc4cnccc34)cc2)CC1
Cc1ccc(N2CCN(Cc3cc(=O)[nH]c(N4CCN(C(=O)CC(C)(C)C)CC4)n3)CC2)cc1
CC(C)c1noc([C@H]2CCCN(C(=O)Cn3cnnn3)C2)n1
CN(C)CCOC(=O)N1CCC(=C2c3ccccc3CCc3cccnc32)CC1
O=C(O)[C@@H]1CCCN(CCCSC(c2ccccc2)c2ccccc2)C1
O=C1C[C@@H](c2nc(-c3ccccc3F)no2)CN1c1ccc(F)cc1
O=C(O)c1cccc(-c2ccc(/C=C3/SC(=O)N(Cc4cccc(Br)c4)C3=O)o2)c1
Cc1ccc(C2(C(=O)N3C[C@H](CO)[C@H](CN4CCCCCC4)C3)CC2)cc1
O=C(COc1ccc(Cl)cc1Cl)Nc1onc2c1CCC2
COc1ccc(Cl)cc1NC(=O)Cn1c(=O)n(CCC(=O)NCc2ccc3c(c2)OCO3)c(=O)c2ccccc21
O=[N+]([O-])c1ccc(/C(=N/Nc2nc(-c3ccc([N+](=O)[O-])cc3)cs2)c2ccccc2)cc1
C[C@@]12CCC[C@@](C)(C(=O)O)[C@H]1C[C@H](O)[C@@]13C[C@@H](CC[C@@H]21)[C@@](O)(CO)C3
CCC[C@H](C)c1nc(N2CCCN(C(=O)C3CCC3)CC2)c2c(C)nn(-c3ccc(F)cc3)c2n1
OC(Cn1cnnn1)(c1ccc(F)cc1F)C(F)(F)c1ccc(C#Cc2ccc(F)cc2)cn1
CCCC(C(=O)NC1CCCC1)N(CC1CCCO1)C(=O)CNS(=O)(=O)c1ccccc1
O=c1c2c([nH]n1-c1ccc([N+](=O)[O-])cc1[N+](=O)[O-])C=C(c1ccc(F)cc1)CC2c1ccccc1
COc1cccc(CN(C)CCC(=O)Nc2sc3c(c2C#N)CCCCC3)c1
CC/N=C(/Cc1ccc2cc(C)ccc2c1)NCC
CCc1cc(=O)n(CC(=O)Nc2cccc(C)c2C)c(N)n1
O=C(NC1CCCCC1)[C@H](c1ccccc1)N(Cc1ccccc1)Cc1ccccc1
O=C1NCc2cccc(N[C@@H]3CCN(c4ccc(C(F)(F)F)cc4)C3=O)c21
COC(=O)[C@@](C)(O)c1ccccc1
CN(C)/C=C1\C(=O)N(c2cccc(Cl)c2)c2ccccc21
NC(=O)c1ccccc1NC(=O)c1cc(Cl)cc(Cl)c1
CCOC(=O)C1=NN(c2ccccc2Cl)[C@H]2C(=O)N(c3ccc(Br)cc3)C(=O)[C@H]12
CC[C@@H](C)c1ccc(OCC(=O)N2CCN(c3ccc(C(F)(F)F)cc3[N+](=O)[O-])CC2)cc1
CSc1nnc(Cn2nc(-c3ccc(C)cc3)n(N)c2=O)n1-c1ccccc1
COCCN(C/C=C/c1ccccc1)C(=O)N[C@@H](C)c1cnn(C)c1
C[C@@H]1O[C@H](C)CN2c3c(cc4c(N5C(=O)OC[C@H]5c5ncccn5)noc4c3F)CC3(C(=O)NC(=O)NC3=O)C12
CCCC[C@H](NC(=O)[C@@H](C)NC(=O)OCc1ccccc1)C(N)=O
COc1ccc2c(c1)CCC(C(=O)c1ccc(OC)c3c1OCO3)C2
COc1ccc(COCCSc2nc(C(C)c3c(F)cccc3F)c(C)c(=O)[nH]2)cc1
COC(C)(C)C(=O)N1CC[C@@H](c2c(C(=O)NCCO)sc3ncccc23)C1
COc1ccc(N(CC(=O)Nc2ccc(C(F)(F)F)cc2)S(=O)(=O)c2cccs2)cc1
C[C@H](SCC(=O)NCCC1=CCCCC1)c1nc(N)nc(Nc2ccccc2)n1
Cc1ccc(C(CCCN)(c2ccccc2)c2cccc(O)c2)cc1
Cc1[nH]cnc1C(=O)N/N=C/c1c(Cl)cccc1Cl
C=CCNc1nc(C(=O)OCC(=O)Nc2nc(-c3cccc([N+](=O)[O-])c3)cs2)cs1
C[C@@H]1CN(CC(=O)Nc2cc(Cl)ccc2F)C[C@@H](C)O1
CCN(Cc1ccc(O)cc1)C(=O)c1nc(-c2ccccc2)c2ccccc2n1
COc1cc(N2C(=S)N[C@H](c3ccccn3)[C@H]2c2ccn(C3CCCC3)c2)ccc1NS(C)(=O)=O
Cc1csc(CNC(=O)c2cccnc2Sc2ccc(C)c(C)c2)n1
CCNC(=O)[C@]1(C)CC(c2cnc(NCC)nc2)=NO1
COc1ccc(C(=O)O)cc1S(=O)(=O)N(C)C
O=C1CO[C@H](COc2ccc(F)cc2)CN1C1CCN(CCn2cc[nH]c2=O)CC1
Cc1nnc(SCC(=O)NC(=O)NCCC(C)C)n1C
CC(C)[C@H](NC(=O)c1ccco1)C(=O)Nc1ccc(OC(F)F)cc1
CCOC(=O)c1c(-c2cccc(OCC)c2)[nH]c2cc(OC)ccc2c1=O
Cc1cc(CSc2nnc(CN3CCCC3)n2Cc2ccccc2)no1
Cc1ccc(N2C(=O)CC(Sc3ncccn3)C2=O)cc1C
Cc1cccc2nc(N3CC[C@](O)(CN(C)C)C3)oc12
COC(=O)COc1ccc(OCCNCC(O)COc2ccc(O)cc2)cc1
O=[N+]([O-])c1ccc(/C=C/[C@@H]2CCCCN2)cc1
CCOc1ccc(C(=O)NCC(=O)N2CC=C(c3ccccc3)CC2)cc1OCC
Cc1cccc(-n2c(C)nc3cc(C(=O)NCC4CCCO4)ccc32)c1
CCOC(=O)C1=C(N)Oc2[nH]nc(C)c2C1c1cc(=O)oc2cc(C)ccc12
CCCCCCn1c(=O)c2c(nc3n2C[C@H](C)CN3c2ccc(C)c(C)c2)n(C)c1=O
O=C1C(Cl)=C(Nc2ccc(F)cc2)C(=O)N1c1cccc(Cl)c1Cl
C[C@@H]1C[C@@H](C)CN(c2ccc(S(=O)(=O)N3CCN(C)CC3)cn2)C1
CC(C)CCC[C@H](C)[C@@H]1CC[C@@H]2[C@@H]3C[C@@H]4O[C@@]45CCCC[C@]5(C)[C@H]3CC[C@]12C
C=C(C)[C@H]1CC[C@@](C)(O)[C@H]2CC[C@](C)(O)[C@H]2C1
Nc1c(C(=O)Nc2ccc(Br)cc2)sc2nc3c(cc12)C(=O)CCC3
COCCn1ccc2c(OCC(=O)c3ccc(Cl)cc3)cccc2c1=O
CN(C)CCCC(C)(O)C(C)(C)c1ccccc1
C[C@H](O)CN1CCC(CN[C@@H](C)c2cccc(Cl)c2)CC1
CN(C)Cc1cccc(-c2cccnc2C(=O)NCC2CC2)c1
CC[C@H](C)NC(=O)[C@H](Cc1ccccc1)N(Cc1ccccc1)C(=O)CN(c1ccc(C)cc1C)S(C)(=O)=O
COCCC[C@@H]1CCCCN1C(=O)c1ccc(S(N)(=O)=O)cc1
CC(C)c1ccc(C2=NN(c3ccccc3)C(=O)CC2)cc1
Cc1ccccc1NC(=O)c1cccnc1Nc1cccc(Cl)c1
CCCCCCCCn1cc(CN2CCCC2)c2cc(-c3cccc(C)c3)ccc21
C[n+]1ccc(-c2c3nc(c(-c4cccc(C(=O)O)c4)c4ccc([nH]4)c(-c4cc[n+](C)cc4)c4nc(c(-c5cccc(C(=O)O)c5)c5ccc2[nH]5)C=C4)C=C3)cc1
c1ccc2oc(CN3CCCC(Cn4cncn4)C3)nc2c1
O=C(O)/C(O)=C/C(=O)c1c[nH]c2ccc(Cl)cc12
CN1CC(=O)N(CCCC(=O)NCC2(c3ccccc3)CC2)C1=O
S=c1[nH]nc(-c2cccc(Cl)c2)n1-c1ccccc1Br
O=C(N/N=C/c1cc(O)c(O)c(O)c1)c1cc(O)c(O)c(O)c1
CNCC1CCN(c2ccc(Cl)cc2NC(=O)c2csc3cncnc23)CC1
Cc1ccc(-n2cc3c(N4CCC[C@H](C(=O)N[C@@H](C)c5ccc(C)cc5C)C4)ncnc3n2)cc1
CC(C)Oc1cccc(C2C3=C(COC3=O)Nc3cc4c(cc32)OCO4)c1
C[C@H](CCNC(=O)N(C)Cc1ccc2nsnc2c1)N1CCN(C)CC1
COc1ccc(N2CCN(C(=O)CC[C@H]3NC(=O)c4ccccc4NC3=O)CC2)cc1
NCc1ccc(C(=O)Nc2ccncc2F)cc1-c1cccc(C(=O)OCC2CCCCO2)c1
COc1cc(/C=C/C(=O)O[C@@H]2[C@@H](O)[C@H](O)[C@@H](CO)O[C@H]2OC[C@H]2O[C@@H](Oc3cc4c(cc3O)C[C@@H](C(=O)O)N4C(=O)/C=C/c3ccc(O)cc3)[C@H](O)[C@@H](O)[C@@H]2O)ccc1O
CC(C)c1cc(C(=O)N2CC[C@H](C(=O)O)C2)nc(N)n1
Cc1cc(C(=O)NC2CCN(C(=O)c3cnccn3)CC2)c(C)s1
CCOc1ccc(S(=O)(=O)N[C@@H](C)C(=O)Nc2ccc(C(=O)OC)cc2)cc1Cl
C=CCO/N=C(\CCC)[C@@H]1C(=O)CC(C)(C)[C@@H](C(=O)OC)C1=O
CC(C)c1nc(CCN2CCCCO2)n(-c2ccccn2)n1
Cc1cccc(N2C[C@@](O)(c3cccc([N+](=O)[O-])c3)[N+]3=C2SCCC3)c1
Cc1cc(B(O)O)cnc1N1CCOCC1
COc1cc(C(C)C)c2c(c1)S(=O)(=O)N(COC(=O)c1c(Cl)ccc(OCC(=O)O)c1Cl)C2=O
CCOc1ccccc1CN1C(=O)c2ccccc2C1C(=O)NC(C)CC
CC[C@@H](N)c1ccc(OC)c(Br)c1
COc1ccc(N2C(=O)C(CCCc3ccccc3)C2(c2ccc(OC)cc2)c2ccc(OC)cc2)cc1
CN(c1cc(Oc2ccc(F)cc2Cl)ncn1)C1CCCCC1
COc1cc(-c2nc(C(=O)Nc3ccccc3F)cs2)ccc1OCc1ccc(F)cc1F
Cc1sc2nc(COC(=O)CNC(=O)c3ccc(C(C)(C)C)cc3)nc(O)c2c1C
Cc1cc2c(cc1C)/C(=N/NC(=O)c1ccccn1)CCC2
O=C(Nc1ccc(Cl)c(Cl)c1)c1ccccc1NC(=O)[C@H]1CCCC[C@@H]1C(=O)O
CCOC(=O)c1cccc(N2C(=O)Cn3cccc3[C@@H]2C(=O)N[C@@H]2CCCC[C@@H]2C)c1
CC1(C)CCC[C@@]2(C)C1=C[C@H]1C(=O)[C@H](c3ccc(Cl)c(Cl)c3)[C@H]12
CCOC(=O)c1ccc(CC(C)(C)C)nc1O
Cc1cccc(OCCC(=O)Nc2ccc(Cl)cc2F)c1
COc1cc2c(cc1Cl)CCNC2Cc1ccccc1
Cc1cc(Cl)cc(Cl)c1CC(=O)NC1COc2cncc(C)c21
CCOc1ccc(/C=C2/SC(=S)N(NC(=O)c3ccccc3)C2=O)cc1OCC
C[C@H](C(=O)N[C@H]1CCCC[C@@H]1c1ccccc1)S(C)(=O)=O
COc1ccc(-n2cc(-c3cnc(C(=O)NCC(=O)O)c(O)c3)nn2)cc1
COCCN1CC[C@@H](CNS(=O)(=O)c2cc(OC)c(C)cc2C)C1
COc1ccc(-c2ccc(C[C@H]3CN(C(=O)c4cc[nH]n4)CCN(C)C3=O)cc2)cc1
CC1(CSc2nc3ncccc3c(=O)n2C[C@H]2CCCO2)COC1
CC(C)(C)CNc1ncnc2ccc(-c3ccc4c(c3)OCO4)cc12
CC[C@@H](C(=O)NC)N(CCc1ccccc1)C(=O)CN(c1ccc(Cl)cc1)S(=O)(=O)c1ccc(OC)c(OC)c1
Cc1ccc(NC(=O)NC[C@H](C(C)C)N(C)C)cc1Cl
O=C(NNC(=O)C1[C@H]2CCCC[C@@H]12)NC1CCCCC1
COc1ccc(CCC(=O)Nc2ccc(C)cc2F)cc1OC
CC(=O)c1ccc(NC(=O)CCn2nnc(-c3cccc(F)c3)n2)cc1
CC(=O)OC[C@]12[C@H](CCC[C@]13CO3)[C@@]1(C[C@@H](c3ccoc3)O[C@@H]1O)[C@H](C)[C@@H](O)[C@@H]2O
CC#CCN1c2ccccc2[C@]23C[C@@H](C(=O)OC)N(C(=O)OCC)C2=NC(C(=O)OC)=C(C(=O)OC)[C@H]13
CCOC(=O)C[S@](=O)c1ccccc1
Cc1ccc(-n2nc(-c3ccccc3)c3c2N(CC(=O)NC2CC2)C(=O)CS[C@@H]3c2ccc(F)cc2F)cc1
COc1ccccc1-c1coc2c(CN3CCCC(C)C3)c(O)ccc2c1=O
CC(C)Oc1ccc(N2C[C@H](C(=O)N3CCCCC3)CC2=O)cc1
Cc1cccn2c(=O)cc(OCC(=O)NCc3ccc(F)cc3)nc12
CCc1nc2ccccc2c(=O)n1NC(=O)c1c(O)c2ccccc2n(CC)c1=O
CC[C@]1(c2ccccc2)NC(=O)N(CC(=O)N2CCC[C@@H]2c2ccc3c(c2)OCCCO3)C1=O
CSc1cccc(NC(=O)[C@@H](C)NC(=O)C(C)(C)C)c1
Cc1ncncc1C(=O)N1CCC[C@]2(CCC(=O)N(CCc3c[nH]cn3)C2)C1
CC(C)=CCC/C(C)=C/CC/C(C)=C/Cc1cn(CC(=O)O)nn1
COC(=O)/C=C(\C)OP(=O)(OC)OC
COc1cccc([C@H]2c3c(oc4cc(C)c(C)cc4c3=O)C(=O)N2c2ccc(C)cn2)c1
CC(=O)OC[C@H](Cc1ccccc1)NC(=O)[C@H](Cc1ccccc1)NC(=O)OC(C)(C)C
COc1cc2c(c3c1c(=O)c1ccccc1n3C)C[C@H]([C@](C)(O)CO)O2
O=S1(=O)C[C@@H](O)[C@@H](Nc2ccc3ccccc3c2)C1
O=C(CN1C(=O)S/C(=C/c2ccc(Br)cc2)C1=O)Nc1ccc(Br)cc1
O=C1CN(C(=O)c2ccncc2NC(=O)c2nc(C3CC3)ccc2Nc2cncnc2)CCN1
O=S(=O)(Nc1ccccc1)c1ccc(NCc2cccc(Cl)c2O)cc1
COc1ccc(NC(=O)CSc2nnc(C)n2-c2ccccc2)c(OC)c1
O=C(NCCC1=CCCCC1)[C@@H]1CCCN(c2cc(-n3cncn3)ncn2)C1
CC[C@H]1Oc2cc([C@H](C)NCc3cc(C)on3)ccc2NC1=O
O=C(Nc1n[nH]c2ccc([N+](=O)[O-])cc12)c1ccc(CS(=O)(=O)C(F)F)cc1
S=C1N[C@@H](c2ccccn2)[C@H](c2cccn2-c2ccncc2)N1C1CCCCC1
COC(=O)[C@@H]1C[C@@H](NC(=O)c2ccc(N3CC(=O)NC3=O)cc2)CN1C
CC[C@@H](C)NC(=O)[C@@H](C)N(Cc1ccc(Cl)cc1)C(=O)CN(c1ccc(F)cc1)S(C)(=O)=O
O=C(CN(c1cc(C(F)(F)F)ccc1Cl)S(=O)(=O)c1ccccc1)Nc1ccc(N2CCOCC2)cc1
COCCN1Cc2cccc(C(=O)Nc3nc4ccccc4[nH]3)c2C1=O
Cc1cc(NC(=O)Cn2cc(-c3ccc(Oc4ccccc4)cc3)nn2)no1
O=C(NC12CC3CC(CC(C3)C1)C2)N[C@H]1CC[C@@H](OCc2ccc(Br)cc2)CC1
CCCc1cc(N2CCN(CCOc3ccccc3)CC2)n2c(nc3ccccc32)c1C#N
Cc1ccc(N2C(=O)c3ccc(OC(=O)CCc4ccc(N)cc4)cc3C2=O)cc1
CCCn1c(=O)n(CCO)c(=O)c2[nH]cnc21
O=C(Cc1ccc(F)cc1)N1CCO[C@@H](COCc2c(Cl)cccc2Cl)C1
CCOC(=O)C(CC)Sc1nnc2[nH]c(=O)cc(C)n12
CC(=O)N1CCc2c(c(Nc3cccc(-c4cnoc4)c3)nn2CC2CC2)C1
COc1ccc(C2=NN3[C@@H](C2)c2cc(Br)ccc2O[C@@H]3c2ccsc2)cc1
O=C(N/N=C/c1ccc(O)cc1)c1cncc(Br)c1
O=C(/C=C/c1ccc(Cl)cc1)NCc1ccc(B(O)O)cc1
CN(C(=O)CN(Cc1ccc(Cl)cc1)S(=O)(=O)c1cccnc1)c1ccccc1
CN(Cc1nc2ccccc2n1C)S(=O)(=O)N1CCCC1
C[C@@H](NC(=O)c1cc([N+](=O)[O-])cc([N+](=O)[O-])c1)c1ccc(F)cc1
O=C(Nc1nc(-c2cc(F)ccc2F)cs1)c1nc(Cl)ccc1Cl
CCNC(=O)N1CCN(c2ccc(-c3noc(-c4cncc(Br)c4)n3)cc2)CC1
COC(=O)c1cccc(NC(=O)c2ccc(NS(=O)(=O)N(C)C)cc2)c1
Cc1cc(=S)[nH]cc1[C@H](O)c1ccccc1
O=C(N[C@H]1CCCN(c2ccccc2)C1)c1ccncc1C(F)(F)F
CN1C(=O)C(c2cccc(-c3cccnc3)c2)(c2ccc3c(c2)CCO3)N=C1N
O=C(Nc1nn2cc(-c3ccc(Cl)cc3)nc2s1)C1CCN(C(=O)/C=C/c2ccccc2)CC1
Cc1ccc(C(=O)N2CCc3c(CN4CCCC4)nn(C(C)C)c3C2)cc1
CC(C)N(C(=S)SC(=S)N(C(C)C)C(C)C)C(C)C
NS(=O)(=O)c1ccc(CCNC(=O)CSc2cccs2)cc1
CCCCc1n(Cc2ccc(-c3ccccc3-c3nn[nH]n3)cc2)c(CO)c[n+]1Cc1ccc(-c2ccccc2-c2nn[nH]n2)cc1
Cc1nc2sc3c(c2c2nnc(SCC(=O)N4CCC[C@H](C)C4)n12)CC[C@H](C)C3
OCCN1CCN(C2=Nc3ccccc3Nc3cscc32)CC1
CN(C)S(=O)(=O)c1ccc(Nc2ccc(C(=O)c3c(F)cccc3F)c(N)n2)cc1
CC(C)C1=C[C@@]23CC[C@H]4[C@](C)(C(=O)O)CCC[C@]4(C)[C@@H]2C[C@H]1[C@H]1C(=O)N(c2ccc(O)cc2)C(=O)[C@H]13
COc1ccc(C2CC(c3ccco3)=Nc3ccccc3S2)cc1
C[C@H](C(=O)NCc1ccc(OC[C@@H]2CCCO2)cc1)n1cccn1
C[C@H](Oc1ccccc1F)c1nnc(SCCC(=O)NC(=O)NCc2ccccc2)o1
CCc1nnc(NS(=O)(=O)c2ccc(NC(=O)c3cc(Cl)ccc3OC)cc2)s1
COc1ccc(N2C(C(C)=O)=NN(c3ccccc3)C2c2cccs2)cc1
O=C(O)CN(C(=O)c1ccccc1C(=O)O)C1CCCC1
Cc1ccc(S(=O)(=O)N2CCC(C(=O)Nc3ccc4c(c3)OCO4)CC2)c(C)c1
CN(Cc1nc(-c2cccs2)no1)C(=O)COc1ccc(Br)cc1Cl
C[C@H]1CCCC[C@H]2C(=O)C=C[C@H](O)[C@@H]2CC(=O)O1
Cc1cn2c(n1)CCC(NC(=O)c1cc(C3CC3)[nH]n1)C2
Cc1nc(CCNC(=O)COc2ccccc2C)cs1
O=C(O)C=C1CCCCCC1
CCOc1cc(/C=C2\SC(=O)N(CC(=O)Nc3ccccc3C)C2=O)ccc1Oc1ccc([N+](=O)[O-])cn1
Cc1c(C)c(Cl)c(O)c(CN)c1C
Cc1cc(NC(=O)NCCCO)ccc1Br
CC(=O)N[C@@H](C=O)[C@H](O)[C@@H](O)[C@H](O)CO
CC(C)n1cc(C(=O)c2cncc(NC(=O)Cc3cn4cccnc4n3)c2)c2cncnc21
CN(C)c1nc2n(c(=O)n1)CCS2
C[C@@H](NC(=O)CN1CCOC[C@H]1CC(=O)c1ccccc1)c1ccccc1Cl
COc1cn(-c2ccccc2)nc1C(=O)Nc1c(C)noc1C
CCOC(=O)N1CCN([C@H](c2cccnc2)c2cc(CC)sc2NC(=O)c2ccco2)CC1
Cc1c[nH]c(CN(C)Cc2cn(-c3ccccc3)nn2)n1
CN1CCN(CCCNC(=O)c2cnn(-c3ccc(F)cc3)c2-n2cccc2)CC1
COc1ccc(Nc2nc(NCCCO)nc(C)c2[N+](=O)[O-])cc1
CCOc1ccc(N(CC(=O)N2CCN(Cc3ccc4c(c3)OCO4)CC2)S(=O)(=O)c2ccc(C)cc2)cc1
COc1ccc(C2C(C(=O)c3ccco3)=C(O)C(=O)N2c2nnc(C)s2)cc1
Cc1c(C#N)c2ccccc2c2nc3ccccc3n12
CCN1/C(=C/c2ccc3cc(F)ccc3[n+]2CC)C=Cc2ccccc21
CCN1CCCC1CNC(=O)c1c(OC)c(Cl)cc(Br)c1OC
O=C(CCc1ccco1)Nc1nc(-c2ccccc2)cs1
Cc1n[nH]c(C)c1[C@H](C)C(=O)OCC(=O)NCc1ccco1
O=C(Cc1ccc(Cl)cc1)NCCCN1CCN(c2cccc(C(F)(F)F)c2)CC1
COCc1ccc(C(=O)N2CCCC[C@H]2c2nc(N(C)C)ncc2-c2ccncc2)cc1
CCOC(=O)C1=C(C)N=c2s/c(=C\c3ccc(OC(C)=O)cc3)c(=O)n2[C@@H]1c1ccccc1
O=C(C[N+]12CCC(CC1)C(C(O)(c1ccccc1)c1ccccc1)C2)c1ccc(Br)cc1
CCn1c(=O)/c(=C2\Sc3cc(OC)ccc3N2C)s/c1=C\c1cccc[n+]1CCCCCCNC(=O)CCCC[C@@H]1SC[C@@H]2NC(=O)N[C@H]12
OC1CCN(Cc2ccccc2C(F)(F)F)CC1
O=C(O)C[C@@H](NC(=O)[C@@H]1CCN1S(=O)(=O)c1cc(Cl)cc(Cl)c1)c1ccc(OCC(F)(F)F)cc1
COC(=O)Nc1nc2cc(C3(O)c4ccccc4C(=O)N3c3c(F)ccc(Br)c3F)ccc2[nH]1
N=C(N)NCCCC[C@H](NC(=O)c1sccc1NS(=O)(=O)c1ccc(N)cc1)C(=O)O
Nc1nc(O)c2nc(Br)n([C@H]3C[C@H](O)[C@@H](CO)O3)c2n1
Cc1cc(Br)ccc1N1C(=O)NC(=O)/C(=C/c2ccc(OCc3cccc(F)c3)c(Cl)c2)C1=O
CN(C)C(=O)N[C@H]1CC[C@H](CCN2CCN(c3ccccc3Cl)CC2)CC1
CCOc1ccc(-c2nnc(SCC(=O)NCCC(C)C)nc2-c2ccc(OCC)c(OC)c2)cc1OC
N=C(N)NC(=O)[C@H]1C[C@@H]1c1ccccc1
O=C(OCc1ccccc1)c1coc(-c2cnccn2)n1
N[C@@H](CC(=O)N1CCc2noc(C(F)(F)F)c2C1)Cc1cc(F)ccc1F
COc1cc(OC)c2nc(Cl)c(CCN3C(=O)c4ccccc4C3=O)cc2c1
CC(C)Cc1noc(C2CCCCN2C(=O)CCc2cnn(C)c2)n1
CNC(=O)c1cccc(C2CCN(c3ncc(C(O)(C(F)(F)F)C(F)(F)F)s3)CC2)c1
CCc1nc(N)nc(N)c1C#CCc1cc(-c2cccc(C(=O)O)c2)ccc1OC
COC(=O)c1cc(Cl)c(C(=O)OC)cc1Cl
Cc1cc(OS(=O)(=O)c2ccc([N+](=O)[O-])cc2)ccc1C(C)C
Cc1cc(C)c(C)c(OCc2nc(CN(C(=O)c3ccc(F)cc3)C3CC3)cs2)c1
Cn1cc(Cc2cn(CC(=O)N(CCN3CCCCC3)Cc3ccc(-c4ccc(C(F)(F)F)cc4)cc3)c(SCc3ccc(F)cc3)nc2=O)cn1
Cn1c(C(=O)N2CC[C@]3(CCCNC3=O)C2)cc2cccc(Cl)c21
Cc1cc(OC[C@@]2(CC(=O)N3CCCCC3)CN(C(=O)CN3CCN(C)CC3)CCO2)ccc1Cl
CCN(C)C(=O)N1CCN(C(=S)SCc2cn(Cc3cc(OC)c(OC)c(OC)c3)nn2)CC1
Cc1ccc([C@@H](NC(=O)[C@H]2CCCN(S(=O)(=O)c3ccc(C)cc3)C2)c2ccccc2)cc1
COC(=O)c1cc(Cn2cnc3ccc([N+](=O)[O-])cc3c2=O)oc1C
Oc1cnnc(N/N=C/C2CC=CCC2)n1
CCCCN(CC)C(=O)[C@@H]1CCCN(c2ccnc(-c3ccc(C)cc3)n2)C1
CC1Nc2ncnc(N3CCN(c4ccccc4)CC3)c2N(Cc2ccc(Br)cc2)C1=O
COc1ccccc1C(=O)Nc1ccc(C(=O)N2CCCCC2)cc1
CC[C@H]1NCCc2cc(O)c(O)cc21
COC(=O)c1ccc(CSc2nc(Cc3cc(C)cc(C)c3)cc(=O)[nH]2)cc1
CCCN(Cc1ccc(OCCN2C(=O)CCC2=O)c(Cl)c1)C(CC(=O)O)c1ccc(Cl)c(F)c1
C/C(COc1ccccc1)=N\N=C1/NC(=O)CS1
COc1ccccc1C(=O)Nc1ccc(Nc2cc(C)nc(N3CCCCC3)n2)cc1
Cc1c2c(=O)n(-c3ccccc3F)[nH]c2cc(=O)n1C
CCCC(C)N(c1cc(Cl)ccc1CO)S(=O)(=O)c1ccc(C(C)C)cc1
O=c1c2ccccc2nnn1CSc1nnc(COc2ccc(Cl)cc2)n1Cc1ccco1
O=C1COc2cc(S(=O)(=O)N3CCN(C(=O)c4ccc5c(c4)CCO5)CC3)c(Cl)cc2N1
COc1ccc(S(=O)(=O)N2CCNC(=O)CC2)cc1
Cc1n[nH]c(C)c1S(=O)(=O)N1CCN(C)[C@]2(CCNC(=O)CC2)C1
CC(=O)c1nn(-c2ccccc2)c(N)c1-c1nc2ccccc2s1
CCOc1ccccc1NC(=O)COc1ccc(/C=C2\SC(=O)N(c3cccc(Cl)c3)C2=O)cc1OC
C[C@H](CN)C[C@H](Cc1cn([C@H]2CC[C@H](C)CC2)cn1)C(=O)O
CCOc1ncccc1C(=O)Nc1ccccc1Nc1ccccc1
CC(=O)c1ccc(NC(=S)Nc2cccnc2Cl)cc1
Cc1ccc(S(=O)(=O)N2CCN(C(=O)CCC(=O)N3CCc4ccccc43)CC2)cc1
O=S1(=O)CCC[C@@H](O)C1
COCCC[C@]1(CO)CCCN(Cc2cncnc2)C1
Cc1ccc2oc(-c3ccc([N+](=O)[O-])cc3)nc2c1
CCOc1ccc(CN2C(=O)CCCC2c2c(OC)cccc2OC)cc1
CC1(C(=O)O)COC(c2ccc(Cl)cc2)OC1
O=C(NCc1ccc(F)c(F)c1)c1c(C2CCCC2)n(Cc2ccccn2)c2ccc(O)cc12
Cc1cc(C(=O)COC(=O)c2cccc(S(=O)(=O)N3CCN(c4ccccc4)CC3)c2)c(C)n1-c1ccccc1
C=C1CC[C@H]2[C@@](C)(CCC[C@@]2(C)C(=O)O)[C@@H]1CC[C@@H](C)CCO
COC(=O)[C@]1(C)CN(C(=O)N[C@H](C)c2nnc3n2CCCC3)C[C@H]1C
CN1CCN(C(=O)CCl)CC1
O=C(O)CNCCNC(=O)[C@H](Cc1ccccc1)NC(=O)CNC(=O)CCc1ccc(O)cc1
CN(C)C1CC1c1cccc(O)c1
Cc1ccccc1-n1c(CF)nc2cccc(Cl)c2c1=O
COc1ccc(/C(=C(/CCNC(=O)NCc2ccccc2)c2ccccc2)c2ccccc2)cc1
CC(C)N[C@@H](NC(=O)Cc1ccccc1)C(Cl)(Cl)Cl
Cc1cc(S(=O)(=O)NCc2ccc3c(c2)OCO3)c(C)cc1Cl
COc1ccc(S(=O)(=O)N(Cc2ccc3c(c2)OCO3)[C@H](CCC(=O)NCc2ccncc2)C(=O)NO)cc1
Nc1ccn([C@H]2C[C@H](O)[C@@H](OCP(=O)(O)O)C2)c(=O)n1
Cc1noc(-c2ccccc2OCC(=O)NC(C)(C)C)n1
COc1ccc(/C(C)=C/C(C)=O)cc1
CC(C)[C@@H]1C[C@H](CC(=O)N2CCO[C@@H](c3cccc(O)c3)C2)CCO1
COc1cccc2c1CCCC2CCCN1CCN(CCCC2CCCc3c(OC)cccc32)CC1
CCOc1ccc(-n2c(SCC(=O)Nc3ccc(OCc4ccccc4)cc3)nnc2-c2cccc(Cl)c2)cc1
C=CCOc1cccc([C@H]2c3c(oc4ccc(Cl)cc4c3=O)C(=O)N2c2cc(C)on2)c1
Cc1ccc(CNC(=O)c2cn[nH]c2N)cc1
CC1=CC(C)(C)N(C(=O)Nc2ccc(Br)cc2)c2cc(C)c(C)cc21
COc1cc2oc(-c3ccccc3)cc(=O)c2c(OC)c1O
O=C1OCCC1N1CCN(c2ccc(F)cc2)CC1
CCO/N=C1\C(O)=Nc2c(Cl)cc(Cl)cc21
O=C(CCn1nncc1-c1cc2cccnc2[nH]1)c1c[nH]c2ncccc12
Cc1oc(-c2ccccc2)nc1C(=O)N(Cc1ccc(C(=O)NC2CC2)cc1)C1CC1
CCCCN(CC)CCCNC(=O)CN1C(=O)/C(=C\c2cccc(Cl)c2)Sc2ccccc21
CN(C)C(=O)[C@H]1CC[C@@H](CNC(=O)Cc2ccc3c(c2)CCCC3)O1
Cc1sc(NC(=O)C2CC2)c(C(=O)OCC(=O)N[C@H]2CCCC[C@@H]2C)c1C
O=C(O)CC[C@@H]1CCCN(C(=O)c2cc(Br)c3c(c2)OCCO3)C1
O=C(Nc1ccc(F)cc1)c1c(-c2ccccc2)c2ccccc2n(Cc2ccccc2)c1=O
COc1cc([C@@H]2NC[C@@H](c3ccc(Cl)cc3Cl)c3c2[nH]c2ccccc32)cc(OC)c1OC
CN(c1ccc(C(=O)NC(CO)c2ccccc2Cl)cn1)[C@@H]1CCN(c2ncnc3[nH]ccc23)C1
C=C(C)C(O)CCC(=C)[C@@H]1CC[C@](C)(O)[C@H]2Oc3cc(C)cc(O)c3[C@H]21
COc1cccc2oc(-c3nc4ccccc4c(=O)n3N=Cc3cc(Cl)c(OCc4ccc5c(c4)OCO5)c(Br)c3)cc12
O=C1S/C(=C\c2c(F)cccc2Cl)C(=O)N1Cc1ccccc1Cl
CN1CCCC(COc2nn3c(-c4ccccc4)nnc3c3c2C2CCC3CC2)C1
Cc1nc(C2(NC(=O)Cc3csc(COc4ccc(Cl)cc4)n3)CCCCC2)no1
O=C(O)c1cccc(S(=O)(=O)N2CCC(Cc3ccccc3)CC2)c1
Cc1ccc(C(=O)N(C)CCc2c[nH]c3ccccc23)cc1
CC(=O)N(c1ccc(Cl)cc1)C(C)C(=O)O
CCn1cc(C(=O)O)c(=O)c2cc(F)c(N3CCN(C/C(=N\O)c4ccc(F)cc4)CC3)cc21
CCN(Cc1ccccc1)C[C@@H]1CCCN(C(=O)[C@@H](N)C(C)C)C1
CC[C@H](CN1CCCC1)NC(=O)Cc1n[nH]c(=O)c2ccccc12
Cc1ccc2c(c1)SCC(=O)N2CC(O)(Cn1cncn1)c1ccc(F)cc1F
CC(=O)c1ccc(-c2nc3ccc(C(=O)N(CCC(C)C)CCC(C)C)cc3n2CCCN2CCCCC2)cc1
C=CCOc1ccc(NC(=O)c2cccc(NS(=O)(=O)c3ccccc3)c2C)cc1
CCCCNc1nc(N)nc2cccc(CCc3ccccc3)c12
Cn1nc(C(=O)NC2CC2)c2c1CN(C(=O)Cc1cccc(F)c1)C2
Cc1ccc(S(=O)(=O)NCCCCCCCCCn2c3c(c4ccccc4c2=O)C(=O)c2ccccc2-3)cc1
Cn1c(=O)n(CCC(=O)OCC(=O)NC2CCCCCC2)c2ccccc21
CN1CCN(C)[C@H](CC(=O)N2CCc3nnc(-c4ccccc4)n3CC2)C1
Cc1cc(N[C@@H]2CCCN(C(=O)c3cc(F)ccc3-c3ncccn3)[C@H]2C)nc(C(F)(F)F)n1
COc1ccc(S(=O)(=O)N(CC(C)C)C[C@@H](O)[C@H](Cc2ccccc2)NC(=O)CN(CC(=O)N(C)C)c2c(C)cccc2C)cc1
O=c1nc(N2CCOCC2)oc2c(-c3ccc(Cl)cc3)c(OCc3cccnc3)ccc12
NCCCCn1c(SCCc2c[nH]c3cc(F)ccc23)nnc1-c1ccc2ccccc2n1
COc1cc(/C=C2/SC(=S)N(CCC(=O)O)C2=O)cc(Cl)c1OCc1cccc(C(=O)O)c1
Cc1cncc(O[C@H]2CCOC3(C2)CN(C(=O)c2cc[nH]n2)C3)n1
CC1=C(O)C(=O)C=C2C1=CC=C1[C@@]3(C)CC[C@@]4(C)CC[C@@](C)(N=C=O)C[C@H]4[C@]3(C)CC[C@@]21C
Cc1cc(=O)[nH]c2cc(NC(=O)c3ccc([N+](=O)[O-])cc3)ccc12
Cc1cc2c(=O)n(NC(=O)c3ccc(COc4cc(Cl)ccc4Cl)o3)c(C)nc2s1
Cc1cccc(NC(=O)CC[C@@H]2N=C(O)N(Cc3ccc4c(c3)OCO4)C2=O)c1
CCCCNC(=O)[C@@H](Cc1ccccc1)N(Cc1ccc(C)cc1)C(=O)COc1cc(C)c(Cl)c(C)c1
COc1ccc(CCn2c(N)c(S(=O)(=O)c3ccc(Cl)cc3)c3nc4ccccc4nc32)cc1
COc1ccc(Br)cc1CN(C)CC(=O)NC(=O)NC(C)(C)C
CC[C@H]1OC(=O)[C@H](C)C(=O)[C@H](C)[C@@H](O[C@@H]2O[C@H](C)C[C@H](N(C)C)[C@H]2O)[C@](C)(OC(=O)NC/C=C/c2cncc3ccccc23)C[C@@H](C)C(=O)[C@H](C)[C@H]2CC(=O)O[C@]12C
Cc1c(Cn2cnc3sc4c(c3c2=O)CC[C@H](C)C4)cccc1[N+](=O)[O-]
CC(C)c1ccc(C(=O)N2CCN(C(=O)c3ccc(Cl)c([N+](=O)[O-])c3)CC2)cc1
C[C@@H]1CCC[C@H](c2cnc(N)s2)C1
C[C@@H]1C(=O)N(CC(F)(F)F)CCCN1C(=O)C[C@H](N)Cc1cc(F)c(F)cc1F
O=C(NCCN1CCCC1)C(c1ccccc1)c1ccccc1
Cc1nc2c(C)cccc2c(SC(=N)N)c1CC=C(Cl)Cl
Nc1nc2sc3c(c2c(=O)o1)CCN(Cc1ccccc1)C3
CNC(=O)[C@H](Cc1ccc(OC)cc1)NC(=O)[C@@H](CC(=O)NO)Cc1ccc(O)cc1
CCN(C(C)=O)c1nc(CN2CCN(C(=O)OC)CC2)cs1
C[C@H]1OC(=O)[C@@H]2C[C@@H]3CCCC[C@H]3[C@H](/C=C/c3ccc(-c4ccc(F)cc4)cn3)[C@H]12
COc1ccc(OC)c([C@@H](C)NC(=O)CCc2ccc3c(c2)OCO3)c1
CC1(C)O[C@H]2CO[C@@H](CN=[N+]=[N-])[C@@H]2O1
CCC1(C)OC(=O)c2ccccc21
CCCCC[C@@H](O)/C=C/[C@H]1C2CCC(C2)[C@@H]1C/C=C\CCCC(=O)O
Cc1ccc(COc2cc(F)c3nc(CC4(C(=O)O)CCCC4)n(Cc4ccc(Br)cc4)c3c2)nc1
CC(C)N(C)C(=O)c1ccc(Cl)c(NC(=O)c2ccncc2)c1
Cc1cc(C)n(-c2ncnc3c2c(C)c(C)n3CC(C)C)n1
O=C(O)c1ccc(OCCc2c(CCNS(=O)(=O)CCN3CCNC3=S)n(C(c3ccccc3)c3ccccc3)c3ccc(Cl)cc23)cc1
CCOC(=O)C1=C(C)N=c2s/c(=C\Nc3ccc(Br)cc3)c(=O)n2[C@H]1c1ccccc1
CN1CC(=O)N(c2cccc(NC(=O)N3CCCN4CCC[C@H]4C3)c2)C1=O
Cc1cc(=O)c2ccc3c(c2o1)[C@@H](OC(=O)C12CCC(C)(C(=O)O1)C2(C)C)[C@@H](OC(=O)C(C)C)C(C)(C)O3
COc1ccc(C(=O)N2CCC(N3C[C@@H](OCC4CC4)C34CCOCC4)CC2)cn1
Cc1cc(=O)oc2cc(NCCOc3no[n+]([O-])c3S(=O)(=O)c3ccccc3)ccc12
C[C@@H]1NCCn2cc(-c3nc4c(cc3F)C(=O)C(C(=O)O)CN4C3CC3)cc21
Cc1nc2cc(CCC(=O)N[C@H](C(=O)O)c3ccccc3)ccc2n(C)c1=O
COCc1c(C#N)c(O)nc(/C=C/c2ccc(-c3ccc(Br)cc3)o2)c1[N+](=O)[O-]
O=c1c2ccccc2nc2n1-c1ccc(Br)cc1/C2=N\OCCN1CCCCC1
COc1ccc(/C=C(/C(=O)O)c2cccc3ccccc23)cc1OC
CC(C)N(O)CCc1ccc2c(c1)C(=O)c1ccccc1CO2
COC(=O)C[C@@H]1S[C@@H](C(=O)OC)[C@@H](C(=O)OC)C1=O
Cc1cc(-c2n[nH]c3cc(NC(=O)NCc4nncs4)ncc23)ccn1
COc1cccc(-c2cc(C(=O)N3N=C(C)CC3(O)C(F)(F)F)[nH]n2)c1
O=C(O)CC(NC(=O)c1ccc(CCC(=O)NC2=NCCCN2)s1)c1ccc(-c2ccccc2)cc1
Cc1ccc(S(=O)(=O)NCCCNCc2cn(C)nc2-c2ccccc2)cc1
CCc1cccc(NC(=O)c2ccc[nH]2)c1CC
Cn1cc(S(=O)(=O)N2CCCC(C(=O)O)C2)cn1
O=C1CCCc2ccc3c(c21)CC1(Cc2ccccc2C1)C3
CC[C@@H]1CCCCN1c1nc(-c2ccncc2)nc2ccccc12
CC(C)C[C@H](NC(=O)CCCC[C@@H]1SC[C@@H]2NC(=O)N[C@H]12)C(=O)N[C@@H](Cc1ccc(O)cc1)C(=O)N[C@@H](CC(=O)O)C(=O)NC(C)P(=O)(Oc1ccc(Cl)cc1)Oc1ccc(Cl)cc1
CN(C)CC1Cc2cc(Cl)ccc2C1=O
COc1cc(OC)c2ccc(=O)oc2c1/C=C/C(C)=O
O=C(CSc1nc(-c2ccc(Br)cc2)[nH]c1-c1ccc(F)cc1)Nc1nccs1
O=C(O)c1ccc(Oc2ccc(CN3CCC(N4C(=O)N(C5CCOCC5)C[C@H]4c4cccc(Cl)c4)CC3)cn2)cc1
CCCCNC(=O)N1CCN(c2ccc(NC(=O)Nc3ccc(Br)cc3)cc2)CC1
Cc1cc(=O)oc2cc(OCC(=O)N/N=C/c3cc([N+](=O)[O-])ccc3O)ccc12
Cc1ccc2nc(-c3ccc(NC(=O)CN4C(=O)N[C@@](C)(c5ccc(C)o5)C4=O)cc3)sc2c1
COc1cccc(NC(=O)C2(S(=O)(=O)c3ccc(Cl)cc3)CC2)c1
COC(=O)c1cccc2c1c(C(=O)CCCCCCn1c(C)nc3cnccc31)cn2C(=O)N(C)C
Cc1ccc(C(C)C)c(OCC(=O)N2CCN(c3ncccn3)CC2)c1
NC(=O)c1ccc(NCC[C@@H]2CCCCN2)nc1
Cc1nnc(SCC(=O)N[C@@H](c2ccc3c(c2)OCCCO3)C(C)C)s1
CC[n+]1cccc(NC(=O)c2ccc(NC(=O)c3ccc(C(=O)Nc4ccc(C(=O)Nc5ccc[n+](CC)c5)cc4)c(Cl)c3)cc2)c1
CCCc1c(-c2nc(C)no2)c(C(=O)OCC)c2c(-c3ccccc3)cc(N3CCOCC3)nn12
COc1cc(/C=N/NC(=O)CNC(=O)c2ccco2)ccc1O
CC(C)CC(=O)N1CCC(Nc2ccc(Br)cc2)CC1
O=C(CNC(=O)C1CC1)N[C@H](c1ccc(Br)cc1)C1CCC1
CN(Cc1nc(-c2ccncc2)no1)Cc1cccs1
O=C(NP(=O)(N1CCOCC1)N1CCOCC1)C1=C(N2CCOCC2)/C(=C\c2ccccc2)CC1
O=C(N[C@@H]1CN(Cc2ccc3[nH]ccc3c2)C[C@H]1O)c1c[nH]cn1
Cc1ccc2c(C)c(C(=O)N3CCN(C4CCS(=O)(=O)C4)CC3)oc2c1C
Nc1ncnc2c1ncn2C1COCC1O
O=C(Nc1nc(NC(=O)c2ccccc2)n(-c2ccccc2)n1)c1ccccc1
N#C[C@]12C(N)=NC(=O)[C@]1(C#N)[C@H]1C=C[C@H]2C1
CCOc1cc(N(C)CC(F)F)ncn1
N#CN/C(=N\CCCCCCOc1ccc(Cl)cc1)Nc1ccncc1
O=C(CC(=O)Nc1ccc(Cl)cc1)Nc1ccc(Cl)cc1
CCn1nc(C)nc1-c1cc(F)cc2cccnc12
O=C1N=C(O)N(Cc2ccc(F)cc2)C(=O)/C1=C/NN1CCOCC1
CC[C@@H](C)NC(=O)[C@H](Cc1ccccc1)N(Cc1cccc(Cl)c1)C(=O)CCN1C(=O)c2ccccc2S1(=O)=O
C[C@@H](NC(=O)COC1CCCCC1)c1ccc(S(N)(=O)=O)cc1
COc1nc(-c2cccc(F)c2)c(Cl)cc1-n1c(=O)ccc2cc(S(=O)(=O)Nc3ccon3)ccc21
CCN(CC)S(=O)(=O)c1ccc(NC(=O)COc2ccc(C)c(C)c2)cc1
O=S(=O)(N[C@@H]1C[C@H](Cn2cc(-c3cccnc3)nn2)[C@@H](O)[C@H]1O)c1ccccc1
C=CCOc1ccc(Cl)cc1/C=c1\sc2n(c1=O)[C@@H](c1ccc(OCC)cc1)C(C(=O)Nc1ccccc1)=C(C)N=2
CC(C)Oc1ccc(C(=O)N(CCc2ccccc2Cl)C2CNC2)cc1
Cc1cc2cc(CNC(=O)c3ccc(C)c([N+](=O)[O-])c3)ccc2[nH]1
Sc1nnc(-c2ccc3c(c2)OCO3)n1-c1ccc(Cn2cncn2)cc1
O=C(O)CCC/C=C\C[C@@]1(c2cccnc2)C2CCC(C2)[C@H]1COc1ccc(-c2ccccc2)cc1
Cc1cc(-c2nc(C3CC3)n[nH]2)c(NC(=O)C(C)(C)C)s1
COCCN(CC(=O)N1N=C(c2ccccc2F)C[C@@H]1c1ccc2c(c1)OCO2)C(=O)NC(C)(C)C
N#CCOC(=O)c1ccccc1NCc1ccco1
COc1ccc([C@H]2C3=C(N=C4N=CNN42)c2ccccc2O[C@H]3c2ccc(Cl)c(F)c2)cc1OC
Cc1ccc(Nc2nc(Cl)nc(Nc3cccc(C(F)(F)F)c3)n2)cc1
Cn1c(C(=O)Nc2ccccc2F)cc2occc21
CCOC(=O)[C@H]1Cc2cc(S(=O)(=O)N(C)c3cccc(OC)n3)ccc2O1
CCOc1nc2cccc(C(=O)NC3CCCCC3)c2n1Cc1ccc(-c2ccccc2-c2nnn[nH]2)cc1
CC(C)Oc1ccccc1/C=C1\SC(=N)N(c2nccs2)C1=O
CCCOC(=O)Cn1c(=O)oc2cc(S(=O)(=O)Nc3ccc(C#N)cc3)ccc21
Cc1ccc(C(=O)CNc2cccc(Cl)c2)cc1
CSc1nnc(NC(=O)CN(c2ccc(F)cc2)S(=O)(=O)c2ccc3c(c2)OCCO3)s1
Cc1cc(C)c2nc(NC(=O)C3CCN(c4cnccn4)CC3)sc2c1
NC(=O)c1cc(-c2ccccc2)cc2c(C3CCC(NCc4ccccc4)C3)c[nH]c12
COc1ncc([C@]2(O)CCC[C@@H]3CN(Cc4ccc(OC)c(C)c4C)C[C@@H]32)c(OC)n1
COCC(=O)NC[C@H](c1ccco1)n1cccn1
COc1ccc(/N=C\c2cn(Cc3ccc(C(=O)O)o3)c3ccccc23)cn1
CC(C)(C)NCCOCCOc1ccc(Cl)cc1C(C)(C)C
O=C(c1ccccc1)[C@@]12[C@H]3[C@H]4[C@@H]5[C@@H]6[C@@H]7[C@H]8[C@H]9[C@H]%10[C@@H]([C@H]%11[C@H]9[C@H]([C@H]85)[C@H]4[C@H]%111)[C@H]2[C@H]([C@@H]63)[C@H]7%10
CCc1ccc(-n2c(S)nnc2CSc2nnc(-c3ccn(C)n3)n2C[C@H]2CCCO2)cc1
C[C@H](NC(=O)CCCNC(=O)c1ccc(F)cc1F)c1ccco1
CON(C)c1nc2cc(Cl)c(Cl)cc2nc1S(C)(=O)=O
O=[N+]([O-])c1ccc(COP(=O)(N(CCCl)CCCl)N(CCCl)CCCl)cc1
CCOC(=O)Cc1cn2c(n1)sc1ccccc12
Cc1cc(C)c2sc(NC(=O)c3ccc(N4C(=O)CCC4=O)cc3)nc2c1
CCN1CCN(C(=O)c2cc(S(=O)(=O)N3CC(C)CC(C)C3)ccc2Cl)CC1
Cc1nc(N)nc2c1cc(-c1cnc3[nH]ccc3c1)c(=O)n2C1CN(C(=O)OC(C)(C)C)C1
CC[C@H](C)NC(=O)[C@H](Cc1ccccc1)N(Cc1ccc(C)cc1)C(=O)COc1ccc([N+](=O)[O-])c(OC)c1
CC[C@@H](Oc1ccc2ccccc2c1)C(=O)NC[C@H]1COc2ccccc2O1
COc1ccccc1-c1cc(NC(=O)c2ccc(NS(C)(=O)=O)cc2)ncn1
Nc1ncc(-c2ccccc2)n1CCCCCCCn1c(-c2ccccc2)cnc1N
COC1CCN(C(=O)c2nn(C)cc2NC(=O)c2nc(C3CC3)ccc2Nc2cncnc2)C1
O=C(N[C@H]1CN(Cc2ccco2)[C@H]2CCCO[C@@H]12)c1cnccn1
O=C(Nc1ccc(C(F)(F)F)cc1)c1cnon1
COCCOc1ccc(C(F)(F)F)cc1NC(=O)c1ccc(C)c(F)c1
CC[C@@H](CCS(C)(=O)=O)N1C(=O)[C@@](C)(CC(=O)O)C[C@H](c2cccc(Cl)c2)[C@H]1c1ccc(Cl)cc1
CC(=O)N(c1ncnc2c1ncn2C1CC1)C1CC1
CC(C)=CCC/C(C)=C/CNC(=O)COC1C2CC3CC(C2)CC1C3
CO[C@@H]1CCC[C@@H](CC(=O)N2CCOC[C@H]2CC(C)=O)C1
CCC[C@]1(OC)OC(=O)c2c1cc(O)c(O)c2C
CC[C@@H](C)OC(=O)Cn1cnc2sc3c(c2c1=O)CC[C@@H](C)C3
OC(Cn1cncn1)(Cn1nnc2cc(Cl)ccc21)c1ccc(F)cc1F
CC(C)[C@H](N)C(=O)OCC(CO)OCn1cnc2c(=O)[nH]c(N)nc21
O=C(O)c1ccc(/C=N/NC(=O)c2ccccc2)cc1
C[C@@](O)(c1cccc(-c2cccc3cc([C@H](NS(=O)(=O)C4CC4)c4ccccc4Cl)sc23)c1)C(F)(F)F
COc1ccc(-c2cc(C(F)(F)F)cc(C3(C(C)C)C(C#N)=C(N)Oc4n[nH]c(C)c43)c2)cc1C(=O)O
Cc1ccc(C(=O)N2C[C@H](Oc3cc(C#N)ccn3)CC[C@H]2C)c(-n2nccn2)n1
CCO[P@](=O)(O)c1ccccc1OCCOCCOCCOCCOc1ccccc1[P@@](=O)(O)OCC
O=C(O)/C=C/c1nc2sc3c(c2c(=O)[nH]1)CCC3
CC(=O)C1=C(C)N(c2cccc(C(F)(F)F)c2)C(=O)N(C)C1c1ccc(C#N)cc1C(=O)NCc1cccnn1
CC1=C2C[C@H]3[C@@](C)(O)CC[C@@]34O[C@@]2(C[C@]4(C)O)OC1=O
COc1cccc(F)c1CN1CC(NC(=O)c2ccc3[nH]nc(-c4ccc5nccn5c4)c3c2)CCC1C1CC1
CN(C[C@@H](O)C(F)(F)F)C1CCC(O)CC1
C=C1[C@H](OC2OC(CO)C(O)C(O)C2O)[C@]23C[C@H]1CCC2[C@]1(C)C(CC[C@@]2(C)C(=O)O[C@H](O)[C@H]21)[C@@H]3O
CCCCCOc1cccc([C@H]2C(C(=O)c3ccc4c(c3)C[C@H](C)O4)=C(O)C(=O)N2CCOC)c1
CN1CCN(Cc2cc(Cl)ccc2OC[C@H]2CCCO2)CC1=O
COc1ccc(NC(=O)c2cccn(OCc3ccccc3F)c2=O)c(OC)c1
CCOc1ccccc1N(CC(=O)N(Cc1ccc(Cl)c(Cl)c1)[C@@H](CC)C(=O)N[C@H](C)CC)S(C)(=O)=O
COC(=O)[C@@]1(c2ccccc2)Cc2ccccc2-c2ccccc21
O=C1NC(=S)N(c2ccc(Cl)cc2)C(=O)/C1=C/NCCc1c[nH]c2ccccc12
CNC(=O)CN(CCO)Cc1ccccc1Br
CCN(CC)CCCNC(=O)Cn1ncc2c3ccccc3n(Cc3c(C)cc(C)cc3C)c2c1=O
COc1ccc([C@@]2(C)NC(=O)N(CC(=O)N(C)[C@H]3CCS(=O)(=O)C3)C2=O)cc1OC
O=C(C1=C(O)C(=O)N(c2nncs2)[C@H]1c1cccc(Br)c1)c1ccc(F)cc1
O=C(O)c1cc(Oc2cccc(CCNC[C@H](O)c3cccnc3)c2)ccc1F
C/C(=N\c1ccc(Br)cc1)C1=C(O)[C@H](N)[C@@H]2Cc3c(c(O)c4c(O)c(C)ccc4c3C)C(=O)[C@]2(O)C1=O
O=C(Nc1ccc(CN2CCOC2=O)cc1)c1cc(C(F)F)[nH]n1
O=C(Nc1sc(N/N=C/C=C/c2ccccc2)nc1-c1ccc(F)cc1)c1ccccc1
COc1ccc(CN2CCN(c3cc4c(cc3F)c(=O)c(C(=O)O)cn4C3CC3)CC2)c(OC)c1OC
CCn1ccnc1CN[C@H]1c2cccc(F)c2CC[C@H]1C
CCCCCCCCCCCCCCCCCCNC(=O)[C@H]1O[C@@H]2OC3(CCCCC3)O[C@@H]2[C@H]2OC3(CCCCC3)O[C@@H]12
CCN(CC)C(=O)C1CCN(C(=O)Nc2cccc(Cn3nc(-c4cccc(C#N)c4)ccc3=O)c2)CC1
CCCn1cnc2c(c1=O)c1nc3ccccc3nc1n2-c1cc(C)cc(C)c1
Cc1cccc([C@@H]2C[C@@H]2C(=O)N(C)[C@@H]2CCCC[C@H]2S(C)(=O)=O)c1
O=S(=O)(NCc1nc(-c2ccco2)n[nH]1)c1ccccc1
COc1ccc(NC(=O)Cn2cnc3onc(-c4ccc(C)cc4)c3c2=O)cc1OC
COc1ccc(OCc2cc(C(=O)NCc3ccncc3C)n[nH]2)c(Cl)c1
COC(=O)Cc1ccc(F)cc1Cl
O=C1OCc2ccccc2N1C1CCN(S(=O)(=O)c2csc3ccccc23)CC1
CC(Oc1ccc2c(c1)OC[C@H](Cc1cccnc1)[C@@H]2O)c1ccc2ccccc2n1
O=Cc1ccnc(OCc2ccccc2)c1
Cc1cccc([N+](=O)[O-])c1NC(=O)c1cccc(Br)c1
N=C(N)Nc1ccc(NC(=O)c2ccc(NC3=NCCN3)cc2)cc1
CCOc1ccc(N(CC)S(=O)(=O)N2CCC[C@@H](C(=O)NCc3ccccc3)C2)cc1
COc1ccc(S(=O)(=O)Nc2ccc3c(c2)CC(=O)N([C@@H](C)CO)C[C@@H](C)[C@@H](CN(C)Cc2ccc(Cl)c(Cl)c2)O3)cc1
CC(Sc1ccc(N)cc1)C(=O)c1ccccc1
CC[C@@H](Nc1ccc(C)c(CN2CC[C@@H](C(=O)O)C2)c1)c1ccc(Cl)c(C)c1
CCc1nc2ccc(C(=O)NCc3ccc(SC)cc3)cc2nc1CC
COc1ccc(S(=O)(=O)NCc2cccc(CN3CCCC3)c2)cc1C(C)(C)C
Cc1cc(Nc2ccc(Br)cc2)n2ncnc2n1
CN(C)C(=O)Cc1nc(CN2CCn3c(nnc3C3CC3)C2)cs1
COC1(c2cc(F)cc(OCc3cc(-c4ccccc4)n(-c4ccc(S(N)(=O)=O)cc4)n3)c2)CCOCC1
CC(=O)Nc1ccc2c(Nc3ccc(NS(C)(=O)=O)cc3)c3ccc(Cl)cc3nc2c1
CC(=O)Nc1ccc(S(=O)(=O)NCC(=O)N2CCN(S(=O)(=O)c3cccs3)CC2)cc1
Fc1cnc(N2CC[C@@]3(CN(c4cccnc4)CCC3(F)F)C2)nc1
COc1ccc(-c2nnc(SCC(=O)NC3CCCCC3)n2C2CCCCC2)cc1OC
CCOc1c(Br)cc(C2C(C(=O)OC)=CN(C)C=C2C(=O)OC)cc1OC
CCOC(=O)c1cnc(O)c([C@@H](CC(=O)NCCc2c[nH]cn2)c2ccc(OC)cc2)c1O
COc1ccc(C(=O)COC(=O)CN2C(=O)[C@H]3[C@H]4C=C[C@H]([C@H]3C2=O)[C@@H]2C[C@@H]42)cc1
Cc1ccc2c(c1)N(CCCC(=O)NCCC1=CCCCC1)C(=O)CO2
Cc1noc(C)c1C(=O)NC[C@@]12CCC[C@H]1N(CC1CCCCC1)C(=O)CC2
COc1ccc(/C=c2\sc3nc(-c4ccccc4OC)nn3c2=O)c(OC)c1
CCCC[C@@H](NC(=O)Cc1c(C)c2cc3c(-c4ccc(Cl)cc4)coc3cc2oc1=O)C(=O)O
Cc1c(C(=O)c2c[nH]n(C)c2=O)ccc(S(C)(=O)=O)c1C1=NOCC1
O=C1C=C(SSC2=CC(=O)C(Br)=C[C@]23CCNC2=C3C3=NCCc4c[nH]c(c43)C2=O)[C@]2(C=C1Br)CCNC1=C2C2=NCCc3c[nH]c(c32)C1=O
Cc1ccc(NC2CCN(C(=O)c3cnn(C(C)(C)C)c3)CC2)nn1
COc1cccc(N(CCCC(=O)Nc2ccc(Br)cc2)S(C)(=O)=O)c1
CCOC(=O)c1cc(-c2ccc(OC)c(S(=O)(=O)Nc3ccc(C)cc3Br)c2)on1
CC1(C)C(=O)N(C[C@H]2CO2)C(=O)N1CN1C(=O)N(C[C@H]2CO2)C(=O)C1(C)C
COc1ccc(-n2c(C)cc(C(=O)CSc3nnc(N)s3)c2C)cc1
COc1cc(NC(=O)c2cc(C)on2)cc(C(=O)Nc2cccc(C(F)(F)F)c2)c1
CC[C@H](Oc1ccc(C(C)(C)C)cc1)C(=O)Nc1nnc(-c2ccc(OC)cc2)s1
Cc1nc2cc(-n3ncc(C(=O)c4nc5ccccc5s4)c3N)ccc2[nH]1
COc1cc2cc(CNc3ccc4c(c3)CCC4)c(=O)[nH]c2cc1OC
CCc1ccc(C(=O)N2CCC(C(=O)N3CCC[C@H]3C(N)=O)CC2)cc1
O=C(O)c1cn2c3c(c(N4CCN(C(=O)C(F)(F)F)CC4)c(F)cc3c1=O)SCC2
O=C(NC1CCCC1)c1ccc(CS(=O)(=O)c2ccc(Cl)cc2)o1
COc1ccc(Nc2nc(NCCc3ccccc3)nc(N3CCOCC3)n2)cc1
Cc1cc(F)ccc1Nc1c2ccccc2[n+](C)c2c1[nH]c1ccccc12
CC(C)(C)N1CCC(N(c2ccc(C(F)(F)F)cc2)c2cccnc2)CC1
COc1ccccc1N1CCN(C(=O)c2cc(Cc3n[nH]c(=O)c4ccccc34)cc(F)c2F)CC1
COc1ccc(C(C)Cn2ccnc2O)cc1OC1CC2CCC1C2
CN(C)CCN=c1[nH]c(-c2ccccn2)cc(=Nc2c(F)cccc2Cl)[nH]1
COc1ccccc1-n1cnnc1SCc1nc(-c2ccccc2)no1
COc1ccccc1CC(=O)N1CCN(CCc2ccccc2)CC1
COc1ccc(CCN2C=CC(c3ccccc3)(c3ccccc3)C=C2)cc1OC
O=C(C[C@H]1CCS(=O)(=O)C1)N[C@@H](c1ccccc1)c1ccc(Cl)cc1
O=C(c1ccco1)N1CCc2onc(Cn3cccn3)c2C1
CN(CC(=O)N(Cc1ccc(C2CCNCC2)cc1)c1ccc(O)c(C(=O)O)c1)S(=O)(=O)c1ccc(-c2ccccc2)cc1
Cc1ccc(Cl)cc1NC(=O)Cn1c(-c2nc(-c3ccccc3)no2)cccc1=O
COc1ccc(/N=C2\NC(=O)/C(=C/c3cccc(OC(=O)c4ccc(Cl)cc4)c3)S2)cc1
CCN(C(=S)NC(=O)c1cccc(OC)c1OC)c1cccc2ccccc12
O=C1CC2(CCN(c3nncs3)C2)CN1c1ccc2c(c1)OCCO2
Cc1cc2cc(C(=O)N3CCO[C@H](c4nc(N(C)C)ncc4-c4cncnc4)C3)ccc2o1
C[C@H]1O[C@@H](n2cnc3c(N)ncnc32)[C@H](O)[C@@H]1O
O=C(NCc1ccc(N2CCOCC2)nc1)c1cccnc1SC(F)F
CCCC1CN(CCc2c[nH]c3ccccc23)CCC12CNC(=O)O2
COc1cccc(C(=O)NC2C(O)[C@@H](CO)O[C@H]2n2cnc3c(NCc4cccc5ccccc45)ncnc32)c1
Cc1cc(O)nc(Nc2ccccc2C)n1
COc1ccc(OC(F)(F)F)cc1-c1nccc2cc(S(=O)(=O)Nc3ccncn3)ccc12
CCC1=NN2C(=N)/C(=C/c3ccc(OCCOc4ccc(Br)cc4)c(OC)c3)C(=O)N=C2S1
CCOC(=S)CS(=O)(=O)c1cccs1
NC(=S)Nc1cccc(OCCc2ccccc2)c1
Cc1nc(C2(NC(=O)CSC(c3ccccc3)c3ccccc3)CCCCC2)no1
CCC1=C(C)C(C#N)C(=S)N=C1C
CN(C)S(=O)(=O)N1CCC2(CC1)c1nccn1CCN2Cc1ccncc1
COc1cccc(C2CC(=O)c3cc(OC)ccc3O2)c1
Cc1cc(=O)oc2cc(NC(=O)Cc3csc(-c4ccccc4)n3)ccc12
CCC(C)C(=O)NCc1ccc(-n2cncn2)nc1
CSCC[C@H](NC(=O)c1ccncc1)c1cc(=O)[nH]c(-c2cccnc2)n1
C=CCN1C(=O)C(C)(C)COc2ccc(NS(=O)(=O)c3cc(C)c(OC)c(C)c3)cc21
CN(CCN=C(N)N)S(=O)(=O)c1cccc2cnccc12
C[C@]12CC=C(c3ccc(O)cc3)C[C@@H]1CC[C@@H]2O
CCCc1ccc(Cl)c(S(=O)(=O)NCC(F)(F)F)c1
CCn1c(=O)/c(=C2\Sc3cc(Cl)ccc3N2C)s/c1=C\c1scc[n+]1Cc1ccc(C(F)(F)F)o1
COC(=O)c1sccc1NC(=O)CN1CCC([C@H](O)c2ccccc2)CC1
CCn1cnnc1C1CCN(C(=O)[C@@H](C)n2c(C)ccc2C)CC1
Cc1ccccc1-c1ccc(-c2ccc3c(c2)c(C)c(CC(C)(C)C(=O)O)n3Cc2ccc(Cl)cc2)cc1F
COc1ccc(N/C(C)=C2/C(=O)NC(=O)N(C3CCCCC3)C2=O)c(OC)c1
COc1ccc(CNc2nc(N3CC4CC4C3)ncc2C(=O)NCc2ccccc2)cc1Cl
COCCN(CC(=O)N1N=C(c2ccc(OC)cc2OC)C[C@@H]1c1ccc(C)cc1)C(=O)CC(C)(C)C
COc1cc2c(c(OC)c1OC)-c1ccc(SC)c(=S)cc1[C@@H](/N=C(/C)S)CC2
COc1ccc(-c2nc(C(=O)Nc3c(C)nn(-c4ccccc4)c3C)cs2)cc1
Cn1c(C(F)(F)F)nn(CCNC(=O)NCc2ccccc2)c1=O
CC(C)c1cc(C(=O)N[C@@H]2CCOC[C@H]2Oc2ccc(C(=O)O)cc2)no1
CS(=O)(=O)Nc1ccc2c(c1)S(=O)(=O)N=C(C1=C(O)[C@@H]3[C@H]4CC[C@H](C4)[C@@H]3N(CC3CCCC3)C1=O)N2
Cn1cc(CN2CCC[C@@H](NS(C)(=O)=O)C2)c(-c2ccccc2)n1
N=C(N)NCCC[C@H](NC(=O)[C@@H]1CC[C@H]2CN(C(=O)CCOc3ccccc3)CC(=O)N21)C(=O)c1nccs1
COCOc1ccc(/C=C/C(=O)c2ccc(O)c(C)c2O)c(OCOC)c1
Nc1nc(OCc2ccccc2)c2nnn(CCO[C@@H]3OC(CO)[C@H](O)[C@H](O)C3O)c2n1
COc1ccc(-c2cc(C(F)(F)F)c(C#N)c(SCC(N)=O)n2)cc1OC
Cc1ccc(-c2c[nH]c(C3(NCc4ccncc4)CCCC3)n2)cc1
CCN(c1ccccc1)S(=O)(=O)c1ccc(C(=O)N[C@H](C)c2ccc3c(c2)OCCO3)cc1
Cc1cc(C)cc(O[C@H](C)C(=O)NCCSCc2ccc(Cl)c(Cl)c2)c1
O=c1oc2ccccc2c2oc3c(F)c(O)c(O)cc3c12
Cc1cccc(O[C@@H](C)C(=O)NC(C)(C)c2noc(CN(C)C)n2)c1
Cc1[nH]c2ccccc2c1-c1ccnc(Nc2ccc(Cl)cc2)n1
COC(=O)C1(NC(=O)CN2C(=O)CCOc3ccccc32)CCC(C)CC1
O=S(=O)(c1ccc2c(c1)OCO2)N1CCCC[C@H]1CN1CCCC1
N#Cc1ccc(Cn2cc(C(=O)C(=O)Nc3ccc4ncccc4c3)c3ccccc32)cc1
COc1cc(F)ccc1-c1cc(C(=O)O)cc(S(=O)(=O)NC(C)C)c1
CCCc1nc2ccc(Br)cc2c(=O)n1/N=C/c1cc(Cl)c(OCc2ccc(Cl)cc2Cl)c(Br)c1
COc1ccc(C(=O)N[C@@H](Cc2c[nH]c3ccccc23)C(=O)Nc2ccc(C(=O)NO)cc2)cc1
CCSCCN1CC[S@](=O)C[C@H]1c1cnn(C)c1
CC(C)(O)CCCC[C@H]1CC[C@@H](CC[C@]2(C)CC[C@@H](O)CC2)C1
NC1CCN(CCNCc2cccc(-c3ccc(-c4nc5cc(C(F)(F)F)ccc5[nH]4)cc3)c2)C1
CC(C)c1nccn1-c1cccc(C2CCCN(S(=O)(=O)N(C)C)C2)n1
CNC(=O)c1ccc(-c2ccc3nnc(COc4ccnc5cc(OC)ccc45)n3c2)s1
C[C@H]1C[C@H](C)CC[C@@H]1N
COc1ccc(N2CCN(C(c3cccs3)C(C)NS(C)(=O)=O)CC2)cc1
CN(c1nc2nonc2nc1N(C)[N+](=O)[O-])[N+](=O)[O-]
CCCCCc1cn(COCCO)c(=O)[nH]c1=O
Sc1nnc(CCc2nc3ccccc3[nH]2)n1-c1ccccc1
N=C1/C(=C\c2ccc(Sc3ccc(Cl)cc3)o2)C(=O)N=C2SC(CC(=O)N3CCOCC3)=NN12
Cn1nnnc1SCC(=O)Nc1nn(-c2ccccc2)nc1C(N)=O
CN(C)c1nc(-c2ccccc2)nc2c1CCN(C(=O)c1n[nH]cc1Cl)C2
CC1(C)CCC(CN2CCN(c3ccc(C(=O)NS(=O)(=O)c4ccc(NCC(F)(F)F)c([N+](=O)[O-])c4)c(Oc4ccc5[nH]ccc5c4)c3)CC2)=C(c2ccc(Cl)cc2)C1
Cc1ncncc1C(=O)N1CCC[C@@H]1[C@H]1CCCN1C
N#Cc1ccc(C(=O)N2CC[C@H]3[C@H]2CCN3CC2CC2)cc1
COCCCN1C(=O)CCc2c(C)nc(CN(C)C(=O)c3cccc(OC)c3)nc21
COc1ccc(/C=C2/Sc3ccccc3N(CC(=O)NCCN3CCN(c4cccc(Cl)c4)CC3)C2=O)cc1Br
CCc1nc(Cl)c2n1CCN([C@@H](C(=O)NC)c1ccccc1)[C@H]2CCc1ccc(C(F)(F)F)c(F)c1
O=C(CSc1ncnc2cc(-c3ccc(F)cc3)sc12)NCCc1cccs1
Cc1cccc(NC(=O)Nc2ccc(-c3c(C)nc4ccnn4c3N)cc2)c1
CN(C(=O)c1ccc(NC(=O)Cc2cccc(NC(=O)C3CCN(C(=O)C4CCCC4)CC3)c2)cc1)C1CCCC1
CCOC(=O)[C@@H](NP(=O)(OC[C@H]1O[C@@H](n2cc(/C=C/Br)c(=O)[nH]c2=O)C[C@@H]1O)Oc1cccc2ccccc12)C(C)C
C[C@@H](c1ccccc1)N1CCN(C(=O)Cn2cc([N+](=O)[O-])ccc2=O)CC1
CC(C)c1ccc(N2C(=O)/C(=C\c3ccccc3Sc3ccccc3)C(=O)NC2=S)cc1
CC[C@@H](N[C@H](C)CC(N)=O)c1ccc(Cl)c(C(=O)c2ccns2)c1F
CCCOc1nccc(N2CC[C@@H](Oc3ccc([C@H](C)NC(C)=O)cc3)C2)c1OC
CC(C)[C@H](C(=O)NO)N(CCNC(=O)c1cccc(C(=O)NCCN([C@@H](C(=O)N(C)C)C(C)C)S(=O)(=O)c2ccc(-c3ccccc3)cc2)c1)S(=O)(=O)c1ccc(-c2ccccc2)cc1
Cc1noc(CCNC(=O)c2cc(NC(=O)c3cc(-c4ccccn4)c(F)cc3Cl)n(-c3ccccc3)n2)n1
O=C(CN1CCC[C@H](Cn2cncn2)C1)N1CCO[C@@H]2CCCC[C@H]21
Cc1ccccc1NC(=O)N(Cc1nc(-c2ccc(Cl)cc2)no1)C(C)C
COCc1cccc(NC(=O)c2ccccc2NS(=O)(=O)c2ccc(C)cc2)c1
C/C(=C\c1cnc2ccsc2c1)c1cnccn1
O=C1CCc2ccccc2N1C1CCN(Cc2ccccc2)CC1
Cc1ccc(S(=O)(=O)c2cnc3cc(F)ccc3c2N2CCC(C)CC2)cc1Cl
CO[C@@H](C)C(=O)N1CCCC12CCCN(c1ncnc3[nH]ccc13)C2
CC(C)Cc1noc([C@@H](C)NC(=O)c2ccc3c(c2)OCC(=O)N3)n1
O=C(Nc1ccccc1)c1ccc2noc(-c3ccc(Cl)cc3)c2c1
Cc1ccc(OCC(=O)Nc2nc3c(Cl)cccc3s2)cc1
Cc1ccc(C(=O)N2CCO[C@@H](C)C2)cc1C
Cc1ccc(NS(=O)(=O)c2cc(C(=O)NCc3ccccn3)ccc2Cl)cc1
CCCCOC(=O)Nc1ccc2cnn(Cc3ccc(C(=O)O)cc3OC)c2c1
Cc1cnc(Nc2cc(N3CCC[C@@H](c4ccc(-c5noc(C(F)(F)F)n5)cn4)C3)ncn2)s1
COC[C@@H]1CCCN1CCc1c[nH]c2ccc(-c3cccs3)cc12
Cc1ccccc1CSCCNC(=O)[C@H]1CCCN(S(C)(=O)=O)C1
Cc1cc(NC(=O)C(C)Oc2ccc(Cl)cc2Cl)no1
Clc1ccccc1CN1CCN(c2ncccn2)CC1
CN1CC2(CCN(c3nc(-c4cnc(N)nc4)cc(N4C[C@@H]5C[C@H]4CO5)n3)CC2)C1
CCOC(=O)C1CCCN(S(=O)(=O)CCNC(=O)c2ccccc2)C1
CCOCCC(=O)Nc1nnc([C@H]2CC(=O)N(c3ccc(CC)cc3)C2)s1
C[C@H](Oc1cccc2c1CCCC2)C(=O)Nc1ccc2c(c1)oc1ccccc12
CN1CCN(c2cc(-c3ccccc3)c3ccccc3c2)CC1
Cc1nnc(CN(C)[C@@H]2CCN(c3c(F)cccc3F)C2=O)n1C
Cc1cnc(C(=O)N(C)[C@@H]2CCc3nnc(C)n3CC2)cn1
CCOc1ccc(C(=O)Nc2nccs2)cc1Cl
CS(=O)(=O)c1ccc2c(c1)C(=O)N[C@H](C(=O)NC1(C#N)CC1)Cc1ccc(c(Cl)c1)OC[C@H]1O[C@@H]1CO2
N=C(N)c1ccc2nc(/C=C/c3ccccc3Cl)[nH]c2c1
COc1ccc2c(c1)CCN(c1cc(NC3CCCC3)nc(C(C)C)n1)C2
COc1cc(OC)c(/C=C/S(=O)(=O)Cc2ccc(OC)c(NS(C)(=O)=O)n2)c(OC)c1
O=C(CCC1CCCCC1=O)c1ccccc1
COCCOc1cc(C(=O)Nc2cccc(-c3csc(C)n3)c2)ccn1
COc1ccc(N(CC(=O)N[C@H](C)c2ccc(C(C)(C)C)cc2)S(C)(=O)=O)c(OC)c1
Cn1cccc1C(=O)N1CCC(O)(CN2CCc3ccccc3C2)C1
COc1cc(NS(C)(=O)=O)ccc1Nc1c2cccc(C)c2nc2c(C)c(C)ccc12
O=C(NCc1ccccc1Cl)[C@@H]1CC(=O)N(c2cccc(C(F)(F)F)c2)C1
C#Cc1cc(C)oc(=O)c1
CC[C@@H](C)N1C(=O)N(c2cccc(Cl)c2)[C@](C)(O)CC1(C)C
CN(C)S(=O)(=O)c1ccccc1CNC(=O)c1ccc2c(c1)C(=O)N(Cc1ccco1)C2=O
CN(C)CCN(Cc1cccnc1)Cc1cc2c(cc1Cl)OCO2
Cn1c(Cc2cccc3ccccc23)nnc1SCC(=O)Nc1ccc(Br)cc1Cl
COc1cccc(NC(=O)N[C@@H](C)COc2ccccc2C)c1
COc1ccc(-c2noc(C(=O)NCCCN3CCOCC3)n2)cc1OC
CC1(c2cc(O)no2)CCNCC1
COc1ccccc1C[C@@H](C)Nc1ccc(F)c(Cl)c1
CCOC(=O)[C@H]1CCN[C@H]1c1ccccc1F
COc1ccc(CN(C)C(=O)N[C@@H](CN2CCCC2)C(C)(C)C)c2cccnc12
COc1nc2ccccc2c(=O)n1C[C@H]1CC[C@H](C(=O)N2CCN(c3ccccc3)CC2)CC1
Cc1c(C)c(S(=O)(=O)n2c(-c3ccccc3)c(/C=N/N3CCN(C)CC3)c3ccccc32)c(C)c2c1OC(C)(C)CC2
Cc1c(-c2ccccc2)oc2c(C(=O)O)cccc2c1=O
CCCCNC(=O)[C@@H](Cc1ccccc1)N(Cc1ccc(Cl)c(Cl)c1)C(=O)CN(c1ccc(C)c(Cl)c1)S(=O)(=O)c1ccc(C)cc1
CCOC(=O)C1(c2ccccc2)CCN(CCN2CCOCC2)CC1
CCc1csc([C@H]2CCCN(C(=O)c3cccc(COC)c3)C2)n1
COCCN(Cc1nc(O)c2ccccc2n1)C(=O)COc1cccc(C(C)=O)c1
CCCCSc1nc(O)c2[n+](n1)[C@H](c1c(OC(C)=O)ccc3ccccc13)N(C(C)=O)c1ccccc1-2
Cc1ccccc1Nc1c([N+](=O)[O-])cnc2ccccc12
CCOc1ccc(-n2c(SCC(=O)Nc3ccc(Cl)cc3Cl)nnc2-c2ccccc2)cc1
COCc1ccc([C@@H]2CCCN2C(=O)Nc2ncnn2C)o1
COc1ccc(NC(=O)C2CCCN(S(=O)(=O)c3ccccc3)C2)c(OC)c1
NCCC[C@H](N[C@H](CNC(=S)Nc1ccccc1)Cc1ccccc1)C(=O)NCc1ccccc1
Cc1ccc(C)c(S(=O)(=O)NC2CCC(NS(=O)(=O)c3cc(C)ccc3C)CC2)c1
CCOCC(=O)Nc1ccc(S(=O)(=O)NCC2CCCO2)cc1
O=C(O[C@H](C(=O)c1ccccc1)c1ccc(Cl)cc1)c1cc(-c2ccccc2)nc2ccccc12
C[C@@H](OC[C@H](O)CNC(=O)C1CCCC1)c1ccccc1
Cn1cccc1C(=O)N1CCc2ncnc(N3CCOCC3)c2CC1
CCc1cnc(-n2nc(OC(C)C)c(Oc3cccc(F)c3F)c2C)nc1
O=C(NC(c1ccccc1)c1ccccc1)c1c(F)c(F)c(F)c(F)c1F
CC(=O)Nc1ccc(C)cc1S(=O)(=O)N1CCC[C@@H]1c1ccccc1C
CCC(C)OC(=O)C(C)c1ccc(CC(C)C)cc1
COc1cc([C@@H]2c3cc4c(cc3[C@H](OC)[C@H]3COC(=O)[C@H]23)OCO4)cc(OC)c1OC
Cc1sc2nc(/C(Cl)=C\c3cn(CC(=O)O)nn3)[nH]c(=O)c2c1-c1ccccc1
O=C(Nc1cc(S(=O)(=O)N2CCOCC2)ccc1Cl)c1cc2ccccc2o1
COC[C@H](O)CN1CC[C@@H](N(C)Cc2noc(C3CC3)n2)C1
Cc1ccc(NC(=O)CN2C(=O)NC3(CCCCC3)C2=O)cc1F
N#CCCN(C(=O)COc1cccc2c1CCC2=O)c1ccc(F)cc1
CC(C)CN(Cc1ccc(F)cc1F)C1CCNCC1
c1ccc(C[n+]2ccn(-c3ccc(-c4cc5ccccc5o4)cc3)c2)cc1
CN(C)CCNC(=O)c1cc([N+](=O)[O-])cc2ccc(-c3ccccc3)nc12
O=C(Nc1nc(-c2ccc(Cl)cc2)cs1)c1c[nH]cc1-c1ccccc1
Cc1noc(C)c1CN1CC[C@]2(CCCN(S(C)(=O)=O)C2)C1
C1CC2(CCN1)CC2
CCCCc1ccc(C/C(O)=N/S(C)(=O)=O)cc1
O=C(NC1CCCCCC1)c1c(O)c2cccnc2n(Cc2ccc(F)cc2)c1=O
COc1ccc(/C=C2\Cc3cc(OC)c(OCCN4CCCCC4)cc3C2=O)cc1
Cc1ccc(C(=O)N2CCOC[C@H]2Cc2cccc(-c3ncon3)c2)c(-n2nccn2)c1
CC[C@H](C)NC(=O)C[C@H](NS(C)(=O)=O)c1ccc(OC)cc1
COc1ccccc1CN=c1cc(C(F)(F)F)[nH]c(=NCC(=O)O)[nH]1
COc1ccccc1-c1ccc(SCC(=O)NC2CCCCC2)nn1
O=C(CSc1ccccc1)N1CC[C@](O)(C(F)(F)F)C1
CC(=N)NCc1cccc(CNC(=O)[C@@H](N)CCCCN)c1
CN1C(=O)C=C[C@@]2(C)C1CC[C@@H]1[C@@H]2CC[C@]2(C)[C@@H](C(=O)Sc3ccccn3)CC[C@@H]12
O=C(CNC(=O)c1cccc(Br)c1)N/N=C/c1cccs1
CCc1nnc([C@@H]2CN(C/C(C)=C\c3ccccc3)CCO2)o1
CC(C)[C@@H](C(=O)Nc1ccc2c(c1)OCO2)N(Cc1ccc(F)cc1)C(=O)Cn1nnc2ccccc21
Cc1ccc(OCC(=O)O[C@@H](C)C(=O)Nc2cc(C)on2)cc1
COc1ccc(Br)cc1CN1CCCC(C(=O)N2CCCCCC2)C1
O=C(NCCc1ccccc1F)Nc1ccccc1C(F)(F)F
OC[C@@H]1Nc2ccc(-c3ccccc3)cc2[C@H]2[C@@H]1CCN2Cc1ccc(F)cc1
CCOc1ccc(-n2cc(-c3ccccc3)c3c(NCc4ccccc4)ncnc32)cc1
COc1ccc(F)cc1C(=O)N(C)[C@@H]1CC[C@@H](O)[C@@H]1O
O=C1C(=O)N(CC(=O)N(Cc2ccccc2)[C@H](C(=O)Nc2ccc3c(c2)OCO3)c2ccc(F)cc2)c2ccccc21
CC(C)c1ccc(OCCNC(=O)CN2CCN(C)CC2C)cc1
COc1ccc2c(OC(C)C)cc3nc(C(=O)O)cn3c2c1
Cc1ccc(CNC(=O)c2ccc(Cl)c(NS(=O)(=O)c3ccc(F)cc3)c2)n1C
Nc1nc(N)c2cc(Sc3ccc4ccccc4c3)ccc2n1
COC(=O)/C=C/c1cccc(N(Cc2ccc(-c3cccc(C)c3)cc2)C(=O)C2CCCCC2)c1
C#CCOc1ccc([C@@H]2CC(=O)Nc3c2c(C)nn3-c2nncc(-c3ccccc3)n2)cc1
N=C(N)c1ccc(-c2cc3cc(C(=N)N)ccc3o2)cc1
CCOC(=O)c1c[nH]c(-c2ccccc2)n1
COc1cc([C@@H](CO)[C@H](OC)c2ccc(O[C@@H](CO)[C@H](O)c3ccc(O)c(OC)c3)c(OC)c2)ccc1O
COC(=O)C(Cc1ccc(NS(=O)(=O)O)cc1)(Cc1cccc(OC)c1)C(=O)OC
CC(C)C(=O)N1CCCC(c2cncc(Oc3cccnc3)n2)C1
CCCCC(=O)NC(=S)Nc1ccc2oc(-c3ccc(O)c(Br)c3)nc2c1
Cn1nc(-c2ccc(F)cc2)c(-c2ccc3nc(NC(=O)c4ccncc4)cn3n2)c1N1CCN(C(=O)c2ccon2)CC1
CCC1(O)CC(O)c2c(O)c3c(c(O)c2C1C(=O)OC)C(=O)c1cccc(O)c1C3=O
COCCCCNC(=O)CCCN(C)C
Cc1ccc2c(Cn3cc(COc4ccc(OCc5cn(Cc6cc(=O)oc7cc(C)ccc67)nn5)cc4)nn3)cc(=O)oc2c1
Cc1cc(OC[C@@H](O)CN2C[C@H](C)O[C@H](C)C2)cc(C)c1Cl
O=C(NCCSCc1ccccc1Cl)/C(=C/c1ccccc1Cl)c1ccccc1
CSCC[C@H](NC(=O)c1ccco1)C(=O)NCc1ccccc1OCCN1CCOCC1
N#C/C(=C/NC(=S)NCc1ccccc1)C(N)=O
Cc1ccc(CN[C@@H]2CCCC[C@@H]2NC(=O)CNC(=O)c2cccc(C(F)(F)F)c2)c(C)c1
CC1=C(C(=O)Nc2ccccc2)C2(CCCCC2)C(C#N)=C(SCC(N)=O)N1
CCc1nccn1CCC(=O)NCc1cn2c(n1)SCC2
Cc1ccc(Cc2c(O[C@@H]3O[C@H](CO)[C@@H](O)[C@H](O)[C@H]3O)n[nH]c2C(C)C)cc1
CCc1cnc(CN(C)C2CCN(CCc3cccs3)C2)o1
O=C(O)[C@@H]1CCCC[C@H]1C(=O)Nc1nc(-c2ccc(-c3ccccc3)cc2)cs1
CNC1CCC(N2CCc3cc(NC(=N)c4cccs4)ccc32)CC1
CC1CCN(S(=O)(=O)c2ccc3[nH]cc(C(=O)N(C)C4CCCCC4)c(=O)c3c2)CC1
Nc1ncc(Cl)nc1CNC(=S)Nc1ccc(Cl)c(Cl)c1
CCC[C@](C)(NC(=O)c1cn(C)c2ccccc12)C(=O)O
COc1cccc(Nc2c3c(nc4c(-c5ccccc5)c(C)nn24)CCC3)c1
CN(C[C@@H](O)c1ccc(Cl)c(Cl)c1)C(=O)Nc1ccc(CNC(=O)C(C)(C)C)cc1
O=C(NCc1ccccc1Cl)[C@H]1CCCN(c2ccc(=O)n(-c3cccc(F)c3)n2)C1
CCOCC(=O)N1CCC2(CC1)Cc1ncc(-c3ccc(OC)cc3)n1C2
O=C(COc1ccc(/C=C2\C(=O)NC(=O)N(c3ccc(O)cc3)C2=O)cc1Br)Nc1ccc(Cl)cc1
CCCCc1ccc2cccc(S(=O)(=O)O)c2c1
CCCCNC(=O)[C@H](C)N(Cc1ccc(Cl)cc1Cl)C(=O)COc1cc(C)cc(C)c1C
Fc1cc(Br)ccc1NC(=S)NCCSCc1ccccc1
COC(=O)N1CCN(c2ccc(C)c(C)c2)CC1
CCc1nc(CN2CCN(C(=O)c3cnc(C)nc3C(C)C)CC2)no1
CCCC(Nc1cncc(-c2ccc(O)c(OC)c2)n1)c1ccccc1
O=c1[nH]c2ccc(Cl)cc2c(-c2ccccc2)c1C1=NN(C(=S)Nc2ccccc2)[C@@H](c2ccc(Cl)cc2)C1
C[C@@H](N)Cc1c[nH]c2ccccc12
CCCC[C@H](CN(O)C=O)C(=O)N[C@H](c1nc(C(=O)Nc2ccc(F)c(F)c2)co1)C(C)C
Cc1ccc(-c2cc(C(=O)NC34CC5CC(CC(C5)C3)C4)c(=O)n(C3CCCC3)n2)cc1Cl
C[C@H](C(=O)Nc1ccc2[nH]c(=O)[nH]c2c1)N1CCC2(CCOCC2)CC1
CCCCCCNC(=O)Nc1ccc(OCC(O)CNC(C)(C)C)c(C)c1
CCN(CC(=O)Nc1ccccc1)S(=O)(=O)c1ccc(OC)c(C)c1
CC(=O)Nc1cc(-c2ccc(S(C)(=O)=O)cc2)n(-c2ccc(F)cc2)n1
CCc1nc([C@@H]2CCCN2c2nc(C)nc3c2cnn3C)no1
c1cc(C2=NCCN2)cc(-c2cc3ccc(C4=NCCN4)cc3o2)c1
Cc1ccccc1-c1cc2[nH]c3ccc(O)cc3c2c2c1C(=O)NC2=O
CC[C@H](C)c1ccc(OCC(=O)Nc2ccc(Cl)c(-c3nc4cc(C)ccc4o3)c2)cc1
Cc1cccc(NC(=O)c2cnc(C3CCCNC3)cn2)n1
Cc1cccc(-c2nnc(SCC(=O)Nc3cc(C(F)(F)F)ccc3Cl)n2-c2ccc(Cl)cc2)c1
CCn1c2ccccc2c2ccncc21
C/C=C(\CC)c1c(Cl)[nH]c(=O)[nH]c1=O
CCOC(=O)/C(=C\Nc1ccc(C)cc1)C(=O)c1ccccc1Cl
Cc1cccc(C)c1N=C(S)N1CCCCCC1
CS(=O)(=O)[C@@H]1[C@H](c2cccc(Cl)c2)[C@@]1(N)CN
O=C([C@@H]1CCCN1S(=O)(=O)c1ccc(Cl)cc1)N1CCCC1
Cc1ccc(-c2cnc3n2C2(CCN(C(=O)c4ccccn4)CC2)COC3)cc1
Cc1noc(C)c1CSc1ncccc1C(=O)N(C)CCCn1ccnc1C
Cc1cc(C)cc(OCC(=O)N(Cc2c(Cl)cccc2Cl)[C@@H](C)C(=O)NC(C)(C)C)c1
CNc1ccccc1C(=O)N(C)CCc1ccccc1
CC(C)(C#N)c1cc(Cn2cncn2)cc(-c2ccc(OS(N)(=O)=O)c(Cl)c2)c1
O=C(CCn1c(=S)[nH]c2cc3c(cc2c1=O)OCO3)N1CCN(c2ccc(Cl)cc2)CC1
CN(C)c1ccc2[nH]c(=O)c3sc4ccccc4c3c2c1
CCc1nc(CN2CCC[C@@H](N(C)Cc3cnn(C)c3)C2)no1
COc1ccc(-c2nnc(SCc3ccc([N+](=O)[O-])cc3)n2-c2ccccc2)cc1
Cc1cc(C2=NOC(c3cc(Cl)c(F)c(Cl)c3)(C(F)(F)F)C2)ccc1C(=O)NCc1ccc2c(c1)C(C)(C)OB2O
CCN(CC)CC(=O)N(CC)c1nc2cc3nc(N(CC)C(=O)CN(CC)CC)sc3cc2s1
COc1ccc2cc(S(=O)(=O)N(C)Cc3nc(-c4ccc(Cl)cc4)no3)ccc2c1
O[C@@]1(c2ccccc2)C[N+]2=C(CCCCC2)N1c1ccccc1
COc1ccc([C@@H]2CN(C(=O)C3CC3)C[C@@H]2C(=O)NCc2ccc(F)cc2)cc1
CC[C@@H](CN(C)S(=O)(=O)C1CC1)N1C(=O)[C@@](C)(CC(=O)NO)C[C@H](c2cccc(Cl)c2)[C@H]1c1ccc(Cl)cc1
CCOc1ncccc1-c1csc(NC(=O)Cc2ccc(S(=O)(=O)CC)cc2)c1
COCCOc1cc2ncnc(NC3=CC(=O)C(OC(CF)CF)=C(Cl)C3=O)c2cc1OC
Cc1nn(C)cc1[C@@H]1SCC(O)=Nc2c1c(C)nn2[C@H]1CCS(=O)(=O)C1
Cc1c(C(=O)NC[C@H](c2ccc(F)cc2)N2CCOCC2)[nH]c2c1C(=O)CCC2
CCCC[C@H](CC)C(=O)Nc1nnc(Cc2ccc(Cl)cc2)s1
Cc1ccc2cccc(OCc3c(Cl)ccc(S(=O)(=O)NC(C)(C)C(=O)NCCCNCc4ccccc4)c3Cl)c2n1
Cc1nn(C)cc1-c1cc(C(=O)Nc2ccc(Oc3ccc(F)cc3)cc2)n[nH]1
Cc1nn(C)c(C)c1CNCc1ncc[nH]1
COC(=O)[C@]1(Cc2ccccc2)N[C@H](CN(C)S(=O)(=O)c2ccc(C(C)(C)C)cc2)[C@@H]2C(=O)N(Cc3ccccc3)C(=O)[C@@H]21
CCNC(=O)[C@H](CC)N(Cc1cccc(OC)c1)C(=O)Cc1ccccc1
O=[N+]([O-])c1cn(CC(OCc2cc(F)ccc2F)c2ccc(Cl)cc2Cl)cn1
COc1ccc(-c2sc(N)nc2-c2cc(OC)c(OC)c(OC)c2)cc1N
N#Cc1cc2cc(CN3CCC(Nc4ncnc5sc(CC(F)(F)F)cc45)CC3)ccc2[nH]1
CCOCCCNC(=O)c1c[nH]cc1-c1cnn(-c2ccccc2)c1
CC(=O)O[C@H]1C[C@@H]2[C@@]3(C)CCCC(C)(C)[C@@H]3CC[C@@]2(C)[C@@H]2C[C@H](O)[C@H]3[C@H](C)O[C@@H](O)[C@@H]3[C@@]12C
Cc1nc2ccccc2n1Cc1ccc(C(=O)N2CC[C@H](N3CCCC3)C2)cc1
C[C@@H](CO)N1C[C@@H](C)[C@H](CN(C)S(=O)(=O)c2ccc(Cl)cc2)Oc2c(NC(=O)Nc3ccc(F)cc3)cccc2C1=O
CC(C)(C)C(=O)NCCOCc1ccccc1
N#Cc1ccc(CN2CCC3(CC2)c2[nH]cnc2CCN3C(=O)C2CC2)cc1
CCC1C(=O)N(C2CCN(CCCCc3ccc(-c4ccccc4)cc3)CC2)c2ccccc21
c1ccc2c(CCCCN3CCN(C4CCCCC4)CC3)cccc2c1
C=CC(=O)Oc1ccccc1Nc1nc(Nc2ccc(N3CCN(C)CC3)cc2OC)ncc1Cl
CCCCCCCCNC(=O)NC(C)C
CCc1ccc(CNC(=O)c2ccc3c(c2)NC(=O)C(N2CCOCC2)S3)cc1
O=C(CCc1c[nH]c2ccccc12)OCc1cccc([N+](=O)[O-])c1
N#Cc1nc(-c2ccco2)oc1NCCc1ccccc1
O=C(Nc1ccc(OCc2cc(C(=O)NC[C@H]3CCCO3)no2)cc1)c1ccccc1
CN(c1ccc(F)c(F)c1)S(=O)(=O)c1ccc(Cl)cc1
C[C@H](NC(=O)CCn1ccc2c(Cl)cccc21)C(=O)O
CCc1nn(CC(=O)N2CCN(c3cccc(C(F)(F)F)c3)CC2)c(=O)c2cc3occc3n12
C[C@H](CC(=O)N1CCC([C@@H]2Nc3ccccc3S(=O)(=O)N2)CC1)n1ccnc1
CC[C@H](C)NC(=O)CN1C(=O)CS[C@@H](c2ccccc2F)c2c(-c3ccccc3)nn(-c3ccccc3Cl)c21
COc1ccc(CNC(=O)c2c(C)[n+]([O-])c3ccc(F)cc3[n+]2[O-])cc1
CC(=O)Oc1ccc(C(=O)[C@H]2[C@H]3C(=O)N(c4ccc(Br)cc4)C(=O)[C@@H]3[C@H]3C=CC=NN32)cc1
Cc1cc(C)n(C[C@@H](C)N2CCN(C)C3(CCN(C)CC3)C2)n1
Cc1cc2c(s1)CN(C)CC2c1c(Cl)cccc1Cl
O=C(Nc1ccc(F)cc1)[C@@H](c1ccccc1)N1CCN(C(=O)c2cccs2)CC1
C[n+]1c(-c2ccc(/C=N/NC(=O)c3ccc(N)cc3)cc2)cn2ccccc21
CC(=O)C1=C(C)OC(N)=C(C#N)C1c1cc2cccc(C)c2nc1Cl
CCOc1ccc([C@@H](c2c(O)cc(C)n(Cc3ccco3)c2=O)N2CCN(c3ccccc3)CC2)cc1
Cc1c(N2C(=O)/C(=C/c3cccc([N+](=O)[O-])c3)SC2=S)c(=O)n(-c2ccccc2)n1C
O=C(NCCn1nc(-c2ccco2)ccc1=O)c1ccc(OCC2CCOCC2)nc1
Nn1c(SCc2csc(-c3ccc(F)cc3)n2)nnc1-c1ccco1
Cc1ccc(CNC(=S)Nc2ncc(C)cc2Br)cc1
CC(C)(C)c1ccc(OCCNC(=O)Cn2ncc(=O)c3ccccc32)cc1
CN1N=C(C(F)(F)F)CC1(C)C(=O)Nc1ccc(C#N)c(C(F)(F)F)c1
O=C(c1ccco1)N1CCC[C@]2(CCN(Cc3cccc(F)c3)C2=O)C1
Nc1ccc2cc(S(=O)(=O)O)cc(O)c2c1N=Nc1ccc(-c2ccc(N=Nc3c(S(=O)(=O)O)cc4cc(S(=O)(=O)O)c(N=Nc5ccc([N+](=O)[O-])cc5)c(N)c4c3O)cc2)cc1
CCOc1cc(/C=C2/S/C(=N\c3ccc(F)cc3)NC2=O)ccc1OCc1ccccc1
COC(=O)c1sc(-c2ccccc2)cc1NC(=O)COc1ccccc1
CC(C)(C)c1ccc(C2=N/C(=C\c3cccc(OC(=O)c4ccccc4F)c3)C(=O)O2)cc1
CC(=O)C1(/N=N/c2cccc(C)c2)N=C1C
O=c1cc(CCc2ccccc2)oc2cccc(O)c12
CC[C@@H](C)/C=C(C)/C=C/C(=O)c1c(O)c(-c2ccc(O)cc2)c[nH]c1=O
Fc1ccccc1COc1ccccc1C1CCNCC1
C[C@H](OC(=O)C[C@H]1CSCCS1)C(=O)Nc1ccc2ccccc2c1
CCNCc1cccc(Oc2cc(N3CCN(Cc4ccccc4-c4ccc(Cl)cc4)CC3)ccc2C(=O)NS(=O)(=O)c2ccc(NCC3CCOCC3)c([N+](=O)[O-])c2)c1
COc1ccc(-c2nc(C(=O)N3CCC[C@H](c4nc5ccccc5s4)C3)cs2)cc1
COc1ccc(COC(=O)C2CCN(S(=O)(=O)c3cccs3)CC2)cc1
CN(CC(=O)NCc1ccc(Cl)cc1)S(=O)(=O)c1cccc2nsnc12
Nc1ncn([C@@H]2O[C@H](COP(=O)(O)OP(=O)(O)OP(=O)(O)O)[C@@H](O)[C@H]2O)c(=O)n1
CC(CCc1ccc(OCc2nc(-c3cc(F)cc(F)c3)no2)cc1)(C(=O)NO)S(C)(=O)=O
Cc1nnc(C(=O)NC(C)(C)c2nc(C(=O)NCc3ccc(F)cc3)c(OC(=O)c3ccccc3)c(=O)n2C)o1
CC1(C)CCc2cc(C(=O)/C=C/c3ccc(O)cc3)c(O)cc2O1
O=C(Nc1nnc(S)s1)N[C@@H](Cc1ccccc1)C(=O)NCc1ccccc1
COC(=O)[C@H](Cc1ccccc1)N(C)S(=O)(=O)c1cccc(S(=O)(=O)N(C)[C@@H](Cc2ccccc2)C(=O)OC)c1
CS(=O)(=O)Nc1ccc(C(=O)CSc2nc3ccccc3n2CCC#N)cc1
Cc1cc([C@@H]2[C@@H](c3ccccn3)NC(=S)N2c2ccc(O)cc2)c(C)n1-c1ccccc1Cl
NCc1ccccc1CN(Cc1nc2ccccc2[nH]1)C1CCCc2cccnc21
C[C@@H](NC(=O)c1ccc(F)cc1F)c1nnc2n1CCCCC2
CC1=NN(c2ccccc2)C(=O)/C1=C/N1CCN(/C=C2/C(=O)N(c3ccccc3)N=C2C)CC1
COc1ccc2[nH]cc(C3=CCN(CCN4C(=O)NC(C)(C)C4=O)CC3)c2c1
Cc1cc(OC(=O)c2cccnc2)n(-c2ccccc2)n1
CCn1cc(/C=C2/SC(N3CCc4ccccc4C3)=NC2=O)cn1
CC(C)Cn1ccc2c(NC(=O)Cn3nc(-c4cccs4)ccc3=O)cccc21
O=C(c1cnccn1)N1CC[C@H]2[C@@H]1CCC(=O)N2c1cccnc1
CC(=O)c1ccc(O[C@@H](C)C(=O)Nc2ccc(-c3nccs3)cc2)cc1
Cc1c(C(=O)NC[C@@H]2COCCO2)cnn1-c1ncc2c(n1)-c1ccccc1CCC2
C[C@@H]1O[C@@H](O[C@H]2CC[C@]3(C=O)[C@H]4CC[C@]5(C)[C@@H](C6=CC(=O)OC6)CC[C@]5(O)[C@@H]4CC[C@]3(O)C2)[C@H](O)[C@@H](O)[C@@H]1O
Cc1cnn(C[C@@H]2CCCN2C(=O)C2CCC(n3cccc3)CC2)c1
O[C@H](COc1ccc(-c2ccccc2)cc1)CN1CCC(Cc2ccccc2)CC1
C=CCc1cccc2cc(C(=O)NCc3cccnc3)c(=O)oc12
Cc1cc(=O)c(-c2c(-c3ccc(O)cc3)oc3cc(C)oc(=O)c23)c(O)o1
O=C(O)CCCCCCCOc1ccc(NC(=O)c2c(O)nc3ccc(-c4cc5ccccc5s4)cc3c2O)cc1
COc1cccc(-c2nc3n(n2)C(c2ccccc2Cl)C(C(N)=O)=C(C)N3)c1
CCC(=O)NC(=S)Nc1ccc(CN2CCCC2)cc1
Cc1cccnc1-c1ccc2c(c1)CC[C@@H](C)N2C(=O)c1ccc(O)cc1O
COCc1c(OCc2ccc(-c3ccccc3-c3nn[nH]n3)cc2)cc(C)nc1C
CCCC(=O)OCC(=O)Nc1ccc(OC(F)F)cc1
CC(C)Oc1ccc(-c2nc(-c3cccc4c3CC[C@@H]4NC(=O)N3CC[C@H](O)C3)no2)cc1C#N
CCn1c(NC(=O)c2csc(C(F)(F)F)n2)nc2ccccc21
CC(C)(C)c1ccc(C(Cc2ccc(C(=O)NCCC(=O)O)cc2)C(=O)Nc2ccc(CO)cc2)cc1
C[C@H]1C[C@@]2(C)Oc3ccccc3C[C@H]2[C@H](C)[C@@H]1CNCCCN(C)C
C[C@@H](OCCCNc1ccc(S(C)(=O)=O)cc1[N+](=O)[O-])c1ccccc1
C[C@@H]1C[C@H]2O[C@@H]2/C=C\C=C\[C@H](O)Cc2c(Cl)c(O)cc(O)c2C(=O)O1
CC[C@H](C[C@@H](O)[C@@H](C)[C@H]1CC[C@H]2[C@@H]3[C@H](O)C=C4C[C@@H](O)CC[C@]4(C)[C@H]3CC[C@@]21C)C(C)C
Cc1c(OCc2ccccc2-c2ccccc2)ccc2c(N3CCNCC3)cc(=O)oc12
CN1C[C@@H](C(=O)Nc2cccc(F)c2)C[C@@H]1C1CCN(Cc2cccnc2)CC1
CS(=O)(=O)c1ccc(Cl)c(S(=O)(=O)N[C@H]2CCC[C@@H]2CN)c1
COc1ccc2c(c1)C(=O)c1ccc(Oc3ccc(F)cc3F)cc1CC2
Cc1nc(NC(=O)[C@@H]2[C@H]3C=C[C@@H](O3)[C@@H]2C(=O)O)sc1C
COc1ccc2ccc(OC)c(CCNC(C)=O)c2c1
O=C(O)c1ccc(/N=C/c2cc(Br)c(Sc3ccc(Cl)cc3)o2)cc1
CCNc1cccc(N2CCN(C(=O)c3ccc4[nH]ccc4c3)CC2)n1
COC(=O)c1ccc2c(O)nc(COC(=O)c3[nH]c(C)c(C(C)=O)c3C)nc2c1
Cc1ccc(NC(=O)CSc2cc(N3C[C@@H](C)C[C@@H](C)C3)ncn2)c(F)c1
COc1ccc(NC(=S)NC(=O)c2csnn2)cc1
C[C@H]1COc2ccc(C#C[C@@](C)(O)c3ncccn3)cc2-c2nc(C(N)=O)sc21
Cc1ccc(NC(=O)c2cccc(C(=O)OC(C)C)n2)c(Br)c1
CCCCCCNC1=NS(=O)(=O)c2sc(Cl)cc2N1
OC1(Cc2ccc3c(c2)OCO3)c2ccccc2C2=NCCCN21
O=C(NNC(=S)NC(=O)c1cccnc1)c1ccc(F)cc1
O=C1C[C@@H](c2noc(-c3ccccc3F)n2)CN1c1ccc(F)cc1
COc1cc(N2CCCCCC2)nc(NC(=S)NCC2(c3ccccc3)CCCCC2)n1
CCc1ccc(-n2nnc(-c3nc(-c4ccccc4)no3)c2C)cc1
C[C@@]1(C2CC2)NC(=O)N(CC(=O)Nc2ccc(OC(F)F)cc2)C1=O
Cc1nc(C(Cl)(Cl)Cl)ncc1C(=O)O
COc1ccc(C(=O)N[C@H](C)CCc2ccccc2)cc1CN(C)S(=O)(=O)c1ccc(Cl)cc1
O=C1CS/C(=N\N=C\c2ccc([N+](=O)[O-])s2)N1
CCN(CC)CCNC(=O)c1ccc(CSc2nc3ccncc3n2Cc2ccccc2F)cc1
Cc1ccn([C@@H](C)CC(=O)Nc2ccc(OC(F)(F)F)cc2)n1
Cc1oc(-c2ccc(Cl)cc2)nc1C(=O)N1CCCN(C)c2nc3ccccc3nc21
CN(C)C(=O)[C@@H]1C[C@@H](Oc2ccncc2)CN1Cc1cccnc1
COc1cc(C)c2nc3[nH]nc(C)c3c(C(O)c3ncco3)c2c1
OC1CCN(Cc2ccc(Br)cc2)CC1
COc1ccc(OC)c(NC(=S)N2CCN(C/C=C\c3ccccc3)CC2)c1
O=C(CC(c1ccccc1)c1ccccc1)N1CCN(Cc2cccnc2)CC1
COc1ccccc1NC(=O)CN1C(=O)N/C(=C/c2ccc(C(=O)O)cc2)C1=O
CC(C)(C)c1cc(CNC(=O)CC2=CCCC2)[nH]n1
Cc1nn(-c2ccc(F)cc2)c(Cl)c1C(=O)OCCN1C(=O)c2ccccc2S1(=O)=O
O=C(O)c1ccc(-c2ccc(N3CCC(Oc4cc(F)ccc4Br)CC3)nn2)nc1
Cc1cc(O[C@@H](C)C(=O)N2C[C@@H]3C[C@H](C2)Cn2c3cccc2=O)c2c(C)cc(=O)oc2c1
Cc1ccc(C(=O)N(CC2CC2)C[C@@H]2CN(C[C@H](O)COc3ccccc3)CCO2)cc1
CC1=C[C@]2(C(C)(C)O)C[C@]3(OC2=O)[C@@H](C)CC[C@@H]13
C=C(C)[C@@H]1CC[C@]2(C)[C@@H](O)C[C@]3(C)[C@H](CC[C@@H]4[C@@]5(C)CC[C@H](OC(=O)/C=C/c6ccc(O)cc6)C(C)(C)[C@@H]5CC[C@]43C)[C@@H]12
CNS(=O)(=O)c1cc(C(=O)Nc2ccc3sc(C(=O)OC)cc3c2)ccc1OC
CCCCn1c(=O)c2c(nc3n2CCCN3c2ccccc2)n(C)c1=O
COc1ccc(-c2cnc(C(=O)N3CCN(c4cc5ccccc5cc4C(=O)O)CC3)nc2-c2ccc(C)cc2)cc1
COc1ccc(NC(=O)c2ccc(N(CCCl)CCCl)cc2)cc1
COC(=O)c1ccc2c(c1)N[P@](=O)(c1ccccc1)N2
N=C(N)NCCC[C@H](NC(=O)CCCNC(=O)NC12CC3CC(CC(C3)C1)C2)C(=O)O
COc1cc(Cl)c(C)cc1NC(=O)[C@H](C)n1cccn1
Cc1ccccc1COc1ccc(-c2nncs2)cc1
Cc1ccc(/C(=N/O)Nc2ccc(C(C)C)cc2)c(OCc2ccccn2)n1
Cc1c(Cl)ccc2c1NC(=O)[C@@]21[C@@H]2C(=O)N(c3ccc(F)c(Cl)c3)C(=O)[C@@H]2[C@@H]2CCCN21
Nc1nc(O)c2c(n1)NCCN2C(=O)c1ccccc1
COc1cccc(NC(=O)N2CCC(c3nc(-c4ccc(Cl)cc4)no3)CC2)c1
CC(C)(NC[C@@H](O)[C@H](Cc1ccccc1)NC(=O)C1CCCC1)c1ccccc1
COc1ccc2cc(-c3nc4cccc(C)n4c3NC3CCCC3)c(=O)[nH]c2c1
Cc1ccc(F)c(NC(=O)Nc2ccc(Oc3ccnc(-c4cc(C(=O)NCC(=O)O)c[nH]4)c3)cc2)c1
CC[C@@]1(OC(=O)[C@H](NC(=O)[C@H](CCCCN)/N=C(\S)Nc2ccc(O[C@H]3O[C@@H](C)[C@@H](O)[C@@H](OC)[C@@H]3O)cc2)C(C)C)C(=O)OCc2c1cc1n(c2=O)Cc2cc3ccccc3nc2-1
O=C(COc1ccc2ccccc2c1)N1N=C2/C(=C\c3ccc([N+](=O)[O-])cc3)CCC[C@@H]2[C@@H]1c1ccc([N+](=O)[O-])cc1
O=C(c1cc(F)ccc1F)N1CCC(CCOc2ccc(F)cc2)CC1
Cc1nc(-c2cccnc2)sc1C(=O)N/N=C/c1ccccc1Cl
Cc1[nH]nc(CCC(=O)N2CCC[C@@H](C(=O)c3nccn3C)C2)c1C
COc1ccc(NC(=O)N2CCCCN3[C@@H](CO)[C@H](c4ccc(C#CCC(C)C)cc4)[C@@H]3C2)cc1
N/C(=N\N=C/c1ccc(-c2ccc(O)c(C(=O)O)c2)o1)N[N+](=O)[O-]
COc1ccc(N(CC(=O)NCc2ccco2)C(=O)CCC(=O)Nc2nccs2)cc1
C[C@H]([C@@H](O)c1ccccc1)N(C)S(=O)(=O)c1cccs1
CCOCCCNCc1cccc(Br)c1
O=C1N=C(N2CCC[C@H]2C(=O)Nc2ccc3ncnc(Nc4cccc(Cl)c4)c3c2)S/C1=C/c1cccc(Br)n1
CC(C)=CCc1cc([C@H]2CC(=O)c3ccc(O)cc3O2)ccc1O
CCSCCNC(=O)C(c1cccc(F)c1)N(C)C
O=C(CSc1nc2ncccc2[nH]1)Nc1ccc(F)cc1
Cc1cc(C)cc(NC(=O)CSc2nc3nccnc3c(=O)n2CCc2c[nH]c3ccccc23)c1
Nc1ccc(-c2cn3c(n2)SCC3)cc1
NC(=S)Nc1nn2c(=O)[nH]c(=S)[nH]c2c1Cc1ccc(Br)cc1
O=C(/C=C\c1cccnc1)c1cc(F)c(Cl)cc1Cl
COc1ccc(CNC(=O)CCCn2nc(C)c3c(C)n(-c4ccc(C)cc4)nc3c2=O)cc1
COc1ccc2c(c1)OC1(CCN(Cc3ccccc3C)CC1)CC2=O
COc1ccc(S(=O)(=O)N(CC(=O)NCCCO)C2CCCCC2)cc1OC
C=C1[C@H](O)[C@@H](CO)O[C@H]1n1ccc(NC(=O)O[C@@H](C)[C@@H](NC(=O)[C@@H](N)Cc2ccc(-c3ccccc3)cc2)C(=O)O)nc1=O
COc1cc(-c2nnc(SCC(=O)c3ccc(Cl)cc3)n2N2C(=O)c3ccccc3C2=O)cc(OC)c1OC
COc1nc(C(=O)C2CC2C(=O)O)ncc1N(CC1CC1)c1ccc(Cl)c2ccccc12
Nc1c[nH]nc1-c1nccs1
COc1cccc2c1CNC(C)(C)C2
Fc1ccc(/C=C/c2ccc(F)cc2F)cc1
S=C1N[C@@H](c2ccccn2)[C@H](c2ccc(-c3ccc(Br)cc3)o2)N1c1ccc(OC2CCCC2)cc1
CC[C@@H](C)NC(=O)CSc1nnc2c3cc(-c4ccc(Cl)cc4)nn3ccn12
COC(=O)c1ccccc1NC(=O)Nc1cccs1
COc1ccc(-c2ccc3ncc4c(c3c2)n(C2CCN(C(C)=O)CC2)c(=O)n4C)cn1
CO[C@@H](C(=O)N1CCN(Cc2cccc(-c3noc(-c4cccc(C(F)(F)F)c4)n3)c2)CC1)c1ccccc1
O=C(CN(C(=O)CCC(=O)Nc1nccs1)C1CCCCC1)NCc1ccc(F)cc1
COc1ccc(S(=O)(=O)N[C@@H](C)c2ccncc2)cc1Cl
CC1=C(C(N)=O)C(c2cccc(OC(F)(F)F)c2)n2nc(SCc3ccccc3)nc2N1
CNC(=O)[C@H]1CCCN(C(=O)NC[C@H](C)Cc2cccs2)C1
Cc1cccc(C(=O)NCc2ccc(Cn3cccn3)cc2)c1
CCCCOC(=O)NS(=O)(=O)c1ccc(OC(C)C)cc1-c1ccc(Cn2ccnc2)cc1
Cc1ccc(-c2cc3c(N4CCC(C(=O)NCc5ccccc5Cl)CC4)nccn3n2)cc1C
O=C1NC(=O)/C(=C/c2cnn3c(NC4CC4)cc(-c4ccc(C(=O)N5CCCC(O)C5)s4)nc23)N1
Cc1cccc(COc2ccc(C(C)N)cc2)c1
CC(=O)c1ccc(N2CCOc3c(O)cc(-c4nc(C)cnc4C)cc3C2)nc1
C[C@]1(Cc2ccc3c(c2)OCO3)CCC(=O)N(CCOCCO)C1
Cc1ccc(NC(=O)CSc2nnc(CCC(=O)O)c(=O)[nH]2)cc1
O=C(NCC(=O)N1CCC(c2noc(-c3ccccc3)n2)CC1)c1ccco1
CCOc1cc(N)ccc1NC(=O)CC
C[C@H](Nc1nccc(N2C(=O)OC[C@@H]2[C@@H](C)N)n1)c1cnc(-c2ccc(Cl)cc2)s1
CNC(=O)[C@@H](NC(=O)[C@H](CC(C)C)[C@H](NS(=O)(=O)c1cccnc1)C(=O)NO)C(C)(C)C
N#CCc1cnn2c(NCc3cccnc3)cc(-c3ccccc3)nc12
COc1cc(C(=O)Nc2ccc(S(N)(=O)=O)cc2)on1
COc1cccc(Oc2ccc(C=O)o2)c1
CCc1noc([C@H](C)N2CCN(C(=O)N[C@@H]3CCO[C@@H]3C)CC2)n1
CC[C@H](C)[C@](C)(N)CC(=O)O
CCc1n[nH]c(O)c1Cc1ccc2ccccc2c1
c1cnc(O[C@H]2CCN(c3nccc4ccccc34)C2)c(C2CCOCC2)c1
CCOc1ccc(NC(=O)CSc2nnc(-c3ccco3)n2Cc2ccco2)cc1
Cc1csc(-c2nc(C(F)(F)F)cn2-c2ccc(S(N)(=O)=O)cc2)n1
CC(=O)Nc1ccc(N2C(=O)c3ccc(Oc4cccc(NC(C)=O)c4)cc3C2=O)cc1
CO[C@@H]1C/C=C/[C@H](C)[C@@H]2O[C@](O)([C@H](C)C(=O)O[C@H](c3ccccc3)CCCC1)[C@H](OC)[C@@H](O)[C@@H]2C
COc1ccc(/C=C\C(=O)c2cn(C)nc2C)c(OC)c1OC
CC[C@@H](N[C@H](C)CC(N)=O)c1ccc(C)c(C(=O)c2ccccc2)c1F
COc1cc(NC(C)CCCNC(=O)Nc2ccc(F)cc2)c2ncccc2c1
CO/N=C(\C)c1ccc(-n2ccnc2)c(NC(=O)c2cnc(-c3ccccc3)s2)c1
COC(=O)C1=C(C)N(CC2CCCO2)C(=O)C1
CN(C(=O)CSc1ncnc2scc(-c3ccccc3)c12)C1CCS(=O)(=O)C1
Cn1c2ccccc2c2nnc(SCC(=O)Nc3ccc([N+](=O)[O-])cc3)nc21
CC(C)(O)c1ccccc1CC[C@@H](SCC1(CC(=O)O)CC1)c1cccc(/C=C/c2nc3cc(C(F)(F)F)ccc3s2)c1
C[C@H]1C[C@@H]2[C@H](CC[C@]3(C)C(=O)CC[C@@H]23)c2ccc(O)cc21
C=CC(=O)N[C@H]1CCN(c2ccc(C(N)=O)c(Nc3ccc(CCN4CCCC4)cc3)n2)C1
CCOC(=O)c1cc2cc(NC(=O)N3CCN(c4cnccn4)CC3)ccc2s1
COc1ccc([C@@H]2c3[nH]c4ccccc4c3C[C@@H]3C(=O)N(Cc4ccccc4)C(=O)N32)cc1
CC(=O)NCc1ccc(-c2csc(-c3cccc(F)c3)n2)s1
COc1ccc(CC(=O)N2CC[C@H]3CC(=O)N(CCc4cccc(OC)c4OC)CC[C@H]3C2)cc1
CCc1ccccc1NC(=O)CNC(=O)CCc1nnc(-c2ccccc2)o1
N#Cc1ccccc1N=Cc1ccc(Br)cc1
CCCCC(CC)CNC(=O)C(=O)c1ccccc1NC(C)=O
Fc1ccc(CN2CC[C@H]3C[C@@H](c4ccncn4)O[C@@H]3C2)cc1
Cc1cccc(NC(=O)NC2N=C(C3CCCC3)c3ccccc3N(C)C2=O)c1
CCn1cc(/C=C2/Oc3c(ccc(OS(C)(=O)=O)c3C)C2=O)c2cc(OC)ccc21
O=C1Oc2ccccc2C(=O)/C1=C\c1c[nH]c2ccccc12
CC[C@H](NC(=O)c1ccn(C)c(=O)c1)c1nc(-c2ccccc2)c[nH]1
Cc1cccc(C(=O)Nc2ccc(-c3c(C)sc4ncnc(N)c34)cc2)c1
CCn1c(CN2CCC(CN3CCCCC3)CC2)nnc1[C@H]1C[C@@H](N)C1
Cc1nn(Cc2ccccc2)c(Cl)c1C(=O)OC1CCOC1=O
O=C(CN1C(=O)S/C(=C/c2ccc(OCc3ccc(Cl)cc3)cc2)C1=O)Nc1ccc(Br)c(Cl)c1
Cc1cc(N/C(=N/C(C)(C)C)Nc2cnccn2)c2ccccc2n1
N#Cc1ccc(CCC(=O)NCC2(c3ccccc3)CC2)cc1
O=C(O)c1ccc2c(=O)n3c(nc2c1)/C(=C/c1ccccc1C(F)(F)F)CCCC3
COc1cc([C@H]2C3=C(CN(C(C)=O)C3=O)Nc3cccc4c3c2cn4C(C)C)ccc1OC(C)C
CCCCNC(=O)c1oc(=O)c2ccccc2c1-c1ccc(C)cc1
Cc1cc(C(=O)NCc2cnc(Oc3ccc4c(c3)CCC(c3ccccc3)O4)s2)nc(C)n1
COc1cc(CN(Cc2cccnc2)C(=O)CC2CCCC2)ccc1O[C@H]1CCOC1
C=C1C(=O)O[C@H](c2ccccc2)[C@H]1c1ccccc1
CC(=O)Nc1ccc(C(=O)NCCNC(=O)[C@@H](C)Oc2ccc(Cl)cc2Cl)cc1
O=C([C@@H]1Cc2ccccc21)N(Cc1ccccc1)CC1CCOCC1
COCC(=O)N1CCC[C@H]1[C@@H]1CCCN1Cc1ccccc1
NC(=O)NC(=O)CCSCc1coc(-c2cccc(F)c2)n1
CCOC(=O)C1CCCN(C(=O)Cc2c(-c3ccc(Cl)cc3)nc3c(Cl)cc(Cl)cn23)C1
Clc1ccc(-c2nnc(Sc3ccccn3)n2-c2ccccc2)cc1
O=C(NNc1ccccc1Cl)c1ccc(NS(=O)(=O)c2cnc(O)nc2O)cc1
O=C(NCC(c1cccs1)N1CCOCC1)c1ccco1
N#Cc1ccc2c(c1)Oc1ccccc1S2(=O)=O
N/C(=C\C(=O)c1ccc(F)c(F)c1)C(=O)O
COCc1nc2n(n1)[C@@H](c1ccc(C(C)C)cc1)C[C@H](C)N2
CCN(C(=O)COC(=O)c1cnc(C)cn1)c1c(N)n(Cc2ccccc2)c(=O)[nH]c1=O
CC(C)c1cccc(-n2c(C(=O)O)c(Oc3cccc(O)c3)c3ccccc32)c1
COc1ccc(C(=O)N(Cc2ccncc2)Cc2cccc(OCCc3cccc(C(F)(F)F)c3)c2)cc1
Cn1cc(/C=C/C(=O)N[C@H](c2ccc(F)cc2)c2cccs2)cn1
CN1CCN(C(=O)c2cccc(Cc3n[nH]c(=O)c4c3CCCC4)c2)CC1
COCCCN(CC(=O)Nc1ccc(N2CCOCC2)cc1)S(=O)(=O)c1ccccc1
COc1cccc(NC(=O)c2cc(C)nc3onc(-c4ccc(F)cc4)c23)c1OC
C[C@@H](Oc1ccc(Cl)cc1Cl)C(=O)N1CCN(c2ccccc2)CC1
O=C(O)CC1S/C(=N\N=C2CCCCCCC2)N(c2ccccc2)C1=O
CC(C)(C)OC(=O)Nc1nccs1
COc1cc(/C=C/C(=O)O[C@H]2[C@H](O)C[C@@]3(C)[C@@H](CC[C@]4(C)[C@@H]3CC=C3[C@@H]5[C@@H](C)[C@H](C)CC[C@]5(C(=O)O)CC[C@]34C)C2(C)C)ccc1O
Cc1cc(NC(=O)[C@H]2CCCN(c3cc(-n4cncn4)ncn3)C2)no1
CCOC(=O)[C@@]1(C)CSC(c2ccc(OCCOCCOCCOC)cc2O)=N1
Cc1cnc(NC(=O)CSc2nnc(-c3cnccc3C)o2)s1
CCn1c2ccccc2c2cc(NS(=O)(=O)c3ccc(OC)c(NC(=O)c4ccc(C)cc4)c3)ccc21
CC(=O)OC(C)n1cnc2c(S)nc(F)nc21
CCN1CCCC(C#N)(c2ccccc2)CC1
COc1cc(/C=C2\SC(=O)N(CC(=O)Nc3ccc(Br)cc3)C2=O)ccc1OCc1ccc(C(=O)O)cc1
CCCCc1ccc(-n2nc3cc(Cl)c(NC(=O)COc4c(C)cc(C)cc4Cl)cc3n2)cc1
CCCOc1ccccc1CN(CC)CCCCCC(=O)N(C)CCCCCCCCN(C)C(=O)CCCCCN(CC)Cc1ccccc1OCCC
CCN1CCN(c2ccc(C(=O)NCC[C@H]3CCCCN3C)cn2)CC1
C[C@@H]1CN(S(C)(=O)=O)CC[C@@H]1NCc1cc(F)ccc1F
Cn1c(SCC(=O)Nc2ccc3c(c2)OC2(CCCCC2)O3)nnc1C1CC1
COc1ccc(C(=O)NCCc2c[nH]c3ccccc23)cc1S(=O)(=O)N1CCCC1
Cc1cc(C(F)(F)F)c2c(C)nn(CC(=O)N(C)Cc3cnn(C)c3C)c2n1
C=CCn1c(Cc2ccccc2)nnc1SCc1ccccc1C
Nc1c(C(=O)Nc2ccccc2Cl)sc2nc3c(cc12)C(=O)CCC3
Cc1cc(C(=O)NN2C(=O)[C@H]3C4C=CC(C5CC54)[C@H]3C2=O)[nH]n1
CCCCn1c(=O)c2c(nc3n2CCCN3c2ccc(OCCN(C)C)cc2)n(CCCC)c1=O
CC1=C(C(=O)NCc2ccc(Cl)cc2)C2(CCC(C)CC2)OC1=O
O=C(NC(c1ccccc1)c1ccccc1)NS(=O)(=O)c1ccc(OCCCN2CCCC2)cc1
O=C(CSc1nnc(C2CC2)n1/N=C/c1ccc(Br)cc1)N(C1CCCCC1)C1CCCCC1
CCCOc1ccc(C2NC(S)=NC(c3ccccc3)=C2C(=O)Nc2ccc(C)cc2)cc1OC
O=C(O)Cn1nc(C(F)(F)F)c2c1CCCCC2
CN1CCC23c4c5ccc(O)c4OC2C(=O)CCC3(O)C1C5
Cn1cc(C2CCCN2C(=O)c2ccc(NC3CC3)nc2)cn1
COc1cccc(C2=NOC(C(=O)Nc3ccc(C(C)=O)cc3)C2)c1
O=C(c1ccc2c(c1)sc1nc(-c3ccc(F)cc3)cn12)N1CCCCCC1
Cc1cc(N(CC(=O)NCc2ccc(CN3CCOCC3)cc2)S(C)(=O)=O)ccc1Br
O=[N+]([O-])c1cn2c(n1)OC[C@@H](OCc1ccc(-c3ccc(F)nc3)nc1)C2
COc1ccc(OC)c(N2C[C@H](C(=O)OCC(=O)c3ccc(OC(=O)c4ccc(Cl)cc4Cl)cc3)CC2=O)c1
C=CCN1C(=O)CN=C1Nc1cc(C)ccc1C
CCCc1sc(NS(=O)(=O)/C=C/c2ccc(C)cc2)nc1-c1ccc(Cl)cc1
Cc1ccc(S(=O)(=O)N=C(N)Nc2nc(C)c3cc(C)ccc3n2)cc1
COc1cc2c(c(OC)c1OC)-c1ccc(NCCCCCC(=O)Nc3ccccc3)c(=O)cc1[C@@H](NC(C)=O)CC2
CC(=O)CSc1nc2c(c(=O)[nH]1)[C@@H](c1ccc(Cl)cc1Cl)C1=C(CC(C)(C)CC1=O)N2
O=C(Cc1cn2ccccc2n1)NC[C@H]1CCCO1
CC(=O)N1CCC(Nc2nc3ccccc3o2)CC1
CCCCCc1ccc(S(=O)(=O)NCCc2c(-c3cnc4ccccc4c3)[nH]c3ccccc23)cc1
O=C(Cc1csc(-c2ccccc2Cl)n1)Nc1cccc(OC[C@H]2CCCO2)c1
COc1ccc(N2CCN(c3ncc4c(n3)CCN(Cc3cc(F)cc(F)c3)C4)CC2)cc1
CCOC(=O)c1cc2c(=O)n3ccccc3nc2n(C)/c1=N\C(=O)c1cccc(Cl)c1
CN(C)c1ccc(-c2noc(C(=O)NCCc3ccc(O)cc3)n2)cc1
Cc1cc2c(=O)n3c(nc2s1)CCN(Cc1cnn(C)c1C)CC3
CCOc1cccc(/C=N/NC(=O)c2cc(-c3ccc(CC)cc3)n[nH]2)c1O
COc1ccc2c(c1)/C(=N/Nc1ccc(Cl)cc1)C(=O)N2
CC(C)(C)n1nc(C(=O)Oc2ccc3c(c2)CCC(=O)N3)cc1C1CC1
COCCCNC(=O)N1CCN(C(=O)c2nsc3ccc(C)cc23)CC1
Oc1ccc(-c2ccc(/C=C/c3nnn[nH]3)cc2Cl)cc1C12CC3CC(CC(C3)C1)C2
CC(C)c1cccc(C2(NC[C@@H](O)[C@@H]3Cc4cccc(c4)OCCCCOc4cc(cc(N5CCCC5=O)c4)C(=O)N3)CC2)c1
Cc1ccc(N(C(=O)Nc2c(-c3c(Cl)cccc3Cl)noc2C)[S@@](C)=O)cc1
COc1cc(C2C(C#N)=C(N)N(Nc3ccccc3)C3=C2C(=O)CC(C)(C)C3)ccc1OCc1cccc(F)c1
Cc1ccc2c(CN3CCC(C(N)=O)CC3)cc(=O)oc2c1C
Cc1ccc(Cl)cc1NC(=O)C[C@H](NC(=O)c1ccccc1)c1ccccc1
COc1ccc(-c2cc(-c3ccccc3)c(C#N)c(=O)n2C2OC(CO)C(O)C(O)C2O)cc1
CN(C)S(=O)(=O)CCNC(=O)c1cc(=O)n(C)c2ccccc12
CC(O)CC(C)(C)CNC(=O)Nc1cnn(-c2ccccc2F)c1
COc1ccc(-c2nc3c(C)nc(N)nc3n([C@H]3CC[C@H](O)CC3)c2=O)cn1
CC12CCCN1c1nc3ncc(C(=O)O)c(O)c3cc1OC2
COc1ccc([C@@H]2[C@@H](CCCc3ccccc3)OC(=O)N2c2ccccc2)cc1
Cc1ccc(NCc2ccccc2OCc2cccc3ccccc23)cc1C
CCOc1ccc([C@H]2C(C(=O)OC)=CN=c3s/c(=C\c4ccccc4OCc4ccc([N+](=O)[O-])cc4)c(=O)n32)cc1OCC
COc1ccc(C(=O)[C@H]2CCCN(Cc3cc(OC)c4c(c3)OCO4)C2)c(OC)c1
Cc1ccc(N2CCN([C@H](C)C(=O)NCc3cccnc3)CC2)cc1C
CC(C)NS(=O)(=O)c1ccc(N2CCCC2)c(C(=O)O)c1
CC(C)[C@H]1COC(=O)N1c1ccnc(N[C@@H](C)c2ccc(C(=O)NC3CCCCC3)c(Cl)c2)n1
CN1CC=C(c2c[nH]c3ccc(C(=O)c4nccs4)cc23)CC1
Cc1ccc(C(C)C(=O)Oc2ccc3c(c2)[C@@]24CCCC[C@@]2(O)[C@@H](C3)N(CC2CCC2)CC4)cc1
COC(=O)C[C@@H](NC(=O)c1ccc(S(=O)(=O)N2CCC[C@@H](C)C2)cc1)c1ccc(C)cc1
Cc1ccc(C)c(OCC(=O)N(Cc2ccccc2C)[C@@H](C)C(=O)NC(C)C)c1
NC(=O)OC(CCN1CCN(C(c2ccc(F)cc2)c2ccc(F)cc2)CC1)c1ccccc1
CCCCN1C(=O)[C@H](CC(=O)Nc2ccc(C(=O)OCC)cc2)S/C1=N\c1cc(Cl)cc(Cl)c1
CC(=O)N1c2ccc(-c3cnn(C4CNC4)c3)cc2N(C(=O)C2CC2)C[C@@H]1C
COc1ccc(C(=O)N2C[C@H]3CC[C@@H]2CN(Cc2cccnc2)C3)cc1F
COc1cccc(C(=O)N(Cc2ccc(Br)o2)[C@@H]2CCS(=O)(=O)C2)c1
CC(C)CN1CC(c2nc(-c3cccc(Cl)c3)no2)CC1=O
O=c1[nH]c2ccc(O)c(-c3ccc(S(=O)(=O)NCCBr)cc3)c2c2ccsc12
COc1cc(CNC[C@@H]2OCCc3ccccc32)cc(OC)c1
CC(C)(C)NC(=O)NS(=O)(=O)c1cnccc1NC(C)(C)c1ccccc1
O=C(c1ccco1)N1CCN(Cc2nc3ccccc3c(=O)n2-c2ccccc2Cl)CC1
COc1ccccc1-n1c(-c2ccccc2)cnc1SCCO
CCCc1ccc(S(=O)(=O)N[C@H]2CC[C@H]3[C@@H]4CCc5cc(O)ccc5[C@H]4CC[C@]23C)cc1
CN1CCN(C(C#N)c2ccc(Cl)c(F)c2)CC1
Cc1ncn(C)c1[N+](=O)[O-]
Cc1noc(C)c1COc1ccccc1C(=O)NCCc1ccc(Cl)cc1
CCN(CC(F)(F)F)c1ccc2c(C(F)(F)F)cc(=O)[nH]c2c1
CCc1nc2c(c(N3CCN(C(=O)c4nc[nH]n4)CC3)n1)CCNCC2
Nc1c(/N=N/c2ccc(S(=O)(=O)CCOS(=O)(=O)O)cc2)c(S(=O)(=O)O)cc2cc(S(=O)(=O)O)c(/N=N/c3ccc(S(=O)(=O)CCOS(=O)(=O)O)cc3)c(O)c12
CCCNC(=O)N1CCN(Cc2nc3cc(C(=O)N(CC)CC)ccc3o2)CC1
O=C(Cn1c(=O)n(CCc2ccccc2)c(=O)c2cccnc21)Nc1ccc(F)cc1
CC1(Cc2ccccc2C#N)C(=O)Nc2ccc(-c3ccc4[nH]ccc4c3)cc21
Cc1cnn(CCCOc2cccc(CN3CC[C@H](O)[C@@](O)(COc4c(C)ccc(C)c4C)C3)c2)c1
Cc1cc(C)cc(CC(=O)N[C@@H](Cc2ccc(O)cc2)C(=O)Nc2ccc(-c3cn4c(n3)sc3ccccc34)cc2)c1
C[C@H](NC(=O)[C@H]1Cc2ccccc2CN1)C(=O)N[C@H](C)c1ccccc1
C[C@H]1CCCCN1c1cc(Oc2ccccc2)nc(NC(=S)N[C@H](C)c2ccccc2)n1
COc1ccc(OC)c(NC(=O)c2cn(C)c3ccccc3c2=O)c1
CC(C)(C)NC(=O)C(c1ccsc1)N(C(=O)Cn1cnc2ccccc21)c1ccc(NS(C)(=O)=O)cc1
CC(C)(C)NC(=O)C(c1ccc(-c2ccccc2)cc1)N(C[C@H]1CC[C@@H]([C@@H]2CC[C@H](CO)O2)O1)C(=O)c1ccc2ccccc2c1
O=C(c1ccon1)N1C[C@@H](c2ccc3c(c2)OCO3)[C@@H]2[C@H]1C1CCN2CC1
CC1=C(C(=O)OC2CCCCCC2)[C@H](c2cc3c(cc2Br)OCO3)CC(=O)N1
CC1(C)CC(c2ccc(C(F)(F)F)cc2C2=CCNCC2)c2ccc(S(=O)(=O)Nc3ncns3)cc2O1
C/C=C/C(=O)OCC1=CC(O)CCC1=O
CN(C)CCNc1nccc(-c2cccs2)n1
O=C1[C@@H]2[C@H](c3cccc(Cl)c3)OC3(C(=O)c4ccccc4C3=O)[C@@H]2C(=O)N1c1ccc(Cl)cc1Cl
CNCc1ccc2c(c1)[C@@H](C)CC(C)(C)N2C(C)C
C[C@H](Sc1nnc(-c2ccc(F)cc2)c2ccccc12)C(=O)N(C)Cc1ccccc1
CCN(CC)[P@@]1(=Nc2ccc(OC)cc2)/C(=C2/N(C)c3ccccc3C2(C)C)C=NN1C
Cc1ccc(CCCNC(=O)[C@@H]2CN(S(=O)(=O)c3ccc(C)cc3)c3ccccc3O2)cc1
Cc1nc([C@H]2CCCCN2C(=O)C2CCCC2)nc2c1CC(=O)N2Cc1ccc(F)cc1
CCCCc1ccc(NC(=O)[C@H](C)Sc2ccc(Cl)cc2)cc1
C[C@@H](OC(=O)/C=C/c1cccs1)C(=O)N[C@H]1CCCC[C@H]1C
CC(O)(CCc1ccccc1)CNC(=O)c1ccsc1
Cc1c(NC(=O)c2ccc(C(C)(C)C)cc2)cc(F)cc1-c1ncnc2[nH]c(C3=CC[S+]([O-])CC3)cc12
C=C(C)[C@@H]1CC[C@@H](C)C(=O)C1
Cc1ccc(-c2noc(CNC(=O)c3ccc(Br)o3)n2)cc1
CC(C)OC(=O)N1CCCCC1CCn1cccn1
CC1=CC2Cc3nc4cc(Cl)ccc4c(NCCCCCCCCCNc4c5c(nc6cc(Cl)ccc46)CCCC5)c3C(C1)C2
Cc1ccc(S(=O)(=O)N(CC(=O)NCCCOC(C)C)c2ccc(C)c(C)c2)cc1
CC[C@H]1CCCCN1C(=O)[C@@H](CC)Oc1ccccc1
CCC(C)c1cc(-c2cc3c(CC(C)C)cc(-c4cc5c(C(C)C)cccc5nc4OC)cc3nc2OC)cc2nc(OC)ccc12
Cc1cc(Cl)ccc1OCC(=O)NCCCn1ccnc1
CC=COC(=O)NC(c1ccccc1)C1(C(=O)OC)CCCC1=O
NC(C(=O)NCc1ccccc1)c1cnc2ccccc2n1
COc1cc(/C=C2\OC(=O)C(c3ccccc3Cl)=C2c2ccc(S(C)(=O)=O)cc2)ccc1O
COc1ccc(OC)c2c1cc1c(=O)nc(SC)nc-1n2C
CCOC(=O)C1=C(C)NC(=O)NC1c1ccc(Br)cc1
CCCCc1ccc(S(=O)(=O)N2CCN(c3cc(S(=O)(=O)N4CCOCC4)ccc3OC)CC2)cc1
CC(C)(C)C(=O)CSc1nsc(N)n1
CCn1cc(C(=O)Nc2cccc(F)c2)c(S(=O)(=O)N2CCN(c3cccc(C)c3C)CC2)n1
CCOC(=O)c1c(NC(=O)[C@@H](C)OC(=O)c2ccc(C#N)cc2)sc2c1CC[C@H](C)C2
COc1ccc(C#Cc2ccc([C@@H]3[C@@H](CO)N4CCCCN(C(=O)Nc5ccccc5F)C[C@@H]34)cc2)cc1
CCN(C(=O)CSc1ccc2c(c1)OCCO2)[C@@H](C)c1cccc(OC)c1
CCOc1ccccc1NC(=O)c1cc2ccccc2cc1O
Cc1ccc(Oc2nc(C)ccc2/C(=N/O)N2CCN(C)CC2)cc1
Cc1ccccc1O[P@](=O)(/C=C1\N(C)c2ccccc2C1(C)C)c1ccccc1
CCN(CCO)Cc1ccc(Br)c2cccnc12
CC(C)C(=O)Nc1ccccc1-c1ccc2c3[nH]ncc3c(=O)n(CC(F)(F)F)c2c1
C[C@H](O)C1CC(CCn2cnc3c(N)ncnc32)C1(C)C
C[C@H]1CC(CCN)C[C@H](C)O1
Cc1c(OC2CCN(CC3CCN([C@@](C)(Cc4ccc(F)cc4)C(=O)O)CC3)CC2)ccc(Cl)c1Cl
CCOC(=O)c1ccc(N2C(=O)C(O)=C(C(=O)c3ccc(Cl)cc3)[C@H]2c2ccc([N+](=O)[O-])cc2)cc1
CCCCCNS(=O)(=O)c1ccc(C)c(C(=O)OC)c1
O=C(O)CCCCCCCCCC#C/C=C/C(O)CC1CCCC1
CCCCNC(=O)CNc1cc(S(=O)(=O)N(C)C)cc(C)c1C
CCN(CC)CCNc1nc2c(c(O)nc(=O)n2C)n1C[C@H](O)COc1ccccc1
O=C(OC1CC2CCC(C1)[N+]21CCCC1)C(O)(c1ccccc1)c1ccccc1
CCn1c(C(C)=O)nc2cc(C(F)(F)F)ccc21
COc1ccccc1-c1cc(=O)c2cccc(OC)c2o1
COC(=O)C1=C(C)NC(C)=C(C(=O)OC)C1C(=O)OCc1cc(F)cc2c1O[C@@H](c1ccccc1)OC2
O=C(NNC(=O)[C@H](Cc1ccc(O)cc1)NC(=O)c1ccc(-c2ccccc2)o1)c1ccc(Br)cc1
Nc1ncnc2c1ncn2[C@H]1CO[C@@H](OCP(=O)(O)O)C1
CC[C@@H](Oc1ccc(N(C)S(C)(=O)=O)cc1)C(=O)NCc1ccc(N2CCOCC2)cc1
COC(=O)/C=C(\C)Cc1cccc(C[C@H]2O[C@@H]2[C@@H](C)[C@H](C)O)c1
O=[N+]([O-])c1ccc(/C=C2/S/C(=N/c3ccccc3C(F)(F)F)N=C2O)cc1
CC1CCC(N2Cc3nc(N)ncc3C2=O)CC1
O=C(NC[C@H]1CCOc2ccccc21)Nc1ccc2[nH]c(C(F)F)nc2c1
CCc1ccccc1N1C(=O)/C(=C/c2ccc3c(c2)C(C)=CC(C)(C)N3CC)C(=O)NC1=S
CCOc1ccc(-c2cc3c(=O)n(CCC(=O)N4CCCC4)ccn3n2)cc1
CCCN(CCC)C1Cc2ccccc2C1
CCOC(=O)C1CCN(C(=S)NC2CCCC2)CC1
CC(C)[C@@H](NC(=O)CNC(=O)CCC(=O)OCC(=O)[C@@]1(O)CC[C@H]2[C@@H]3CCC4=CC(=O)CC[C@]4(C)[C@H]3[C@@H](O)C[C@@]21C)C(=O)O
O=C(Nc1ccccc1F)c1ccccc1COc1ccccc1
CC/C=C/C=C/C=C/C=C/C=C/OCC(O)CO
COc1ccc(C(=N)N[C@H](Cc2c[nH]c3ccccc23)c2nc(-c3ccccc3)c[nH]2)cc1
Nc1ccn2nc(-c3ccc(F)cc3)c(-c3ccnc(NC4CCCC4)n3)c2c1
Cc1c(C(=O)NC2CCCC2)nnn1-c1ccc(Cl)cc1
O=C(CCNS(=O)(=O)c1ccc2c(c1)CCN2C(=O)C1CC1)Nc1ccc(Cl)cc1
Nc1cccc2c1C(=O)N(C1CCCCC1)C2=O
COc1cc(NC(=O)[C@@H]2CCCN(C(=O)c3ccc(Cl)cc3)C2)cc(OC)c1
CC(C)CCNC(=N)N
CC[C@H]1CCCCN1CCCNC(=O)[C@H](C)Oc1cc(C)ccc1C(C)C
C[C@@H]1CC[C@H]2C(CN)=C(C(F)(F)F)O[C@@H]3O[C@]4(C)CC[C@@H]1[C@@]23OO4
CC1=C(C(=O)OC[C@@H]2CCCO2)[C@H](c2cccc(Cl)c2)n2ncnc2N1
Cc1cc2oc(=O)cc(CN(C)[C@H]3CCS(=O)(=O)C3)c2cc1Cl
Cc1nc(C)n(-c2cc([C@H]3C[C@@H]3c3nc4ccccc4n3C)nc(N3CCN(C)CC3)n2)n1
COc1ccccc1CCOc1cncc2nnc(-c3c[nH]nc3-c3ccc(C(F)(F)F)cc3)n12
Cn1nnc(-c2ccc(C(=O)N3CCN4CCNC(=O)[C@@H]4C3)cc2)n1
c1ccc(C(c2ccccc2)[C@H]2CC[C@@H](NCc3c[nH]c4ccccc34)CN2)cc1
O=C(CNC(=O)c1ccccn1)N[C@@]12CCC(=O)[C@@H]3Oc4c(O)ccc5c4[C@@]31CCN(CC1CC1)[C@@H]2C5
Cc1cc(N2CC[C@H](N[C@H](C)CCc3ccc(O)cc3)C2=O)n(C)n1
C[C@H](NC(=O)c1ccc(C(=N)NO)cc1)C(=O)N1CCC(OCC(=O)O)CC1
COC(=O)[C@@H](C)Sc1nnc2cc(C)c3cccc(C)c3n12
CCn1c(=O)c2[nH]c(-c3ccc(OCC(=O)Nc4ccc(C(C)=O)cc4)cc3)nc2n(CCCOC)c1=O
CO[C@H](CNC(=O)c1cc(C)oc1C)c1ccc(C)s1
N=C(N)NCCC[C@H](NC(=O)[C@H](Cc1ccccc1F)NC(=O)[C@@H](Cc1ccccc1)NS(=O)(=O)Cc1ccccc1)C(=O)c1nccs1
CNS(=O)(=O)c1ccc([C@H](C)NC[C@@H]2CC[C@@H](C)O2)cc1
CCCCc1ccc(Nc2nc3ccccc3nc2NS(=O)(=O)c2ccc(Cl)cc2)cc1
Cc1ccc(-n2nc(C(=O)O)c3c2CCS(=O)(=O)C3)cc1
Cc1ccc(C)c(OCCn2cc(C(=O)C3CCCCC3)c3ccccc32)c1
OC1[C@H]2CCC[C@H]1CN(Cc1cccc(OCC(F)(F)F)c1)C2
Cc1ccc(-n2nc(-c3ccccc3)c3cnc4cc5c(cc4c32)OCO5)cc1C
C[C@@H](NC(=O)c1cc(=O)cc(C(=O)N[C@@H](Cc2ccccc2)[C@H](O)C(=O)Nc2cccc(-c3nn[nH]n3)c2)o1)c1ccc(F)cc1
CC(c1ccco1)N(C(=O)COc1ccc(C#N)cc1)C1CC1
COc1ccc(/C=C2\CCC3=CC(=O)CCC3(C)C2=O)cc1
N#Cc1ccc(OCC(=O)NC2CCCCCC2)cc1
COc1ccccc1C1=NO[C@@](C)(C(=O)N(C)Cc2ccccn2)C1
C[C@H](NCc1ccccc1C(F)(F)F)C12CC3CC(CC(C3)C1)C2
O=C1C=C(Br)C(=O)c2ccccc21
O=c1oc2cc3c(cc2cc1[C@@H](CO)Cc1ccc2c(c1)OCO2)OCO3
CCOc1cc([C@H]2NC(=O)NC(C)=C2C(=O)OC)ccc1OC[C@H](O)N/N=C/c1ccc(C)cc1
COc1cc(/C=C\c2ccc(O)c(OC)c2)cc(OC)c1
O=C(NCCc1cccs1)c1ccc2ccc(N3CCN(C(=O)c4ccccc4)CC3)n2c1
N#Cc1nc(-c2ccc(OCc3ccc(Cl)cc3)cc2)oc1N1CCCCCC1
CC(C)C[C@H](NC(=O)[C@H](CO)NC(=O)[C@H](Cc1ccccc1)NC(=O)c1ccc(-c2ccccc2)cc1)C(N)=O
CCCNC(=O)[C@H](CC)N(Cc1ccccc1Cl)C(=O)CN(c1ccc(Br)cc1)S(=O)(=O)c1ccccc1
COc1cc(C(=O)O)cc(C(=O)NCc2cnc(C)cn2)c1
CCC[C@H](NC(=O)[C@@H]1C[C@@H]2CCCC[C@@H]2N1C(=O)[C@@H](NC(=O)[C@@H](NC(=O)c1ccc[nH]1)C1CCCCC1)C(C)(C)C)C(=O)C(=O)NC1CC1
Cc1ccc2c(c1)c1c(c(=O)n(-c3cccc(Cl)c3)c(=O)n1CC(=O)NCC1CCCO1)n2C
Nc1nc(NC2CCCCCC2)c2ncn(C3O[C@H](CO)[C@@H](O)[C@H]3O)c2n1
COC(=O)C[C@@H](c1cccs1)c1c(O)n2ccccc2nc1=O
C/C1=C\C=C(\C(C)C)[C@@H](O)C[C@]2(C)O[C@H]2CC/C(C)=C/CC1
O=C(Nc1ccc2c(c1)Cc1c-2nc(O)c2nccn12)c1ccccc1
CCN1C(C(=O)c2ccccc2)=C(NC(=O)c2ccc(Cl)cc2)c2ccccc2S1(=O)=O
Cc1c(C(=O)Nc2cccc(C(F)(F)F)c2)cnn1-c1ccc(F)cc1
CC(C)CCNC(=O)[C@H](C)NP(=O)(O)CNC(=O)OCc1ccccc1
N[C@H](CC1CCCCC1)C(=O)N1CCC[C@H]1C(=O)NCCc1c[nH]cn1
COc1cccc(C(=O)N2[C@H]3CC[C@@H]2c2cnc(C4CC4)nc2C3)c1
CCc1ccc2c(c1)[C@]1(C(=O)N2)[C@H]2C(=O)N(c3ccc([N+](=O)[O-])cc3OC)C(=O)[C@@H]2[C@H]2CCCN21
CC(=O)Nc1nonc1NC(=O)C[C@H]1COc2ccc(C(=O)N(C)C)cc2N1C
CCOC(=O)[C@H](C(=O)O)c1ccccc1
O=C(Nc1cccc(-c2nc3ncccc3o2)c1)[C@@H]1OCCN(C2CC2)[C@H]1c1ccccc1
CN1CN(c2ccccc2)C2(CCNCC2)C1=O
O=C1/C(=C/c2cn(-c3ccccc3)nc2-c2ccc(OCc3ccc(Cl)cc3Cl)cc2)SC(=S)N1C1CCCCC1
Cn1/c(=N\C(=O)c2ccc(F)c(F)c2)sc2cc([N+](=O)[O-])ccc21
O=C(Nc1ccc(C(F)(F)F)cc1Cl)c1ccco1
Cc1ccc(C(=O)NCC(C)(C)C(N)=O)cc1C
CCOC(=O)c1c(C)[nH]c(/C=C2\S/C(=N\c3ccc(OC)cc3)N(c3ccc(OC)cc3)C2=O)c1C
CCN(C(=O)COC(=O)/C=C/c1cccc([N+](=O)[O-])c1)c1c(N)n(Cc2ccccc2)c(=O)[nH]c1=O
CCc1ccc2oc(-c3ccc(F)cc3)nc2c1
COc1ccc2c(c1)CCCN2Cc1nc2ccccc2[nH]c1=O
COc1cc2c(c(OC)c1O)[C@@H]1Cc3cc(OC)c(O)c(OC)c3[C@@H](C2)O1
CC(C)OCCCNC(=O)C1CCN(c2ncnc3ccsc23)CC1
CSCC[C@@H]1NC(=O)[C@H](NC(=O)N[C@@H](CCCNC(=N)N)C(=O)O)CCCCNC(=O)[C@H](Cc2ccccc2)NC(=O)[C@H](C)N(C)C(=O)[C@H](CCc2ccc(O)cc2)NC1=O
Cc1ccc(NC(=O)CCC(=O)O[C@@H](C)C(=O)c2ccccc2)cc1C
CCCCNC(=O)[C@@H](CC)N(Cc1cccc(C)c1)C(=O)CN(c1cc(Cl)cc(Cl)c1)S(=O)(=O)c1ccccc1
O=C(Nc1ccc2c(c1)OCO2)c1ccc(Br)s1
CCN(CC)Cc1cc(/C=C2\CNC/C(=C\c3ccc(O)c(CN(CC)CC)c3)C2=O)ccc1O
CN1C(=O)c2ccc(OCCCC(=O)O)cc2C1=O
COC(=O)[C@H](CO)c1cc(OC)c(O)c(OC)c1
COc1ccc(NC(=O)C(=O)Nc2ccc(F)cc2)c(C(=O)Nc2ccc(N3CCOCC3=O)cc2)c1
COc1ccc(Nc2nc(N3CCCC(NC(=O)c4ccc(C(=O)O)cc4)C3)nc3scnc23)cc1OC
COc1cccc(Cl)c1CNC(=O)N1CCCC1
CC(=O)NCCNc1cc(Cl)nn2c(-c3cccc(S(=O)(=O)NC(C)C)c3)c(C)nc12
Fc1ccc(C(c2ccc(F)cc2)N2CCN(C(=S)Nc3ccc(C(F)(F)F)cc3)CC2)cc1
O=C(CCC(=O)Nc1ccc(F)cc1)N/N=C/c1cccs1
CCCc1cc([C@@H]2CCCN2C(=O)Cc2ccc(OC)cc2)no1
Cn1ncc(N2CCC[C@@H](CC(=O)NCc3cc(F)ccc3F)C2)cc1=O
CC(N)c1ccc(-c2cnc3c(-c4ccc(S(N)(=O)=O)c5ccccc45)cnn3c2)cc1
CC1(C)C[C@H](NC(=O)c2ccc(CN3CCCC3=O)cc2)c2ccccc2O1
COc1ccc(C(=O)C2=C(O)C(=O)N(CCCN(C)C)[C@H]2c2cccnc2)c(C)c1
Cc1nc(N)nc(N)c1/C=C/C(C)(C)c1ccc(Cl)cc1
Cc1cc(Cl)ccc1O[C@H](C)C(=O)N1CCN(c2ccccc2)CC1
Cc1ccc(N(CC(=O)Nc2ccc(Br)cc2F)S(C)(=O)=O)cc1
COc1cc(C2CCCc3nc(SCc4c(F)cccc4Cl)n(-c4ccc(F)c(C(F)(F)F)c4)c32)ccc1Cl
CC(C)CC(=O)/N=C1/S[C@H]2CS(=O)(=O)C[C@@H]2N1c1ccc(N2CCC(Cc3ccccc3)CC2)cc1
CC(C)(C)NCC(O)COc1ccccc1C1CCCC1
Cn1nc2c(cc1=O)C[C@H](NC(=O)[C@H]1CC=CCC1)CC2
O=C1OC2(CCN(c3nc4cc(C(F)(F)F)ccc4[nH]3)CC2)CN1c1ccccc1
CCO[C@H]1CCCN(C(=O)c2cnn(-c3ccccc3)c2CC)C1
Oc1ccc2c(ncn2-c2ccccc2)c1Br
O=C(O)c1cc(O)nc(O)c1
Cc1cc(C[C@H](NC(=O)c2c(C)cccc2Cl)C(=O)O)ccc1-c1cn(C)c(=O)n(C)c1=O
O=S(=O)(N1CCOCC1)N1C[C@H]2CC[C@@H]1CN(CCCc1ccccc1)C2
O=C(CNC(=O)C1(c2ccc(F)cc2)CC1)NCCN1CCOCC1
O=C(N/N=C/C1=C(Cl)c2ccccc2CCC1)c1cccc(Cl)c1
S=C(NCC1(c2ccc3c(c2)OCO3)CCOCC1)Nc1ccccc1
Cc1n[nH]cc1-c1nccnc1C1CCN(S(C)(=O)=O)CC1
C[C@@H]1CCCN(S(=O)(=O)c2ccc(N3C(=O)CCC3=O)cc2)C1
CC[C@]1(C)Cc2ccccc2-c2nc3n(C)nc(SCC(C)C)n3c(=O)c21
O=C(Nc1nc(-c2ccc(Cl)cc2)cs1)c1ccc(COc2ccc(Br)cc2)cc1
N=c1sc2cc(OC(F)(F)F)ccc2n1CCn1cc(-c2cc(F)cc(F)c2)nn1
C[C@H](NC(=O)c1ccnnc1)c1ccc(OC2CCN(c3ccnc(OCC(F)F)c3)C2)cc1
Fc1ccc(-n2cnc3c(NCc4nc5c(F)c(F)ccc5[nH]4)nc(N4CCOCC4)nc32)cc1
O=C(O)[C@@H](Cc1c[nH]c2cccnc12)/N=C(/O)OCC1c2ccccc2-c2ccccc21
COC(=O)c1ccc(NC(=O)c2ccc([N+](=O)[O-])c(OC(C)C)c2)c(OC2Cc3ccccc3C2)c1
COC(C)(CC=O)OC
O=C1CCC(C(=O)N2CCN(S(=O)(=O)c3cccc(C(F)(F)F)c3)CC2)=NN1
Nc1nc(OCCN2CCN(c3ccc(F)cc3F)CC2)cc2nc(-c3ccco3)nn12
Cc1ccc(F)c(C2=NCCN2)c1
C=CCOc1ccc(C=NNc2nncc(-c3ccc(OC)cc3)n2)cc1
O=C(CCc1nnc(-c2ccsc2)o1)NCc1ccccc1OC(F)(F)F
COc1ccc(C2=Nc3ccccc3N(C(=O)Cc3cc(OC)cc(OC)c3)C2C(=O)NC(C)C)cc1
O=C(CCc1ccncc1)N1CCCC[C@@H]1CCn1cccn1
COc1cc(C(=O)OCCN2CCOCC2)cc(OC)c1OC
Cc1ccc2c(c1)[C@H]1CN(C)CC[C@H]1N2C(=O)c1cc2c(C)nn(-c3ccc(Cl)cc3)c2s1
COCc1cccc(CNC(=O)COc2cc(F)cc(F)c2)c1
CCN(CC)c1ccc(C(=C(c2ccc(N(CC)CC)cc2)c2ccc(N(CC)CC)cc2)c2ccc(N(CC)CC)cc2)cc1
C[C@H](O)c1cc2ccccc2c2ccccc12
O=C(O)[C@H]1C[C@H]2C[C@H]1C1(C2)SCCCS1
Cc1cccc(/C=C/C(=O)N2CCN(Cc3c(C)noc3C)CC2)c1
CCCCCCCCCC(=O)O[C@@H]1[C@H](OC)[C@@H]([C@@H](CC(N)=O)O[C@H]2OC(C(=O)N[C@H]3CCC[C@@H](C)NC3=O)=C[C@@H](O)[C@H]2O)O[C@H]1n1ccc(=O)[nH]c1=O
Cc1c(/[N+]([O-])=N/C#N)c(-c2ccccn2)nn1C
C[C@@H](C(=O)N1CCc2ccccc21)N1CCn2c(nnc2C2CC2)C1
CC(C)C[C@@H]([13CH]=O)NC(=O)OC(C)(C)C
NC(=O)C(N[C@H]1CC[C@H](c2c[nH]c3ccncc32)CC1)C1CCN(C(=O)/C=C/c2cc(F)c(F)c(F)c2)CC1
COc1ccc(Sc2ccccc2C=NO)cc1OC
O=C(c1ccc(F)cc1)C1CCN([C@@H]2CN(C(=O)c3ccc(F)cc3)CC[C@H]2O)CC1
CCCCCCCCCCCC(CCCCCCCCCCC)NC(=O)NC(CCC(=O)O)(CCC(=O)O)CCC(=O)O
CN1CCN(C(=O)c2ccc([C@H]3CCCN3C(=O)c3csnn3)nc2)CC1
CC[C@H](C)[C@H](NC(=O)[C@H](C)NC)C(=O)N1CCC[C@H]1C(=O)NC1CCCc2ccccc21
C[C@H](Oc1ccc(Cl)cc1Cl)C(=O)NCCOC(=O)Nc1ccc(Cl)cc1
C=CCn1c(Cc2cccs2)nnc1SCC(=O)c1ccc(F)cc1
N[C@@H](CC(=O)N1CCC[C@H]1c1noc(C2CC2)n1)Cc1cc(F)c(F)cc1F
Cc1ccc(N=c2cc(-c3cccnc3)[nH]c(=NCCO)[nH]2)cc1Cl
O=C(NCc1ccc(Cl)cc1)[C@@H]1CN(S(=O)(=O)Cc2ccccc2)c2ccccc2O1
O=C(CN(C(=O)c1ccc(-c2ccccn2)cc1)C1CCCC1)Nc1cc(F)cc(F)c1
COc1ccc2c(C)nc(NC(=NC(C)=O)NC(C)=O)nc2c1
COc1cccc(OC)c1-c1cnnc(NCc2nc3cc(NC(C)=O)ccc3s2)n1
COC[C@H](O)Cn1cc(-c2cn3ncc(C(N)=O)c(N[C@H]4CN(c5ncc(C#N)cn5)C[C@H]4C)c3n2)cn1
O=C1Nc2cc(Cl)c(Cl)cc2C1=O
CCn1ncc(Br)c1CO
COc1cc(/C=C2/S/C(=N/c3nc(-c4ccccc4)cs3)NC2=O)ccc1O
Cc1cnc(COC(=O)c2cc(Cl)ccn2)o1
C1C[C@@H]2CNC[C@@H]2[C@H](N2CCOCC2)C1
COc1ccc(CN2C(=S)N(c3ccc(F)cc3)C(=O)[C@H]2CC(=O)Nc2ccc(Cl)cc2)cc1
CO[C@H]1C[C@H](N(C)C(=O)Cc2cccc3sccc23)[C@@H](N2CCCC2)C[C@H]1OC
C=CCn1c([C@@H](C)Oc2ccc(CC)cc2)n[nH]c1=S
CN(C)c1ccc(CNC(=O)C2CCN(C(=O)c3ccc(-n4ccc5ccccc54)s3)CC2)cc1
Cc1cnc(-c2nnc(C3CCN(C(=O)c4ccc(F)c(Cl)c4)CC3)o2)cn1
CCCCC[C@H](O)C#C[C@H]1[C@H](O)C[C@H](O)[C@@H]1CCCCCCCC(=O)O
O=C(c1cc(C2CC2)on1)N1CCN(c2ccc(S(=O)(=O)N3CCOCC3)cn2)CC1
CCCCN1C[C@@]2(CCCN(C(=O)c3oc(CC)nc3C)C2)CCC1=O
CC(C)(C)OC(=O)N1CC(C(C)(C)C#N)C1
CC(=O)N1CCN(CC#Cc2ccc(CN(CC(C)(C)C)c3ccnc(C#N)n3)cc2)CC1
Cc1ccc(NC(=O)c2ccc(CN3CCN(C)CC3)c(C(F)(F)F)c2)cc1OC1CCN(C(=O)c2cccnc2F)CC1
CCn1nc(C)c(CNC(=O)C(=O)Nc2ccc(C#N)cc2)c1C
Cc1nn(C[C@@H](C)C(=O)Nc2sc3c(c2C#N)CC[C@H](C(C)(C)C)C3)c(C)c1Br
FC(F)(F)[C@@H]1CCC[C@H](NC[C@@H]2COC3(CCOCC3)O2)C1
COc1ccccc1/C=C(/C)C(=O)c1c(C)cc(C)[nH]c1=O
COc1ccc(-c2nnc(S[C@H](C(=O)Nc3ccc(Cl)cc3C(F)(F)F)c3ccccc3)n2CC(C)C)cc1
COc1cc(Nc2nc3n(n2)CC(O)CN3Cc2ccccc2)ccc1-n1cnc(C)c1
Cn1ccnc1[C@@H](NC(=O)N1CCC(O)CC1)c1ccc(F)cc1
CNC(=O)[C@H]1C[C@@H]2CN(C(=O)Cc3ccsc3)C[C@@H]2N1C(C)C
O=C(O)COc1c(Br)cc(/C=C2\C(=O)NC(=O)N(c3ccc(Cl)c(Cl)c3)C2=O)cc1Br
O=C([C@@H]1CCCN(c2ccc(-n3cncn3)nn2)C1)N1CCN(S(=O)(=O)C2CC2)CC1
Cc1[nH]cnc1CSCCNC1=NCC(O)=C1
Cc1nccn1-c1ccc(CNC(=O)c2ccc([N+](=O)[O-])cc2Cl)cc1
NC(=O)c1cccc([C@@H]2C[C@@H]3CC[C@H](C2)N3CCN(CC2CCC(C(F)(F)F)CC2)C(=O)CO)c1
CN(CCC[C@H]1CCCO1)C(=O)Nc1cc(-n2cnnn2)ccc1F
CC(=O)N1CCC[C@@H]1C(=O)N[C@H](C(=O)N1CCC[C@@H]1C(=O)N[C@@H](CO)C(=O)O)[C@@H](C)O
Cc1ccc(NC(=O)CCCn2c(=O)c3cccn3c3ccccc32)c(Cl)c1
COc1ccc(NCC(C)(C)C(=O)O)cc1Cl
c1ccn(C[C@@H]2CC[C@@H]3[C@@H]2OCCN3CC2CCOCC2)c1
CCOC(=O)/C(=C/c1ccccn1)C(=O)c1ccccc1
CNC(=O)c1ccc2c(c1)OCCc1cc(C(=O)N(C)c3ccccc3Cl)sc1-2
O=C(CCn1cnc2sc3c(c2c1=O)CCCC3)Nc1ccc(F)c(F)c1
Cc1ccc(CNc2nc(Nc3ccc(C)cc3C)c3cnn(C)c3n2)cc1
CCOc1cccc(N2C(=O)/C(=C/c3cc(C)n(-c4ccc(C)c(C)c4)c3C)C(=O)NC2=S)c1
COC(=O)CC[C@]1(O)Sc2ccccc2NC1=O
Cc1[nH]c2ccc(OC(F)(F)F)cc2c1CCNCC1CC=CCC1
COc1cc2c(cc1C(=O)NNc1ccc(OC(F)(F)F)cc1)CC[C@H]1C(C)(C)C(=O)C(C#N)=C[C@]21C
N#C[C@@H]1CS[C@H]2CC[C@@H](N)C(=O)N21
O=C(NC1CCCCC1)c1cccc2cccc(NS(=O)(=O)c3ccc(Cl)cc3)c12
O=C(Nc1cccc(-c2cnco2)c1)c1csc(-c2ccco2)n1
C[C@H](Oc1ccc(Br)cc1Br)C(=O)Nc1nc2ccccc2s1
C[C@@H]1C[C@H]2C(=C(O)CC[C@H]2O)C(=O)O1
O=C1CC2(CCCC2)CC(=O)N1CCCCN1CCc2cccc(Cl)c2CC1
Cc1cc2n(n1)[C@@H](C(F)F)C[C@@H]([C@H]1CCCN(C(=O)C3CCCCC3)C1)N2
C[C@@H](CO)CCC[C@@H](C)[C@H]1CC[C@H]2[C@@H]3CC=C4C[C@@H](O)CC[C@]4(C)[C@H]3CC[C@@]21C
CC(C)[P+](Cc1ccc(C(=O)c2ccc(C[P+](C(C)C)(C(C)C)C(C)C)cc2)cc1)(C(C)C)C(C)C
NC[C@H]1CCCCN1C(=O)c1cc(Br)cc2nc[nH]c12
CCCCCCCCC/C(=N\O)c1cc(-c2ccc(OC)c(F)c2)ccc1O
O=C(Nc1ccc(/C=C/c2ccc(NC(=O)[C@@H]3C[C@@H](O)CN3C(=O)OCc3ccccc3)cc2)cc1)[C@@H]1C[C@@H](O)CN1C(=O)OCc1ccccc1
Cn1c2c(c3ccccc31)/C(=N/OCc1ccccc1)CCNC2=O
C=C(Br)CN(C)CC(=C)Br
COc1ccc(CCN(C)CCC=C2c3ccccc3-c3ccccc32)cc1OC
OC[C@@H]1O[C@H](OC[C@H]2S[C@H](O)[C@H](O)[C@@H](O)[C@@H]2O)[C@@H](O)[C@@H](O)[C@@H]1O
CCCCCCCCCCCCNC(=O)C(=O)Nc1ccc(OC)cc1
CCOC(=O)c1cc(-c2cccc(OC(=O)NC3CCCCC3)c2)n(-c2ccccc2)n1
COc1ccc(S(C)(=O)=O)cc1C(=O)N1CCN(c2ccc(C#N)cc2F)CC1
CCOCCn1c(CC)nc2ccccc21
CC(C)C[C@H](N)C(=O)N[C@H](C(=O)O)C(C)C
C/C(CC(=O)Nc1ccccn1)=N\NC(=O)Cc1cccc2ccccc12
COC(=O)N[C@H](C(=O)N[C@H](c1ccc([C@@H](CO)N(CCC(C)(C)C)S(=O)(=O)c2ccc(N)cc2F)s1)C(F)(F)F)C(c1ccccc1)c1ccccc1
CCN1C(=O)[C@H]2[C@@H](C1=O)[C@@H](c1ccc(C)cc1)N[C@]21CCCN(Cc2ccc(C)cc2)C1=O
CN(C)C(=O)[C@@H]1CCCN(c2nnnn2-c2ccccc2)C1
CCCCC[C@](C)(OCC)C(=O)Nc1ccc(OCC)cc1
CSc1nc(-c2cccs2)nc(C)c1C(=O)NCCCO[C@@H](C)c1ccccc1
O=Cc1cc(=O)c2ccccc2[nH]1
COC(=O)[C@]1(C)[C@@H](O)CC[C@]2(C)c3cc4c(cc3[C@@H](O)C[C@H]21)[nH]c1ccccc14
Cc1cc(C(=O)OCC(=O)c2ccc3ccccc3c2)ccc1[N+](=O)[O-]
O=C(Nc1cc[nH]c(=O)c1)c1ccc(Cl)cc1Oc1ccc(F)cc1
C[C@]12C=C[C@H]3[C@@H](C=C1)[C@]3(C)S2(=O)=O
C=CCN1CN(Cc2ccccc2)CNC1=S
CCOc1ccc(C(=O)C2=C(O)C(=O)N(c3nc4ccc(CC)cc4s3)[C@H]2c2cccc(Br)c2)cc1
CCN(CC)c1c(C)c(C(=O)OC)nn1-c1ccccc1
Cc1ccccc1Cn1c(C)c(C(=O)NCC(C)C)sc1=O
COc1ccc(CCN2C[C@H](C(=O)N3CCN(C(C)=O)CC3)CCC2=O)cc1
O=C1N=C(N2CCCCC2)S/C1=C/c1cccs1
O=C1[C@H]2Cc3ccccc3CN2C(=S)N1c1ccccc1F
O=[N+]([O-])c1ccc(O)c(CN2CCN(CC(F)F)CC2)c1
CC1(C)CC(=O)C(=NNc2ccc(-c3ccccc3)cc2)C(=O)C1
COc1ccc(Oc2cc(C)nc(Cl)n2)nn1
COC(=O)C1CCN(Cc2coc(-c3ccc(OC(F)(F)F)cc3)n2)CC1
O=C(NCCN1CCN(c2ccccc2)CC1)C1(S(=O)(=O)c2ccc(Cl)cc2)CC1
CC[C@H](NC(=O)c1cccc(S(=O)(=O)NC)c1)c1ccc(OC)cc1
COc1ccccc1N1C(=O)[C@@H]2C(C(C)=O)=NN(c3c(Cl)cccc3Cl)[C@@H]2C1=O
C[C@@H]1CCN(C(=O)C(=O)NC2CC2)[C@H]2CCCC[C@H]21
COc1ccc(-n2[nH]c3c(cnc4ccc(Cl)cc43)c2=O)cc1
COc1cc(OC)cc(-c2cc3cnc(NCCCCN4CCOCC4)cc3nc2NC(=O)NC(C)(C)C)c1
O=C(O)[C@@H]1C[C@H]2CCCC[C@@H]2N1C(=O)c1ccnc(C2CC2)n1
O=C(c1ccccc1)c1ccccc1NCC(O)COc1ccc(Cl)cc1
CCO[C@H](CNC(=O)c1ccc(S(=O)(=O)N2CCCC[C@@H]2C)cc1)c1ccccc1
O=C(CSCc1ccc(F)cc1)NCc1ccc(OCc2ccc(F)cc2)cc1
CCn1cc(NC(=O)C(=O)N[C@@H]2CCCC[C@H]2C(C)C)ccc1=O
CC(C)n1ncc(CC(=O)Nc2cc(C(=O)c3cn(CCO)c4ccncc34)ccn2)c1C(F)(F)F
Clc1cncc(Cl)c1CN1CCC[C@H](c2ccn[nH]2)C1
Cc1ccc(CN2CCC3(CC[C@@H]3N3CCOCC3)CC2)cc1C
CC(C)OCCNC(=O)c1cnc2c(c1)nc(-c1ccccc1Cl)n2C
COc1ccc(CC(N)C(=O)N(C)C2C(CO)OC(n3cnc4c(N(C)C)ncnc43)C2O)cc1
C[C@@]1(C(N)=O)CCCN(Cc2ccc(-c3ccccc3C(=O)O)o2)C1
OC[C@@H]1Cc2c([nH]c3ccccc23)CN1
CCCOC(=O)[C@H](C)N1C(=O)/C(=C\c2ccc(OC)cc2)SC1=S
COCCN1CCc2[nH]c(-c3ccnc(Nc4ccnn4C)n3)cc2C1=O
O=C(Nc1ccc(Cl)cc1)c1ccc2c(c1)n(Cc1ccccc1)c(=O)c1ccnn12
Cc1cccc(-n2c(=O)c3c4c(sc3n3cnnc23)CCCC4)c1
Cc1ccn2c(Nc3ccc(C(C)C)cc3)c(-c3cccs3)nc2c1
N#CCC(=O)c1cccc(Cl)c1
COc1ccc(C(=O)Nc2cccc(C(CCO)Nc3ncnc4c(C(N)=O)cccc34)c2)cc1
COc1cc(/C=C2\C(=N)N3OC(C)=CC3=NC2=O)ccc1OCCSc1ccccc1
COc1ccc(CC(=O)N[C@H](C)[C@@H]2C[C@H]3CC[C@H]2C3)cc1
NC(=O)[C@H]1CCN(C(=O)[C@@H]2SCCc3sccc32)C1
O=C(/C=C\c1ccc2ccccc2n1)Nc1ccc2c(c1)CCC2
CCc1ccc(OCCNC(=O)c2ccc(N(C)S(=O)(=O)c3ccccc3)cc2)cc1
C[C@]12CC[C@H]3[C@@H](CC(c4ccccc4)C4=CC(=O)CC[C@@]43C)[C@@H]1CC=C2c1cccnc1
CC(C)(C)n1nc2c(c1NC(=O)c1c(F)cccc1F)CS(=O)(=O)C2
COc1cccc(-n2cnc3c2N=C(O)C[C@H]3c2ccsc2)c1
COc1ccc2nc(C)c(O[C@@H]3C[C@H]4C(=O)N[C@]5(C(=O)NS(=O)(=O)C6CC6)C[C@H]5/C=C\CCCCC[C@H](NC(=O)OC5CCCC5)C(=O)N4C3)nc2c1
COc1cccc(C(=O)Nc2cccc(SC3=C(Nc4ccc(F)cc4)C(=O)N(c4ccc(OC)cc4OC)C3=O)c2)c1
COCCNC(=O)[C@H]1CNCc2ccnn21
COc1ccc(-c2nc(C)ccc2OCc2cccc(C)n2)cc1
CCC(COC)N(C)c1nc(C)nc2c1nnn2-c1ccc(C(C)C)cc1Br
CC/C(=N/CCc1ccc(OC)c(OC)c1)C1=C(O)CC(C)(C)CC1=O
Cc1ccc2occ(/C=N/Nc3nc4c(c(N5CCOCC5)n3)CS(=O)(=O)CC4)c(=O)c2c1
COc1ccc(-c2noc(CSc3ccccc3)n2)cc1OC
O=C(CN1C(=O)S/C(=C/c2ccc(Cl)cc2)C1=O)N1CCCCCC1
COc1ccc(F)cc1C(=O)N1C[C@@H](O)[C@H](N2CCN(C)CC2)C1
NCCCNc1cccc(Cl)c1
C[C@@H](C(=O)NCc1ccc(Cl)cc1)C1CCN(C(=O)c2cc3ccccc3[nH]2)CC1
O=S(=O)(Nc1ccsc1-c1nc(C2CC2)no1)c1ccc(Br)s1
CC[C@@H]1CN(C(=O)N[C@@H]2CCCN(S(C)(=O)=O)C2)C[C@H](C)O1
Cc1c(CC(=O)N[C@@H]2C=CS(=O)(=O)C2)c(=O)oc2c(C)c3oc4c(c3cc12)CCCC4
O=C(O)c1ccccc1OC1CCC1
CCOC(=S)Nc1ccc(S(=O)(=O)c2ccc(NC(=S)OCC)cc2)cc1
FC(F)(F)Oc1cccc(-c2csc3ncnc(N4CCC(COCCN5CCCC5)CC4)c23)c1
CC[C@H](NC(=O)COc1ccc2ccccc2c1)c1ccc2c(c1)CCCC2
O=C(c1cccc(S(=O)(=O)Nc2ccc(F)cc2)c1)N1CCc2ccccc2C1
FC(F)(F)c1ccnc(-c2cccc3c2CCNC3)n1
COc1cc(C2C(C#N)=C(N)Oc3[nH]nc(C)c32)ccc1OC(=O)c1ccccc1
Cc1ccc(NS(=O)(=O)c2ccc(NC(=O)/C=C/c3cccc([N+](=O)[O-])c3)cc2)cc1
Cc1ccc(Sc2cc(Cl)nc(-c3ccccc3)n2)cc1
COc1cccc(C(=O)N[C@H](c2ccc3c(c2)CCO3)[C@H]2C[C@@H](O)C2)c1C
Cc1cccc(OCc2ccc(C(=O)N[C@H]3C(=O)N4C(C(=O)O)=C(CSc5nnc(C)s5)CS[C@@H]34)o2)c1
Cc1ccc(N(C)C(=O)c2cnn(-c3ccccc3)c2C)c(C)c1
CCn1c(=O)n([C@H]2CCCN(c3ccnc(-c4ccc(Cl)cc4)n3)C2)c2ccccc21
CC(C)C[C@@H](NC(=O)[C@H](Cc1ccccc1)NC(=O)[C@@H](O)CN)C(=O)O
C[C@H](c1cc(F)ccc1F)N(C)Cc1nc(O)c2sccc2n1
N#Cc1cccc(Nc2nc3ncnc-3c(O)[nH]2)c1
C[C@@H]1COc2ccccc2CN1C(=O)CC[C@@H]1Cc2ccccc2NC1=O
CC[C@H](C)NC(=O)[C@H](CC)N(Cc1ccc(OC)cc1)C(=O)CN(c1ccccc1OC)S(=O)(=O)c1ccc(OC)cc1
COc1cc(C(c2c(O)n(C)c(=S)n(C)c2=O)c2c(O)n(C)c(=S)n(C)c2=O)cc(Cl)c1O
CC(C)CNCc1ccc(-c2ccc(CN(CCCN3CCN(C)CC3)C(=O)CCC3CCCC3)cc2)cc1
C[C@@H](O)c1cccc(N2CCCN(Cc3ccc(F)cc3)CC2)n1
Nc1nc(N)c(/N=N/c2ccc(S(=O)(=O)NC(=O)c3ccccc3)cc2)c(O)n1
COc1cc(C=Nn2c(C)nc3ccc(Br)cc3c2=O)c(Br)c(Br)c1OCc1ccc(Cl)cc1
O=C([C@@H]1Cc2ccccc2O1)N1CC2(C1)OCC[C@@H]2CCOc1ccccn1
Cc1cc(/C=C2\C(=O)N(C)c3ccc(S(=O)(=O)N4CCOCC4)cc32)c(C)n1-c1cc(Cl)cc(Cl)c1
O=C(c1ccccc1)C(/N=N/c1ccccc1)(c1ccccc1)c1ccccc1
CC[C@H]1CCCCN1C(=O)c1ccc(Oc2ccc(C)nn2)cc1
CN(O)C(=O)C1=Cc2cc(OCc3ccccc3)ccc2OC1
C[C@@H](O)CNCCOC(c1ccccc1)c1ccccc1
C[C@H](c1ccccc1)N1CC(=O)C2=C(C1)OC(N)=C(C#N)[C@H]2c1ccccc1
Cc1nn([C@H](C)CC(=O)N[C@H]2[C@H](c3ccccc3)[C@H]3CCC[C@H]32)c(C)c1C
CCc1nn2c(-c3c(OC)cc(CO)cc3OC)cccc2c1N(CC1CCOCC1)CC1CC1
CCOC(=O)[C@@]1(C(F)(F)F)N=C(c2cccc(F)c2)OC(N2CCCCC2)=N1
CC[C@@H](C)NC(=O)[C@H](C)N(Cc1ccc(F)cc1)C(=O)CSCc1c(Cl)cccc1Cl
Cc1cc(Nc2cc(C3CC3)[nH]n2)nc(NCc2cc(-c3cccc(Br)c3)no2)n1
N#Cc1cc(-c2ccc(C[C@@H](C#N)NC(=O)[C@H]3NC4CCC3CC4)cc2)ccn1
CC(=O)N[C@H](CC(=O)Nc1ccc(F)c(Cl)c1)c1ccccc1
Cc1ccc(S(=O)(=O)N(CC(=O)N(Cc2c(Cl)cccc2Cl)[C@@H](Cc2ccccc2)C(=O)NC2CCCCC2)c2cc(Cl)ccc2Cl)cc1
COc1ccc(NC(=O)CCCCc2nc3ccccc3s2)cc1OC
O=C[C@@H]1CCCN1C(=O)[C@@H]1CCCN1C(=O)C[C@H]1CCc2ccccc2C1
Cc1n[nH]c(C)c1S(=O)(=O)N1CCC(O)(Cc2ccc(Cl)c(Cl)c2)CC1
COc1ccc(C)c2sc(N(Cc3cccnc3)C(=O)c3ccc([N+](=O)[O-])s3)nc12
COc1cccc(N=C[C@H]2C(=O)NC(=O)N(c3ccc(C)cc3)C2=O)c1
NC(=O)c1cccc2c(NCc3cccc(NC(=O)c4ccnc(N5CCOCC5)c4)c3)ncnc12
Cc1cc(Cl)cc2c1NC(=O)[C@]21N2CCC[C@@H]2[C@@H](C(=O)c2ccc3ccccc3c2)[C@@]12C(=O)Nc1ccccc12
CCc1ccc([C@@H]2CO2)nc1
C=C(c1ccccc1OC(C)c1ccccc1)n1ccnc1
CCCCCOc1ccc([C@@H]2C(C(=O)c3ccc(OCCCC)cc3)=C(O)C(=O)N2C[C@@H]2CCCO2)cc1
COc1ccc(C(=O)N2[C@H](C)CCC[C@H]2C)cc1OC
C/C=C/C=C/[C@](C)(O)C/C=C/[C@H]1[C@H](O)CC(=O)[C@@H]1CC/C=C\CCC(=O)OC
C=CC(=O)N[C@@H]1Cn2c(c(-c3ccc(Oc4ccccc4)cc3)c3c(N)ncnc32)C1=C
COc1ccc([C@H]2CCCN2C(=O)Cn2cnc3sc(-c4ccccc4)cc3c2=O)c(OC)c1
Cn1c(-c2ccc([S+](C)[O-])cc2)nc2c(Sc3ccc(F)cc3)ncnc21
C=C(CCC(C(=O)O)[C@H]1[C@H](O)[C@H](O)[C@@]2(C)C3=CC[C@H]4C(C)(C)[C@@H](O)CC[C@]4(C)C3=CC[C@]12C)C(C)C
O=C(CSc1nnc(-c2ccccc2Br)o1)N1CCN(C(=O)c2ccco2)CC1
COCCNC(=O)Cc1ccc(-n2c(=O)c3ccccc3n(CC(=O)Nc3cccc(F)c3)c2=O)cc1
CC1=C(C(=O)OCc2ccccc2)N2C(=O)C[C@H]2S1
Nc1noc2ccc(-n3nc(C(F)(F)F)cc3C(=O)Nc3ccc(N4CCOCC4)cc3F)cc12
Cn1cc(-c2cc(S(=O)(=O)C(F)(F)F)ccc2OCC2CC2)c2cc[nH]c2c1=O
C=C(C)[C@@H]1CC[C@]2(C#N)CC[C@]3(C)[C@H](CC[C@@H]4[C@@]5(C)CC[C@H](OC(C)=O)C(C)(C)[C@@H]5CC[C@]43C)[C@@H]12
COc1ccc2nc(N/N=C3\C(=O)NC(=O)N=C3O)sc2c1
c1cc(Nc2ccc(NC3=NCCS3)cc2)ccc1NC1=NCCS1
C=C1CCN(C(=O)OCc2ccccc2)CC1
Cc1nc(C(=O)OCc2ccc(C(N)=O)cc2)nn1-c1ccc(F)cc1
O=C(/C=C/c1ccc(Cl)cc1)Nc1nc2ccc(Cl)cc2s1
O=C(Nc1ccccc1-n1cncn1)c1cc(F)ccc1F
CCN1CCN(CCNC(=O)c2ccc(CS(=O)(=O)c3c(Cl)cccc3Cl)o2)CC1
CN1CCN(c2ncc(NC(=O)Nc3cccc(F)c3)cn2)CC1
COC(=O)Cc1ccccc1NC(=O)c1ccoc1
COc1cc(/C=C/c2ccc(C#N)cn2)cc(Br)c1O
COc1ccc2c(c1OC)C[N@@+]1(C)CCc3cc4c(cc3[C@@H]1[C@H]2O)OCO4
O=C(NCCC1CCCc2ccc(O)cc21)c1ccc(OC(F)(F)F)cc1
CC1CN(C(=O)c2cc3cc(Nc4nccc(-c5ccccn5)n4)ccc3[nH]2)CCN1C(=O)N1CCCC1
CC(C)N(CCN)Cc1ccccc1C#N
CC(C)(C)NC(=O)CSc1nc2ccsc2c(=O)n1-c1ccccc1Cl
Cc1cn2c(O)c3ncn(COC(CO)CO)c3nc2n1
CCCOc1ccc(NC(=O)c2ccccc2C)c2cccnc12
Cc1cc(Nc2ncc(C)s2)nc([C@@H]2CCCN(C(=O)c3cccc(Cl)c3F)C2)n1
COc1cc(C(=O)N2CCC[C@H]2c2ccc3c(c2)OCCCO3)ccc1OC(F)F
CCN1C(=O)CO[C@H](c2nc(C(C)(C)NC(C)=O)no2)[C@H]1c1ccccc1
CC(Sc1ccccc1)C(=O)N1CCN(S(=O)(=O)c2ccc(Cl)cc2)CC1
CC(=O)Nc1ccc(NC(=O)[C@H](Cc2ccccc2)NS(=O)(=O)c2ccc(F)cc2)cc1
O=C1CC(=O)N2CCSC2=N1
O=C(NC[C@H](O)[C@@H](O)[C@H](O)[C@H](O)CO)c1ccn(Cc2cc(Cl)c(CN3CSC[C@H]3C(=O)N3CCN(C4CC4)c4ccccc43)cc2Cl)n1
Cc1cc(C(=O)COc2ccccc2Cl)c(C)n1C1CC1
O=C1c2ccccc2-c2c1c1ccccc1c(=O)n2CCCCCCCNS(=O)(=O)c1ccc(Br)cc1
Cc1cc2nc(-c3ccc(-c4nnc(-c5cccc(Cl)c5)o4)cc3)[nH]c2cc1C
N#Cc1ccc2ccc(=O)n(CCN3CC[C@H](NCc4cc5c(cn4)OCCO5)[C@H](O)C3)c2c1
Cc1ccc(-c2ccnc(NCCSc3nnnn3C)n2)c(C)n1
CCOC(=O)C1=C(C)N=c2s/c(=C\c3cc(Br)c(OCc4cccc(Cl)c4)c([N+](=O)[O-])c3)c(=O)n2[C@H]1c1ccc(C)cc1
N#Cc1ccc(C(=O)NC2CCN(C(=O)c3ccco3)CC2)cc1
COc1c(C)c(/C=C/C(=O)O)oc(=O)c1CO
Cc1nc(NC(=S)NC(=O)COc2ccc(Cl)cc2)ccc1Br
CCCCC1OC2(C)OC(=N)C1(C#N)C(C#N)(C#N)C2c1ccccc1
C[C@H]1CC/C=C\[C@@H]2C[C@@]2(C(=O)NS(=O)(=O)C2(C)CC2)NC(=O)[C@@H]2C[C@@H](Oc3cc(-c4nccs4)nc(-c4nccs4)c3)CN2C(=O)[C@@H](NC(=O)OC(C)(C)C(F)(F)F)[C@H](C)C1
CC[C@@H](C(=O)NCC(C)C)N(Cc1ccc(Cl)cc1)C(=O)COc1cccc(C)c1
Cc1nonc1NC(=O)CSc1nnc(N)s1
COc1ccccc1N1CCN(c2ccc(Cl)nn2)CC1
CN1CCC(c2ccc(-c3nc4c(C(N)=O)cccc4[nH]3)cc2)CC1
O=C(CN1N=C(c2ccccc2)CCC1=O)NCCN1CCc2ccccc2C1
COc1ccc(CN2C[C@H]3C[C@@H](O)CN3C[C@H]2C)cc1CO
Cc1ccc(N(Cc2nnc(SCC(=O)N[C@H]3CCCC[C@H]3C)n2C)S(C)(=O)=O)cc1
C=C1CCC[C@H]2[C@]1(C)CC[C@H](C)[C@@]2(C)CC/C(C)=C/CO
COc1ccccc1-c1nnc(NC(=O)[C@H]2CCCCN2S(=O)(=O)c2cccs2)o1
Cc1c(Nc2ncccc2C(=O)O)cccc1C(F)(F)F
Cc1ccsc1CN[C@@H]1CCN(c2ccc(C(=O)Nc3ccccc3)cn2)C1
COCCCNC(=O)c1nc2c3c4c(sc3nc(C)n2n1)CCC[C@@H]4C
CCO/C(O)=C1\C(COCCNc2nccnc2Cl)=NC(C)=C(C(=O)OC)C1c1cccc(Cl)c1Cl
C[C@H](NC(=O)COC(=O)c1csc2c1CCCC2)c1ccc(F)cc1
CC[C@H](C)CC(=O)N1CCC(n2cc(C(C)(C)N)nn2)CC1
Cc1cc(C)nc(O[C@H]2CC[C@H](NC(=O)c3ccccn3)CC2)n1
CCCS(=O)(=O)N1CCN(c2nc(C3CC3)nc(COC)c2Cc2cccc(C)c2)CC1
O=C(Cn1cnc2ccccc2c1=O)Nc1cc(Cl)ccc1Cl
COc1ccc(-n2c(C)cc(C#N)c2C)cc1Cl
CCOc1ccccc1OCCN1CCN(c2cnn(CCCCN3CCN(c4ccccc4OC(C)C)CC3)c(=O)c2Cl)CC1
O=C(COC(=O)[C@H](Cc1ccccc1)NC(=O)c1cccs1)Nc1cc(F)ccc1F
O=c1cnc2cnc(OCc3ccccc3)nc2n1Cc1ccc(F)cc1
COc1ccccc1CC(=O)N1CCN(Cn2cc(Cl)cn2)CC1
Cc1ccc(C(=O)/C=C(\O)C(=O)NN=C(c2ccccc2)c2ccccc2)cc1
O=C1c2cc(F)ccc2S(=O)(=O)N1CCCCN1CCC(n2c(=O)oc3ccccc32)CC1
Cc1cc(CN2CCN(C(C)C)C(CCO)C2)[nH]n1
O=C(c1c(F)cccc1Cl)N(c1ccccc1)[C@@H]1C=CS(=O)(=O)C1
NS(=O)(=O)c1cccc(NC(=O)CCCC2CCCCC2)c1
O=C1C2=C(Nc3c(c(-c4c[nH]c5ccccc45)nn3-c3ccc(Cl)cc3)C2c2cccs2)c2ccccc21
CC(=O)c1cc(OCc2cccc(Br)c2)ccc1O
Clc1ccc(C[P+](c2ccccc2)(c2ccccc2)c2ccccc2)cc1Cl
O=C1N[C@H](c2c(F)cccc2Cl)[C@@H](C(=O)C(F)(F)F)[C@](O)(c2ccccc2)N1
Cc1ccc(S(=O)(=O)N[C@H](Cc2ccccc2)C(=O)Oc2ccc3c(=O)c(-c4ccc([N+](=O)[O-])cc4)coc3c2)cc1
CCO/C(O)=C1\C(COCCNc2ccnc(O)n2)=NC(C)=C(C(=O)OC)C1c1cccc(Cl)c1Cl
O=C(c1cc(-c2ccccc2)nn1-c1ccccc1)N(Cc1nnc(-c2ccccc2Cl)o1)C1CC1
N=C(N)NCCC[C@H](NC(=O)[C@H](Cc1cccs1)NC(=O)[C@H](Cc1ccc(O)cc1)NC(=O)[C@@H](N)Cc1ccc(O)cc1)C(=O)c1nc2ccccc2s1
O=C(/C=C/c1ccc(Br)cc1)c1ccc(OCc2cn([C@H]3CC(=O)N4C[C@@H]5CCCN6CCC[C@@H]([C@H]56)[C@H]4C3)nn2)cc1
CC(C)CCn1nc(CNc2ccc(Br)cc2)[nH]c1=O
CC(C)(CN)CC(=O)O
Cc1cc(C(=O)N2CCN(C)C[C@H](Cc3cccc4cccnc34)C2)no1
CCOc1ccc(NC(=O)CCn2cccc2)cc1
COc1cccc(CNC(=O)c2cnc3c(-c4ccc(F)cc4)c(C)nn3c2C)c1
Cc1ccc(C(O)c2nc(-c3ccc(F)cc3)c[nH]2)cc1F
CS(=O)(=O)N(Cc1ccc(C(=O)NC2CCCCC2)cc1)c1cccc(Cl)c1
CCc1ccc(C(=O)NNC(=O)c2cc(S(=O)(=O)N(C)C)ccc2N2CCCC2)cc1
CCOC(=O)C(=O)Nc1ccc(S(=O)(=O)Nc2nccc(C)n2)cc1
COc1c(C)cc(CN(C)[C@@H](C)c2nnc(C)o2)cc1C
CC(=O)Nc1ccc(NC(=O)CSc2nnc(-c3ccco3)o2)cc1
CCOC(=O)c1ccc(NC(=O)CC2C(=O)N(c3ccc(F)cc3)C(=O)N2Cc2ccc3c(c2)OCO3)cc1
CC(=O)c1c(F)cccc1NCCc1n[nH]c(=O)[nH]1
CCOc1ccccc1-n1c(=S)sc2c(=O)n(-c3ccc(F)cc3)c(SCC(=O)Nc3nccs3)nc21
CCC(=O)Oc1cccc(C(=O)Nc2cccc(OC)c2)c1
N=c1oc2ccc(Br)cc2cc1C(=O)NCc1ccccc1
Cc1cccc(CNc2cc(NC3CC3)n3ncc(/C=C4\NC(=O)NC4=O)c3n2)c1C
NC(=O)N[C@@H]1OC(=O)c2cccc3[nH]cc1c23
N#CCC1(n2cc(-c3ncnc4[nH]ccc34)cn2)CN(C2CCN(C(=O)Nc3ccc(F)cc3F)CC2)C1
Oc1ccccc1N=Nc1ccccc1O
C/C=C/C(=O)Nc1cccc(C2=NOC3(C2)C[C@@H](C(N)=O)N(C(=O)/C(C)=C/C)C3)c1
COc1cc(Oc2ccnc3cc(F)ccc23)ccc1CC(=O)Nc1noc(C)c1C
COc1cc(/C=C2/SC(=O)N(Cc3ccccc3)C2=O)cc(Br)c1OCc1ccc(C#N)cc1
CCCOc1ccc(-c2cnc(N)s2)cc1
COc1ccc2c(c1)c(CNC(=O)N(C)O)c(C)n2C(=O)c1ccc(Cl)cc1
C[C@@H](Sc1nnnn1C1CCCCC1)C(=O)O
C[C@@H](F)[C@H]1OC(N)=N[C@](C)(c2cc(NC(=O)c3cnc(OCF)cn3)ccc2F)[C@H]1F
O=C(CCc1nc(O)c2c3c(sc2n1)CCCC3)N1CCN(c2ccccc2)CC1
O=C(Nc1cccc(-c2ccc(CO)o2)c1)c1ccc(-c2cccc(C(F)(F)F)c2)o1
O=C(CCCn1cncn1)N1CCCC(Nc2ccc(F)cc2)C1
CC1(C)CC2CC(C)(CN2C(S)=Nc2ccccc2F)C1
CN1CCN([C@@H](CNC(=O)C(=O)Nc2ccc([N+](=O)[O-])cc2)c2ccc(N(C)C)cc2)CC1
Cc1cc(Cl)ccc1OCC(=O)N1N=C2CCCC[C@H]2[C@]1(O)C(F)(F)F
Cc1ccc2nc(-c3ccc(N)c(Br)c3)sc2c1
O=C(Cn1cnc2ccsc2c1=O)NCCc1nc(C2CC2)no1
N#Cc1ccc(NC2CCN(C(=O)C3CCCCC3)CC2)nc1
Cc1cccc(CN2CCN(Cc3ccc(-c4ccccc4Cl)o3)C[C@H]2CCO)n1
CC[C@](O)(c1ccc(C)cc1)[C@H](CN1CCOCC1)c1ccccc1
CCCNC(=O)[C@H](C)N(Cc1ccc(C)cc1)C(=O)CN(c1ccc(OCC)cc1)S(=O)(=O)c1ccc(F)cc1
O=C(Cc1ccccc1C(=O)O)Nc1ccccc1N1CCCC1=O
Cc1cc(C)nc(S[C@H](C)CNS(=O)(=O)c2ccccc2)n1
O=C(Nc1ccccc1)C1C(c2ccccc2)C1(Cl)Cl
COC(=O)c1ccc(CNC(=O)CC[C@@H]2Cc3ccccc3NC2=O)cc1
COc1ccc([C@@H](C)NC(=O)[C@@H](C)Oc2cccc3c2CCCC3)cc1
CCc1ccc(OCc2nc(C)c(C(=O)Nc3nc4ccc(C)cc4s3)s2)cc1
CC(=O)N[C@@H](C)c1ccc(CN2CCc3cc(OCC4CC4(F)F)ccc3C2)cc1
Cc1ccc(C(=O)N2CCC([C@@H](NC(=O)c3cccs3)C(=O)N3CCCC[C@H]3C)CC2)cc1
CCOc1cc(C(=O)OCC(=O)Nc2ccc(SC(F)F)cc2)cc(OCC)c1OCC
CCCCCCCCCCCCc1ccc(S(=O)(=O)Nc2nnc(C(=O)OCC)s2)cc1
CC(=O)c1ccc(OCCCC(=O)Nc2ccc(S(=O)(=O)N3CCOCC3)cc2)cc1
C[C@@]1(Cc2cccc(Cl)c2)CCc2cc(C(=O)N(CC(=O)O)Cc3ccc(C(F)(F)F)cc3)ccc2O1
CCN(CC)C(=O)[C@H](c1ccccc1)N1CCS(=O)(=O)CC1
NCCCC[C@@H](N)C(=O)Nc1ccc(-n2nc(C(F)(F)F)cc2-c2ccc3c(c2)Nc2ccccc2S3)cc1
CCC(CC)C(=O)OCC(C)(C)CC1=C(O)C(=O)c2ccccc2C1=O
C[C@H]1CCC[C@@H](NC(=O)COC(=O)c2cccc3ccccc23)[C@@H]1C
COc1ccc(-c2nnc(CN(C)C(=O)c3ccc(C)c(Cl)c3)o2)cc1OC
C[C@H](C(=O)N1[C@H](C(=O)O)C[C@@H]2CCCC[C@H]21)S(=O)(=O)c1ccc(F)cc1
CCCCCCCCCCCCCCOC(=O)CCC1(CO)CCC(=O)O1
Cc1cc(/C=C2\C(=O)N(C)c3ccc(S(=O)(=O)N4CCOCC4)cc32)c(C)n1-c1ccc(NC2CCCC2)c([N+](=O)[O-])c1
O=C(COC(=O)CNC(=O)C1CCCCC1)Nc1cc(C(F)(F)F)ccc1Cl
CC(=O)Nc1ccc(S(=O)(=O)NCCC(=O)N[C@@H](C)c2ccncc2)cc1
Cc1ccc([C@@H]2[C@H](c3ccccn3)NC(=S)N2C[C@H]2CCCO2)n1-c1ccccc1
Cc1ccc(S(=O)(=O)N(C)C)cc1NC(=O)COC(=O)c1sc2cc(Cl)ccc2c1Cl
O=C(NC1CCCCC1)C1CCN(C(=O)CCc2ccccc2)CC1
CCCCCNC(=O)[C@H](Cc1ccc(OC(C(=O)O)C(=O)O)cc1)NC(=O)[C@H](Cc1c(F)c(F)c(F)c(F)c1F)NC(=O)OC(C)(C)C
O=C(CSCc1ccccc1)NCCc1ccc(F)cc1
N[C@@H](Cc1cnc[nH]1)C(=O)NCCCn1c2c(c3ccccc3c1=O)C(=O)c1ccccc1-2
Cc1cc(/C=C/c2ccc(C(=O)O)cc2)cc(C)c1O
COc1ccc(-c2ccc3c(N4CCOC[C@@H]4C)nc(N4CCCC(c5nc(C)no5)C4)nc3n2)cc1CO
COc1ccc(N2CCCN(CC3CCN(C(=O)CCn4cnnn4)CC3)CC2)cc1
NS(=O)(=O)c1ccc(CC/N=C/c2cccc(/C=N/CCc3ccc(S(N)(=O)=O)cc3)c2)cc1
C[C@H](C1CC1)N(Cc1ccccc1)C(=O)NC[C@H](c1cccs1)N1CCN(C)CC1
C[C@H](C(=O)O)c1cccc(Br)c1
O=C(NCCCNC(=O)c1nccs1)c1cc(-c2ccccc2)on1
N=C1c2ccccc2CN1NC(=O)COc1ccc(Cl)cc1
COc1ccc(C(=O)Nc2ccc(N3CCOCC3)cc2)cc1OC
Cc1n[nH]c(C(=O)NCc2c(C)nn(-c3ccccc3)c2C)c1C
CC(=O)Nc1cccc(OCc2cc(=O)oc3c2ccc2ccccc23)c1
CCc1nn(CC(=O)N[C@@H]2CCCC[C@H]2C)c(=O)c2cc3sccc3n12
COc1cc2ncnc(Nc3ccc(F)c(Cl)c3)c2cc1NC(=O)N/N=C/c1ccc(O)cc1
CCOc1ccc(O)c(C#N)c1
CN(Cc1csc(-c2ccccc2)n1)C(=O)[C@@H]1CCOC1
O=C(NCc1ccc(CN2CCCCC2)cc1)[C@H]1CCCN(S(=O)(=O)CCCc2ccccc2)C1
CCN1C(=O)CS/C1=N\NC(=O)CSc1nc2ccccc2c(=O)n1CC
Cc1ccc(S(=O)(=O)c2ccc(C(=O)Nc3ccc(Br)cc3)cn2)cc1
O=C(c1ccccc1)N1CCN(C(=O)c2ccccc2)CC1
COc1ccc(C(=O)c2ccc(=O)n(-c3ccccc3C)c2)c(OC(=O)OCc2ccccc2)c1
CCN(CC)CCCNc1nccc(N(C)c2ccc(NC(=O)Nc3cc(C(F)(F)F)ccc3F)cc2)n1
CCOc1ncccc1C(=O)OCc1csc(-c2ccccc2)n1
CC(C)[C@H](NS(=O)(=O)c1ccc2c(c1)OCCO2)C(=O)OCC(=O)Nc1cc(Cl)ccc1Cl
CC(=O)N[C@@]1(C)C[C@H](c2ccccc2O)O[C@@H]2C[C@H](C)CC[C@H]21
COc1ccc(Br)c(CC2CCN(CCc3ccc(OC)c(OC)c3)CC2)c1
CCOc1cc(CNCc2ccc3c(c2)OCO3)ccc1O[C@H](C)C(=O)N(C)C
C=CCNC(=O)[C@@H]1CCCN1C(=O)[C@H](CCCC)[C@@H](F)C(=O)NO
Cc1cc(NC(=O)[C@@H](C)Oc2ccc3c(c2)CCCC3=O)no1
Cc1ccc(NC2=Nc3ccccc3N3C2=Nc2c(c(C)nn2-c2ccccn2)[C@H]3c2ccc(Cl)cc2)cc1
COC(=O)C1CC(N[C@@H](C)c2ccccc2)C1
COc1ccc(S(=O)(=O)N(CC(N)=O)c2cc(N(CC(N)=O)S(=O)(=O)c3ccc(OC)cc3)c3ccccc3c2)cc1
C[C@H](NCc1cccc(C#N)c1)C(=O)N1CCCCC1
NC(=O)CCCNC(=O)[C@H]1CC(=O)N(c2ccc3c(c2)CCC3)C1
C[C@H]1CCCCO[C@H](CN(C)Cc2ccc(C(F)(F)F)cc2)[C@@H](C)CN([C@@H](C)CO)C(=O)c2cc(NC(=O)c3ccccc3)ccc2O1
COc1ccc(-n2cc(C(=O)OC[C@@H]3CCCO3)c3ccccc3c2=O)cc1
CC(C)(C)OC(=O)N1CCCc2ccc(NCc3cc[nH]c3)cc21
O=C(Nc1ccc([N+](=O)[O-])cc1)c1ccc(N(CCCl)CCCl)cc1
O=C(NCc1cncc(C2CC2)c1)NCc1cccs1
CN(Cc1ccc(OCCCO)cc1)C[C@H](O)COc1ccccc1
N#CCCn1cnc2c(F)cc(Br)cc2c1=O
O=C(c1ccc(S(=O)(=O)N2CCOCC2)cc1)n1cnc2ccccc21
CCCCN(Cc1ccc([N+](=O)[O-])cc1)CC(O)(Cn1cncn1)c1ccc(F)cc1F
CCC(=O)N(c1ccccc1)[C@H]1CCN(CCc2ccccc2)C[C@@H]1C
O=C(NCCCN1CCOCC1)C1CCN(S(=O)(=O)c2cccc(Cl)c2Cl)CC1
O=C([C@H]1CCN(c2cnn(CC3CC3)c(=O)c2)C1)N1CCOCC1
CO[C@H]1CCOC2(C1)CN(C(=O)CSC)C2
COc1ccc2c3c(ccc2c1)C(O)=C(C=O)CC3
CC12CCC(=O)C=C1CCC1C2CCC2(C)C1CCC2(O)CC#N
CC1(C)CC[C@]2(C(=O)NCCCN3CCOCC3)CC[C@]3(C)C(=CC[C@@H]4[C@@]5(C)Cc6cn(S(=O)(=O)c7ccc(C(C)(C)C)cc7)nc6C(C)(C)[C@@H]5CC[C@]43C)[C@@H]2C1
Cn1nc(C(=O)NNc2c(F)c(F)cc(F)c2F)c2ccccc2c1=O
Cc1cc(NC(=S)NCCCc2ccccc2Cl)ccc1N1CCCC1=O
CC(Cc1ccc(S(=O)(=O)N(C(C)C)C(C)C)cc1)NCC(O)c1cccc(C(F)(F)F)c1
Oc1ccc(NCc2ccc(Br)cc2)cc1
O=C(C(=O)N1CCN(C(=O)c2ccccc2)CC1)c1c[nH]c2c(F)ccc(F)c12
C[C@@H]1CCC[C@@H](C)N1C(=O)CN(C)S(=O)(=O)c1ccc2c(c1)C(C)(C)C(=O)N2C
Cc1cc(C)n(C[C@H](O)CN(Cc2ccccn2)Cc2ccco2)n1
O=c1c(-c2ccc(O)cc2)c(SCc2ccccc2)oc2cc(O)ccc12
Cc1csc(CN(C)C(=O)[C@H]2CCC(=O)NC(=O)N2)n1
COc1ccc([C@@H]2[C@@H]3C(=O)N(C(C)(C)C)C(=O)[C@@H]3[C@]3(C)C(=O)N(c4ccccc4)C(=O)N23)cc1
COc1cccc(CN2CCN(CCOc3cccc4nc(C)ccc34)CC2)c1
CCN(CCN(C)C)C(=O)CC1=C(C)/C(=C/c2ccc([S+](C)[O-])cc2)c2ccc(F)cc21
CCN1CCN(Cc2c(O)ccc3c(=O)c(-c4ccc(OC)c(OC)c4)c(C)oc23)CC1
COc1ccc(-c2cnc(Nc3ccc4[nH]ncc4c3)o2)cc1OC
Cc1c(F)cccc1NC(=O)[C@@H]1C[C@H](O)CN1C(=O)OCC(C)C
CCN1CCC(n2cc(Nc3ncc(C(F)(F)F)c(CCc4ccccc4C(C)C(N)=O)n3)cn2)CC1
C#CCN1C(=O)S/C(=C/c2cc(Br)c(OCC=C)c(OCC)c2)C1=O
Cc1cc(N)nc(CCCF)c1
O=C(O)c1cn(-c2ccc(F)cc2F)c2nc(N3CCC(=NO)CC3)c(F)cc2c1=O
c1ccc(-c2cn([C@H]3CN4CCC3CC4)nn2)cc1
CC(=O)O[C@H]1CC[C@@]2(C)C(=CC[C@H]3[C@@H]4CC=C(c5nn(-c6ccc(C)cc6)cc5C=O)[C@@]4(C)CC[C@@H]32)C1
FC(F)Cn1cc(NCc2ccc(-c3ccccc3)cc2)cn1
CC(C)C[C@H](NC(=O)[C@@H]1CCCN1)C(=O)N[C@@H](CCCNC(=N)N)C(=O)N[C@@H](Cc1ccccc1)C(N)=O
COc1cc(/C=C2\Oc3cc(OC)c(C)c(OC)c3C2=O)ccc1OCc1ccccc1
Nn1cnn2c(SCC(=O)N3c4ccccc4Sc4ccccc43)nnc12
COc1ccc(N2C(=O)C[C@H](N(CCc3ccc(OC)c(OC)c3)C(=O)/C=C\C(=O)O)C2=O)cc1
CCCCC(=O)Nc1ccc(N2CCOCC2)c(C(=O)O)c1
Clc1cccc(C2=NN3[C@H](C2)c2ccccc2O[C@@H]3c2ccncc2)c1
Cc1cc(C)cc(NC(=O)CCn2ccnc2)c1
COc1cc(C(=O)NC[C@H](c2cccnc2)N2CCc3ccccc3C2)cc(OC)c1OC
COc1ccc(CCNC(=O)Cn2nc(C)c3c(C)n(-c4ccc(C)cc4)nc3c2=O)c(OC)c1
CCn1c(/N=C/c2ccc(OC)cc2O)nc2ccccc21
CCOCCN1C[C@]23C=C[C@H](O2)[C@H](C(=O)N(C)Cc2ccncn2)[C@H]3C1=O
Oc1nnc(-c2ccccc2)c(-c2ccccc2)c1-c1ccc(Br)cc1
COc1cccc(C2CCN(C(C)C)C2)c1
CC/C=C/CCNC(=O)OCCCc1c[nH]cn1
COc1ccc2cc(C(=O)C3CCCN(C4CCOCC4)C3)ccc2c1
COC[C@@H]1CN(CC2CC2)C[C@@]12CCN(C(=O)c1ncccn1)C2
CCCCOc1cc(/C=C2\S/C(=N/S(=O)(=O)c3ccc(C)cc3)N(CC)C2=O)ccc1OC
CC1(C)NC(=O)N(CC(=O)OCC(=O)N2CCN(S(=O)(=O)c3ccccc3)CC2)C1=O
CC(C)CNC(=O)c1ccccc1NC(=O)c1cc(S(=O)(=O)N2CCOCC2)ccc1Cl
O=c1cc(C(F)(F)F)c2cc3c(cc2[nH]1)OCCN3
O=C(NCCc1ccccc1)[C@H]1CCCN(C2CCN(c3ncccn3)CC2)C1
O=c1c2cc(O)ccc2oc2cc(O)c(O[C@@H]3O[C@H](CO)[C@@H](O)[C@H](O)[C@H]3O)c(O)c12
COc1ccc(-c2cnc3nc(-c4cc(NC(=O)c5ccco5)ccc4F)oc3c2)cc1
CC(=O)N[C@@H]1CC2(CCN(Cc3ccc4[nH]c5ccc(F)cc5c4c3)CC2)c2ccccc21
COC(=O)C[C@@H](c1ccc(C(=O)O)cc1)c1oc(CN2CCOCC2)cc(=O)c1O
COc1ccc(C(=O)Nc2ccc(NC(=O)[C@H]3CCCO3)cc2)c(OC)c1
N#Cc1ccc2c(c1)CCN(CCC1CCC(NC(=O)/C=C/c3cccc4ccccc34)CC1)CC2
CN(C[C@@H](O)COc1cccc(CNCc2cccnc2)c1)C1CCCCC1
Cc1ccc(Oc2nc(C(Cl)(Cl)Cl)nc3ccccc23)cc1
CN(C1CCCCC1)S(=O)(=O)c1ccc(NC(=O)CNC(=O)Cc2ccccc2)cc1
CN(CCC(=O)N1CCN(CC(=O)NC(C)(C)C)CC1)[C@@H]1CCS(=O)(=O)C1
COc1ccccc1N1CCN(c2nccnc2SCC(=O)NCc2cccs2)CC1
CNC1=Nc2ccccc2[C@H]2CCC[C@@H]12
Cc1ccc(N2C(=S)N[C@H](c3ccccn3)[C@@H]2c2ccc(-c3ccc(C(=O)O)cc3C)o2)cc1
O=C1CO[C@H](c2ccc(NS(=O)(=O)Cc3ccccc3)cc2)[C@@H](CO)N1Cc1ccccc1
O=[N+]([O-])c1ccc2c(c1)[C@@H](N1CCOCC1)c1ccccc1-2
CCCn1nnc(N2C[C@@H](C(=O)OC)CC2=O)n1
Cc1cc(C)n(-c2ccc(CNC(=O)c3ccc4c(c3)NC(=O)CCS4)cn2)n1
O=C(CC[C@@H]1CCCN(C(=O)C2=CCCC2)C1)N1CCN(Cc2ccccc2)CC1
CO[C@@H](C(=O)N1CCC[C@@H]1c1c(C)nn(C)c1Cl)c1ccccc1
C=CCN1C(=O)C(O)=C(C(=O)c2cccs2)[C@H]1c1ccc(C)cc1
COCCNC(=O)c1ccc(C)c(Nc2nc(N[C@H]3CCNC3)nc(N(C)CC(C)(C)C)n2)c1
CN(C)CCC(Oc1ccccc1OCc1ccccc1)c1ccccc1
O=C(N[C@H]1C[C@@H]1c1ccccc1)C1(c2ccc(Cl)cc2Cl)CCOCC1
Cc1ccc2cc(CN3CCC[C@H]3C)c(N3CCN(CCO)CC3)nc2c1
CC[C@H](C(=O)NC)N(Cc1ccc(C)cc1)C(=O)COc1ccc(Br)c(C)c1
CCCn1c(COC(=O)c2cc3ccccc3s2)nc2cc(S(=O)(=O)N3CCOCC3)ccc21
COc1ccc2c(c1)C[C@@H](N[C@H](CO)c1ccco1)CC2
CCCCOC(=O)[C@H]1[C@@H]2C=C[C@]3(CN([C@@H](C)c4ccccc4)C(=O)[C@H]13)O2
O=C(NCCS(=O)(=O)c1ccccc1)C1CC1
COc1cc(OC)nc(Nc2nc(C)c(C(C)=O)s2)n1
Cc1cc(Nc2nc3ccccc3nc2N2CCN(Cc3ccccc3)CC2)n(-c2nc3ccccc3n2C)n1
Cc1ccc(-c2cc(C(=O)N(Cc3ccc(C(C)(C)C)cc3)[C@H]3CCS(=O)(=O)C3)no2)cc1C
CC(=O)c1ccc(N(CC(=O)NC(C)C)S(=O)(=O)c2ccc(C)cc2)cc1
C[C@H](NC(=O)COc1ccc(Cl)cc1C(N)=O)[C@@H]1C[C@H]2CC[C@H]1C2
NC(S)=NN=Cc1ccc(-c2ccc(S(=O)(=O)Nc3ncccn3)cc2)o1
Cn1cc(-c2ccc(CNC(=O)NCc3ccc(F)cc3)cn2)cn1
COc1cc(Br)c(S(=O)(=O)Nc2c(C)n(C)n(-c3ccccc3)c2=O)cc1OC
CCOC(=O)c1c(NC(=O)CN(C)CC(=O)Nc2cc(C)ccc2C)sc(CC)c1C
COc1ccc([C@@H]2CC(=O)c3c(cc(O)c(CNC(C)c4ccccc4)c3O)O2)cc1O
N=C(N)NS(=O)(=O)c1ccc(F)cc1
CCn1nc(C)cc1C(=O)Nc1ccc(C#N)c(C(F)(F)F)c1
CCc1ccc([C@H](C)NC(=O)CN(C)S(=O)(=O)c2ccc(OC)c(OC)c2)cc1
COc1ccc(COc2ccc(C(=O)NC[C@@H](C(=O)NO)N3CCN(S(C)(=O)=O)CC3)cc2)cc1
O=S(=O)(Cc1ccccc1)N1CCN(c2ccccc2)CC1
CN1CCC[C@@H](c2ccc(C(=O)N3CCOCC3)cn2)C1
O=C(O)CCCCCCCCn1nc(-c2ccccc2)c(-c2ccccc2)c1-c1ccccc1
COc1cccc(C2=C[C@@H](c3ccccc3Cl)n3ncc(C(=O)Nc4ccc(C)cc4)c3N2)c1
C=C[C@]1(C)C[C@@H](OC(=O)CSC(C)(C)CNC(=O)[C@H](N)c2ccccc2)[C@]2(C)[C@H](C)CC[C@]3(CCC(=O)[C@H]32)[C@@H](C)[C@@H]1O
CC(=O)O/N=C/c1c2ccccc2cc2ccccc12
c1ccc(Cn2cc([C+](c3cn(Cc4ccccc4)c4ccccc34)c3cn(Cc4ccccc4)c4ccccc34)c3ccccc32)cc1
CNC(=O)c1ccc(/C=C/C(=O)NCC(=O)N(C)c2ccc(Cl)c(COc3cccc4c(C)c(C)oc34)c2Cl)cc1
Nc1ncc(-c2cnn(CCC(=O)O)c2)c2scc(-c3ccc(Oc4ccccc4)cc3)c12
COc1ccccc1C[C@H](C)N1CCN(CCn2cc(C(=O)NC(C)C)nn2)CC1
Cc1cc(-n2c(C)cc(C(=O)COC(=O)/C=C/c3nc4ccccc4s3)c2C)no1
CCN1C(=O)/C(=C2/Sc3ccc(OC)cc3N2C)S/C1=N\c1cccc(C(F)(F)F)c1
COc1ccc(N(CC(=O)N/N=C/c2ccc(N(C)C)cc2)S(=O)(=O)c2ccccc2)cc1
CS(=O)(=O)c1ccc(C(CC2CCOCC2)C(=O)Nc2nc(-c3ccccc3)cs2)cc1
NCC(=O)NCc1ccc2c(c1)OCO2
COc1csc(C(=O)N2CCC(Nc3ccccc3F)CC2)c1
CCCc1cccc(CC)c1O
Cc1cc(C)n(C(=O)c2c([N+](=O)[O-])cnn2C)n1
C[C@@]1(c2cc(NC(=O)c3ccc(C#N)cn3)ccc2Cl)CCOC(N)=N1
CC(C)(O)[C@H]1CC[C@@](C)([C@H]2CC[C@]3(C)[C@@H]2C(=O)C[C@@H]2[C@@]4(C)CCC(=O)C(C)(C)[C@@H]4CC[C@]23C)O1
COCCC(=O)N[C@@H]1C[C@H](c2ccc(-c3ccccc3OC)cc2)O[C@@H]2CCC[C@@H]12
CCc1nn(Cc2ccc(-c3nc4cccnc4[nH]3)cc2)c(CC)c1CC(=O)O
CC[C@@H](O)c1ccc(CC(C)C)cc1
Cc1ccccc1-n1c(Cn2cc(CNS(=O)(=O)c3ccccc3)nn2)nc2cccc(C)c2c1=O
C=CCc1cc(/C=C2/SC(=Nc3ccccc3)N(C3CCCCC3)C2=O)cc(OC)c1O
CN(C)C(=O)[C@H](Cc1ccccc1)NC(=O)c1cc2sc(Br)c(Br)c2[nH]1
CN(CCN(C)C1CCCC1)Cc1cnc(N(C)C)nc1
Nc1cc(N)nc(SCC(=O)N2CCC(Cc3ccccc3)CC2)n1
COc1cccc(CN(C(=O)COc2ccc(C(C)(C)C)cc2)[C@@H](Cc2ccccc2)C(=O)NC2CCCCC2)c1
COc1ccc(OC)c(/C=C/C(=O)Nc2nnc(-c3ccccc3)o2)c1
Cc1ccc(S(=O)(=O)NC[C@@H](c2ccccc2)N2CCN(Cc3ccc(C#N)cc3)CC2)cc1
CCCNS(=O)(=O)NC/C(=N\OC)[C@@H]1C[C@H](SC2=C(C(=O)O)N3C(=O)[C@H]([C@@H](C)O)[C@H]3[C@H]2C)CN1
COc1ccc(CN(C(=O)COc2cc(C)ccc2C(C)C)c2ccccc2C(=O)O)cc1
Cc1cc(C)c(N(CC(=O)Nc2ccc(OC3CCCC3)cc2)S(C)(=O)=O)c(C)c1
O=C1Nc2ccc(Cl)cc2CN2C(=O)CC[C@@H]12
CC(C)(C)NC(=O)[C@@H]1C[C@@H]2CCCC[C@@H]2CN1C[C@@H](O)[C@H](Cc1ccccc1)NC(=O)[C@H](CC(N)=O)NC(=O)c1cnc2ccccc2c1
CCCCCCCCSc1nc(Cc2cn(Cc3ccc(C(=O)NCC4CC4)cc3)cn2)c[nH]1
COc1ccc(CN(C)C(=O)CCc2nc(-c3ccsc3)no2)cc1
COc1cc2c3c(n(C)c2cc1OC)C(=O)c1ccccc1C3=O
COc1cc(CCc2ccc(OC(C)=O)cc2)cc(OC)c1OC
CCOc1cncc(N2CCC[C@H](CNC(=O)c3ccccc3)C2)n1
O=C1COc2ccc(C3=C[C@H](c4ccccc4)n4ncnc4N3)cc2N1
CCCOC(=O)Cc1ccc(OCC(=O)N(CC)CC)c(OCC)c1
COCCNC(=O)c1cc(S(=O)(=O)[C@@H]2CCS(=O)(=O)C2)ccc1F
N#CCOC(=O)[C@@H](N)Cc1ccccc1
O=C(CC(c1ccco1)S(=O)(=O)c1ccccc1)c1ccccc1
O=C1NCc2c(-c3ccccc3Cl)cc(N3CCNCC3)cc2N1c1c(Cl)cccc1Cl
COc1cc(-c2nc(C3CCC3)n3ccnc(N)c23)ccc1C(=O)c1ccccc1
CC(C)C[C@@H]1CN[C@@H](CC(N)=O)C(=O)N[C@H](CCC(N)=O)C(=O)N[C@@H](Cc2c[nH]c3ccccc23)C(=O)N[C@H](Cc2ccccc2)C(=O)NCCC(=O)N1
Cn1c(=O)c2c(nc3n2CCC(=O)N3CCCN2CCN(c3ncccn3)CC2)n(C)c1=O
CC[C@H](C)Oc1c(Br)cc(/C=C2\C(=O)NC(=S)N(c3cccc(C(F)(F)F)c3)C2=O)cc1OC
O=C(C[C@@H](NC(=O)c1ccccc1)c1ccccc1)Nc1cc(C(F)(F)F)ccc1-n1cncn1
Cc1cc(C)cc(N2CC(c3nnc(N)s3)CC2=O)c1
Cc1ccc(C#Cc2ccc(/C=C3\CC(CO)(COC(=O)c4cn(C)c5ccccc45)OC3=O)cc2)cc1
CN(C)c1ccnc2sc3c(=O)n(C4CCCCCC4)nnc3c12
CCOC(=O)c1cccs1
Cc1[nH]c2ccccc2c1C1CCN([C@H](C)C(=O)Nc2nccs2)CC1
O=[N+]([O-])c1ccc([C@@H]2Nc3cc(Cl)ccc3[C@H]3C=CC[C@@H]32)cc1
CC(C)N1CCc2c(CN(C)Cc3ccco3)cncc2C1
CN(C)C(=O)N1CCN(c2nc(-c3ccc(Cl)cc3)cs2)CC1
COC(=O)[C@H](Cc1c(C)cc(C(N)=O)cc1C)NC(=O)OC(C)(C)C
CC[C@@H](C(=O)NC(C)C)N(Cc1cccc(C)c1)C(=O)CN(c1ccc(Cl)c(C(F)(F)F)c1)S(C)(=O)=O
Cc1ccccc1N1C[C@@H](C(=O)N2CCC(N3CCCC3)CC2)CC1=O
COC(=O)C1CCC(=O)N1C(c1cc(OC)c(OC)c(OC)c1)c1cccc2ccccc12
O=C1C(=O)c2ccccc2C(O)=C1CCC1CCCCC1
CC(C)CNC(=S)N(Cc1cc2cc3c(cc2[nH]c1=O)OCCO3)C1CCCC1
Cc1ccc(-n2cccc2/C=C2/SC(=O)N(CC(=O)O)C2=O)cc1
CCOc1ccc(CNC(=O)c2ccc(C[S+]([O-])Cc3ccc(Cl)cc3)o2)cc1
Cc1ccc(-c2nnc(NC(=O)[C@H]3CN(S(=O)(=O)c4ccccc4)c4cc(Cl)ccc4O3)s2)cc1
CC[C@H](C(=O)NC1CCCC1)N(Cc1ccccc1C)C(=O)CCN1C(=O)c2ccccc2S1(=O)=O
CNc1nc(C)cc(Nc2cc(Cl)cc(Cl)c2)n1
CCN(Cc1cccnc1)C(=O)c1ccc(Cl)c([C@]2(C)C(=O)N(Cc3ccc(OC)cc3OC)c3ccc(Cl)cc32)c1
CC(=O)c1ccc(OCC(=O)N(C)C2CCS(=O)(=O)C2)cc1
c1cc(N2CCCC2)c2sccc2n1
C[C@@H]1C[C@H](C)[C@@H](O)CC(=O)O[C@H]([C@H](C)CC(=O)O)C/C=C/C=C(/C#N)[C@H](O)[C@@H](C)C[C@H](C)C1
Cc1ccc(/C=C\S(=O)(=O)NCC(=O)OCC(=O)N[C@](C)(C#N)C(C)C)cc1
COc1ccccc1C1(CNC(=O)[C@](C)(Cc2c[nH]c3ccccc23)NC(=O)Nc2ccc([N+](=O)[O-])cc2)CCCCC1
COc1ccc(NC(=O)[C@@H](C)Oc2ccccc2)cc1NC(=O)c1ccco1
CCc1nn(CC(=O)NCCCN(C)Cc2ccccc2)c(=O)c2cc3sc(C)cc3n12
Cc1cc(C)c(C)c(OC[C@H](O)CN2CCCCC2)c1
COc1ccc([C@@H]2SCC(=O)N2CCN2C(=O)CS[C@@H]2c2ccc(OC)cc2)cc1
Cc1nnc(N2C(=O)c3oc4ccccc4c(=O)c3C2c2ccc(Cl)cc2)s1
O=C1N/C(=N/c2ccc(F)c(Cl)c2)S/C1=C\c1ccc(-c2cc(Cl)ccc2Cl)o1
CCC/C(=C\c1cc(OC)c(OC)c(OC)c1)C(=O)N1CCC=C(Cl)C1=O
O=C(c1ccn2c(-c3cccc(Cl)c3)nnc2c1)N1CCCCC1
Cn1nc(N)c2cn([C@@H]3O[C@H](COP(=O)(O)O)[C@@H](O)[C@H]3O)c3ncnc1c23
N#C[C@@H]1C[C@H]1c1c(C(F)(F)F)sc2nc(Cn3nc(C(F)(F)F)cc3Cl)cc(=O)n12
CCCCCn1c(SCc2ccc(C)cc2)nc2c1c(=O)n(C)c(=O)n2C
CCOc1ccc(C(=O)N[C@H](C)c2ccccc2C)cc1C
CCOC(=O)C(C(=O)OCC)C(=O)c1ccccc1C(=O)c1ccccc1
C[C@H](NC(=O)c1ccon1)c1ccc(OC2CCN(c3ccnc(OCC4CC4)c3)C2)cc1
COC(=O)CCN1CC(=O)N(CCCN2CCCC2=O)C[C@@H](OC)C1
CC(C)(C)NC(=O)[C@@H](Cc1ccccc1)N(Cc1c(Cl)cccc1Cl)C(=O)CN(c1ccc2c(c1)OCCO2)S(C)(=O)=O
CN(C[C@@H]1CCCN1CC(=O)N1c2ccccc2NC(=O)C[C@H]1C(F)(F)F)c1ccccc1
CC(C)Oc1noc2c1CNCC2
O=C1c2ccccc2C(=O)N1c1nc[nH]n1
COc1ccc(C(=O)NCc2ccccn2)c(OC)c1OC
C[C@H](NC(N)=O)C(=O)Nc1ccc2c(c1)OCCCO2
COc1ccc(C)cc1-n1ccnc(SCc2ccccc2)c1=O
CS(=O)(=O)N(CC(=O)N1CCC(C(N)=O)CC1)c1cccc(Cl)c1
CCOC(=O)CC1=Nc2c(C)nn(C)c2C2=NC(C)CN12
O=C(NC[C@H](c1ccc2c(c1)OCO2)N1CCN(c2ccccc2)CC1)c1ccc2c(c1)OCO2
C[C@H]1CC(=O)C2=C1CCCC2
O=C(O)COCc1cccc(F)c1
CC(CN(CC(O)Cn1c2ccccc2c2ccccc21)S(C)(=O)=O)c1ccccc1
Fc1cccc(OC(c2cccc(F)c2)C2CCNCC2)c1
CO[C@@H]1CCC[C@H](C(=O)N2CCC[C@H](n3nnn(-c4ccccc4)c3=O)C2)C1
CCOc1ccc(C(=O)NCC(C)C)cc1COc1ccc(Cl)cc1
CC(C)COC(=S)SC(Cn1ccnc1)c1ccc(Cl)cc1Cl
CCOc1ccc(NC(=O)CSc2nc3ccsc3c(=O)n2-c2ccc(Cl)cc2)cc1
O=C(NCc1ccco1)c1csc(-c2ccc(OCc3cc(F)cc(F)c3)cc2F)n1
Cc1cc(NC(=O)c2cccnc2Cl)ccc1-c1ccc(CO)o1
Cc1cc(C(=O)CN2C(=O)N[C@@](C)(c3ccc(C(C)(C)C)cc3)C2=O)c(C)n1Cc1cccs1
CCN1C(c2ccc(Cl)cc2)C(CNCc2ccccc2O)CC1(C)CO
CC(C)CN(C(=O)COC(=O)c1ccc(Br)o1)[C@H]1CCS(=O)(=O)C1
COc1ccc(C(=O)O)cc1S(=O)(=O)N(C)c1ccccc1F
CC(=O)N1Cc2ccccc2C[C@@H]1C(=O)NCc1cccc(C)c1
COc1ccc(N2CCN(c3nc(Cl)nc(Nc4ccc(F)cc4)n3)CC2)cc1
COc1ccc(Nc2nc(-c3cccc(C(F)(F)F)c3)nc3ccc([N+](=O)[O-])cc23)cc1OC
Cc1ccc(NS(=O)(=O)c2ccc(-c3c(C)noc3C)cc2)cc1
CCOc1ccc(NC(=O)Cn2c3ccccc3c3ncn(Cc4nc(C5CC5)no4)c(=O)c32)cc1
Cc1oc(-c2ccccc2)nc1CCOc1ccc2c(c1)CCC2C(C(=O)O)C(=O)O
O=[N+]([O-])c1ccccc1N1CCCC[C@H]1c1cn[nH]c1
Cc1c(C(=O)NC2CCN(Cc3cccnc3)CC2)oc2ccc(Cl)cc12
Cc1nc(N)nc(N)c1C1CCCCC1
Cc1cc(C)c(CNC(=O)NCCc2ccc(C)o2)c(=O)[nH]1
COC(=O)C1=C(C)Nc2[nH]c(=S)[nH]c(=O)c2[C@H]1c1ccc2c(c1)OCO2
CC1(C)CC(N(Cc2ccccc2)Cc2cccnc2)CC(C)(C)N1
CCc1cccc(C)c1NC(=O)CSc1nc2ccc(N3C(=O)c4c(Br)c(Br)c(Br)c(Br)c4C3=O)cc2s1
O=C(c1nc[nH]n1)N1CCN(C(=O)[C@H](c2ccccc2)C2CCCC2)CC1
NC(=S)N1N=C2/C(=C\c3ccc([N+](=O)[O-])cc3)CCC[C@@H]2[C@H]1c1ccc([N+](=O)[O-])cc1
Nc1cc(C(F)(F)F)ccc1OCC1CCCO1
CCOC(=O)C1CN(S(C)(=O)=O)c2cc(CC(=O)OC)ccc2O1
NCCCC[C@H](NC(=O)C(F)(F)F)C(=O)c1noc(Cc2ccc(OCCc3ccc(Cl)c(Cl)c3)cc2)n1
Cc1ccc(N2C(=O)/C(=C/c3cc(C)n(-c4ccc(-c5ccccc5)cc4)c3C)C(=O)N(c3ccccc3)C2=S)cc1C
N[C@H]1C=CCC[C@@H]1C(=O)O
CC(C)(C)NC(=O)[C@@]1(C)Cn2nc(-c3cccs3)cc2C(=O)N1c1cccc(Cl)c1
COCCCn1c(SCCOc2cccc([N+](=O)[O-])c2)nc2ccccc2c1=O
COc1ccc([C@H](C)NC(=O)c2cn(-c3cc(C)cc(C)c3)nn2)cc1OC
COC(=O)c1cc(=O)c2cc([N+](=O)[O-])ccc2[nH]1
COC(=O)c1[nH]ccc1O
CCCc1nn2c(=O)cc(COC(=O)c3cccc(NC(=O)COc4ccc(F)cc4)c3)nc2s1
Cc1nc(N(C)C)cc(C2(C)CCNCC2)n1
O=C(CNC(=O)c1ccc(-c2ccccc2)cc1)Nc1ccc(OC(F)F)cc1
O=C(c1ccccc1)c1ccc(NS(=O)(=O)c2cccc(Cl)c2)cc1
Cc1nc(COc2ccc(C(=O)N[C@H]3CCS(=O)(=O)C3)cc2)no1
COc1ccc(NC(=O)c2cc(S(=O)(=O)N3CCCCC3)c[nH]2)cc1
N=C(Sc1ccccc1)c1ccccc1
CC[C@H](Cn1ccnc1)NC(=O)c1ccc2nc(CO)[nH]c2c1
CC(C)[C@H]1CC[C@@H](C(=O)N2CCC[C@H]2C#N)N1
O=C(NCc1cccs1)C1CCC(CNS(=O)(=O)c2cccc3nsnc23)CC1
Cc1c(/C=C2/SC(=S)N(c3cccc(C(F)(F)F)c3)C2=O)c2ccccc2n1Cc1ccccc1
Cn1cc(C2=C(c3cn(CCCSC(=N)N)c4ccccc34)C(=O)NC2=O)c2ccccc21
CCOC(=O)c1c(NC(=O)Cn2nc(C(F)(F)F)cc2C)sc2c1CC[C@H](C)C2
O=C(CSc1ccc(NC(=O)c2ccco2)nn1)NC[C@@H]1CCCO1
CC1(C)[C@@H](/C=C(/Cl)C(F)(F)F)[C@H]1C(=O)O[C@H](C#N)c1cccc(Oc2ccccc2)c1
Cc1ccc(CN(Cc2ccco2)C(=O)CN2C(=O)N[C@](C)(c3ccc4ccccc4c3)C2=O)s1
COc1cc2c(cc1OC)[C@H]1CO[C@@H](C(=O)N3CCCCC3)CN1CC2
O=C(CN1C(=O)NC2(CCCC2)C1=O)N1CCN(c2ccccc2O)CC1
C[C@@H](C(=O)Nc1cccc(F)c1)N1CCN(C(=O)Nc2nnc(C3CC3)s2)CC1
COCCC1(C(=O)N2C[C@@H]3CN4CCCC[C@@H]4[C@@H]3C2)CCCC1
Cc1cc(S)nc2ccc(S(=O)(=O)Nc3ccccc3)cc12
CCCCN1C(=O)c2cccc3c(Br)ccc(c23)C1=O
CCCCNS(=O)(=O)c1cccc(NC(=O)C(=O)NCc2ccc(N(CC)CC)nc2)c1
COc1ccc(C(=O)Nc2ccccc2O)c(OC)c1
N#Cc1ccsc1NC(=O)c1cnccn1
O=C(Nc1ccc([N+](=O)[O-])cc1)[C@H]1CC(=O)N(C2CC2)C1
CCCn1c(-c2ccc(S(=O)(=O)NC(C)C)cn2)c(C#N)c2ccc(OC(F)F)cc21
C#C[C@@](C)(O)CCCC(C)(C)OCC
O=C(CCn1c(=O)c2ccccc2n(CC(=O)N2CCN(c3ccccc3)CC2)c1=O)NCc1ccco1
COc1cc2c(cc1OC)[C@H]([C@H](C)NC(=O)c1ccccc1)N(Cc1ccccc1)CC2
CC/N=C(\NCC)N/N=C/c1ccc(OCc2cn3cc(C)ccc3[n+]2C)cc1
C[C@H]1CN([C@H](C)CO)C(=O)Cc2cc(NC(=O)Nc3ccc(C(F)(F)F)cc3)ccc2O[C@@H]1CN(C)Cc1ccncc1
CC(C)c1nc(CCNC(=O)Nc2cccc(Cn3cncn3)c2)cs1
COC(=O)c1cc(C#N)c(=O)n(Cc2cc(-c3ccccc3)on2)c1
CC(C)[C@@H](CNC(=O)c1ccccc1OCc1ccncc1)c1ccccc1
Cc1ccc(C(=O)O)c(Oc2ccccc2)n1
CC(C)C[C@H](NC(=O)N1CCn2c1nc1ccccc12)C(=O)N[C@H](Cc1ccccc1)C(=O)O
CCc1ccc(N2C(=O)NC(=O)/C(=C\c3ccc(OC)cc3Cc3ccccc3Br)C2=O)cc1
COc1ccc(CNc2ccccc2[N+](=O)[O-])cc1
Cc1ccc(NC(=O)[C@@H](Cc2ccccc2)N2C(=O)[C@@H]3[C@H](C2=O)C2(Cl)c4ccccc4C3(Cl)c3ccccc32)cc1
N#Cc1nc(-c2ccccc2[N+](=O)[O-])oc1N1CCCCC1
CCCC(=O)OCCc1c(-c2ccccc2Cl)c2cc(Cl)ccc2[nH]c1=O
COc1ccc2c(=O)c3c(oc2c1)C(=O)N(CCN(C)C)[C@H]3c1ccc(Cl)c(Cl)c1
CCOC(=O)c1cc(-c2ccccc2)n(CC(=O)Nc2cc(OC)ccc2OC)c1C
O=C(c1cc(Cc2n[nH]c(=O)c3ccccc23)ccc1F)N1Cc2cccc3c2C(C1)NCC3
CCOC(=O)C(C(=O)OCC)N1CCC(N2CCO[C@@H](C)C2)CC1
Cc1cc(C(F)(F)F)c(C#N)c(SCCCn2ccnc2)n1
CCOc1ccccc1-n1c(SCC(=O)N2CCOCC2)nnc1-c1cccnc1
CCOc1ccc(-c2nc(CSc3nnc(N)s3)cs2)cc1
CNC(=O)[C@@H](C)N(Cc1cccc(Cl)c1)C(=O)Cc1ccc(F)cc1
COc1ccc(C(=O)c2ccccc2NS(=O)(=O)c2ccc(C)cc2)cc1
O=S(=O)(Oc1ccc(Cl)c2cccnc12)N1CCCCC1
Cc1cc(CN2CCN(C(=O)NCc3nc(C)cs3)CC2)on1
Cc1cc([C@H]2CCCN2c2ccc(C#N)c(C(F)(F)F)c2)no1
O=C(Nc1nc2ccccc2c2cn(-c3ccc(Cl)cc3)nc12)c1ccco1
CN(C)c1ccc(Nc2c([N+](=O)[O-])cc([N+](=O)[O-])c3cccnc23)cc1
CC1CCN(C(=O)c2c(F)cccc2OCC(=O)N[C@H](CO)Cc2ccccc2)CC1
COc1ccc(-c2cn(-c3ccccc3)c(NC(=O)CN(Cc3ccccc3)C(=O)c3ccccc3Cl)n2)cc1
O=C(Nc1cc(C(F)(F)F)cc(C(F)(F)F)c1)N[C@@H]1CCCC[C@@H]1NC(=O)c1csc(COc2ccccc2F)n1
CCC(CO)n1cnnc1-c1ccncc1
N#CCC1(n2cc(C(N)=O)c(Nc3ccc([S+]([O-])C(F)F)cc3)n2)CCC(Nc2ccc(O)cc2)CC1
CCOC(=O)c1nc(N[C@H](C)CC)c2c(C)noc2n1
N#Cc1cc(C#N)c(SCC(=O)N2CC(=O)Nc3ccccc32)nc1N
COC(=O)/C(=C/c1ccc(OC)cc1)C(C(=O)O)=C1CCCC1
Cc1cc2ncn(CC(=O)Nc3ncc(C4CCC4)s3)c2cc1C
CCOc1ccc(S(=O)(=O)Nc2nnc(C)s2)cc1
COc1ccc(OC)c(NC(=O)COC(=O)CCC(=O)Nc2cc(Cl)ccc2Cl)c1
CC[C@@H](C)NC(=O)CN1CCN(C(=O)Nc2ccc(Cl)cc2)CC1=O
CC(C)Oc1cccnc1N1CCN(C(=O)c2cc3ccccc3[nH]2)CC1
COCCNC(=O)c1sc(=S)n(-c2ccc(C)c(C)c2)c1N
O=C(/C=C/c1cccc(Br)c1)Nc1cccc(Cn2ccnc2)c1
C=Cc1ccc(S(=O)(=O)O)cc1
C[C@@H]1C(=O)NCCCN1Cc1csc(-c2ccc(C(F)(F)F)cc2)n1
CCCN(CCC)C(P(=O)(O)O)P(=O)(O)O
COc1cc(-c2nc(C(=O)NC[C@@H]3CCCO3)cs2)ccc1OCc1ccccc1
COc1ccccc1CNC(=O)CN(c1ccc(OC)c(OC)c1)S(C)(=O)=O
O=C1CCCN1C[C@@H](O)CN1CCCN(C2CCCC2)CC1
COC(=O)[C@@]1([C@@H]2CCCCCCC2=O)NC(=S)NC(=O)[C@H]1C#N
COc1ccc2c(O[C@@H]3C[C@@H](C(=O)Nc4cccc(Br)c4)N(C(=O)[C@@H](NC(=O)OC(C)(C)C)C(C)(C)C)C3)cc(-c3ccccc3)nc2c1
O=C(Nc1ccon1)N[C@@H](CO)Cc1ccccc1
COC(=O)c1ccc(CNCC[C@H]2CCC(=O)N2Cc2nccs2)cc1
O=C1CC2(CCN1)CCN(Cc1ccccc1)CC2
CC(=O)NC(C)Cc1ccc(C#Cc2cnc(N3CCC(C)(C)C3)nc2)cc1
COc1cc2c[n+](CCc3ccccc3C)c(O)cc2cc1O
COCCn1c(SCC(=O)c2cc(F)ccc2OC)nc2cc(Cl)ccc21
O=C(Cc1cc(Cl)c2c(c1)OCCCO2)N1CCN(c2ccc(C(F)(F)F)cn2)CC1
CCOc1ccc(CN(C(=O)c2cc3ccccc3oc2=O)[C@@H]2CCS(=O)(=O)C2)cc1
COc1cc2c(cc1OC)C(C(=O)O)C(c1ccccc1)N(C)C2=O
COc1ccc(C(O)CNC(=O)c2ccccc2)cc1
O=C(N[C@H]1CCCC[C@@H]1O)C1CN(Cc2ccc(Br)nc2)c2ccccc2O1
Cn1cc(-c2cc(-c3ccc(N)nc3)ccc2OCC2CC2)c2cc[nH]c2c1=O
N#Cc1c(NC(=O)CN2CCC[C@@H]2c2ccc3c(c2)OCCO3)sc2c1CCC2
CC1(C)[C@H]2OCC[C@@H]2[C@H]1NC(=O)NCc1cnn(-c2ccccc2)c1
O=C(Cc1cccc(F)c1)NCCn1cc(-c2nc(-c3ccccn3)no2)nn1
CC(C)CCNC(=O)CN(Cc1ccc2c(c1)OCO2)C(=O)Cn1nnc(-c2cccs2)n1
Cc1ccccc1-c1nnc(NC(=N)NCCN)s1
COc1cc(CNCCSc2nnnn2C)cc(Br)c1OCc1ccccc1F
COc1cc2c(cc1OC)CN(C(=O)Nc1ccccc1)[C@@H](C(=O)NCc1ccccc1)C2
CCCc1ccc(OCCNC(=O)c2ccc(N(C)S(=O)(=O)c3ccc(OC)cc3)cc2)cc1
CNC(=S)N/N=C(\C)c1ccc(N2CCOCC2)cc1
CCC(=O)N(CCOC)CC(=O)N1N=C(c2ccc(C)c(C)c2)C[C@@H]1c1ccc(OC)c(OC)c1
CCC[C@@H]1NC(=O)[C@H](C)NC(=O)C[C@H](CC(C)C)NC(=O)[C@H](Cc2cn(CN(C)C)c3ccccc23)NC1=O
Cc1cc(C)n(CC(=O)N2CC[C@@H](Oc3ccccc3)C2)n1
COc1cc(=O)n2c(c1C(=O)N(C)Cc1cscn1)CCN(C(=O)c1cccc(C)c1C)CC2
Cc1ccc(C(=O)COC(=O)[C@@H](Cc2ccccc2)N2C(=O)[C@@H]3[C@@H](C2=O)[C@H]2C=C[C@H]3C2)cc1
CC1(C)CC(=O)C2=C(C1)Nc1ccccc1N[C@@H]2c1ccccc1O
CCOP(=O)(OCC)C(NC[C@]1(C)CCC[C@]2(C)c3ccc(C(C)C)cc3CC[C@H]21)c1ccc([N+](=O)[O-])cc1O
CC(=O)Nc1ccc(S(=O)(=O)Nc2ccc(Cl)cc2)cc1C
Cc1nc2nc(C(F)(F)F)nn2c(C)c1CCC(=O)N[C@H](CC1CCCCC1)c1ccccc1
Cc1noc(C)c1/C=C\C(=O)Nc1ccccc1C(C)(C)C
CCOC(=O)c1sc(NC(=O)CSc2nnnn2-c2ccc(C)cc2)c(C(=O)OCC)c1C
CC[C@@H](Nc1cc(C(=O)N2CCCC2)ccn1)C(=O)O
C[C@H](NC(=O)C1CCN(C(=O)c2cccs2)CC1)c1ccccc1
CCOC(=O)Cc1c(C)nc2cc(-c3ccc(C)cc3)nn2c1O
CC(C)c1ccc(C(=O)NC(=S)Nc2ccc(C(=O)O)cc2NC(=S)NC(=O)c2ccc(C(C)C)cc2)cc1
C[C@H](C(=O)NC1CCCC1)N(Cc1ccc(F)cc1)C(=O)CN(c1cc(C(F)(F)F)ccc1Cl)S(C)(=O)=O
CC(C)c1onc(-c2c(Cl)cccc2Cl)c1CNc1nc2ccc(-c3cccc(C(=O)O)c3)cc2s1
CCCC(=O)O[C@]1(C)CCC[C@@](C)([S+](C)[O-])C[C@H]2O[C@@H]1[C@H]1[C@@H]2[C@](C)(OC(C)=O)CC[C@@H]1C(C)C
CC(C)N1C[C@H](O)C[C@H]1c1nnc2n1CCN(C(=O)c1ccncc1)CC2
C[C@H]1CN([C@H](C)CO)C(=O)Cc2cc(NC(=O)Nc3ccc(C(F)(F)F)cc3)ccc2O[C@@H]1CN(C)Cc1ccc2c(c1)OCO2
NC(=O)N/N=C1/C[C@@H]2CCCC[C@@H]2C1
CN1CCN(C(=O)c2ccc3c(c2)[nH]c2c(C(N)=O)ccc(-c4cccc(NC(=O)c5ccc(F)cc5)c4F)c23)CC1
O=C(O)[C@@H](Sc1nccc2oc(-c3ccccc3)c(-c3ccccc3)c12)c1ccccc1
C[C@H](Nc1ccc(C#N)cc1[N+](=O)[O-])C(=O)NC1CCCC1
CC1CC(C)CN(c2ncnc3[nH]c4ccc(C(N)=O)cc4c23)C1
CC[C@H](Sc1ncccc1C(=O)OC(C)C)C(=O)NCc1ccco1
CCOC(=O)c1ccc(-n2ccnc2)c(NC(=O)c2ccc(Cl)cc2)c1
CCOC(=O)N1CCN(CC(=O)Nc2cc(C(F)(F)F)ccc2Cl)CC1
C/C=C(\C)C(=O)O[C@@H]1[C@@H]2OC[C@]3(C)[C@H](OC(C)=O)C[C@H](O)[C@](C)([C@H]4C[C@H](OCC)O[C@H]5C[C@@H](C6=CCOC6=O)C(C)=C5[C@]14C)[C@@H]23
COc1cc(C)c(S(=O)(=O)CC(=O)N(C)C(C)C)cc1OC
O=C1NC(=S)S/C1=C\c1c(C(F)(F)F)nn(-c2ccccc2)c1N1CCN(c2ccc(Cl)cc2)CC1
CCCCCCCCCCCCCCCCCC[C@@]1(C(=O)OCC)CCC[C@@H]1OP(=O)([O-])OCC[N+](C)(C)C
COc1ccccc1CN1CCCN(c2ccc(NC(=O)c3cccs3)cc2)C1=O
CCn1cc(C(=O)O)c(=O)c2cc(F)c(N3CCN(c4ccccc4OC)CC3)c(OC(F)F)c21
Nc1cc(CN2CC[C@@H](NC(=O)CNC(=O)c3cc(C(F)(F)F)ccc3N)C2)ccc1Cl
CCc1nc(C)cn1[C@H]1/C(=N/O)[C@H]2CC[C@H]1C2
COc1cc(C(=O)NCC2=CCC3NC(=O)NC3=C2)ccc1-c1cn[nH]c1
O=C(/C=C/c1ccc(O)c(O)c1)Nc1ccccc1Br
CCc1cc(Br)ccc1N1C(=O)C2CC=CCC2C1=O
C[C@@H]1CN(CCNCc2c[nH]nc2-c2cccs2)C[C@@H](C)O1
COc1ccc(OC)c([C@@H]2C(C(=O)c3ccc(Cl)cc3)=C(O)C(=O)N2c2cc(C)on2)c1
Cc1cccc(NS(=O)(=O)c2ccc3c(c2)oc(=O)n3Cc2noc(C3CCC3)n2)c1C
Cc1ccccc1-c1cnc(NC(=O)C[C@@H]2CCOC2)s1
O=C(NCCc1csc2nc(-c3ccc(Cl)cc3)nn12)C(=O)Nc1ccc2c(c1)OCO2
CC/C=C/C/C(C)=C/Cc1[nH]c(=O)c(C)c(O)c1CCC
COc1cccc(OCc2nc3c(c(=O)n(C)c(=O)n3C)n2C)c1
CN(C)CCNCc1cc(-c2ccnc3cc(Cl)ccc23)ccc1O
CN(C)c1cccc(-c2csc(NC(=O)C(=O)O)n2)c1
O=C(Cn1nc(-c2ccc3ccccc3c2)ccc1=O)Nc1ccc(F)cc1F
N#Cc1ccc(S(=O)(=O)N2C[C@@H]3CCCN4CCC[C@@H]([C@H]34)[C@H]2CCCCN2CCOCC2)cc1
O=C(O)c1ccccc1NS(=O)(=O)c1ccc(NN=Cc2cccc(Cl)c2)c([N+](=O)[O-])c1
CCC1C2Cc3ccc(O)cc3C1(CC)CCN2C
COc1cc2c(cc1OC)C1(CCN(Cc3ncc[nH]3)CC1)OCC2
COc1cc(OC)c(NC(=O)NCc2ccnc(N(C)C)n2)cc1Cl
NSc1nc2ccccc2s1
CC1=Nc2c(c(O)nn2C2CCCCCC2)[C@@H](C(F)(F)F)S1
CC(C)(O)C#Cc1ccc(C(=O)N(Cc2ccncc2)C2CC2)cc1
COC(=O)[C@@H](C)Oc1c(OC)cc(/C=N\n2c(C(C)(C)C)nc3ccc(Br)cc3c2=O)c(Br)c1Br
Cc1cc(=O)cc(C(=O)N[C@H](C)c2nc(-c3ccncc3)no2)[nH]1
CNCc1ccc2nc(-c3coc(Cc4cc(Cl)ccc4OCC(C)C)n3)[nH]c2c1
COC(=O)n1c(=O)nc2c3c(ncn21)Oc1c(c(-c2ccccc2)nn1-c1ccccc1)C3c1ccc(Cl)cc1
CCN(CC)C(=O)C1CCN(S(=O)(=O)c2c(C)noc2/C=C/c2ccccc2OC)CC1
CNC(=O)[C@@H](C)N(Cc1ccc(F)cc1)C(=O)CN(c1ccc(Oc2ccccc2)cc1)S(=O)(=O)c1ccc(C)cc1
O=C(COc1ccc(-c2nnco2)cc1)NCc1ccccc1Cl
CC(C)c1nc2c(c(-c3ccc(F)cc3)c1/C=C/P(=O)(O)C[C@H](O)CC(=O)O)CCCc1ccccc1-2
Cn1c(NC(=O)c2ccccc2)nc2c(Cl)cccc21
CC(C)n1cnc2c(NCc3ccc4ccccc4c3)nc(N3CCCCC3CCO)nc21
Cc1ccc(S(=O)(=O)N(CCCNCCCCN)Cc2c3ccccc3cc3ccccc23)cc1
CN(C)CCn1c(=O)c2ccc(NCCN(C)CCN(C)CCNc3ccc4c(=O)n(CCN(C)C)c(=O)n5c6ccccc6c(=O)c3c45)c3c(=O)c4ccccc4n(c1=O)c23
O=C(O)CC1CCn2c1c(Sc1ccc(Cl)c(Cl)c1)c1cnccc12
CC(C)N(C(=O)CN1C(=O)C[C@@H](N(C)C)C1=O)C(C)C
O=[N+]([O-])c1ccc(OCCOCCOc2ccc([N+](=O)[O-])cc2)cc1
CCOC(=O)[C@](C)(Br)c1ccccc1
COc1ccc([N+](=O)[O-])cc1NC(=O)/C=C/c1cnc2ccccc2n1
O=C(/C=C/c1cc(CO)cs1)N(Cc1c(F)cccc1Cl)C1CC1
CC1(C(=O)Nc2cccc(C#N)c2)CCN1C(=O)CCc1ccccc1
CCOP(=O)(OCC)C(F)(F)C(=O)O
NC(=O)C1CCN(c2ccc3cccc(OCC(=O)N4CCN(c5ccccc5)CC4)c3n2)CC1
O=C1CN(C(=O)COC(=O)c2ccc(Sc3ccccc3)c([N+](=O)[O-])c2)c2ccccc2N1
COc1c(O)cc2oc3cc4c(c(O)c3c(=O)c2c1CC=C(C)C)C=CC(C)(C)O4
CCN1C(=O)C(c2cc(-c3cnn(C)c3)c(O)cc2O)C(=O)N(c2ccccc2)c2cc(C(F)(F)F)ccc21
Cc1c(C=C2C(=O)NC(=O)NC2=O)c2ccccc2n1Cc1ccccc1Br
COc1cc(OC)c2c(=O)c(OCCOC(=O)/C=C/c3cc(OC)c(OC)c(OC)c3)c(-c3ccc(OC)c(OC)c3)oc2c1
C=C1[C@@H]2CC(=O)c3c(ccc(C(C)C)c3OC)[C@@]2(C)CC[C@@]1(O)CO
CC(CN(C)N=O)c1ccccc1
Cc1ccc2nc(-c3cc(NC(=O)CSc4ccc(Cl)cc4)ccc3Cl)oc2c1
COC(=O)c1ccc(S(=O)(=O)NCC2(c3ccccc3)CCC2)cc1
CC(=O)N1CCc2c(sc(NC(=O)CSc3ccc(C)cc3)c2-c2nc3ccccc3s2)C1
O=C1OCc2c1cc1cc(OCc3cccc(C4(O)CCOCC4)c3)ccc1c2-c1ccco1
N#Cc1ccc(-c2cn3c4c(sc3n2)CCCC4)cc1
COc1ccc(NC(=O)N2CCN3CCNC(=O)[C@H]3C2)cc1OC
N=C(N)NCCCC(NC(=O)CN1CCN(S(=O)(=O)c2ccc3c(Cl)cccc3c2)CC1=O)C(=O)c1nccs1
CCCc1c(OCCCCCOc2ccc(-c3nn[nH]n3)cc2)ccc2c1ccn2CC(C)(C)C
COc1ccc(C)cc1S(=O)(=O)N(CC(=O)NCCCN1CCOCC1)c1ccc(C)cc1
c1ccc(CN2CCO[C@@H](c3nc([C@H]4CCOC4)no3)C2)cc1
CCCCNCc1cccc(C)c1C
C[C@H]1CN([C@@H](C)CO)C(=O)c2cccc(NC(=O)C3CC3)c2O[C@H]1CN(C)Cc1ccc(-c2ccccc2)cc1
CCc1nn(-c2ccccc2)c2nc(C3CCN(C4CCNCC4)CC3)[nH]c(=O)c12
CO[C@@H]1[C@@H](O)[C@@H](O)[C@H](Oc2ccc3cc(NC(C)=O)c(=O)oc3c2C)OC1(C)C
O=c1/c(=C/Nc2ccccc2O)sc2ncnn12
Cc1nn(C)c(C)c1[C@H](C)C(=O)N[C@@H]1CCCC[C@H]1OCCC(C)C
CCc1cc2c(N3CCC[C@H](C(=O)NCCCN4CCN(c5ccccc5)CC4)C3)ncnc2s1
O=C(Nc1ccc(N2CCOCC2)nc1)c1sccc1-c1ccccc1
C[C@H](C(=O)NO)N1CCNc2cc(Oc3ccccc3)ccc2S1(=O)=O
Cc1cc(N2CCN(C(=O)NCCC(=O)O)CC2)nc(-c2ccccc2O)n1
CC(C)c1ccc(N/C(=N\C(=O)c2ccc3c(c2)OCO3)NC[C@H]2CCCO2)cc1
O=C(/C=C/c1cccnc1)NCCCCN1CCN(C(c2ccccc2)c2ccccc2)CC1
COc1ccc(-n2c(SCC(=O)Nc3ccc(C)cc3)nc(=O)c(Cc3ccccc3)c2O)cc1
Cc1cccc(NS(=O)(=O)c2cc(C(=O)Nc3ccccc3C(C)C)ccc2Cl)c1C
Cc1nnsc1/C(Br)=C(/NC(=O)c1ccccc1)C(=O)N1CCOCC1
N#Cc1cccnc1NCc1cccc(Cn2cccn2)c1
CCc1cccc2c(C(C(=O)c3ccc(OC)cc3)c3c[nH]c4c(CC)cccc34)c[nH]c12
CC[C@@H](C(=O)NC(C)(C)C)N(Cc1ccccc1C)C(=O)CN(c1ccccc1Cl)S(=O)(=O)c1ccccc1
CCn1c(SCC(=O)N(C)CC(=O)Nc2ccc(F)cc2)nc2ccccc21
c1ccc(CNc2nc(NCc3ccccc3)nc(NCc3ccccc3)n2)cc1
COc1ccc(CCN2C(=O)C(O)=C(C(=O)c3ccc(F)cc3)[C@H]2c2ccc(C(C)(C)C)cc2)cc1OC
CC(=O)N(C)C1CCN(C(=O)N[C@@H]2C[C@H]3CC[C@@]2(C)C3(C)C)CC1
Cc1ccc(-c2cc3c4nnc(CCC(=O)NCCC(C)C)n4ccn3n2)cc1C
CN(C)C(=O)C1(c2ccccc2)CCN(CCN2C(=O)COc3ccccc32)CC1
O=C(Cn1cnnn1)Nc1ccc(C(=O)NC2CCCCC2)c(O)c1
Cc1ccccc1OCCN1C(=O)/C(=N\O)c2cccc(C)c21
CC1(C)N=C(N)N=C(N)N1c1cccc(S(N)(=O)=O)c1
COC(=O)c1sc2ccccc2c1C#Cc1ccc(OC)cc1
CNc1nnc(-c2ccc3[nH]cc(-c4ccccc4F)c3c2)s1
CCN(CCCNC(=O)[C@@H]1c2ccccc2C(=O)N(CC(C)C)[C@@H]1c1cccs1)c1cccc(C)c1
[O-][N+]1(CC[N+]2([O-])CCCCC2)CCCCC1
NC(=O)c1cccnc1C[C@@H]1COc2ccccc2C1
Cc1ccc(OCCOCCOc2ccc(Br)cc2/C=C2\SC(=S)NC2=O)cc1
CC(=O)c1cccc(NC(=O)CCCn2c(C)csc2=O)c1
C=CC(=O)NCCCC[C@H](NC(=O)Cc1ccccc1)C(=O)N1CCN(c2ccc([N+](=O)[O-])nc2)CC1
CC[C@H](C)OC(=O)CN1C(=O)S/C(=C\c2ccc(OCC(=O)Nc3ccccc3C)cc2)C1=O
C[C@H](NS(=O)(=O)c1ccc(-c2c(C#N)c3cnc(Cl)cc3n2C2CCC2)nc1)C(F)(F)F
NC(=O)Cn1nc(-c2ccc(Cl)cc2)ccc1=O
COc1ncc(C(C)C)cc1-c1cnc(N2[C@H](C)CC[C@H]2C)nc1CN1C(=O)O[C@H](c2cc(C(F)(F)F)cc(C(F)(F)F)c2)[C@@H]1C
CCOC(=O)c1nn(-c2ccccc2C)c(=O)cc1OCC(=O)Nc1ccc(OCC)cc1
Cc1c(C(=O)NC[C@H]2CN3CCC[C@H]3CO2)sc2cccc(F)c12
COc1ccc(OC)c(SCS(=O)(=O)NCCc2c(CCOc3ccc(C(=O)O)cc3)c3cc(Cl)ccc3n2C(c2ccccc2)c2ccccc2)c1
COCCCn1cnnc1CNC(=O)c1ccc(O)cn1
C[C@H](NC(=O)c1cc2scc(Br)c2n1CC1CCC1)c1ccccc1
NS(=O)(=O)c1nnc(NC(=S)NC(=O)Nc2ccccc2)s1
CS(=O)(=O)c1cccc(C(=O)N[C@@H]2COc3ccccc3C2)c1
CCc1cnccc1-c1noc(C2CCOCC2)n1
CC[C@H](C)[C@H](NC(=O)[C@@H]1Cc2c([nH]c3ccccc23)[C@@H]2c3ccccc3C(=O)N12)C(=O)NCc1ccc(C)cc1
Cn1c(=NC(=O)CCN2C(=O)[C@@H]3CCCC[C@H]3C2=O)sc2ccccc21
COc1ccc(CN2C(=O)C(O)=C(c3ccc(C)cc3)[C@@H]2c2ccc(Cl)cc2)cc1
COc1cccc(-c2nc(CSc3nc(CN4CCOCC4)nc4ccccc34)cs2)c1
N#Cc1ccc(S(=O)(=O)N[C@H]2CCC[C@@H]2CN)c(F)c1
Cc1cc(C)cc(C(=O)N2CCC[C@@H](C(=O)N(C)[C@@H](C)CCO)C2)c1
CC(=O)N[C@H]1CC[C@H](CCNC(=O)C2CCC2)O[C@@H]1CO
CC1(C)NC(=O)N(CCC(=O)Nc2cccc(C(F)(F)F)c2)C1=O
COC(=O)c1ccc(S(=O)(=O)NC2(CN)CCCC2)cc1Cl
CN1CCN(c2nc(Nc3ccc(O)cc3)nc3ccccc23)CC1
CC(C)(C)OC(=O)NC(Cc1ccc(OC(C)(C)C)cc1)C(=O)N[C@H]1CC[C@H](C(=O)O)C1
COc1ccc(CCCCc2cc3c(cc2OC)OCO3)cc1
COc1ccc(-c2nc3cc(OC)ccc3nc2-c2ccccc2)cc1
COC(=O)c1ncccc1N1CCN(C(=O)CN2CCOCC2)CC1
O=C(Cc1ccccc1)NC[C@H](c1cccs1)N1CCCCC1
COc1ccc(OC)c(/C=C2\NC(=O)NC2=O)c1
Cc1ccc2c(c1)[n+]([O-])c(C#N)c(-c1ccc(F)cc1)[n+]2[O-]
CCOC(=O)c1ccc(NC(=S)NCCSC2CCCCC2)c(C)c1
O=C1CCNC(=O)N1C(CCc1ccncc1)COc1ccc(-c2cccc([N+](=O)[O-])c2)cc1
CCn1c2ccccc2c2nnc(SCC(=O)OCC(=O)N(c3ccccc3)c3ccccc3)nc21
CC1=CSC2=NC(=O)/C(=C\c3cc(C)n(-c4cccc(Cl)c4C)c3C)C(=N)N12
C(=C/c1ccc(-c2ccccc2)cc1)\CCCCCCCCCOC[C@@H]1CCCN1
C[C@H](NC(=O)[C@H]1C[C@@H]1c1ccccc1Br)C1CC1
CSCC[C@@H](NC(=O)C[C@@H]1Sc2ccc(Cl)cc2NC1=O)c1nc2ccccc2s1
N#Cc1c(Cn2c(=O)n(C[C@H]3CC[C@H](C(=O)O)CC3)c(=O)c3ccccc32)cccc1C(F)(F)F
O=[N+]([O-])c1ncn(Cc2ccc(Br)cc2)n1
CN1CCN(CCCNc2ncc3cc(-c4c(Cl)cccc4Cl)c(NC(=O)Nc4ccc(Cl)c(Cl)c4)nc3n2)CC1
CCCCCCN(CCC(=O)NCCOC)C(=O)c1cnccn1
COc1cccc(N2C(=O)[C@@H](N)[C@H]2c2ccc(C)cc2)c1
CCn1c(COc2cccc(OC)c2)nnc1SCCSc1nnc(COc2cccc(OC)c2)n1CC
Cc1ccc(CN2C(=O)N/C(=C/c3cn(C)c4ccccc34)C2=O)cc1
O=C(CN1CCC2(CCC(=O)N(C[C@@H]3CCCO3)C2)CC1)NCc1ccccc1
CCCNC(=O)CCNC(=O)[C@H](O)C(C)(C)CO
COc1ccccc1NC(=O)CN1C(=O)N/C(=C\c2ccc(-c3ccc(Cl)cc3Cl)o2)C1=O
CCCC(=O)Nc1cncc(-c2nnc(S)n2C)c1
Cn1nc(CO)c2c1CCN(C(=O)CCc1nc3ccccc3[nH]c1=O)C2
C/C=C(\C)C(=O)NCCN1C2=NC[C@H](Cc3ccccc3)N2C[C@H]1Cc1ccc(O)cc1
C[C@H](Nc1ncnc(N)c1C#Cc1cccc(CN)n1)c1nc2cccc(Cl)c2c(=O)n1-c1ccccc1
COc1ccc(CNC(=O)Cn2c(=O)n(-c3ccc(C)cc3C)c(=O)c3sccc32)cc1
Cc1ccc2nc(-c3ccccc3)c(N=O)n2c1
COc1ccccc1/C=C\C(=O)NCc1cccnc1-n1cncn1
CN(CCCCCCOc1ccc2c(=O)c3ccccc3oc2c1)Cc1ccccc1
COC(=O)c1cccc(C(=O)N2CCCC(C(=O)c3ccccc3OC)C2)c1
CCCCC/C(NC(C)CCCN(CC)CC)=C1\C(=O)C(CCSC)N(C(=O)CC(C)CC(C)(C)C)C1=O
CCN(CC)S(=O)(=O)c1ccc(N2CC(O)C2)c([N+](=O)[O-])c1
CCOc1ccc(S(=O)(=O)N(CC(=O)N(Cc2ccc(Cl)cc2)[C@H](C)C(=O)NC)c2ccccc2)cc1
O=C(O)CCn1c2ccccc2c2ccccc21
Cc1nn(C)c(C)c1S(=O)(=O)N1CCN(C(=O)c2ccc(Br)o2)CC1
Cc1ccc(CSc2ccccc2NC(=O)N(C)C[C@@H](O)CO)cc1
O=C(Nc1nc2cc(C3(O)c4ccccc4C(=O)N3Cc3ccccc3)ccc2[nH]1)N1CCCCC1
COC(=O)c1cc(S(=O)(=O)Nc2cc(C)ccc2OC)c[nH]1
O=C(OCc1ccccc1)c1cc(-c2ccccc2)[nH]n1
CN(Cc1cc(C(C)(C)C)n[nH]1)C(=O)NCc1cc(O)ncn1
COc1cc(C(=O)NC(=S)N2C[C@H]3C[C@H](C2)c2cccc(=O)n2C3)cc(OC)c1OC
COc1cccc(C(=O)CN2CCCC[C@H]2C(=O)N[C@@H](Cc2ccccc2)C(=O)N[C@H](C(=O)N[C@@H](Cc2ccccc2)C(=O)N[C@@H](C)c2ccccc2)C(C)C)c1
COc1ccc(NC(=S)N[C@@H](C)c2ccc(C)c(C)c2)cc1Cl
CN(C)Cc1c(O)ccc2[nH]cnc12
O=C(Nc1ccc(F)cc1F)c1cccnc1Oc1cccc(C(F)(F)F)c1
Cc1ccc(C(C)C(=O)O)cc1
CCCC(CCC)CN(NC(=O)c1ccc(CN2CCN(C)CC2)cc1)c1nc(C#N)ncc1Br
O=c1[nH]c(Cc2cccc3cccnc23)nc2ccccc12
CCCC[C@H](NC(=O)OC(C(C)C)C(C)C)C(=O)C(=O)Nc1cnccn1
Cc1cc(C)c(NC(=O)[C@@H]2CCN(S(C)(=O)=O)c3ccccc3O2)c(C)c1
Cc1ccc(-c2nc(CNC(=O)c3cc(C)on3)cs2)cc1
N#CCC#N
CCCO[C@H]1OC(=O)c2ccccc21
CN(c1ccccc1)S(=O)(=O)c1ccc(Cl)c(C(=O)Nc2ccccc2N2CCCCC2)c1
CC(C)(C)NC(=O)NC[C@@H]1Cc2ccccc2CN1/C(S)=N/C[C@H]1CCCN1C(=O)c1ccccc1
C[C@H](C[C@@H](C)NC(=O)OC(C)(C)C)NCC[C@H]1CCCO1
CNCC[C@H](Oc1cccc2sc(C#N)cc12)c1ccccc1
Cc1cc(SCC2=NNC(=O)/C2=C\N(C)C)c(Cl)cc1Cl
COc1ccc(/C(O)=C2\C(=O)C(=O)N(CCCN(C)C)[C@@H]2c2ccc(Br)cc2)cc1OC
CC(=O)OCCC[N+](C)(C)C
CCc1ccccc1N1CCN(C(=O)c2cc(OC)c(OC)c(OC)c2)CC1
O=C(NCCCn1ccnc1)c1cnn2c(C(F)(F)F)cc(-c3ccccc3)nc12
COc1cccc(Nc2ncnn3ccc(CN4CC[C@@H](N)[C@H](O)C4)c23)c1
COc1ccc(Cl)cc1/C=C1/SC(=S)N=C1O
O=C1CC(C(=O)O)C2(CCN(C(=O)Nc3ccccc3Cl)CC2)N1
Cc1ccccc1-n1cnnc1SCC(=O)N[C@@H](c1ccc2c(c1)OCCCO2)C(C)C
COc1cccc(NC(=O)/C(=C/c2ccc(N(C)C)cc2)NC(=O)c2ccccc2)c1
CCOc1ccc([C@@H](C)NC(=O)c2cc(C)c(C)cc2C)cc1OCC
O=C(CSc1ncc(-c2ccc(Br)cc2)n1-c1cccc(C(F)(F)F)c1)Nc1ccc(Cl)cc1
COc1ccc(C)c2sc(N(CCN(C)C)C(=O)/C=C/c3cccs3)nc12
COc1cc(/C=C/C(=O)/C(CC(=O)O)=C(O)/C=C/c2ccc(O)c(OC)c2)ccc1O
Cc1ccc(CCC(=O)N2C[C@H]3COC[C@@H](C2)C(=O)N3C)c(C)c1
Cc1nn(-c2ccccc2)c(C)c1CC(=O)Nc1ccc2nc(N3CCOCC3)sc2c1
O=C(CNc1ccccc1)NN=C1CCCC1
CCOc1ccc(-c2cc(=O)c3cc(NC(=O)c4ccccc4F)ccc3o2)cc1
Cc1cc(C)c(NC(=O)c2sc(NC(=O)c3ccoc3)nc2C)c(C)c1
Cc1nc(CCC2CCN(Cc3ccccc3Cl)CC2)no1
Cc1[nH]nc2c1CN(C(=O)[C@@H](c1ccc3c(c1)OCO3)N(C)C)CC2
O=[N+]([O-])c1cccnc1NC[C@H](O)c1cccc(C(F)(F)F)c1
CCCCNC(=O)[C@H](C)N(Cc1ccc(Cl)cc1Cl)C(=O)CN(c1ccc(F)c(F)c1)S(C)(=O)=O
O=C(NCCCOCc1ccco1)N1CCOC2(CCCC2)C1
NC(=O)c1cccc([C@@H]2C[C@@H]3CC[C@H](C2)N3CCN(CC2CCC(C(F)(F)F)CC2)C(=O)[C@@H](O)CO)c1
CCCNC(=O)[C@H](C)N(Cc1ccccc1C)C(=O)CN(c1ccc2c(c1)OCCO2)S(=O)(=O)c1ccccc1
C[C@@H]1CC[C@]2(O[C@@H](CCO)C[C@H](O)[C@H]2O)O1
COc1ccc(CNC(=O)Cn2c(=O)oc3cc(S(=O)(=O)N4CCCCCC4)ccc32)cc1
Nc1nc2c(ncn2C2C=CC(OCP(=O)(O)OP(=O)(O)C(F)(F)P(=O)(O)OP(=O)(O)COC3C=CC(n4cnc5c(N)ncnc54)C3)C2)c(=O)[nH]1
CN(Cc1ccc(Cl)cc1)c1nc(O)cc(C(F)(F)F)n1
CCOc1cc(/C=C2/S/C(=N\c3ccc(C(=O)O)cc3)N(CC)C2=O)ccc1OC
Cc1ccc(NC(=O)C2=Cc3sc(C)c(C)c3CS2)c(Cl)c1
CS(=O)(=O)Nc1cccc2c(O)cc(C(=O)Nc3ccccc3F)nc12
CCC[C@@H]1CCC[C@@H](CCC)N1Cc1ccccc1
NC(=S)N/N=C(\c1cccnc1)c1cccc(Br)c1
CCc1c(C(=O)Nc2cc(S(=O)(=O)Nc3ccccc3OC)ccc2O)[nH]c(C)c1C(C)=O
O=C(CN1CCN(c2nnc(-c3ccccc3)c3ccccc23)CC1)Nc1ccccc1
O=C(c1ccc(-c2cc(Cl)cc(Cl)c2)s1)N1CCC[C@H](c2nc(=O)[nH][nH]2)C1
COc1cc(/C=C2/CCc3c(cnn3C)C2=O)cc(OC)c1O
CC(C)c1ccc(Nc2nnc(SCC(=O)N3[C@@H](C)CCC[C@H]3C)s2)cc1
O=C(N[C@@H]1CCS(=O)(=O)C1)C1CCN(S(=O)(=O)c2cccs2)CC1
CC(C)c1ccc(OCC(=O)Nc2nc3ccccc3s2)cc1
CC(=O)OC[C@]1(O)CC[C@@]23C[C@H]1C[C@@H]2CCC1C(C)(C)CCC[C@@]13C
CC(C)CC(=O)Nc1n[nH]c2c1CN(C(=O)C1CCN(C3CC3)CC1)C2(C)C
Nc1cccc(S(=O)(=O)N2CCN(S(=O)(=O)c3ccc4c(c3)OCCO4)CC2)c1
CC1CN(C(=O)COc2ncnc3ccccc23)CC(C)O1
CC[C@H](C)C[C@H](NC(=O)OCc1ccccc1)C(=O)O
C[C@H](Cn1cccn1)NCc1cccc(OCc2cccc(C#N)c2)c1
COc1ccc2[nH]cc(CCNC(=O)c3cc[n+](Cc4ccccc4F)cc3)c2c1
C=CCOC(=O)N1c2ccc(O)cc2[C@@]23O[C@]24[C@@H](C)CC(OC)(OC)[C@@]3(O)C#C/C=C\C#C[C@H]14
O=S(=O)(c1ccc(F)cc1)c1cc(F)c2oc3c(c2c1)CNCC3
Cc1cc(C)c(NC(=O)CNC(=O)C23C[C@@H]4C[C@H](CC(Cl)(C4)C2)C3)c(C)c1
COc1ccc(S(=O)(=O)N2CCc3ccccc32)cc1C(=O)Nc1ccc2nc(C)sc2c1
CCCOC(=O)c1cc(N)ccc1Nc1ccc(OCC)cc1
CC(C)OC(=O)COc1cc(N(C)C)ccc1C=Nn1c(-c2cc3cc(Br)ccc3o2)nc2ccccc2c1=O
C[C@@H]1CCCN(CCCNC(=O)CCn2nc(-c3ccccc3)ccc2=O)C1
CCNc1nc(N)nc2c1ncn2CC1(OCP(=O)(O)O)CC1
CC(C)c1ccc(C2=CCC(C)(C)c3ccc(C#Cc4ccc(C(=O)O)cc4)cc32)cc1
CC(=O)c1cc(CN2CCCC[C@H]2c2nc(C)no2)cs1
NC(=O)c1cccn2cc(-c3cccc(-c4cccc(F)c4)c3)nc12
C[C@@H]1CCN(C(=O)c2ccc(OC(F)(F)F)cc2)c2ccccc2S1
COC(=O)c1cc(B2OC(C)(C)C(C)(C)O2)cc(N)c1F
O=Cc1ccc(O)c2ncccc12
COC(=O)c1ccc2nc(-c3ccc(C)cc3)c(CC(=O)O)n2c1
CCn1c(SCC(=O)Nc2nc(C)cs2)nnc1[C@H](C)NC(=O)c1ccc(OC)cc1
N[C@H](Cc1ccccc1)C(=O)N[C@H]1CCC(=O)N(CC(=O)NCCC(=O)OCc2ccccc2)C1=O
Cc1ccc(NC(=O)Nc2ccc(Sc3c(C)c(C)nc4ncnn34)cc2)cc1
COc1ccc(NC(=O)C(=O)NC[C@@H](c2cccn2C)N2CCCCCC2)cc1Cl
COc1ccc([N+](=O)[O-])cc1/C=C1/SC(=O)N(Cc2ccc(Br)cc2)C1=O
CNc1nc(N(C)c2ccc(OC)cc2)c2ccccc2n1
CC(Oc1ccc(Cl)cc1)c1ccc(C#N)c(O)n1
Nc1ccc(C(=O)/C=C/c2cc3c([nH]c4ccccc43)c(-c3ccc(F)cc3)n2)cc1
O=C1c2cccc3cc4ccccc4c(c23)C(=O)N1CCNCCCNCCN1C(=O)c2cccc3cc4ccccc4c(c23)C1=O
Cc1ccc(Cl)c(OCC(=O)N(C)[C@@H]2CCS(=O)(=O)C2)c1
Cc1nc(Nc2ccc(NC(=O)c3ccccc3C(F)(F)F)cc2)cc(-n2ccnc2)n1
O=C1CNc2ccc(C(=O)N3CCC[C@H](c4cccc(C(=O)O)c4)C3)cc2N1
O=S(=O)(/C=C\c1ccccc1)N1CCN(c2ccc(S(=O)(=O)N3CCCC3)cn2)CC1
O=C(NCc1nnc2n1CCC2)c1cn(-c2ccccc2)nn1
COc1cc(CNC(=O)CCc2ccc(Cl)cc2)ccc1OC(C)C
CNC(=O)c1cccc(Sc2ccc(NC(=O)NC(=O)c3cc(OC)cc(OC)c3Cl)cc2)c1
O=C(NC(c1ccccc1)c1ccccc1)[C@@H]1CCCN(Cc2ccccc2Cl)C1
CC[C@H](C)[C@H](NC(=O)[C@H](CC(C)C)NC(=O)[C@H](CCCNC(=N)N)NC(=O)[C@@H](N)CCCNC(=N)N)C(=O)N[C@@H](Cc1ccccc1)C(=O)O
N=C(N)c1cccc(N(CCCc2ccc(-c3ccccc3S(N)(=O)=O)cc2)CC(=O)O)c1
O=C(NC[C@@H]1CC(=O)N(c2ccccc2)C1)NC(c1ccccc1)c1ccccc1
Cc1c(Cc2ccccc2)c(=O)oc2c(C)c(OC(C)C(=O)N[C@@H](Cc3ccccc3)C(=O)O)ccc12
COc1cc(Cl)c(Nc2nc(Br)cn([C@@H](COCCF)C3CC3)c2=O)c(Cl)c1
CCC(CC)C1=NN2C(=N)/C(=C\c3cc(C)n(-c4cc(Cl)ccc4Cl)c3C)C(=O)N=C2S1
COc1cc2ncc3c(N)nc(-c4cncc(OC[C@@H](N)Cc5ccc(F)cc5)c4)cc3c2cc1OC
c1ccc(-n2n[n+](C34CC5CC(CC(C5)C3)C4)nc2SC23CC4CC(CC(C4)C2)C3)cc1
O=C(O)CCc1ccc(OCc2cccc(-c3nccs3)c2)cc1
O=C(O)[C@@H]1C[C@H](O)CN1
N#C[C@@H]1C=CC=NC1=O
CCCCCCCNC(=O)c1c(C)c(-c2ccc(Cl)cc2)nc2ccccc12
CC(C)CN1CCC2(CC1)O[C@@H](C(=O)N1CCCCC1)Cn1ccnc12
CC[C@H](Sc1nc2sc(C(=O)OC)c(C)c2c(=O)n1N)C(=O)N(CC)CC
Cc1sc(NC(=O)CN2CCC(CN3C[C@H](C)O[C@@H](C)C3)CC2)c(C#N)c1C
COc1cc(Br)c(CN(c2ccccc2OC)S(=O)(=O)c2cccs2)cc1OC
NC(=O)Cn1cc(NC(=O)c2cccc(Oc3ccncc3)c2)cn1
COc1ccc2cc(S(=O)(=O)N[C@H]3COC[C@@H]3OC)ccc2c1
CCCC[C@H](NC(=O)[C@@H](Cc1ccc(F)cc1)NC(=O)[C@@H]1CCCN1C(C)=O)C(=O)N[C@@H](Cc1c[nH]c2ccccc12)C(N)=O
CC1=C(C(=O)Nc2cccc(Cl)c2)[C@H](c2ccccc2Cl)NC(=S)N1
Nc1ncc2ccc(-c3ccc(NC(=S)Nc4cc(Br)cc(C(F)(F)F)c4)cc3)cc2n1
NC(=O)c1cc(NC(=O)CCCOc2ccccc2F)ccc1Cl
CCc1csc(CNC(=O)C[C@@H]2NC(=O)c3ccccc32)n1
CC1CCc2n[nH]c(C(=O)NCCCc3ccco3)c2C1
CCOC(=O)C1=C(CC)NC2=C(C(=O)CC(C)(C)C2)C1c1ccc(-c2ccccn2)cc1
C[C@@H]1CN(CCc2ccncc2)CCN1c1nccs1
Cc1ccc(C)c(CNCCCN)c1
COc1cccc(C(=O)OCC(=O)c2[nH]c(C)c(C(C)=O)c2C)c1
O=C(CN1CCN(Cc2ccccc2)CC1)c1c[nH]c2ccccc12
CN(c1ccc(Cl)cc1)S(=O)(=O)c1ccsc1-c1nc(-c2cccc(F)c2)no1
O=C(CSc1nnc(COc2ccc(Cl)cc2)o1)NC1CCCCC1
Cc1csc([C@H](C)CNC(=O)Nc2ccc(-n3nccn3)cc2)n1
O=C(Cc1ccccc1)N1CCC[C@H](c2nnc(Cc3ccc(F)cc3)o2)C1
Cc1cccc(CNC(=O)c2cnn3c4c(cnc23)C[C@@H](C)CC4)c1
COCCN(C)c1ncc(NC(=O)c2nc(-c3ccccc3)oc2C(F)(F)F)cn1
COc1ccc(-c2ccc3c(N4CCOC[C@@H]4C)nc(N4CCC(O)(c5ccccc5)CC4)nc3n2)cc1CO
C[C@@H](C(=O)NC1CCCCC1)N(Cc1cccc(Br)c1)C(=O)CN(c1ccccc1)S(=O)(=O)N(C)C
Cc1nc(S[C@@H](C)C(=O)Nc2cccc(F)c2)n(C[C@H]2CCCO2)c1C
O=C(Nn1c(COc2ccccc2)nc2ccccc2c1=O)C(Cl)(Cl)Cl
COC(=O)[C@H](CCSC)NC(=S)N(C)Cc1cc2cccc3c2n(c1=O)CC3
Cc1ccccc1Cn1ccc(NC(=O)[C@H]2[C@@H](C(=O)O)[C@H]3C=C[C@H]2C3)n1
COCCNC(=O)CN1C(=O)NC2(CCCc3ccccc32)C1=O
CC(=O)c1cccc(NC(=O)CN2C(=O)[C@H]3CC=CC[C@H]3C2=O)c1
O=C1C[C@]2(CCSC2)C(=O)N1Cc1ccc(Cl)s1
C#CCCS(=O)(=O)N(C)[C@H](C)c1ccc(S(C)(=O)=O)cc1
CCN(CC)Cc1nc(SCc2cc(=O)n3c4c(sc3n2)CCCC4)c2c(C)c(C)sc2n1
O=C(Nc1cccc(C(F)(F)F)c1)C1CC(=O)N(CCc2ccccc2)C1
Nc1c(C(=O)Nc2ccccc2)sc2nc3c(cc12)CCCC3
CCN(CC)C[C@@H](O)COc1ccc(CNCc2ccc(F)cc2)cc1OC
CSc1ccc(NC(=O)[C@H](C)NC(=O)c2ccoc2)cc1
Nc1ncnc2c1ncn2[C@@H]1O[C@](F)(CO)[C@@H](F)[C@H]1O
Cc1nn(C)c(C)c1CCNC(=O)Nc1ccccc1C(F)(F)F
CC/C=C/CCNC(=O)OCCCc1c[nH]cn1
O=C1[C@H]2[C@@H](C(=O)N1c1cccc([N+](=O)[O-])c1)[C@@H](c1ccc(Cl)cc1)OC21C(=O)c2ccccc2C1=O
O=C(Nc1nc(-c2c[nH]c3ccccc23)cs1)c1ccc(-n2cnnn2)cc1
C[C@@H](NC(=O)c1ccccc1)c1ccc(O)cc1
COc1cccc2cc(/C=C\C(=O)Nc3ccccc3N3CCOCC3)oc12
CCOC(=O)C1=C(C)NC(C)=C(C(=O)OCC)C1c1cc(Br)cc(Br)c1OCc1cn(CC(=O)NCCC(=O)O)nn1
COc1cc(-c2onc(N(C)C)c2C(=O)NCCCc2c(C)noc2C)ccc1F
COc1ccc(CC(=O)O)cc1-c1ccc(F)c2c1CN(C(=O)NCc1cccc(F)c1)CC2
CSc1ncc(Cl)c(C(=O)Nc2c(C(=O)Nc3cccc(Cl)c3)oc3ccccc23)n1
Cc1ccc(SC(=S)NCC/C=C/[S+](C)[O-])cc1
CN(C)S(=O)(=O)N1CCC[C@H]1c1cc(CCOc2ccc(C(F)(F)F)cc2)[nH]n1
Cc1ncsc1C(=O)NCCc1nc(-c2ccccc2)ncc1C(N)=O
Cc1ncc(CN2CC[C@]23CCCN(C(=O)c2cc(C(C)(C)C)oc2C)C3)s1
Cc1csc2cc([C@H](C)Nc3ncnc(N)c3C#N)c(-c3cccc(CN(C)CCCCN4C[C@H](C)O[C@H](C)C4)c3)c(=O)n12
Cc1ccc(Cl)cc1-n1c2c(cc(C#N)c1=O)C(=O)C[C@@H](c1ccccc1)C2
Cc1ncsc1C(=O)NCCN1CCN(c2ncccn2)CC1
O=C(Nc1cccc(C(F)(F)F)c1)c1cc(-c2ccc(Cl)cc2)nc2ccccc12
O=C1Nc2ccccc2/C1=C/c1c(Cl)cccc1Cl
C#CCNC(=O)[C@@H](NC(=O)c1cc(-c2ccccc2)nn1C)[C@@H](C)O
CC(C)NC(=O)[C@]1(Cc2ccccc2-c2ccccc2)CCN(C(=O)c2ccccn2)C1
COc1ccc(/C=C2\S/C(=N/c3ccccc3)N(Cc3ccc(C(=O)O)cc3)C2=O)c(OC)c1
NC(=O)[C@H](NC[C@H]1CCCCO1)c1ccc(Br)cc1F
CCc1nc(C(=O)NCCCN2CCN(c3cccc(Cl)c3Cl)CC2)c(C)n1-c1ccccc1
COC[C@@H](C)NS(=O)(=O)c1ccc(OCC(=O)OC)c(Cl)c1
Cc1ccccc1N1CCN([C@H](C)C(=O)NC2CC2)CC1
CC1(C)CC2(CC(C)(C)N1O)NC(=O)OC2=O
CC(C)NC(=O)C(=O)c1c[nH]c2ccccc12
O=C(c1ccccc1Cl)[C@@H]1[C@@H](c2ccccc2F)C2(C(=O)c3ccccc3C2=O)[C@@H]2C=Cc3cc(F)ccc3N12
CCN1CCCC(Sc2nc3c(=S)n(C)c(=O)n(C)c3[nH]2)C1
Cc1cc(N2CCOCC2)n2nc3nc4ccccc4cc3c2n1
Cc1cc(C(=O)Nc2cccc3ccccc23)c(C)o1
CC(=O)Nc1ccc(S(=O)(=O)c2ccc(NC(=O)CCCCCCCCC(=O)Nc3ccc(S(=O)(=O)c4ccc(NC(C)=O)cc4)cc3)cc2)cc1
O=C(c1ccccc1)N1CCCN(c2c(Cl)cncc2Cl)CC1
COc1cc([C@H]2C(C(=O)c3cc4ccccc4o3)=C(O)C(=O)N2c2nc3c(C)cc(C)cc3s2)cc(OC)c1OC
Cc1cc(C)c2[nH]c(=O)c(CN(Cc3ccccc3Cl)Cc3nnnn3Cc3ccco3)cc2c1
CO[C@H](C)c1cccc(NC(=O)N2CCCC[C@@H]2c2nc[nH]n2)c1
CCCCNC(=O)c1cnc2n(c1=O)CCS2
CCOC(=O)c1[nH]c2ccccc2c1NC(=O)NC(C)C
O=C(NC1CCCC1)[C@H](Cc1ccccc1)N(Cc1ccccc1Cl)C(=O)COc1ccc(F)cc1
COc1ccc([C@@H]2CCCCCN2C(=O)c2ccc(Cl)o2)cc1
CCOc1ccc2nc(Cl)c(CN(C(=O)C3CC3)C3CCC(C)CC3)cc2c1
O=C(NCc1ccc2c(c1)OCO2)[C@H]1CC(=O)N(C2CCCC2)C1
O=C(CC(=O)NCc1ccc(Cl)cc1)NCc1ccc(Cl)cc1
CC(C)c1nc(CCNC(=O)Cn2nccc2[C@H]2CCCNC2)cs1
C#CCOc1cc(Br)c(/C=C2\SC(=O)N(CC(=O)N3CCc4ccccc4C3)C2=O)cc1OC
CCOC(=O)C1=CN(C(=O)OC(C)(C)C)C(CN2C(=O)COCC2=O)C1
CCCC[C@@H]1c2[nH]c3ccccc3c2C[C@@H](C(=O)O)N1C(C)=O
Cc1ccc(C(=O)CCC(=O)NCc2ccnc(N3CCCC3)c2)cc1C
FC(F)(F)c1cccc(N2CCN(C(=S)Nc3ccccn3)CC2)c1
COc1ccc(/C=N\c2c(O)ccc3ccccc23)cc1OC
COc1ccc(F)c(-c2ccnc(N)c2)c1
Cn1nc(C(F)(F)F)c(-c2ccc(Br)cc2)c1NC(=O)Nc1ccc(F)cc1F
Nc1cc(-n2cc(C(=O)O)c(=O)c3cc(F)c(N4CC[C@H](N)C4)nc32)ccc1F
CCc1ccc(C(=O)Nc2cccnc2Oc2ccc(Cl)cc2)cc1
Fc1ccc(COc2ccc3ccccc3c2CNn2cn[nH]c2=S)cc1
Cc1nc(-c2ccc(CNC(=O)c3ccc4[nH]nnc4c3)o2)cs1
CCn1nc(CCSC)nc1[C@@H](c1cccc(F)c1)N(C)C
CCOC(=O)C1=C(C)NC(=O)N[C@H]1c1ccc(C#Cc2ccccc2)s1
CCOC(=O)CCN(C)C(=O)c1ccc(S(=O)(=O)NC)nc1
C[C@@H](NC(=O)C[C@@H]1S/C(=N/N=C/c2ccccc2O)NC1=O)C(=O)O
Cc1c(OCCBr)ccc2c(=O)nc(N3CCSCC3)oc12
CC(C(=O)O)N(Cc1ccccc1[N+](=O)[O-])S(=O)(=O)C(F)(F)C(F)(F)C(F)(F)C(F)(F)F
O=C1CSC(c2ccc([N+](=O)[O-])cc2)N1C(=O)Nc1ccncc1
COc1ccc(NC(=O)NC(=O)COC(=O)Cc2coc3c(C)c(C)ccc23)cc1
Cc1ccccc1-c1noc(CSc2nc3[nH]ncc3c(=O)n2-c2ccccc2)n1
NS(=O)(=O)c1ccc(-c2[nH]c3ccc(Br)cc3c2-c2ccccc2)cc1
Cc1ccc([C@@H]2C(C(=O)c3ccc4c(c3)C[C@@H](C)O4)=C(O)C(=O)N2c2nc3ccc(Cl)cc3s2)cc1
Cc1cc(OCc2ccccn2)c2cccc(OCc3c(Cl)ccc(N(C)C(=O)CNC(=O)/C=C/c4ccc(N5CCCC5=O)cc4)c3Cl)c2n1
Nn1c(SCC(=O)Nc2cc(C(F)(F)F)ccc2Cl)nnc1-c1ccccn1
COc1cc(OC)cc(N2CCN(C(=O)Nc3nc4cccc(OC)c4nc3OC)CC2)c1
c1ccc(N2CC[C@@H](N3CCN(c4nsc5ccccc45)CC3)C2)cc1
COCC(=O)Nc1nc2[nH]c(C)c(C)c(=O)n2n1
Cc1noc(C)c1CN1C[C@@H](OCc2ccccn2)[C@H]2OCCC[C@H]21
CC[C@@H]1C[C@]2(C)C3=C(CCC3)CC[N+]2(C)C1
COc1ccc2c(c1)[C@H](NC(=O)CC(c1ccccc1)c1ccccc1)CC(C)(C)O2
Cc1cc(C)c2oc(-c3ccc(O)c([N+](=O)[O-])c3)cc(=O)c2c1
O=C(COc1ccc(Br)cc1)N1CCO[C@H](c2ccc(Br)cc2)C1
CCOc1ccc(-n2c(=S)sc3c(=O)[nH]c(SCC(=O)Nc4ccccc4C)nc32)cc1
CCCCC(=O)Nc1ccc(Br)cn1
O=C(/C=C/c1ccccc1)C[C@]1(O)C(=O)N(CCc2ccccc2)c2ccc(Br)cc21
Cc1cccnc1-c1c[nH]nn1
CCOc1ccc(-n2cccc2[C@@H]2[C@@H](c3ccccn3)NC(=S)N2c2cccc(C)c2)cc1
CC[C@H](C)N=c1nc(Nc2ccc(Cl)c(C)c2)cc(-c2ccccc2)[nH]1
CC(C)CNC(=O)[C@H]1O[C@H]1C(=O)N[C@@H](CC(C)C)C(=O)N1CCC[C@H]1C(=O)OCc1ccccc1
Cc1cc(NC(=O)c2cc(-c3ccccn3)nc3ccc(Br)cc23)no1
O=C1CC[C@H](O)Cc2ccc(O)c(c2)-c2cc(ccc2O)C[C@H]1O
Cc1cccc(Cl)c1Nc1ncc(-c2ccc(F)cc2)n2cncc12
Cc1nc(NCCNC(=O)Nc2ccc(F)cc2)cc(N2CCCC2)n1
COC1CCN(S(=O)(=O)N2C[C@H](c3ccc(C)o3)[C@@H](N)C2)CC1
COC(=O)C(=O)[C@@H](C(C)=O)C(=O)NCc1ccccc1
CS(=O)(=O)CC(=O)N(CCN1[C@H]2CC[C@@H]1C[C@H](c1cccc(C(N)=O)c1)C2)Cc1ccc(F)cc1
CCOc1ccc(NC(=O)[C@]23C[C@H]2CN(C)S3(=O)=O)cc1
NS(=O)(=O)c1cc2c(cc1C(F)(F)F)N[C@H](Cc1ccccc1)NS2(=O)=O
COc1ccc(-c2oc3c(OC)c(OC)c(OC)c(O)c3c(=O)c2O)cc1O
CN(Cc1nc2ccccc2c(=O)[nH]1)C[C@H](O)c1ccc(F)cc1
Cc1cccc(C2=Nc3c(c(=O)[nH]c(=O)n3-c3ccc(F)cc3)C(C(F)(F)F)(C(F)(F)F)N2)c1
Oc1ccc(Cl)cc1/C=C\C12CN3CN(CN(C3)C1)C2
CC(=O)N1CCN([C@H]2CC[C@H](Nc3ncnn4ccc([C@H]5CC[C@H](C(N)=O)CC5)c34)CC2)CC1
CC(C)CN([C@H](CO)CCCCNC(=O)N(Cc1ccc([N+](=O)[O-])cc1)Cc1ccc2c(c1)OCO2)S(=O)(=O)c1ccc(N)cc1
CC(C)(O)[C@@H]1CCCN1C(=O)N[C@@H](c1ccccc1)c1ccco1
C[C@H](c1ccc(N2CC[C@H](NS(=O)(=O)/C=C/c3ccc(Cl)s3)C2=O)c(F)c1)N(C)C
Cc1ccccc1NC(=O)CSc1nnc(-c2cccs2)o1
COC(=O)c1cc(N(C)C(=O)/C=C/c2ccco2)ccc1N1CCOCC1
CC1CCN(S(=O)(=O)c2ccc3nc(Nc4cccc(Cl)c4)ccc3c2)CC1
COc1cc(-c2nn(-c3cccc(NC(=O)Nc4ccc(Cl)c(Cl)c4)c3)cc2-c2ccncc2)ccc1Cl
O=C([C@@H]1C[C@H](Oc2ccccc2)CN1C(=O)c1ccc2ccccc2n1)N1CCCC1
N#Cc1cccc(C(=O)N2CCc3nc(-c4ccccn4)oc3C2)c1
Cc1cc(C=C2SC(=Nc3ccccc3)N(C3CCCC3)C2=O)c(C)n1-c1ccc(Cl)cc1
Cc1ccc(OCC(=O)Nc2nc(-c3ccc(F)c(F)c3)cs2)cc1
Cc1nn(-c2ccnc(Nc3ccc4oc(C)c(Cl)c4c3)n2)cc1CN1CC(O)C1
O=C(CCc1c[nH]c2ccccc12)Nc1cccc(OCc2nnc(-c3ccc(Cl)cc3)o2)c1
Cc1nn(C)cc1NC(=O)CN1CCc2nnc(Cc3ccccc3)n2CC1
NC(=O)[C@@]1(Cc2ccc(-c3cccnc3)cc2)CCCN(C(=O)CC2CCCCC2)C1
Cc1ccc(C(=O)O)cc1S(=O)(=O)N(N[C@@H]1CCS(=O)(=O)C1)[C@@H]1CCS(=O)(=O)C1
CCCCCCCCCCCCO[C@H]1C[C@H](O)[C@@H](O)[C@H](C)O1
COc1ccccc1C(=O)c1cnc(NC2CCN(C(=O)Nc3ccccc3C)CC2)nc1N
CC[N+](CC)(CC)CCCCCC[N+](CC)(CC)CCCCCC[N+](CC)(CC)CC
Cc1ccc(F)cc1C(=O)Nc1ccc(C(=O)N2Cc3ccc(C(=O)O)n3Cc3ccccc32)c(Cl)c1
CCc1c(N)nc(O)nc1O
C/C(=N/N)c1nc(N)nc(N)c1-c1ccc(Cl)cc1
Cc1ccc(NC(=O)C2CCCNC2=O)nc1
COc1ncc(Cl)c(N2CC[C@@H](OCc3ccncc3)C2)n1
CCOc1ccccc1NC(=O)CCNC(=O)c1ccco1
Nc1nc(SCC(=O)O)nc(O)c1NC(=O)c1ccco1
Cc1cnc(C[C@H]2CCCN(S(=O)(=O)Cc3ccccc3F)C2)n1CC1CC1
O=C1CCc2cccc(F)c2N1CCCN1CCC(n2c(=O)[nH]c3ccccc32)CC1
CC(=O)N([C@H]1C=C[C@@H](O)[C@@H](O)[C@@H]1O)[C@H]1C=C[C@@H](O)[C@@H](O)[C@@H]1O
Cc1ccc(S(=O)(=O)N2CCC(N3CCN(Cc4ccc(F)cc4)C3=O)CC2)c(C)c1
COc1cc(OC)cc(-c2nc3c4ccccc4n(Cc4ccccc4F)c(=O)n3n2)c1
CC(C)N1CCO[C@H]2CN(C(=O)c3ccsc3)C[C@H]21
Cc1cc(S(=O)(=O)Nc2ccccc2)ccc1OCC(=O)Nc1ccccc1Sc1ccccc1
CN(C)c1cccc(Oc2nnnn2-c2ccccc2)c1
Cc1cc(/C=N/c2ccc(Oc3ccccc3)cc2)cc(C)c1O
CSc1ncncc1C(=O)Nc1ccc(-c2ccccc2)cn1
Cc1nc(C(=O)NCCCc2nc(C(C)C)no2)no1
Cc1ccc(N2C(=O)[C@H]3[C@@H](C(=O)c4ccc(F)cc4)N4N=Cc5ccccc5[C@@H]4[C@@H]3C2=O)cc1
COc1ccc(C2S/C(=C\c3ccc(OC)cc3OC)C(=O)N2NC(=O)Cc2ccccc2)cc1
Cc1ccc(CNC(=O)NCC(=O)NC(C)(C)C)c(N2CCCC2)c1
Nc1nc(N)c(/N=N\c2ccc(S(=O)(=O)c3ccc(/N=N/c4c(N)nc(N)nc4N)cc3)cc2)c(N)n1
COc1ccc2c(C)c(CCC(=O)N=c3[nH]c4ccccc4[nH]3)c(=O)oc2c1
CCOC(=O)Cc1coc(NC(=O)CSc2ccccn2)n1
CO/N=C(\COCc1cc(C(F)(F)F)cc(C(F)(F)F)c1)C(CCN1CCN(CC(=O)N(C(C)C)C(C)C)CC1)c1ccc(Cl)c(Cl)c1
CC(C)Cc1cc(CNC(=O)N2CCNC(=O)[C@H]2c2cccc(F)c2)on1
CCc1cnc(NCCc2ccccc2)c(=O)n1CC(=O)NCc1ccc2[nH]ccc2c1
COCc1cn([C@@H]2CCN(C(=O)Cc3cccs3)C2)nn1
CCOC(=O)c1ccc2c(Cl)c(C(=O)Nc3ccc(C(=O)NCCCN(C)C)cc3)sc2c1
Cc1ccc([C@@H](C)NC(=O)c2ccc(N3CCOCC3)cc2)cc1
CNS(=O)(=O)c1cc(NC(=O)CN2CCc3cccc(C)c32)ccc1C
CCOc1cc([C@H]2Nc3ccccc3C(=O)N2CC(F)(F)F)ccc1OC
COc1ccc(/C=N/NC(=O)Cc2csc(Nc3cccc(C(F)(F)F)c3)n2)cc1C
OCCN1CCN(C[C@@H](O)COC[C@H]2COc3ccccc3O2)CC1
CCC(CC)C(=O)N1CCN(Cc2nc3c(cnn3C)c(=O)[nH]2)CC1
c1ccc2c(NC3CC3)nc(-c3ccoc3)nc2c1
Cc1cc(/C=C2\S/C(=N/c3ccccc3)N(C3CCCC3)C2=O)c(C)n1-c1ccc(N2CCCCC2)c([N+](=O)[O-])c1
Cc1nccc(O[C@H]2CCCN(S(=O)(=O)c3c(C)nn(C(C)C)c3C)C2)n1
COCc1c(-c2ccc(C(=N)N)cc2)oc(-c2ccc(C(=N)N)cc2)c1COC
Cc1ccc(C(=O)O)c([N+](=O)[O-])c1O
CC1CN(C(=O)C2CCCC2)C(C)CN1C(=O)C1CCCC1
COc1cc(C(C)=O)ccc1OCC(=O)c1cc(C)n(C2CC2)c1C
c1ccc([C@@H](Cn2cncn2)NCc2ccc3c(c2)CCO3)cc1
Cc1nc(-c2ccccc2)nc(Nc2ccc(C(=O)O)cc2)c1C
COc1cc(N2CCC(N3CCN(C)CC3)CC2)ccc1Nc1ncc(C(C)=O)c(Nc2ccccc2P(C)(C)=O)n1
CC1=C(N2CC2)C(=O)c2c([nH]c(CO)c2C)C1=O
CCCCN1C(=O)/C(=N\Nc2ccccc2OC)c2ccccc21
Cc1ccc(CNc2nc(NCc3ccc(C)cc3)n(C(=O)c3ccccc3C)n2)cc1
CCc1ccc(Nc2nnc(SCC(=O)Nc3cccnc3Cl)s2)cc1
COc1cc2c(cc1OC)CN(CCc1ccc(NC(=O)c3cccc4c(=O)c5cccc(OC)c5[nH]c34)cc1)CC2
CSCC(=O)N1CCN(C)Cc2ccccc21
C[C@@H](c1ccc(S(N)(=O)=O)cc1)N(C)C(=O)/C=C/c1ccncc1
COc1ccc(C)cc1NC(=O)C1CCN(S(=O)(=O)Cc2ccccc2)CC1
CC(C)CCNC(=O)CCc1ncc(-c2ccc(F)cc2)o1
Cc1ccccc1-c1cc(N2CCNCC2)ncn1
NC(=O)c1ccccc1OCC(=O)NCCNCC(O)c1ccccc1
CCc1c2c(nc3ccc4c(c13)CC(O)O4)-c1cc3c(c(=O)n1C2)COC(=O)[C@]3(O)CC
COc1cccc(OCC2(C(=O)O)CCC2)c1
COc1ccc(Br)cc1CN(C)[C@@H](C)C(=O)Nc1cccc(C(C)=O)c1
N=c1oc2ccc(O)cc2cc1C(=O)Nc1cccc(O)c1
Fc1ccc(N2CCN(C(=S)c3cccc(Br)c3)CC2)cc1
CC(Cn1cccn1)NC(=O)NCCc1cccnc1
COc1cccc([C@H](C)NC(=O)CSc2nccnc2Sc2ccccc2)c1
C[C@H](NC(=O)CCC(=O)c1ccc2c(c1)OCCO2)c1ccc(S(N)(=O)=O)cc1
O=C(CSc1ncccn1)N[C@@H]1CCCN(C2Cc3ccccc3C2)C1
NS(=O)(=O)CCCC(=O)N[C@@H]1COC[C@H]1Cc1ccnc2ccccc12
COc1ccc(-c2cc(-c3ccc(C)cc3)nc(S[C@H](C)C(=O)Nc3ccc(C)cc3)c2C#N)cc1OC
COC(=O)[C@@H](C)[C@@H](O)[C@@H]1C[C@@]2(C)[C@@H]3CC[C@H]4Cc5c([nH]c6cc7c(cc56)C5=CC(C)(C)OC(C)(C)[C@H]5C7)[C@]4(C)[C@@]3(C)CC[C@]2(O)O1
Cc1cc(C)c(NS(=O)(=O)c2ccc3c(c2)CCN3)c(C)c1
COc1cccc(OC)c1C(=O)CC(CC(=O)c1ccc(F)cc1)c1cccc(C(=O)O)c1
CN(C)Cc1cc(/N=N/c2ccc(Cl)cc2)ccc1O
C[C@]1(c2cccc3ccccc23)NC(=O)N(CC(=O)N2CC[C@@H]3CCCC[C@H]3C2)C1=O
CCN(CC)C(=O)CNC(=O)c1ccc2cc(Oc3ccc(C(F)(F)F)cn3)ccc2n1
CNc1cc(C2CCN(C(=O)c3ccc4c(c3)C[C@H](C)O4)CC2)nc(CN(C)C(C)=O)n1
COc1ncc(-c2nc3c(n2C(C)C)C(c2ccc(Cl)cc2)N(c2cc(Cl)c(=O)n(C)c2)C3=O)c(OC)n1
CCCN(Cc1ccc(N)cc1)[C@H]1CCS(=O)(=O)C1
CNC(=O)c1ccc(CNC(=O)c2cnc(SC)nc2)o1
CCc1cc2c(N3CCN(c4nnc(C(F)(F)F)s4)CC3)ncnc2s1
N#Cc1ccc(NCC(F)F)nc1
CCN(CC)C(=O)COc1ccc2occ(-c3cc(OC)c(OC)c(OC)c3)c2c1
COc1ccc([N+](=O)[O-])cc1CSc1nc2ccc(NC(=O)c3ccccc3C(=O)N3C[C@H](C)O[C@@H](C)C3)cc2s1
C/C=C/c1ccc(OCCOc2ccc(C=O)cc2OC)c(OC)c1
CCC(NC)C(=O)N[C@@H]1C(=O)N(Cc2c(OC)ccc3cc(Br)ccc23)c2ccc(F)cc2OC12CCOCC2
CCCc1nc2ccc(Br)cc2c(=O)n1/N=C/c1cccc(OC)c1OCc1ccccc1
CCNC(=O)c1c(C)nc(CC)n1Cc1ccc2oc(-c3ccccc3NS(=O)(=O)C(F)(F)F)c(Br)c2c1
CC(=O)N1CCC[C@H]1C(=O)N1CC(C(=O)Nc2cc(F)ccc2N2CCCC2)C1
CC[C@@H](C(=O)N[C@H](C)CC)N(Cc1ccccc1C)C(=O)CN(c1ccc(Cl)c(C(F)(F)F)c1)S(=O)(=O)c1ccc(C)cc1
COC(=O)N(C)CC(=O)N1CCc2sccc2[C@H]1c1ccccc1
Clc1ccc(-c2nc(Cn3cc(-c4cccnc4)nn3)oc2-c2ccc(Cl)cc2)cc1
CNC(=O)CN(C)S(=O)(=O)c1cc(CCN2CCC(c3nc(COCC(F)(F)F)c(-c4ccccc4)o3)CC2)ccc1OC
CCCCCCCCCCCCCCCCCCNC(=O)OC[C@H]1C[C@H](COC(=O)N(Cc2cccc[n+]2CC)C(C)=O)S1
COC(=O)CSc1ncnc2c1nnn2-c1ccc(OC)cc1
COc1ccc([C@@H](C)NC(=O)c2cccc3cccnc23)cc1F
COc1cc(OC)cc(-c2c(C(=O)O)sc(SC(C)C)c2C#N)c1
CN1CCN(CC2(CNC(=O)c3cnc(-c4cccnc4)nc3)CC2)CC1
COc1cc2c(cc1OC)CN(S(=O)(=O)c1ccc(-n3cc(COc4ccc(C=O)cc4)nn3)cc1)CC2
Nc1ccccc1NC(=O)c1ccc(CNc2cccc(/N=N/c3ccccc3)c2)cc1
O=C(Nc1nn[nH]n1)c1cnc2sc3ccccc3n2c1=O
O=C(Nc1ccc(Cl)c(Cl)c1)c1ccc(Br)cc1
CCn1ccnc(N(C)CC(=O)Nc2c(C)cc(C)cc2C)c1=O
O=C(CCCC(=O)N1CCN(c2ccnc3cc(Cl)ccc23)CCN(c2ccnc3cc(Cl)ccc23)CC1)N1CCN(c2ccnc3cc(Cl)ccc23)CCN(c2ccnc3cc(Cl)ccc23)CC1
Cc1ccc(-c2nnc(-c3ccccc3C)o2)cc1
COc1ccc(-c2c(C=O)c3cc(OC)ccc3n2C)cc1
Nc1nccc(-c2cccc(OCc3c(F)cccc3Cl)c2)n1
C/C(CCc1ccco1)=N\NC(=O)CNc1cccc2ccccc12
O=C(O)C(=O)/C=C(\O)c1cccc(OCc2ccsc2C(=O)O)c1
O/N=C(\C=C\c1ccccn1)c1cc2ccccc2cc1O
CCN1C(=O)/C(=C/c2ccccc2OC(C)C)SC1=S
O=Cc1ccc(-c2ccc(Cl)cc2)o1
CC(=O)N1CCC(N(C(=O)COc2ccccc2C(=O)NC[C@H]2CCCO2)C2CC2)CC1
O=C(Nc1nc(-c2ccccc2)cn2cc(-c3ccccc3)nc12)c1cccs1
CC[C@]1(N)C[C@@H]1c1ccc(OC(F)(F)F)cc1
COc1ccc(C(=O)N/N=C/c2ccc(N3CCOCC3)o2)cc1OC
COCCn1ccnc1[C@H]1CCCN(C(=O)CN2CCCC2)C1
CSc1sc(C(=O)O)c(-c2ccc(Cl)cc2)c1C#N
COc1ccc2nccc(CC[C@H]3CC[C@H](NCc4ccc5c(c4)OCCO5)CC3)c2c1
C/C(=C\Cn1oc(=O)[nH]c1=O)c1cccc(OCc2coc(-c3ccc(C(F)(F)F)cc3)n2)c1
CC1COCCN1S(=O)(=O)c1ccc(S(N)(=O)=O)c(Cl)c1
CC(C)N(C)C(=O)c1cccc(C#N)c1
COc1ccc(C2C3CCc4ccccc4C3=NN2CCOC(=O)Nc2ccc(Cl)cc2)cc1
Cn1ncn2c(-c3ccc(F)c(-c4ccc(F)cc4C#N)c3)cnc2c1=O
O=C(Cc1cccc(F)c1)N[C@H]1CCCN(c2ccccn2)C1
Cc1cccc2nc(-c3ccc(-c4ccc(CN5CCN(CCC#N)CC5)cc4)cc3)[nH]c12
N#Cc1ccc(NC(=O)CSc2nc3ccc([N+](=O)[O-])cc3s2)cc1
Fc1ccccc1CNCCCSc1nnnn1-c1ccccc1
CC(=O)N1CCCc2cc([C@H](O)CN3CCN(c4ccccc4Cl)CC3)ccc21
Cc1ccc(S(=O)(=O)N2CCCCC2)cc1NC(=O)c1ccccn1
Cc1cc(N2CCOCC2)nc(CNC(=O)c2cccc3ccccc23)n1
COc1ccc(-c2cc(C(F)(F)F)c(C#N)c(SCC(=O)N3CCN(C)CC3)n2)cc1
Cc1ccc(F)c(NC(=O)Nc2ccc(-c3nsc4ncnc(N)c34)cc2)c1
CC(=O)N[C@@H](CC(=O)N1CCC[C@H]1c1ccc[nH]1)c1ccc(C)cc1
O=C(/C=C/c1ccc(Sc2ccccc2CN2CCOCC2)c(Cl)c1)N1CCOCC1
COc1ccc([C@H]2CCN(C(=O)CCc3nc(-c4nnc[nH]4)no3)C2)cc1
C/C(NCc1ccc(S(N)(=O)=O)cc1)=C1/C(=O)N(c2ccc([N+](=O)[O-])cc2)N=C1c1ccccc1
CCNC(=O)NC[C@@H](c1ccsc1)n1nc(C)cc1C
Cc1ccc(C)c(S(=O)(=O)N(C)CCc2noc(C3CCCCC3)n2)c1
O=C(O)CCCCCN1C(=O)C(O)=C(C(=O)c2ccc(F)cc2)[C@@H]1c1ccc2c(c1)OCO2
CCc1ccccc1-n1ncc(C(=O)Nc2ccc(OC)cc2)c1C
CC(C)(C)NC(=O)C1CC[C@@H]2[C@]1(C)CC[C@H]1[C@@]2(C)CC[C@H]2NC(=O)C=C[C@]12C
CCOc1ccc(NS(=O)(=O)c2ccc3c(c2)CN(C(=O)Nc2ccc(C(C)(C)C)cc2)C3)c(F)c1
CC1(c2ccccc2)CC(C)(C)N(C(=O)C2CCCO2)c2ccccc21
COc1ccc(N(C)C(=O)C[C@@H]2OCCc3ccsc32)cc1OC
COc1ccc2[nH]c3c(=O)n(/N=C/c4ccc(Cl)cc4)cnc3c2c1
COC(=O)c1cn(C2CCN(Cc3ccc([N+](=O)[O-])cc3)CC2)nn1
CC(C)NS(=O)(=O)c1ccc(Cl)c(C(=O)NCCc2cccc(Cl)c2)c1Cl
Cc1csc2nc(CSc3nnc(-c4ccc(Br)o4)n3Cc3ccccc3)cc(=O)n12
CCCCOc1ccc(CN2CCN(CC(=O)Nc3ccc4nsnc4c3)CC2)cc1
COc1cccc(/C=C/C(=O)OCC(=O)Nc2ccc3c(c2)OCO3)c1
CCOc1ccc(CN(C)C(=O)c2ccc(S(=O)(=O)N(C)c3ccccc3OC)cc2)cc1
O=C(Nc1ccc(SCC(=O)N2CCCc3ccccc32)nn1)c1cccs1
CCc1ccc2occ(C(=O)[C@@H](C#N)C(=O)Nc3ccccn3)c2c1
O=C(Nc1ccc(-n2cccn2)cc1C(F)(F)F)[C@@H]1CC=CCC1
O=C(CCSc1nnc(-c2ccncc2)o1)Nc1cccc2ccccc12
O=C1/C(=C/c2ccc([N+](=O)[O-])cc2)C(=O)N(c2ccccc2)C1c1ccccc1
c1ccc(-c2ccc(Nc3cncc4sc(-c5nnn[nH]5)cc34)cc2)cc1
O=C(C1CCOCC1)N1CCN(Cc2c(-c3ccc(Cl)cc3)nc3ccc(C4CC4)cn23)CC1
O=C(NCCCO)C(=O)Nc1ccc(Cl)c(C(F)(F)F)c1
COCCn1c(C)cc(/C=C2/C(=O)N(c3ccc(C)cc3)C(=O)N=C2O)c1C
CN1CCN2CCN(S(=O)(=O)c3cn(C)cn3)C[C@H]2C1=O
Cn1c(=O)oc2cc(S(=O)(=O)N3CCC[C@H](C(=O)N4CCCn5nc(-c6ccc(F)cc6)cc5C4)C3)ccc21
C#CC1(O)CCC2C3CCC4=C/C(=N/OCC(=O)NCC(=O)NC(C(=O)O)C(C)C)CC[C@]4(C)C3CC[C@@]21C
CC[C@@H](NS(=O)(=O)c1ccc2c(c1)CCN2C(=O)C1CC1)c1ccc(C)cc1
CN(C)C(=O)/C(=C/c1cn(-c2ccccc2)nc1-c1cccc([N+](=O)[O-])c1)NC(=O)c1ccccc1
Cc1cc(Cn2c([C@@H]3CCCC[C@@H]3C(=O)O)nc3ccc(OCc4ccn(C)n4)cc32)ccc1OC(F)(F)F
CC[C@H](C)c1nc([C@H](C)NC(=O)c2cccc(OCc3cscn3)c2)n[nH]1
Cc1cc(CN(O)C(N)=O)c(C)o1
CCOC1=N/C(=C/c2ccc(N(C)C)cc2)C(=O)S1
C[C@@H]1CN(c2ccccc2C#N)C(=O)CN1Cc1noc(C2CCCC2)n1
COc1ccc2c(c1)c(CC(=O)OCc1ccc(OC(=O)OCCC(C)(C)C)cc1)c(C)n2C(=O)c1ccc(Cl)cc1
CCOc1cc(=O)c(C(=O)N2CCC[C@@H](C)C2)nn1-c1cc(OC)cc(OC)c1
O=C(N[C@@H](Cc1cccnc1)C(=O)N1CCC[C@H]1C(=O)NCCc1ccccc1Cl)c1ccccc1
CN(C)Cc1ccc(C(=O)OCCOCn2cnc3c(=O)[nH]c(N)nc32)cc1
COc1cccc(C(=O)CCc2ccc(SC)cc2)c1
CN(CC(=O)NCCc1ccc(F)cc1)CC(=O)Nc1ccc(F)c(F)c1F
Cc1csc(CN[C@H]2CN3CCC2CC3)n1
Cc1ccc2nc([C@@H]3CCCN(C(=O)[C@@H]4CCS(=O)(=O)C4)C3)[nH]c2c1
Cc1ccc(S(=O)(=O)c2ncccc2CNCCO)cc1
CCOc1ccc(NC(=O)c2ccc(OC)c(CCCN(C)C)c2)cc1
COc1ccc(CN2C(=O)/C(=C/c3c(N4CCN(C)CC4)nc4c(C)cccn4c3=O)SC2=S)cc1
O=C(Nc1cccc(-n2cc(-c3ccncc3)c(-c3ccc(Cl)c(O)c3)n2)c1)Nc1ccc(Cl)c(C(F)(F)F)c1
Cc1cc(=O)c(-c2ccc3ccccc3c2)c(-c2ccc(S(C)(=O)=O)cc2)o1
COc1ccc(NS(=O)(=O)c2ccc3[nH]c4ccncc4c3c2)cc1
O=C(CN1C(=O)c2ccccc2C1=O)OCc1cn2ccccc2n1
NC[C@@H]1O[C@H](C2CCCCC2)Cc2c1ccc(O)c2O
CCCCCCCCCCCCCCCCCCOCCOP(=O)(O)CO[C@H](CO)Cn1ccc(N)nc1=O
C#CCOCCOCCOCCNc1nc(OC)nc(N2CCN(C(=O)[C@H](CCCCN)n3cc(C(N)CO)nn3)CC2)n1
COc1ccc(C)cc1N(CC(=O)N(Cc1ccc(Cl)cc1Cl)[C@@H](Cc1ccccc1)C(=O)NC1CCCC1)S(=O)(=O)c1ccc(C)cc1
CCCC(=O)Nc1nn(C)c2nc3cc(C)ccc3cc12
CC[C@H]1O[C@H]1C/C=C\C/C=C\C/C=C\C/C=C\CCCC(=O)O
CC#CCOc1ccc(S(=O)(=O)C2(C(=O)NO)CCN(Cc3ccc(Cl)c(Cl)c3)CC2)cc1
COc1ccnc(N2CCN(c3ncc(C(F)(F)F)cc3Cl)CC2)n1
NC(=O)c1ccc2oc(C(=O)C(Cc3ccccc3)NC(=O)Cn3c(-c4ccc(F)cc4)ncc(N)c3=O)nc2c1
CN1CC=C(CCc2ccc(Cl)c(Cl)c2)CC1
CCC(=O)NC(Nc1sc2c(c1C(=O)OC)CCCC2)(C(F)(F)F)C(F)(F)F
O=C1[C@H]2[C@@H](C(=O)N1c1ccccc1Br)[C@H](c1ccc(Br)cc1)OC21C(=O)c2ccccc2C1=O
COC1=C(OC)C(=O)C(CCCCCCCCCCO)=C(C)C1=O
O=C(/C=C\c1cccc(Cl)c1Cl)c1ccc(S(=O)(=O)N2CCCCCC2)cc1
CN1CCN(C(=O)[C@@H](COCc2ccccc2)NC(=O)c2cccnc2Oc2cccc(N(C)C)c2)CC1
COc1ccc(S(=O)(=O)N(c2ccccc2)[C@H]2CS(=O)(=O)C[C@H]2O)cc1NC(C)=O
O=C(Nc1cc(Cl)nc(Cl)c1)O[C@H](Cn1ccnc1)c1ccc(Cl)cc1
O=C(CN1C(=O)[C@@H]2[C@@H]3C=C[C@H]([C@H]4C[C@@H]43)[C@H]2C1=O)Nc1ccc([N+](=O)[O-])cc1
O=C(CSc1nnc(-c2ccccn2)c(-c2ccccn2)n1)c1ccc(-c2ccccc2)cc1
COC(=O)[C@H](Cc1ccccc1)NCCCn1cnc(C(=O)Nc2ccc(C)c(C)c2)n1
Cc1cccc(NC(=O)N2CCN(c3ccc(NC(=O)CN(Cc4ccc(F)cc4)C(=O)C4CCC4)cc3)CC2)c1
CCCCCCCCCCCCCCCCNCCCNCCCNCCCNCCCN
C[C@H]1[C@H]2C[C@@H](C/C2=N\O)C1(C)C
COc1ccc2c(c1)C(=O)c1ccc(Nc3ccc(F)cc3F)cc1CC2
CC(C)CCNC(=O)[C@H](C1CCCC1)N1CCN(C(=O)c2ccccc2)CC1
CCOC(=O)N1CCN(CC2=Cc3c(Cl)ccc(OC)c3CC2)CC1
COc1cc2nc(N3CCNCC3)cc(N)c2cc1OC
CN(Cc1ccccc1)C(=O)[C@H](Cc1cccc2ccccc12)NC(=O)[C@@H]1CCCN1/C(S)=N/Cc1ccccc1Cl
CCOc1cc(/C=C2/C(=O)N(c3cccc([N+](=O)[O-])c3)C(=O)N=C2O)cc(Br)c1O
COc1ccc([C@@H](CNC(=O)CCNc2ccccc2[N+](=O)[O-])N2CCOCC2)cc1
C=C(c1cc(OC)c(OC)c(OC)c1)n1ccc2cc(OC)ccc21
COc1cc(-c2coc3cc(O)cc(O)c3c2=O)cc(O[C@@H]2O[C@H](CO)[C@@H](O)[C@H](O)[C@H]2O)c1OC
CCCOc1ncccc1N
NC(=O)NC(=O)CN1C[C@H](c2ccccc2)O[C@H](c2ccc(F)cc2)C1
Cc1ccc(CC(=O)N2CCC[C@H]2c2nnc(C(=O)Nc3ccc4c(c3)OCO4)s2)cc1
Cc1ccnc(-c2n[nH]c([C@H](C)/N=C(/O)[C@H](C)C3CCOCC3)n2)c1
COCCCn1c(=N)c(C(=O)NCCc2ccc(OC)c(OC)c2)cc2c(=O)n3cccc(C)c3nc21
Cc1cc(=S)c(O)c(C(=O)NCc2ccc(-c3ccccc3)cc2)o1
O=C(c1ccc(C2=NCCCN2)cc1)N1CCN(S(=O)(=O)c2ccc3cc(Br)ccc3c2)CC1
O=S1(N2CC2)=NP(N2CC2)(N2CC2)=NP(N2CC2)(N2CC2)=N1
C=C/C=C/C1(C)SC(=O)C(C)=C1O
Cc1c(CC(=O)N2CCC3(CC2)OCCO3)c(=O)oc2c(O)c(O)ccc12
COc1ccccc1OCCNC(=O)c1ccc([C@@H]2SCC(=O)N2Cc2ccc(Cl)cc2)cc1
CN(C)CCCN1CCC2(CCSCC2)C1
COc1cc(C(=O)NC[C@@H]2CCN(Cc3nccn3C)C2)ccn1
CC(C)C[C@@H]1NC(=O)[C@@H](NC(=O)[C@H](Cc2ccccc2)NC(=O)[C@H](C)N)CCCCNC(=O)C[C@@H](C(N)=O)NC(=O)[C@H](CCCN=C(N)N)NC1=O
Cc1nc(OC(F)F)ccc1Nc1nc(Cl)cn([C@H](C)C2CC2)c1=O
Cc1oc(-c2ccc(NC(=O)c3cccc(C(F)(F)F)c3)cc2)nc1Cn1cccn1
C[C@@H]1[C@@H](NC(=O)C2CCN(C(=O)C(C)(C)C)CC2)CCC[C@H]1C
CC(C)CN1CCN(c2nc(C(=O)O)co2)[C@H](C)C1=O
Cc1ccc(N2CC[C@H](NC(=O)c3cccc(Br)c3)C2=O)cc1
COc1ccc(S(=O)(=O)NC(=O)c2ccc(Cl)cc2Cl)cc1OC
COc1cc(C(=O)c2ccc3c(ccc[n+]3C)c2)cc(OC)c1OC
Cc1c(CC(=O)O)c2ccc(Cl)nc2n1Cc1ccc(S(C)(=O)=O)cc1C(F)(F)F
Cc1ccc(CN2C3=NCCCN3c3ccccc32)cc1
OCCN1CCNCC1
COc1ccc(CN2CCC[C@@H](c3nnc4n3CCCCC4)C2)cc1Cl
Cc1ccc2[nH]c([C@H]3CCCN(Cc4cc(=O)n5ccsc5n4)C3)nc2c1
C[C@@H](OC(=O)c1nn([C@H](C)C(=O)c2ccc(Cl)cc2)c2ccccc12)C(=O)c1ccc(Cl)cc1
O=S1(=O)c2ccc(Br)cc2N2CCC[C@@H]2CN1Cc1ccc(Cl)cc1
CCn1cc(C(=O)O)c(=O)c2c(N)c(F)c(N3CC(C)NC(C)C3)c(F)c21
O=C(CCCc1cn[nH]c1)N[C@@H]1COC[C@H]1Cc1ccncc1
CCN1C(=O)N(C)[C@@H](c2ccccc2)C(C(C)=O)=C1C
COc1ccc(CCNC(=O)[C@@H]2COCC(=O)N2Cc2ccc(F)cc2)c(OC)c1
c1ccc2c(c1)oc1c(SCc3nc(-c4ccsc4)no3)ncnc12
CCOc1cc(/C=C2/N=C(c3cccs3)OC2=O)ccc1OCCCOc1ccc(OC)cc1
CCNC(=O)[C@@H]1C[C@H](NC(=O)c2cccs2)CN1Cc1nccs1
O=C(N=C1N=C2C=CC(Br)=CN2Cc2ccccc21)c1cccc(Br)c1
CCOP(=O)(CCCN(O)C(=O)CCCc1ccccc1)OCC
CNS(=O)(=O)c1cccc(-c2ccc3c(c2)CCCN3C(=O)c2c(F)cccc2Cl)c1
Cc1cccc(C)c1NC(=O)[C@H](C)NS(=O)(=O)c1ccc(F)cc1
Cc1nn(C)c(=O)c(C(=O)N[C@H](C)c2c(C)nn(C)c2C)c1C
CCCCCCNC(=O)Oc1cccc(CN(C)CCCOc2ccc3c(=O)ccoc3c2)c1
CN(C)c1cccc2c(S(=O)(=O)NC(CCCN=C(N)N)C(=O)N(CC(=O)O)CC3CCCO3)cccc12
Cc1ccc(C)c(N([C@@H](C)C(=O)N2CCN(C=O)CC2)S(C)(=O)=O)c1
C[C@H](NC(=O)C[C@@H](C)N1CCCCC1=O)c1ccc(Cl)cc1
CCNC(=O)N1CCN(c2nc3ccccc3c3nnc(-c4ccc(Cl)cc4)n23)C[C@H]1C
CCOC(=O)CCC(NC(=O)C1C(c2ccc(Cl)nc2)C2CCC1N2Cc1ccccc1)C(=O)OCC
Cc1ccccc1OCCN(C)C(=O)[C@H]1CCNC1
Cc1ccc(C(=O)Nc2ccc3oc(-c4cccc5c(Br)cccc45)nc3c2)c(C)c1
COc1ccc(-n2cc(-c3ccccc3)c3c(Nc4ccc(OC)c(OC)c4)ncnc32)cc1
CCCC[C@H](CC)CNc1nc2c(c(=O)n(C)c(=O)n2C)n1C[C@@H](O)COc1ccc(OC)cc1
COc1ccc(C(=O)CN2C(=O)C(c3cc(OC)c(OC)c(OC)c3)=C(c3cc(OC)c(OC)c(OC)c3)C2=O)cc1OC
Cc1cn(-c2cc(C)c3c(c2)CCC(=O)N3)c(C)n1
CN(Cc1cc(-c2ccccc2)n[nH]1)C(=O)CCc1cc2n(n1)CCNC2
CC(C)c1ccc(OCC(=O)NC(C)(C)Cc2ccccc2)c(Br)c1
CCc1n[nH]c(SCC(=O)Nc2c(C)n(C)n(-c3ccccc3)c2=O)n1
Cc1nn(C)c(C)c1NS(=O)(=O)c1ccc(NCCCO)nc1
O=C(O)CCCNC(=O)N1CCc2c([nH]c3ccc(Cl)cc23)C1
Cc1ccc2c(n1)OCCN2C(=O)[C@H](NC(=O)c1ccco1)C(C)C
CCc1nc2cc(NC(=O)C[C@@H]3NC(=O)c4ccccc43)ccc2n1CC
COC(=O)c1cc(-c2ccccc2)nn1Cc1ccc(Cl)cc1
CCc1cccc(NC(=S)Nc2cccc(C(C)C)c2)c1
COc1cccc(/C=C2\CN(C)C/C(=C\c3cccc(OC)c3)C2=O)c1
CCOc1ccc(NC(=O)C[C@@H]2C(=O)N[C@H]3CCCC[C@H]3N2C(=O)Nc2cccc(Cl)c2)cc1
Cn1nc(C(C)(C)C)cc1NC(=O)C(=O)c1ccc(OCCN2CCOCC2)c2ccccc12
Cc1oc(NC(=O)CN(C)CC(=O)NC(C)(C)C)c(C#N)c1C
O=C(O)C1C2C=CC(C2)C1C(=O)N1CCN(CCO)CC1
CCOC(=O)c1cccc(NC(=O)N2CCN(C[C@H](OCc3c(F)cccc3F)c3ccc(Cl)cc3)CC2)c1
COc1ccc(-c2noc(-c3ccc(-c4onc(-c5ccc(OC)cc5)c4S(=O)(=O)c4ccccc4)cc3)c2S(=O)(=O)c2ccccc2)cc1
CN1C(=O)C(O)=C(C(=O)c2ccccc2)C1c1ccccc1
COC(=O)C(Cc1ccccc1)OC(=O)C(N)CC(=O)O
C#CCOc1ccc([C@@H]2CC(=O)Nc3c2sc(C(=O)O)c3-c2ccccc2)cc1
CC(C)Oc1ccccc1CNC(=O)c1cc(C(F)(F)F)nn1-c1ccc(CNC(=O)[C@H](C)N)s1
Cc1csc(N2CCN(C[C@H](O)COC[C@H]3CCCO3)CC2)n1
CC(C)C[C@H](NC(=O)c1[nH]cnc1C(=O)N(C)Cc1ccccc1)C(=O)OC(C)(C)C
O=C(c1ccc2cccc([N+](=O)[O-])c2n1)N1CCCC1
CC(C)(C)NCc1cc(Nc2ccnc3cc(Cl)ccc23)ccc1O
CS(=O)(=O)c1ccc(-n2nc(C(N)=O)c3c2-c2cc(NC(=O)c4cc5c(cc4Cl)OCO5)ccc2CC3)cc1
CC(C)(C)CN1CCN(Cc2cccc3c2OCO3)C[C@@H]1CCO
COC(=O)[C@]1(C)CCC[C@]2(C)c3cc(Br)c4nc(/N=C/c5cc(Cl)cc(Cl)c5O)[nH]c4c3CC[C@H]21
CCC(Sc1nc(C)cc(O)n1)C(=O)Nc1sc2c(c1C#N)CCCC2
CCc1ccc(N2C[C@H](C(=O)Nc3ccc(S(=O)(=O)N4CCCC4)cc3)CC2=O)cc1
CCC(=O)Nc1ccccc1C(=O)NCC(C)C
NC(=O)[C@@H](c1ccccc1)n1nnc(-c2cccc(C(F)(F)F)c2)n1
Fc1ccc2sc3c(c2c1)CCN(Cc1cnccc1Br)C3
C[C@@H](NC(=O)/C=C/c1ccccc1)c1nc(-c2ccc(Cl)cc2)no1
CCOc1cc(C=Nn2c(C(C)C)nc3ccccc3c2=O)ccc1OC(=O)c1ccc(Br)cc1
C=CCc1ccccc1OCCOc1ccccc1/C=C1\C(=N)N2N=C(C(F)(F)F)SC2=NC1=O
C=CCOC(=O)C1=C(C)N=C(S)NC1/C=C/c1ccccc1
COc1cc(NC(=O)CN2CCO[C@@H]3CCCC[C@@H]32)cc(OC)c1
CC[C@@H](C)NC(=O)Cc1csc(SCC(=O)c2ccc(OC)cc2)n1
COc1cc([C@H]2Cc3ccccc3-c3nc(N)c4ccccc4c32)cc(OC)c1OC
CCOc1ccc(Cl)c(C(=O)N(C)C)n1
Cc1cc(Br)ccc1NC(=O)CSc1nnc(CNC(=O)/C=C/c2ccccc2Cl)n1C
CCOC(=O)C1=C(C)NC2=C(C(=O)C[C@@H](c3ccc(Cl)cc3)C2)[C@@H]1c1ccccc1Cl
COc1ccc([C@@H]2OC(=O)N(Cc3ccc(OC)c(OC)c3)[C@]2(O)c2ccc(OC)cc2)cc1
O=C(CCc1ncc(-c2ccccc2Cl)o1)Nc1ccc(-n2cnnn2)cc1
O=C(N[C@@H](Cc1ccccc1)C(=O)Nc1ccc(-c2ccccc2)cc1)c1ccccc1
Cc1cc(C)c(CNC(=O)[C@@H]2CC(=O)N(c3cccc(NC(=O)C4CCC4)c3)C2)c(C)c1
Cc1cc(NC(=O)[C@@H]2CC(=O)OC23CCCC3)ccc1N1CCCC1=O
CC(=O)Nc1ccc(/C=C2\SC(=S)N(/C=C(/c3ccccc3)[S@@](=O)Cc3ccccc3)C2=O)cc1
CN(Cc1ccccc1)C(=O)CN1C(=O)c2ccccc2C1=O
Cc1cccnc1-n1cc(C2=CCN(CC(=O)Nc3cnccn3)CC2)cn1
Cc1ccc(-c2cc(C(=O)Nc3ccc(S(=O)(=O)N(C)C)cc3)c3ccccc3n2)cc1C
Cc1ccc(CN2CCOC[C@]3(C[C@H](CNc4ncccn4)CO3)C2)s1
COc1cc(/C=N/Nc2nc(=Nc3cc(C)ccc3C)nc(N3CCOCC3)[nH]2)cc(Br)c1OCc1ccc(F)cc1
CC(C)CN(C(=O)COC(=O)CNC(=O)c1ccccc1)c1c(N)n(Cc2ccccc2)c(=O)[nH]c1=O
CCOC(=O)C[C@H]1c2cc(OC)c(OC)cc2CCN1CC(=O)Nc1ccccc1C(F)(F)F
O=C(NCCc1ccccc1)[C@H](C(=O)c1cccc([N+](=O)[O-])c1)n1ccccc1=O
COc1ccc(CNc2nc(SCC(=O)NCc3ccco3)nc3ccccc23)cc1
COP(=O)(O)C(=O)Oc1ccccc1
O=C(O)COc1cccc(C[C@@H]2CCC[C@H]3O[C@]23c2nc(-c3ccccc3)c(-c3ccccc3)o2)c1
CCCCCC(=O)N1C[C@H](O)[C@@H](n2cc(COC(=O)c3ccccc3)nn2)C[C@@H]1c1ccc(OC)cc1
Cc1nc(C)n(CC(O)COc2ccc3cc(Br)ccc3c2)n1
COc1ccc(-c2c(C)c3cc(O)ccc3n2Cc2ccc(OCCN3CCCCC3)cc2)cc1
CCCCCCCCCCN1C(=O)NC(c2ccccc2)(c2ccccc2)C1=O
Cc1noc([C@@H](C)NC(=O)C2=NN(c3ccccc3)[C@H](c3ccccc3)C2)n1
CN(C)c1ncnc2c1CN(c1c(C#N)c(=O)n(C)c(=O)n1C)CC2
COC(=O)c1cccc(-n2c(C)cc(/C=C3/C(=O)N(c4ccccc4)N=C3C)c2C)c1C
Nc1ccccc1C(=O)N/N=C/c1ccc2c(c1)OCO2
CC1(C)OC(=O)C(=CNc2ccc3c(c2)OCCO3)C(=O)O1
C=CCn1c(COc2ccc(NC(=S)Nc3ccccc3)cc2)n[nH]c1=S
CC1CCCCN1CCNC(=O)NCc1ccc(C#N)cc1F
C[C@H]1CN(CC2CCOCC2)C[C@@]12CCN(Cc1cccnc1)C2=O
C[C@@H]1CCC[C@H](NC(=O)[C@H]2CCCN(C(=O)c3ccoc3)C2)[C@@H]1C
NS(=O)(=O)c1cccc(NC(=O)CN2CCCc3ccccc32)c1
Cc1ccccc1CS(=O)(=O)c1snnc1C
Cc1ccc(C(=O)N2CCc3ccccc3C2)c(C2CCN(Cc3cccs3)CC2)n1
C[C@@H](C(=O)Nc1ncc(Br)cc1Br)c1ccccc1
COc1c(C)cnc(CN(C)C(=O)c2ccc(=O)n(C)n2)c1C
CCOc1ccc(C(=O)Nc2nonc2-c2ccc(F)cc2)cc1
COc1ccc(-c2csc(NC(=O)COC(=O)COc3ccccc3)n2)cc1
COc1cc(CCNc2nc(NCc3ccccc3-c3ccccc3)nc(N3CCC(N)CC3)n2)ccc1O
Cc1cccc(N(C(=O)C[S+]([O-])CC(=O)Nc2ccc3c(c2)OCO3)C(C)C(=O)NC2CCCC2)c1C
COC(=O)c1cc(Br)n(C)n1
COc1cc(NC(=O)[C@H]2CN(S(C)(=O)=O)c3cc(Cl)ccc3O2)c(OC)cc1Cl
CCCCCC[n+]1cc2ccccc2c2ccccc21
Cc1cc([C@H](N)CC(=O)O)ccc1O
CCCCn1nc(C)c(C(=O)Nc2ccc(N3CCCCCC3)cc2)c1Cl
C[C@@H](NC(=O)CC1CCCCC1)C(=O)NCC(C)(C)N(C)C
C1CCc2nnc([C@H]3CCCN(c4nc(CN5CCOCC5)nc5sc6c(c45)CCC6)C3)n2CC1
C=CCC[C@H](O)CN(CCOC)CC(=O)N1CCc2sccc2[C@H]1COc1ccc(F)cc1
CCN(CC)CCOC(=O)c1ccc(-n2c(=S)[nH]c3ccccc3c2=O)cc1
CC(C)(C)OC(=O)N[C@H](Cc1ccccc1C(F)(F)F)C(=O)NCc1nc2cccnc2[nH]1
CN(C/C=C/c1ccc(-c2ccccc2)cc1)Cc1cccc2cc[nH]c12
CC[C@H](C)[C@H](NC(=O)[C@H](Cc1ccc(O)cc1)NC(=O)[C@@H]1CCCN1C(=O)[C@H](CCCNC(=N)N)NC(=O)[C@@H](N)CC(=O)O)C(=O)N[C@@H](CC(C)C)C(=O)O
CC[C@@H](c1ccccc1)N1Cc2cc3c(cc2C[C@H]1C(=O)N[C@@H](Cc1ccc(Oc2ccnc(C)c2)cc1)C(=O)O)OC[C@H](c1ccc(OCc2ccc(Cl)c(Cl)c2)cc1)O3
Cc1ccc(-c2csc3c(=O)[nH]c(N4CCC[C@@H](C(=O)NCc5cccs5)C4)nc23)cc1
CCOc1ccc(S(=O)(=O)N[C@@H](C)Cn2cncn2)cc1C
COc1cc(C2C3=C(CC(C)(C)CC3=O)N(CCc3ccccc3)C3=C2C(=O)CC(C)(C)C3)ccc1OCc1cccc2ccccc12
COc1ccc(-c2nc3ccc(Cl)cn3c2Cc2ccc(C)cc2)cc1OC
O=c1c2ccc(Cl)cc2[nH]c(=S)n1CCCN1CCOCC1
CCNC(=O)[C@@H](Cc1ccccc1)N(Cc1ccc(F)cc1)C(=O)CCc1ccc(C(C)(C)C)cc1
C[C@H]1CCC[C@@H](C)N1C(=O)COc1ccc(C(=O)NC[C@@H]2COc3ccccc3O2)cc1
COc1ccccc1Sc1ccc2c(c1)N1CCNCC1C2
O=S1(=O)C[C@@H](O)[C@@H](Nc2ccc(NS(=O)(=O)c3ccccc3)cc2)C1
CSc1ccc(N/N=C(/C#N)S(=O)(=O)C(C)(C)C)cc1
Cc1nc2ccccc2c(=O)n1NC(=O)c1ccc(CS)cc1
O=C(Nc1ccc(Cl)cc1)c1cc(Cl)ccc1NC(=O)c1sc2ccccc2c1Cl
NC[C@@H]1Cc2cccc(-c3cncc(C(=O)N4CCOCC4)n3)c2O1
C[C@]12CCC3[C@@H](CCC4=CC(=O)CC[C@@]43C)C1Cc1cn[nH]c1N2
O=C(NC(=S)NCc1cccnc1)c1cc(Br)ccc1Cl
O=Cc1c(-c2ccc(F)cc2)nc2ccccn12
CC(C)[C@H](N)C(=O)N1CCC[C@@H]1CN(C)C(C)C
COc1ccc(Br)cc1CNCC1CCCO1
COc1ccc([C@@H]2CC(c3ccccc3O)=NN2C(=O)c2ccco2)cc1OC
O=C(CCc1ccccc1)Nc1cccc(NC(=O)c2ccncc2)c1
Cc1cccc(C(=O)N2CCCCC[C@@H]2c2nc(-c3ccncc3)no2)c1
CC(=O)Oc1ccc2c(C)c(CC(=O)NCCc3ccsc3)c(=O)oc2c1C
N#C/C(=C\c1ccc(-c2ccc(Cl)c(C(=O)O)c2)o1)C(=O)NCc1ccco1
BrCC[n+]1ccc(-c2cc[n+](CCBr)cc2)cc1
COC1CCC2(CC1)Cc1ccc(-c3cncc(F)c3)cc1C21N=C(N)N(C)C1=O
CC[C@H](C)NC(=O)CCNC(=O)N1CCC[C@@H]1C(=O)Nc1ccccc1
COc1cccc(/C=C/n2ncc(Cl)c(Cl)c2=O)c1
Cc1cc([N+](=O)[O-])nn1CC(=O)NN=C(S)Nc1ccc(F)cc1
CC(C)C1CCSC1=O
Cc1ccc(/C=C2\C[C@H]3[C@@H]4CC[C@@H]5CCCC[C@]5(C)[C@H]4CC[C@]3(C)[C@@H]2O)cc1
CC(/C=N/n1c(S)nnc1-c1ccccc1)=C\c1ccco1
C#CCO[C@@H]1C[C@H](n2cnc3c(O)nc(NC(=O)C(C)C)nc32)O[C@@H]1CO
Nc1nccc2c1nnn2Cc1ccccc1
O=c1[nH]c(=O)c2sc3nc4c(c(C(F)F)c3c2[nH]1)CCCC4
CSC(=S)N1CCN(C(=S)SC(=S)N(C)C)CC1
CC1=NN(c2ccccc2)C(=O)/C1=C\c1cn([C@H]2C[C@H](O)[C@@H](CO)O2)c(=O)[nH]c1=O
O=C1NC(=O)C(=CN2CCc3ccccc32)C(=O)N1
CCc1c(Sc2cc(C)cc(C)c2)n(OCCCO)c(=O)[nH]c1=O
Cc1nc(C[C@H]2CCCN(C(=O)CC3OCCCO3)C2)no1
Cn1cc(CCC(=O)NCCCc2nc3ccccc3[nH]2)c2ccccc21
Nc1ccc(-c2c3ccc(=O)cc-3oc3cc(O)ccc23)c(C(=O)O)c1
O=C(C(=O)N1CCN(C(=O)c2ccco2)CC1)c1cc2ccccc2o1
O=C(NCc1ccc2c(c1)OCO2)c1cccc(N2CCCN(Cc3cccc(F)c3)C2=O)c1
Cc1ccc(S(=O)(=O)O[C@@H]2CC[C@@]3(O)[C@H]4Cc5ccc(O)c6c5[C@@]3(CCN4CC3CC3)[C@H]2O6)cc1
Cc1cc(Br)cc2c(C(=O)NC[C@H]3CCCO3)cc(-c3ccccc3)nc12
Cc1cc(C(=O)CCC(=O)N[C@H](C)[C@@H](O)Cc2ccccc2)c(C)s1
Cc1ccc(-c2nn(-c3ccccc3)cc2C(=O)O)cc1C
C/C(=C\c1ccc(O)c(O)c1)c1ccc(O)cc1
CC(C)N1CCC(CC(=O)N2CCc3c([nH]n(CCO)c3=O)C2)CC1
CC[C@@H](C)[C@H](S)C(=O)N[C@@H](Cc1ccc(OCc2ccc(F)cc2)cc1)C(=O)O
CN1CCC[C@H]1[C@H]1CCCN1C(=O)CCc1ccc(F)cc1
NC(=O)c1noc(CNC(=O)N2CCC(c3nnc4ccccn34)CC2)n1
O=c1c2ccccc2n(CCCN(CCO)CCO)c2ccc(Cl)cc12
Nc1ccc(S(=O)(=O)NCc2cn(Cc3cccc(Cl)c3)nn2)cc1
Cc1cccc(NC(=O)CN2CCN(c3ccc4nnnn4n3)CC2)c1C
CC[C@H](C)/C=C(C)/C=C/C1=CC2=C(Cl)C(=O)[C@](C)(O)[C@@H](O)[C@H]2CO1
CCCN(c1ccccc1)S(=O)(=O)c1ccc(C(=O)Nc2ccc(Cl)cc2C(=O)O)cc1
C[C@H]1Cc2ccccc2N1Cc1nc2scc(-c3cccs3)c2c(=O)[nH]1
C#CCNc1ccnc2sc3c(=O)n(-c4ccc(OC)c(F)c4)cnc3c12
Cc1nc(C)c(C(=O)NC[C@H]2Cn3cccc3C(=O)N2C)s1
CC[C@H](C)N=c1[nH]c(-c2ccccc2)cc(=Nc2c(Cl)cccc2C(F)(F)F)[nH]1
C=CCN1CCN(c2cc3c(cc2F)c(=O)c(C(=O)O)cn3C2CC2)CC1
CC[C@H](C)CN(C[C@@H](O)[C@H](Cc1ccccc1)NC(=O)O[C@H](C)CC(=O)OC)S(=O)(=O)c1ccc(OC)cc1
CC1CCc2c(sc3nc(CN4CCN(S(=O)(=O)c5ccccc5[N+](=O)[O-])CC4)nc(O)c23)C1
CC[C@@]1(O)C(=O)OCc2c1cc1n(c2=O)Cc2c-1nc1ccccc1c2/C=N/OCc1ccc(C)cc1
COc1cc(C(=O)c2c(C#Cc3ccccc3)sc(C)c2C)cc(OC)c1OC
COc1ccc(Nc2nccc(-c3sc(SCc4cccnc4)nc3C)n2)c(OC)c1
CCCc1ccc(Cc2csc([C@@H]3O[C@H](CO)[C@@H](O)[C@H](O)[C@H]3O)n2)cc1
O=C(C(=O)c1ccccn1)c1cccc(NC(=O)c2ccc(Cl)cc2Cl)c1
Clc1ccccc1-c1nc2c([nH]1)c1c(c3ccccc32)CCC=C1
CCC(OC(=O)[C@H]1CC[C@H](CN)CC1)OC(=O)[C@H]1CC[C@](C)(CN)CC1
CC(C)[C@H](NCc1ccc(-c2ccccc2)o1)C(=O)O
Cc1cc(C)c(NC(=O)CCn2cnc3sc4c(c3c2=O)CCCC4)c(C)c1
CC(=O)N1CCC(C(=O)NC[C@@H]2CCCOC2)(c2ccccc2)CC1
C[C@H](CC(=O)N1CCC(O)(Cn2cnc3c(-c4ccccc4N)n(C)nc3c2=O)CC1)c1ccccc1
Cc1ccc(-c2n[nH]c(S[C@H](C)C(=O)N3CCC(C)CC3)n2)cc1
COc1cc(OC)cc(C(=O)NCc2nnc(SCC(=O)Nc3cccc(C)c3)n2-c2ccc(F)cc2)c1
Cc1c(C(=O)NCc2ccccc2CN2CCCC2)oc2ccc(F)cc12
Cc1c(-c2noc(-c3cccc(N(C)C)c3)n2)nnn1Cc1ccc(F)cc1
CCOCCC(=O)OCC[C@H](C)OC
CC[C@@H](C)n1nccc1NC(=O)[C@@H](C)Sc1cc(C#N)ccn1
N[C@@H](Cc1cc(Br)c(Oc2ccc(O)c(Cc3ccc(O)nc3)c2)c(Br)c1)C(=O)O
CCOc1ccc(CCNC(=O)c2cc3c(s2)-c2c(C)cccc2OC3)cc1
Cn1cc(C(=O)Nc2ccc3c(c2)CCC3)c2ccccc21
COCCN1CC2(CCC1=O)CCN(C(=O)c1ccc3occc3c1)CC2
CC(=O)C1CCCN(CCOC(c2ccc(Cl)cc2)c2ccc(Cl)cc2)C1
c1ccc(Nc2nnc(-c3ccc4[nH]cc(-c5cncc(C6CC6)n5)c4c3)o2)cc1
CN1CCC(C)(C)c2cc3c(-c4ccc(C(=O)N5CCCCC5)s4)c4ccc(=[N+](C)C)cc-4sc3cc21
O/N=C/c1cc[n+](COC[n+]2ccc(/C=N/O)c(F)c2)cc1F
CCn1cc(-c2ccnc3[nH]c(-c4cccc(CN(C)C)c4)cc23)c(-c2ccc(NC(=O)N(C)C)cc2)n1
CC(C)(C)c1cc(C(=S)N2CCCCC2)cc(C(C)(C)C)c1O
Clc1ccc(C(Cc2ccccc2)Cn2ccnc2)c(Cl)c1
CSCCC(N/C=C1\C(=O)NC(=O)N(c2ccc(Cl)cc2)C1=O)C(=O)OC(C)(C)C
CC1CCN(C(=O)CC(F)(F)F)CC1N(C)c1ncnc2[nH]ccc12
Clc1ccc(OCCC2CCN(CCCCCCCN3CCC(CCOc4ccc(Cl)c(Cl)c4)CC3)CC2)cc1Cl
Cc1ccccc1CNC(=O)[C@@H]1c2ccccc2CC(=O)N1C(C)C
O=C(NC1CCCC1)[C@@H](Cc1ccccc1)N(Cc1ccccc1Cl)C(=O)CN(c1ccc(Br)cc1)S(=O)(=O)c1ccccc1
COc1ccc(/C=C/CO)cc1OCC(O)CNC(C)C
CCCNC(=O)[C@@H](CC)N(CCc1ccccc1)C(=O)CN(c1ccc2c(c1)OCCO2)S(=O)(=O)c1ccccc1
COc1cc(C2=N/C(=C\Nc3ccc(C(C)=O)cc3)C(=O)O2)cc(OC)c1OC
Cc1nc(N)c2sc3ncccc3c2n1
Cc1c(-c2ccccc2S(C)(=O)=O)nc2cc(F)ccc2c1N1CC2(CCOCC2)c2ccc(N3CCOCC3)cc21
COc1ccc2c(c1)c(/C=C/C(=O)c1ccc(OC)c3c1OC(C)(C)C=C3)cn2C
CCc1ccc(NC(=O)CSc2nc(O)cc(=O)n2C2CCCC2)cc1
CCN(CC)CCNc1cc2c(=O)n(CCN(CC)CC)c(=O)c3c(NCCN(CC)CC)cc4c(=O)n(CCN(CC)CC)c(=O)c1c4c23
Cn1cc(C(=O)N[C@@H]2CCC(=O)N[C@H]2C2CC2)c(-c2ccccc2Cl)n1
COc1cccc(C(=O)Nc2ccc(OCCNCCO)c(-c3ccnn3C)c2)c1
CC(C)(C)C(=O)NCCCC(=O)N1CCN(S(=O)(=O)c2cccs2)CC1
COc1cc2oc(=O)cc(-c3ccc(-c4ccc(N(C)C)cc4)cc3)c2c(OC)c1OC
Cc1nn(-c2ccc(Cl)cc2)c(C)c1CC(=O)NCCC(C)C
C(CCCCNC1=NCCN1)CCCNC1=NCCN1
Cc1cccc(C)c1NC(=O)CSc1[nH]cnc2nncc1-2
OCCCNc1nc(O)c2c(n1)-c1ccccc1CC21CCCCC1
CC(=O)[C@@H]1CC[C@H]2[C@@H]3CC[C@H]4C[C@@H](O)CC[C@@]4(C)[C@H]3CC[C@]21C
COc1ccc2c(c1)oc(=O)c1c(C)nn(-c3ccc(C(F)(F)F)cc3)c12
CCCCCN(C[C@@H](O)[C@H](Cc1ccccc1)NC(=O)O[C@H](C)CC(=O)OC)S(=O)(=O)c1ccc(OC)cc1
CCn1nccc1C(=O)/C=C/c1ccc(-c2cccc([N+](=O)[O-])c2)o1
COc1ccc(-c2cc(C(F)(F)F)n3nc(C(=O)NCCN4CCOCC4)c(Cl)c3n2)cc1OC
CC(C)(NC(=O)c1cn(-c2ccc(Cl)cc2Cl)c(-c2ccc(Cl)cc2)n1)c1noc(C(F)(F)F)n1
CNc1nc2c(ncn2-c2ccccc2)c(=O)n1-c1ccc(Cl)cc1
CCOc1cc(/C=C2\SC(=O)N(CC(=O)Nc3cccc(C)c3)C2=O)ccc1OCC(=O)N1CCOCC1
CSC(=O)[C@@]1(OC(C)=O)[C@@H](C)C[C@H]2[C@@H]3CCC4=CC(=O)C=C[C@]4(C)[C@@]3(F)[C@@H](O)C[C@@]21C
Cc1ccc2c(c1)nc1s/c(=C\c3cccs3)c(=O)n12
COc1cc(/C=N\NC(=O)c2ccc(C)nc2)ccc1OC(=O)c1ccco1
COc1ccc(CCNC(=O)NCCc2ccc(-c3ccoc3)s2)cc1
Cc1cc([C@H](C)NC(=O)c2cnn(C)c2)c(C)s1
Cc1cc(=O)oc2c1c(C)nn2-c1cccc(C(=O)O)c1
COC(=O)c1c(NC(=O)c2ccccc2F)sc(C(=O)N2CCOCC2)c1C
CC(C)N(C(=O)CN1C(=O)C(Cc2n[nH]c3ccccc23)C(=O)N(c2ccccc2)c2ccccc21)c1ccc2c(c1)OCO2
O=C(NNc1c(Cl)cccc1Cl)c1sccc1Cl
CCOc1ccc(N2C(=O)/C(=C\c3ccc(C(=O)O)cc3)N=C2c2ccccc2)cc1
CCCc1nc(CN2CCN(Cc3noc(CCC)n3)CC2)no1
CC(=O)NCc1ccc(-c2csc(NC(=N)NCCCc3ccccc3)n2)o1
CC(C)n1nccc1NC(=O)[C@@H](C)Sc1nc2ccccc2n1C(F)F
COc1ccc(C)cc1S(=O)(=O)N(C)CC(=O)NCc1ccco1
C=CC(=O)OCC[N+](C)(C)C
Cc1cccc2c1CCNC2=O
O=C1CNC(=S)N1
COc1ccc(-c2cc(N3CC[C@H](NC(=O)c4ccc(F)c(Cl)c4)C3)[nH]n2)cc1
Cc1ccc2nc(N/N=C/c3nc4ccccc4[nH]3)nc(-c3ccccc3)c2c1
Cc1cccc(C[C@H](Nc2ccc3c(c2)C(=O)CC3)C(=O)N[C@H](C#N)COCc2cccc(C(=O)O)c2)c1
CSCC[C@@H](CO)NC(=O)c1oc2ccc(C)cc2c1C
COC(=O)c1ccc(N2CCOCC2)c(NC(=O)c2ccc(C)cc2Cl)c1
Cc1nn(C)c(C)c1CNC(=O)[C@]1(C)Sc2ccccc2NC1=O
O=C1CCC(N2C(=O)c3cccc(NC(=O)CCCCCn4cc(CN5CCN(c6nc(N7CCOCC7)nc(-n7c(C(F)F)nc8ccccc87)n6)CC5)nn4)c3C2=O)C(=O)N1
c1ccc(-n2nnnc2N2CCN(CC3CCCC3)CC2)cc1
COc1ccccc1NC(=O)c1ccc(NS(=O)(=O)c2ccc(F)c(Cl)c2)cc1
C[C@H]1CCC[C@@H](C)N1Cc1ccc2oc(-c3cccc(F)c3)nc2c1
CCCN(CCC)CCCc1ccc(OC)c(OCCc2ccccc2)c1
C/C(=N\NC(=O)c1ccc(-n2cccc2)cc1)C(=O)Nc1ccc(F)cc1
O=C(Nc1cc(Cl)c(Cl)c(Cl)c1)c1cc(Br)cc(Br)c1O
CC(C)(C)c1ccc(C(=O)NCCCN2CCN(CCCNC(=O)c3ccc(C(C)(C)C)cc3)CC2)cc1
COc1ccc(Cl)cc1NC(=O)N1CCC[C@@H](Cn2cnc3cccnc32)C1
Clc1ccc(Nc2nnc(Cc3ccncc3)c3ccccc23)cc1Cl
Nc1nc(N)c2ncc(C(=O)c3ccccc3)nc2n1
CC(C)Oc1ccc([C@@H](CC(=O)N2CCCC2)C(C)C)cc1
CCn1c(SCC(=O)Nc2cccc3ccccc23)nc2ccccc2c1=O
COc1ccc(C2=NN3[C@@H](C2)c2cc(Cl)ccc2O[C@@]3(C)c2ccc([N+](=O)[O-])cc2)cc1OC
Cc1ccc(-c2csc(N/N=C/C=C/c3ccccc3)n2)cc1
CC(C)Cc1ccc2c(c1)C1(COC(N)=N1)C1(COC1)C1(CCC1)O2
COc1cccc(NS(=O)(=O)c2ccc(OCC(=O)Nc3ccc(S(N)(=O)=O)cc3)cc2)c1
COc1ccc(C)cc1Nc1nc(-c2c[nH]c3ccccc23)cs1
O=C(NC(=O)c1ccc(C(=O)O)cc1)N[C@@H]1O[C@H](CO)[C@@H](O)[C@H](O)[C@H]1O
CC(=O)O[C@H]1CC[C@@]2(C)[C@@H](CC[C@]3(C)[C@@H]2C(=O)C=C2[C@@H]4C[C@@](C)(C#N)CC[C@]4(C)CC[C@]23C)C1(C)C
Cc1cccc(N=C(S)NCc2ccccc2)c1C
O=C1NC(=S)S/C1=C\c1nc2ccccc2[nH]1
c1ccc2nc(OCc3cn4c(-c5cnc(N6CCNCC6)nc5)cnc(N5CCOCC5)c4n3)ccc2c1
O=[N+]([O-])c1ccc(/C=N/c2ccc3c(c2)OCCO3)s1
CCN(c1ccc(F)cc1F)S(=O)(=O)c1cc([N+](=O)[O-])ccc1C
Cc1cccc(C)c1NC(=O)COc1ccccc1C(=O)Nc1ccc(Br)cn1
COCCn1c(C)cc(O)c(C(c2ccccc2OC)N2CCCCC2)c1=O
COc1ccc(NC(=O)c2cccc(OCC(C)C)c2)cc1-c1ccc(CO)o1
C[C@@H]1CCCC[C@H]1N1C(=O)/C(=C/c2cccc(OCC(=O)O)c2)S/C1=N\c1ccccc1
Cc1ccc(=O)n(CC(C)C(=N)S)n1
N#Cc1ccc2[nH]cc(CCCCN3CCN(c4ccc5c(c4)CCCO5)CC3)c2c1
CC(=O)Nc1ccc(N/C=C2/CCCC2=O)cc1
CC[C@H](C)[C@H](NC(=O)[C@H](Cc1ccc(O)cc1)NC(=O)c1[nH]c2c(OCCCCCCCN)cccc2c1CCCCCCCCN)C(=O)N[C@@H](CC(C)C)C(=O)O
CN(C)C(=NC[C@H]1CCOc2ccccc21)N(C)C
Cc1ccc(C)n1-c1nccc(-c2cccs2)n1
O=C(Nc1cc(C2CCOCC2)[nH]n1)c1ccc2cc[nH]c2c1
Oc1nc2cc(CN3CC=C(c4ccccc4)CC3)ccc2c2ccccc12
COc1ccc(Br)cc1CCC(=O)N1CCC[C@H]([C@H](C)N)C1
CCC(=O)Nc1ccc(S(=O)(=O)N2CCc3ccccc3[C@H]2CC(=O)Nc2ccc(Cl)cc2)cc1
COc1cc2cc(C3CCCC3)cnc2cc1OC
CC(C)COc1ccc(-c2nc(N)[nH]c(=O)c2C#N)cc1C(F)(F)F
CCc1cccc(C)c1NC(=O)c1ccc(CN2CCc3ccccc3C2)cc1
COCCNC(=O)CNC(=O)C1CCN(S(=O)(=O)/C=C/c2ccccc2)CC1
CCOc1cc([C@H]2C(C(=O)c3ccc4c(c3)C[C@@H](C)O4)=C(O)C(=O)N2c2nc3ccc(C)cc3s2)ccc1OCCC(C)C
COc1ccc([C@H]2C[C@@H](C(F)(F)F)n3nc(C(=O)Nc4c(C)nn(Cc5c(Cl)cccc5Cl)c4C)cc3N2)cc1OC
CC(C)c1cc(Oc2ccc(Cl)cc2)nc(SCc2cccc(C#N)c2)n1
C[C@H](C(=O)NCc1ccc(C(F)(F)F)nc1N1CCC(c2ccccc2)CC1)c1ccc(NS(C)(=O)=O)c(F)c1
COC(=O)c1cccc(NC(=O)c2cccc(C)c2)c1
CC(=O)O[C@@H](C)[C@@H](/C=C/[C@@H]1O[C@@H]1[C@H]1CC=CC(=O)O1)OC(C)=O
CC(=O)NCc1cc2n(n1)CCN(Cc1ccc(C)c(F)c1F)C2
CCC(=O)C1(N2CCCCC2)CCN(CCCC(=O)c2ccc(F)cc2)CC1
O=c1cc(-c2ccc3c(c2)CCO3)[nH]c2c(-c3ccccc3)cnn12
CC(C)(C)c1noc(CCC(=O)N(Cc2cccc(F)c2)C2CC2)n1
CCN(CC)C(=O)[C@H](c1ccccc1)N1CC(n2cccn2)C1
COc1ccc(Cl)cc1NC(=O)[C@@H](C)Oc1ccc(C(=O)c2ccccc2)cc1
CCOc1ccc(CN2CCC(Cc3ccccc3)CC2)cc1
CCN1CCC[C@@H]1CNC(=O)C1CCC(CNS(=O)(=O)c2ccccc2)CC1
O=C(Nc1nc(-c2ccc(Cl)cc2)cs1)C1(c2ccc3c(c2)OCO3)CC1
CCOc1ccc(NC(=O)[C@H]2CC(=O)N(c3ccc(Cl)cc3)C2)cc1
COc1cccc(OC)c1-c1ccc(C[C@H](NC(=O)[C@]2(C)CCCN2S(=O)(=O)c2cc(Cl)cc(Cl)c2)C(=O)O)cc1
CCCCNC(=O)C(Cc1ccco1)(NC(C)=O)C(=O)OCC
CC(=O)Oc1ccc2c(ccc3oc([N+](=O)[O-])cc32)c1
COCCCN(C)S(=O)(=O)Nc1ccc2ccc3ncc(-c4cnn(C)c4)cc3c(=O)c2c1
c1ccc(N2CCc3c(nnn3CC3CC3)C2)cc1
CCOC(=O)c1cc2cc(CC(=O)c3ccc(O)cc3O)ccc2o1
CCOC(=O)C1(C)C=CC=[N+]1[O-]
CN1CCC(NCc2ccncc2)CC1
O=C(C1CC1)N1CC[C@@H](Cc2n[nH]c(=O)n2-c2ccc(-c3ccc4cnccc4c3)cc2F)C1
COc1ccc(C(=O)c2c(OC)cc(OC)c(-c3ccnn3C)c2O)cc1
Cc1cc(C)c(/C=C/[C@@H]2C[C@@H](O)CC(=O)O2)c(-c2cc(C)c(F)c(C)c2)c1
COCc1c(C(=O)Nc2ccc(-c3nn4c(C)nnc4s3)cc2C)noc1C
COc1ccc(Cl)cc1CNC(=O)Cn1c(C)cnc(NCCC2CCCCN2)c1=O
COc1ccc(Cl)cc1N([C@H](C)C(=O)NCc1ccc(N2CCCCC2)cc1)S(C)(=O)=O
N#Cc1cccnc1Oc1ccc(C=O)cc1
COc1ccc(CCN2CC(=O)N3CCc4c([nH]c5ccc(F)cc45)[C@@]3(C)C2=O)cc1
CC1Cc2c(Cl)cccc2N1C(=O)Cc1nc(N2CCOCC2)c(F)c(=O)n1C
COc1ccc(C(=O)Nc2ccccc2)cc1S(=O)(=O)N1CCN(c2ccccc2)CC1
Cc1ccc(N2C(=O)CN(Cc3sccc3C)C2=S)cc1C
O=C(CCc1nc2ccccc2s1)N1CCC(OCCOc2ccccc2)CC1
CN(C)CCNc1ncnc2c1ncn2[C@H]1CN(Cc2ccc(F)cc2)C[C@@H](CO)O1
Cc1ccc(CN(C(=O)COc2ccc(Br)c(C)c2)[C@@H](Cc2ccccc2)C(=O)NC2CCCCC2)cc1
Cc1ccc(/N=C2\S/C(=C\c3cc(Br)ccc3OCC(=O)O)C(=O)N2c2ccc(C)c(C)c2)cc1C
COCCNC(=O)Cc1cn2c(n1)[C@@H](C)N(Cc1ccsc1)CC2
COc1ccc2c(c1)nc(CNC(=O)NC1CCCC1)n2C
CCCCCCC#Cc1ccc(CO[C@H]2CN[C@H](C(=O)NCCc3ccccn3)C2)cc1
CCc1c(NC(=O)c2ccc(-c3ccc(F)cc3)cc2)ccc2cc(CN3CCCC3)cnc12
CN1CCN(c2nc3c(c(=O)n(C)c(=O)n3C)n2Cc2ccccc2Br)CC1
O=C(c1ccc2ncc(-c3cccc(NC4CCNCC4)n3)n2c1)N1CCOCC1
COc1cccc([C@@H](CN2CCN(C(=O)Cc3ccc(OC)c(OC)c3)CC2)OCc2ccc(C#N)cc2)c1
CCc1ccc(S(=O)(=O)Nc2ccc(-c3ccc4nnc(C)n4n3)cc2)s1
COc1nc(SC)ncc1/C=C1/SCCN1C(=O)C1CCCCC1
CCc1ccc(-c2noc(-c3ccc(CS(=O)(=O)c4ccc(Cl)cc4)o3)n2)cc1
Cc1oc(-c2cccc(C(F)(F)F)c2)nc1CN1CCOCC1
CCCCC[C@@H](C)NC(=O)N1CCCC[C@@H]1C
NC(=O)c1nsc(C(=O)N(Cc2ccco2)[C@@H](C(=O)NCc2ccc(F)cc2)c2ccc(O)cc2)c1N
COC(=O)c1ccc2c(c1)c1nc(N3CCC[C@@H](N)C3)n(Cc3ccccc3Cl)c1c(=O)n2C
C[C@@H](NS(=O)(=O)c1cc(Br)ccc1F)C(=O)N1CCCC1
Cc1ccccc1C#Cc1ccccc1
O=C(c1cccc(Cl)c1)N1CCN2C(=O)[C@@H]3CSCN3C(=O)[C@H]2C1
CCCCN1CC=C(c2nc3cc(Cl)ccc3o2)CC1
CCCCCCCCCCCCCCCCCCOCC(CCP(=O)([O-])OCC[N+](C)(C)C)n1ccnc1
Cc1noc(C)c1C(=O)Nc1ccccc1C(=O)NCC(C)C
O=C(CSc1nnc(-c2ccncc2)n1C1CC1)Nc1nncs1
Cc1cc(Nc2cc(-c3ccc(OC4CCOCC4)c(C#N)c3)ccn2)no1
CN(C)CCc1ccc(Nc2ncc(Cl)c(-c3ccc(C(C)(C)N)cc3)n2)cc1
COc1ccc([N+](=O)[O-])cc1CN1CCOCCOCCN(Cc2ccc([N+](=O)[O-])cc2OC)CCOCC1
CC(C)[C@@H](C)NC(=O)CC[C@H]1Cc2ccccc2NC1=O
O=C(N[C@@H]1CN2CCC1CC2)c1c[nH]c2c(F)cccc2c1=O
CCOC(=O)C1CCN(C(=O)/C=C/c2cc(OC)c(OC)c(OC)c2)CC1
Cc1ccc(C)n1-c1ccc(C(=O)N/N=C/c2ccc(O)cc2)cc1
O=C(c1cc2ccccc2[nH]1)N1CCN(CCOC(c2ccccc2)c2ccccc2)CC1
Cc1cccc(C[C@H](N)COc2nc(-c3ccncc3)nc3sc4c(c23)CCCC4)c1
O=C(O)[C@H](Cc1ccccc1)N1C(=O)/C(=C/c2ccccc2OCCc2ccccc2)SC1=S
COc1ccc(OC)c(C2CCN(C(=O)CCc3n[nH]c(N)n3)C2)c1
FC(F)(F)c1cccc(NCCOC[C@H]2CCCO2)n1
CC(Cl)(Cl)C(=O)Nc1ccc(O)c([N+](=O)[O-])c1
Cc1nc2c(c(N3CCC(NC(=O)C4CCN(S(C)(=O)=O)CC4)CC3)n1)CCCC2
COC(=O)C(C)(C)c1ccc(NS(=O)(=O)c2ccc(C)s2)cc1
CC(C)OP(=O)(COCCn1cnc2c(Cl)nc(N)nc21)OC(C)C
O=C1C2CCc3ccccc3C2N1c1ccccc1
O=C(c1cccc(F)c1F)N1CC[C@@]2(O)CCNC[C@H]2C1
COc1ccc(-n2c(CCc3ccccc3)nnc2[C@H](NC(=O)c2cnccn2)c2c[nH]c3ccccc23)c(OC)c1
COc1ccc2c(c1)c(CC(=O)OCCN(C)C)c(C)n2C(=O)c1ccc(Cl)cc1
CC(C)CCN(CC(=O)NO)C(=O)N1CCC[C@H]1C(=O)Nc1nccs1
C[C@@H](N)P(=O)(O)C[C@H](C)C(=O)O
COc1cc(/C=C\C(=O)Nc2cc(S(=O)(=O)N3CCOCC3)ccc2C)ccc1OS(=O)(=O)c1cc(C)ccc1C
Cc1nc2c(-c3ccccc3)nc(SCC(=O)Nc3ccc(C(N)=O)cc3)nc2s1
Cc1ccc(S(=O)(=O)N(C)C)cc1NC(=O)c1ccccc1Br
Cc1c(-c2ccnc3ccccc23)ccc2nc[nH]c(=O)c12
C[C@@H]1CN(CC(=O)N2CC(C)(C)c3ncc(C(F)(F)CC4CC4)cc32)[C@@H](CN2CCOCC2)CN1
COC(=O)c1cccc(-c2ccc(/C=C/C(=O)c3ccccc3)o2)c1
COc1ccc(-c2nn(C(C)C)c3ncnc(N)c23)cc1C
Cc1ccc(Nc2ncnc3[nH]cnc23)cc1
COc1cc(/C=N/NC(=O)CCC(=O)Nc2ccc(Br)cc2)ccc1O
C[C@H](NC(=O)CSCc1ccccc1Cl)c1nncn1C
CC(C)=CC(=O)N[C@H](C)c1ccc(NS(C)(=O)=O)cc1
COc1cc(/C=C2/NC(=O)N(Cc3ccc(Cl)c(Cl)c3)C2=O)ccc1O[C@H](C)C(=O)O
CN(C[C@H]1Cc2c(cccc2N2CCN(c3ccccn3)CC2)CN1)[C@H]1CCCc2cccnc21
O=C(O[C@H]1CCOC1=O)C1CCN(S(=O)(=O)c2ccc(Cl)c(C(F)(F)F)c2)CC1
Cc1ccccc1OCc1n[nH]c(SCC(=O)Nc2cccc(F)c2)n1
NS(=O)(=O)c1cc(NCc2cnc(C3CC3)nc2)ccc1Cl
NS(=O)(=O)OC[C@H]1C[C@@H](Nc2cc(N[C@H]3CCc4c(Cl)cccc43)ncn2)[C@H](O)[C@@H]1O
CC(C)(C)NC(=O)[C@H]1N(Cc2cccnc2)C(=O)[C@@H]2[C@H](C(=O)Nc3ccccc3F)[C@]3(C)C=C[C@@]12O3
CC(C)(O)[C@@H](NC(=O)Nc1cc2[nH]nc(N)c2cn1)c1ccc(F)cc1
CNC(=O)c1sc2ccc(NC(=O)c3ccoc3)cc2c1OC
CCCCOC(=O)N[C@@H](CNC(=O)CC1CC(C2CCNCC2)=NO1)C(=O)O
O=Cc1c(C(F)(F)F)ccc(Cl)c1F
O=C(Nc1ccc(N2CCOCC2=O)cc1)[C@H]1Cc2ccccc2CN1C(=O)Cc1ccc(Cl)cc1
CCCn1c(=O)n(CCC(=O)NCCC2=CCCCC2)c2ccccc21
Cc1ccc2ccccc2c1CNCC(O)c1ccc(Cl)c(Cl)c1
O=C(CN(C(=O)c1ccc(Cl)cc1)N1C(=O)CCCC1=O)c1ccc(OC(=O)c2ccccc2)cc1
O=C(CCCC(=O)N(CC(=O)NC1CCCC1)Cc1ccccc1Cl)Nc1ccccn1
O=C(c1ccn2c(-c3ccccc3)nnc2c1)N1CCN(c2ccc(Cl)cc2)CC1
COc1ccc(C)cc1C(=O)N1CCCN(CC2CC2)[C@@H](C(C)C)C1
CCC1(O)CN(C(=O)Nc2cccc(Oc3ccc(C#N)cc3)c2)C1
O=C(O)CN1CN(Cc2ccc(C(F)(F)F)cc2)S(=O)(=O)c2cc(F)ccc21
Cc1cc(-c2ccccc2)nc(SCC(=O)c2cc(C)n([C@@H]3CCS(=O)(=O)C3)c2C)n1
NS(=O)(=O)c1ccc(-n2cc(-c3ccccc3)nn2)cc1
CC(=O)O[C@@]12CO[C@@H]1C[C@H](O)[C@@]1(C)C(=O)[C@H](O)C3=C(C)[C@@H](OC(=O)[C@H](OC(=O)c4cnc5ccccc5c4)[C@@H](NC(=O)OC(C)(C)C)c4ccccc4)C[C@@](O)([C@@H](OC(=O)c4ccccc4)[C@@H]12)C3(C)C
CCN(CCc1ccc(F)cc1)C(=O)C1CCN(CCCN(C(=O)C2CCN(C(C)=O)CC2)c2cccc(Cl)c2)CC1
CCOC(=O)Nc1cc(C(=O)OC)ccc1C
C/C(Cc1ccccc1)=N\NC(=O)CNC(=O)c1ccc(Br)cc1
O=C(NCc1coc(-c2ccccc2)n1)N1CC[C@@H](F)C1
CCOC(=O)CNC(=O)C1(/C=C/c2ccccc2)CC(=O)N1c1ccc(C)cc1
CCN(CCN1CCCCCC1)C(=O)COc1cccnc1
O=C(O)[C@H](c1cc2ccccc2o1)N1CCN(Cc2ccsc2)CC1
COc1cc(NC(=O)CN(C)C)c(Cl)cc1NC(=O)Nc1cnc(C#N)cn1
CCOC(=O)c1ccccc1NC(=O)Cn1c(=O)n(-c2cccc(C)c2)c(=O)c2sccc21
CCCCNC(=O)[C@@H](CC)N(Cc1ccc(OC)cc1)C(=O)CN(c1ccc(OCC)cc1)S(C)(=O)=O
COc1cc(Br)cc(/C=N/NC(=O)c2ccccn2)c1O
Nc1ncccc1NCc1cc(-c2ccc3cc[nH]c3c2)ccc1OCc1ccccc1
N=C1/C(=C\c2cccn2Cc2ccccc2)C(=O)N=C2SC(SCc3ccccc3)=NN12
C#CCCc1nc(=O)c2c(-c3ccccc3)c(C(=O)c3ccccc3)[nH]c2[nH]1
O=C(NC(CO)c1cccc(Cl)c1)c1ccc2[nH]nc(-c3ccc(O)c(F)c3)c2c1
C/N=C(\S)N(C)CCCCn1nc(-c2ccccc2)ccc1=O
CC(=O)Nc1ccc2nc(NC(=O)c3ccco3)sc2c1
O=C(/C=C\c1ccco1)c1ccc(Cl)cc1Cl
CCN1C(=O)/C(=C\c2cc(C)n(-c3sc4c(c3C(=O)Nc3ccccc3)CCCC4)c2C)C(=O)N(c2ccc(Cl)cc2)C1=S
C[C@H]1CC2C3Cc4ccc(O)c5c4C2(CCN3CC2CC2)C(O5)C1=O
O=C(C[C@H]1C=CCC1)N1CCCC[C@H]1c1nc[nH]n1
Cn1c(C(=O)N[C@@H]2CCOC(C)(C)C2)cc2ccccc21
Nc1cccc(OC[C@@H]2C[C@@H]2c2ccccc2)c1
O=S(=O)(NCc1ccccc1CN1CCCC1)c1c[nH]c2cccc(F)c12
CS(=O)(=O)c1ncn([C@@H]2O[C@@H](CO)[C@@H](O)[C@H]2O)n1
COc1ccc(N2C(=O)NC(=O)/C(=C\c3cc(Cl)ccc3OCC(=O)Nc3ccc(C)c(C)c3)C2=O)cc1
CC(C)c1ccc2oc(-c3ccc(NC(=S)NC(=O)c4cc5ccccc5o4)cc3)nc2c1
Cc1cc(C)c2c(c1)CC1(Cc3cc(C)c(C)cc3C1=O)C2=O
CC(=O)c1ccc(C(=O)N2CCN(c3ncnc4ccccc34)CC2)s1
CC(C)CCN/C(N)=N/Cc1ccco1
COc1ccc(NC2=C3NC(=O)/C(C)=C\C=C\[C@H](C)[C@H](O)[C@@H](C)[C@H](O)[C@H](C)[C@H](OC(C)=O)[C@H](C)[C@@H](OC)/C=C/O[C@@]4(C)Oc5c(C)c(OC(=O)c6ccccc6Cl)c(c(c5C4=O)C2=O)C3=O)cc1
O=C(NCC(c1cccnc1)N1CCN(c2ccccc2F)CC1)c1ccc(F)cc1
CO[C@@]12[C@H](COC(N)=O)C3=C(C(=O)C(C)=C(N)C3=O)N1C[C@H]1[C@H]2N1C(=O)Sc1ccccc1
COc1cccc(NC(=O)CSCc2cnn(-c3ccccc3)c2-n2cccc2)c1
Cc1ccc(-c2ccc(/C=C(\Sc3nnc(C)o3)C(=O)O)o2)c([N+](=O)[O-])c1
C=C(C)[C@@H]1CC[C@@H]2[C@]3(CC[C@]4(C)[C@@H]([C@H](CO)CC[C@@H](O)C(=C)C)CC[C@@]24C)C[C@]13CCC(=O)O
CCOC(=O)c1cccc(NC(=O)CCc2nnc3ccc(N4CCCCC4)nn23)c1
Cc1nc(C)c(-c2nn3c(-c4cc(Cl)ccc4F)nnc3s2)s1
CSc1ccc(C(=O)N2CC(=O)N(CC3CC3)CC(O)C2)cc1
Cc1ccc(C)c(S(=O)(=O)N2CCCOC2CNC(=O)C(=O)NC2CCCCC2)c1
CN1CCOc2ccc(NC(=O)N[C@@H]3CC[C@H](c4ccccc4)C3)cc21
CS(=O)(=O)NCC[C@@]12CCO[C@@H]1CCN(C1CCOCC1)C2
Cn1nc(C(=O)N2CCC[C@H](C(=O)NC3CC3)C2)c2c1CCNC2
C[C@H](NS(=O)(=O)Cc1ccc(Cl)cc1)[C@@H](Cc1ccc(Cl)cc1)c1cccc(C#N)c1
CC(C)(C)OC(=O)N1CCCC(n2cnc3ccc(O)nc32)CC1
CC1=C[C@@H]2N(c3ccc(C)cc31)[C@H](C(=O)c1cccs1)[C@@H](C(=O)c1ccc3c(c1)OCO3)[C@]21C(=O)Nc2ccccc21
CCOc1ccc(-c2c3c(c(O)c4ncccc24)C(=O)N(Cc2ccc(F)cc2)C3)cc1
COC(=O)[C@@H]1C[C@@H](NC(=O)C(=O)Nc2ccc(Cl)cc2)[C@H](c2ccccc2)N1
CCN1C(=O)CCC1(O)c1cccc(C(F)(F)F)c1
Nc1nc(SCCc2ccccc2)nc2sc3c(c12)CCN(Cc1ccccc1)C3
O=C(Nc1cc(Cl)ccc1Oc1ccccc1)c1nc2ccccc2c(=O)[nH]1
CN(C)Cc1c(O)ccc2c(=O)c(-c3ccc(Br)cc3)coc12
COc1cccc(NC(=O)COc2ccc(C(F)(F)F)cc2)c1
Cc1ccccc1OC[C@H](O)C(=O)N1CCN(c2nc3ccccc3s2)CC1
CCOP(=O)(CC(=O)NCc1ccco1)OCC
CCOC(=O)c1ccc(NC(=O)O/N=C(/Cl)CCl)cc1
COC(=O)c1[nH]c2ccc(Cl)cc2c1NC(=O)CCN1C[C@H]2C[C@H]1CC(C)(C)C2
Cc1cc(S(=O)(=O)N2CCN(c3ccc(Cl)c(Cl)c3)CC2)ccc1Cl
Cn1c(=O)c2cc(S(=O)(=O)N3CCOCC3)ccc2n(C)c1=O
CCOC1(OCC)C2c3ccccc3C(C1C)[n+]1ccccc12
O=C(O)c1ccc(N2C(=O)[C@@H]3[C@@H](ON(c4ccccc4)[C@H]3c3ccccc3Cl)C2=O)cc1
CC1CCc2cc(F)cc3c(CCN)cn1c23
Cc1ccc(-n2c(-c3ccco3)nc3c(cnn3-c3ccccc3C)c2=O)cc1
COc1cc2c(cc1OC(C)=O)[C@@H]1CCc3cc(OC)c(OC)c(OC)c3[C@H]2CN1C(=O)C(F)(F)F
COc1cccc(-c2ccc(C#N)c(OC(=O)c3c(Cl)cccc3Cl)n2)c1
COc1ccc(CN2C(=O)[C@H](N)[C@@H]2c2ccc3c(c2)OCO3)cc1OC
O=C(Nc1ccc(-c2nc3ccccc3s2)cc1)c1ccc(S(=O)(=O)N2CCCCCC2)cc1
O=C(O)[C@@H](C1CCCCC1)N1C[C@H](CN2CCC(c3nc(-c4ccccc4)c[nH]3)CC2)[C@@H](c2ccccc2)C1
CC(C)CCNC(=O)c1c[nH]c2ccc(S(=O)(=O)Nc3cccc(C(F)(F)F)c3)cc2c1=O
CNC(=O)[C@@H]1C[C@H](N)CN1C(=O)CCS(=O)(=O)c1ccc(C)cc1
C[C@@H](NC(=O)CSc1nnnn1-c1ccccc1)[C@@H]1C[C@H]2CC[C@H]1C2
CC[C@H](Sc1ccc(C#N)c(C(F)(F)F)c1)C(N)=O
CC(C)N1C(=O)[C@](C)(CC(=O)O)C[C@H](c2cc(F)cc(Cl)c2)[C@H]1c1ccc(Cl)cc1
O=C1c2cccn2[C@H]2CN(CC3CC3)C[C@H]2N1Cc1ccccc1
O=C(CNC(=O)c1ccc(Cl)cc1)Nc1ccc(S(=O)(=O)Nc2ncccn2)cc1
COC(=O)[C@]1(C)N[C@H](c2ccc(C)cc2)[C@@H]2C(=O)N(c3ccc(C)cc3)C(=O)[C@@H]21
CN(C)CC1CC1c1cc(F)ccc1S(=O)(=O)Nc1ccc2c(c1C(=O)O)CCCC2
COc1ccc(C(=O)Nc2ccc(N3CCC(N[C@H](C)c4nc5ccccc5[nH]4)CC3)cc2)cc1
COc1ccc(NC(=O)N2CCNCC2CCc2cccnc2)cc1
CCCn1c(SCC(=O)NC[C@@H]2CCCO2)nc2nc(N3CCC(C)CC3)sc2c1=O
COc1cccc(/C=C\C(=O)NCc2sccc2C)c1OC(F)F
CC(=O)n1c2ccccc2c2cc(-c3ccc4ccccc4c3)nnc21
COc1cc(F)cc(CNC(=O)Nc2ccc(C)cc2-c2nc(C3CC3)no2)c1
O=C(CCc1c(F)cccc1F)NS(=O)(=O)c1ccc2c(c1)OCCO2
Nc1ccc2c(c1)C(=O)N(C1CCC(=O)NC1=O)C2
Cc1ccc(S(=O)(=O)N2CCN(C(=O)CCc3nc(O)c4ccccc4n3)CC2)c(C)c1
NCC(=O)Nc1ccc(Cl)cc1
O=C(CCCCCCCCc1ccc2c(c1)OCO2)c1c(O)cccc1O
O=C1C(N2CC2)=CC(=O)c2nc(-c3ccccn3)ccc21
Cc1ccccc1Oc1ccc(C(=O)N(Cc2ccc(C(=O)O)cc2)CC2CCC2)cc1
COc1cccc(CN(C(=O)CN(c2cccc(Br)c2)S(C)(=O)=O)[C@@H](Cc2ccccc2)C(=O)NC2CCCCC2)c1
C[C@H](OC(=O)CN1C(=O)NC2(CCCC2)C1=O)C(=O)Nc1cc(C(F)(F)F)ccc1Cl
COc1cccc(C(=O)NCCCCCN2CCN(c3cccc(Cl)c3Cl)CC2)c1
CC(C)C1=NO[C@@H](C(=O)N(C)Cc2cccc(CN(C)C)c2)C1
Cc1ccc(NC(=O)COc2ccc(C3C4=C(CC(C)(C)CC4=O)OC4=C3C(=O)CC(C)(C)C4)cc2Cl)cc1C
CCCNC(=O)[C@@H](C)N(Cc1ccccc1Cl)C(=O)CN(c1ccc(C)cc1)S(C)(=O)=O
N=C(N)Nc1ccc(CNC(=O)CCNC(=O)OCc2ccc(COC(=O)NCCC(=O)NCc3ccc(NC(=N)N)cc3)cc2)cc1
Cc1nn(C)c(C)c1CCC(=O)N1CCCC[C@@H]1c1nc2ccccc2[nH]1
CC(C)c1nnsc1CN1CC[C@@]2(C1)CN(C)C(=O)O2
Cn1ccnc1[C@H](NC(=O)C[C@@H](NC(=O)c1ccccc1Cl)c1ccccc1)c1ccc(F)cc1
Cc1ccc(N2CC(O)Cn3c2nc2c3c(=O)[nH]c(=O)n2C)cc1
O=c1c2ccccc2nc2n1CCC2Cc1ccc(OCCCN2CCCCC2)cc1
CC1(C)C=C/C(=N\Nc2nc(-c3ccc(Cl)cc3)cs2)CC1
O=C(NC1CCCC1)[C@@H](c1ccc(Cl)cc1)N(C(=O)c1ccco1)c1ccc2c(c1)OCO2
C[C@H]1COC(=O)CC/C=C\C[C@H](CC(=O)N(CCO)Cc2ccccc2)C(=O)N1
CN1CCN(c2c(F)cc3c(=O)c(C(=O)O)c4n5c3c2N(C)CC5CS4)CC1
COc1ccc(CN2CCN(C(=O)c3ccccc3C)CC2)cc1F
Cc1cccc([C@@H](C(=O)O)N2CCN(S(=O)(=O)N3CCN(C)CC3)CC2)c1
CSCc1noc(CN[C@H]2CCCC(C)(C)C2)n1
Cc1ccc(OCCn2cc(/C=C3/C(=N)N4N=C(c5ccccc5Cl)SC4=NC3=O)c3ccccc32)c(C)c1
O=C(COCc1nc2ccccc2s1)Nc1nc2c(s1)CCCCC2
COc1cc(OCc2cccc(-c3ccc4c(c3)OCO4)c2)c2cc(-c3cn4nc(OC)sc4n3)oc2c1
Cc1cccc(NC(=O)Nc2cccc3c2C2CC4(CCN2C3=O)SCCS4)n1
CCOC(=O)N1C(=O)NC(=O)[C@H]1c1ccc(OC)cc1
CN1CCC[C@H](C(=O)Nc2ccc(-n3cc4cccc(C(N)=O)c4n3)cc2)C1
CCSc1ccc(-c2ccccn2)c2c1C(=O)CC(C)C2
CNC(=O)OCN1C(=O)[C@@H]2CC=CC[C@H]2C1=O
Cc1ccc2c(c1)C(=C1C(=O)NC(=O)NC1=O)C(=O)N2
CC(C)=C1[C@H]2CC[C@@H]1[C@@H](C(=O)NCCc1cccc(Cl)c1)[C@H]2C(=O)O
CC(=O)[C@@H]1CC[C@@H]2[C@H]3CC[C@H]4C[C@@H](OC(=O)CCC(=O)O)CC[C@]4(C)[C@@H]3CC[C@@]12C
Cc1cc[s+](-c2c(C3CCC(S(C)(=O)=O)CC3)occ(Cl)c2=O)c1
O=C(NCc1ccccc1)N1CCC[C@@H](Cc2nncn2-c2ccccc2)C1
Cc1cc(C)nc(SCC(=O)Nc2ccc(N3CCOCC3)c(Cl)c2)n1
COCc1ccc(CNC(=O)C(=O)Nc2cnc3ccccc3c2)cc1
CCc1ccc(C)c(OC(=O)c2cc(OC)c(OC)c(OC)c2)c1
O=C(Nc1ccc(Br)cc1C(=O)O)c1ccc(S(=O)(=O)N2CCc3cc(Cl)ccc32)cc1
CCS(=O)(=O)C[C@@]1(c2ccc(F)cc2)OC[C@@H](CO)O1
CN1Cc2ccccc2C[C@@H]1CN(CCCCN)[C@H]1CCCc2cccnc21
O=CN1CCN(S(=O)(=O)Cc2ccccc2F)CC1
C=CCNC(=O)[C@@H](C)N1CCN(Cc2ccc(OC(F)(F)F)cc2)CC1
O=C(Cc1ccsc1)NCCC1CCN(C(=O)Nc2cc(F)ccc2F)CC1
CC1(C)C2CCC1(CS(=O)(=O)N1CCCc3ccccc31)C(=O)C2
CC/N=C1\S[C@H](CC(=O)Nc2cccc(NC(=O)C[C@@H]3S/C(=N/CC)N(CC)C3=O)c2)C(=O)C1CC
CO[C@@H]1C=C(C)[C@](O)(/C=C/C(C)=C\C(=O)O)C(C)(C)C1
CCSCCO[C@]12CCCC[C@@]1(S(=O)(=O)c1ccc(Cl)cc1)c1c(F)ccc(F)c1OC2
COc1ccc(-c2nn(-c3ccccc3)cc2CN2C[C@H](C(N)=O)Oc3ccccc32)cc1
N#Cc1cc(N)c(Sc2ccc(Cl)cc2)n1Cc1ccccc1
COc1ccc(-c2nnc(SCC(=O)NCCN3C(=O)S/C(=C/c4cccnc4)C3=O)n2C[C@@H]2CCCO2)cc1
Cc1sc2c(N[C@@H]3CCNC3)nc(-c3ccncc3)nc2c1C#CC(C)(C)O
Cc1cccc(C(C)C)c1NC(=O)C1CCCN1S(=O)(=O)c1cccc2nsnc12
COc1ccc(NCc2c(O)ccc3ccccc23)cc1
O=c1c([N+](=O)[O-])c(O)c2ccccc2n1Cc1ccccc1
CS(=O)(=O)N1CCC(c2ccccc2)(c2nccn2Cc2ccccc2)CC1
COc1ccc2c(CNCc3ccco3)c(C(=O)O)n(Cc3ccc(F)cc3Cl)c2c1
COc1cc2c(cc1OC)C(=O)C(CC1CCN(Cc3ccc4cccc(O)c4n3)CC1)C2
Clc1ccc2c(N3CCN(CN4CCN(c5ccnc6cc(Cl)ccc56)CC4)CC3)ccnc2c1
COc1ccc(C(=O)N[C@H](CN2CCOCC2)c2ccc(C)cc2)cc1Br
O=C(Cc1ccc(Br)cc1)NCCCN1CCc2ccccc21
COc1cccc(CNC(=O)N2C[C@H](C)O[C@@H](C)C2)c1
CC(=O)CSc1nnc2c3ccccc3nc(C(C)C)n12
CS(=O)(=O)N(CC(=O)Nc1ccc(Cc2ccncc2)cc1)c1cccc(Cl)c1Cl
CN(CCO)c1ccc2nnc(-c3ccccc3Cl)n2n1
O=S(=O)(c1ccccc1)N(C[C@H](O)COCc1ccccc1)c1nc2ccccc2s1
Cc1cccc(-c2nc(C(F)(F)F)ccc2CNC(=O)C(C)c2ccc(CNC(=O)OC(C)(C)C)c(Cl)c2)c1
Cc1ccc(C)c(CC(=O)N[C@@H]2CCNC[C@H]2C)c1
Cc1cc(C)c(-n2c(C)cc([C@H]3[C@H](c4ccccn4)NC(=S)N3c3ccc(OC(C)C)cc3)c2C)c(C)c1
O=C(CN1C(=O)N/C(=C\C=C\c2ccccc2)C1=O)Nc1ccccc1C(F)(F)F
O=C(NCC1CC1)[C@@H]1CC=CCC1
CC(C)n1[nH]c(=O)c2c1N=C(O)C[C@@]21C(=O)N(C)c2ccccc21
O=C(Cn1cnc2c(c1=O)CCC2)[C@H]1CCOC1
C=CCN1CCC(CCCn2c(COc3ccccc3)nc3c(OCCCN4CCCCC4)cccc32)CC1
Cc1nn(C)c2ncc(NC(=O)N[C@H]3CCc4nccn4C3)cc12
Cc1ccc(-c2nc(CCNC(=O)[C@H](C)Oc3ccccc3F)cs2)cc1
COc1c2c(cc3c1[C@H](c1c(O)n(Cc4ccccc4)c(=O)[nH]c1=O)N(C)CC3)OCO2
Cc1cc(C)n2cc(CN3CCO[C@@H](Cn4cccn4)C3)nc2n1
CCOC(=O)c1cn(C)nc1NC(=O)[C@@H]1[C@H]2[C@H]3CC[C@@H](C3)[C@H]21
CCOC(=O)C1=C2c3cc(OC)c(OC)cc3CC(C)(C)N2C(=O)C1=O
Cn1cccc1C(=O)NCCNC(=O)c1nccnc1N
COc1cc2ccnc(Cc3ccc(SC)cc3)c2cc1OCCF
COc1ccc(N[C@H]2c3ncccc3C(=O)N2c2ccc(C)cc2)cc1Cl
CCOc1cc(CN2CCC(NC(=O)c3cncc(C)c3)CC2)ccc1-c1ccc(C(F)(F)F)cc1
CN(CCc1noc(C(F)(F)F)n1)C(=O)[C@H]1CCOc2ccccc2C1
COC(=O)C1CC(O)CN1C(=O)Nc1ccccc1
Cc1c(OCC(=O)Nc2ccc(C(N)=O)cc2)c(=O)ccn1CCC(C)C
CO[C@@H]1OC[C@H](NC(=O)CNC(=O)CCCCCCCCCCCCC(C)C)[C@@H](O)[C@H]1O
CC(=O)N1CCC(NS(=O)(=O)CCN(C)S(=O)(=O)c2ccc(F)cc2)CC1
CNc1cccc([C@H]2CN(Cc3cccs3)CCO2)n1
O=C(Nc1sc2c(c1C(=O)Nc1ccccn1)CCCCC2)c1ccc(F)cc1Cl
Cc1cc(C(=O)Nc2cccc3c2Cc2c-3n[nH]c2-c2ccsc2)no1
Cc1noc(C)c1S(=O)(=O)NC[C@@H]1Cn2cccc2C(=O)N1Cc1ccccc1
CC(C)C(=O)NCc1cccnc1N1CCN(C)CC1
COC(=O)/C=C1/CN2C3CCC2C1C(c1ccc(Br)cc1)C3
Cn1cnn(-c2ccc(NC(=O)c3ccccc3Oc3cccnc3)cc2)c1=O
Cc1ccc(CNc2oc(-c3ccc(F)cc3)nc2C#N)cc1
CCOC(=O)C(=O)Nc1c(C)ccccc1=O
CCCCOc1ccccc1[C@@H]1Nc2ccccc2NC2=C1C(=O)C[C@H](c1ccc(OC)cc1)C2
CC(C)c1cc2cc(C(N)=O)c(N)nc2nc1C(F)(F)F
COc1cc2c(cc1OC)-c1c(-c3cccc(Br)c3)ncn1CC2
Oc1ccc2c3c1O[C@H]1c4nc5ccccc5cc4C[C@@]4(O)[C@@H](C2)N(CC(F)F)CC[C@]314
Nc1cnn2c1N=N[C@H]2SCC(=O)Nc1nnc(SCC(=O)Nc2ccccc2)s1
Cc1cc([C@H](C)NS(=O)(=O)CCCCC#N)c(C)s1
C[C@H](CO[C@@H]1CCOC1)NC(=O)c1cc[nH]c(=O)c1
Cn1c(=O)n(C)c2cc(-c3[nH]c(-c4cccs4)nc3-c3ccccc3)ccc21
CCCCn1c(=O)[nH]c(O)c(C2=Nc3ccccc3S[C@H](c3ccc(OC)cc3)C2)c1=O
CS(=O)(=O)Nc1ccc2c(c1)nc1n2C[C@H](N)[C@@H](c2cc(F)c(F)cc2F)C1
CSc1ccc(CNc2ncncc2-c2nc(-c3ccccc3)no2)cc1
CN1c2ccc(Br)cc2Sc2cc(C(=O)c3ccccc3)ccc21
Cc1ccc(C(=O)[C@H](C)Sc2nnc3nc(C)cc(C)n23)cc1
Nc1ncc(-c2ccc3nc(N)n(-c4ccccc4)c(=O)c3c2)cc1NS(=O)(=O)c1ccc(F)cc1F
COc1ccc(-c2ncc3c(SCC(=O)NCc4cccc(OC)c4)ncnc3n2)cc1
Cc1ccc(S(=O)(=O)Nc2cccnc2)c(C)c1C
CCS(=O)(=O)N1CCC(NC(=O)C2CCCC2)CC1
COc1cc(OC)c2c(c1OC)OCC(Cc1ccc(O)cc1)C2=O
Cc1c(S)[nH]c2ccc(-c3cccc(Cl)c3)cc12
CCOC(=O)C1=NOC(CNC(=O)c2c(-c3ccccc3Cl)noc2C)C1
Nc1nc(O)c2ncn([C@H]3O[C@@H](CO)C=C3F)c2n1
CC(C)Cn1ccc(=O)n(CC(C)C)c1=O
CC(=O)OCCOC(=O)C1CCC(C(C)(O)c2ccc(-c3cc(C)cc(Nc4cc(C(F)F)ccn4)n3)cn2)CC1
CN(C)C(=O)CN1CCN(CC(=O)N2CCS[C@H]2c2ccccc2F)CC1
O=C(CC1(C(=O)O)CCCCCC1)Nc1c(F)cccc1F
CSc1ccc([C@H]2C(S(=O)(=O)c3ccccc3)=C(O)C(=O)N2Cc2ccc3c(c2)OCO3)cc1
COc1ccc(-c2noc(CCNC(=O)c3cc(OC)c(OC)c(OC)c3)n2)cc1
CN(C)C(=O)CO[C@@H]1CSC2(C1)CN(C(=O)c1cnccn1)C2
C[C@]1(CO)C[C@]1(F)n1ccc(=O)[nH]c1=O
CCC(=O)N1CC[C@H](NC(=O)NCc2ccnc(OC3CCCCC3)c2)C1
O=c1[nH]c(=O)c2ccc(-c3ccccc3)cc2[nH]1
CCCCN[C@H]1CC[C@H](OCC#Cc2c(-c3ccccc3)oc3ccccc23)O[C@H]1C
COc1cnc(C(=O)Nc2cnc(F)c([C@]3(C)C[C@@H](C(F)(F)F)OC(N)=N3)c2)c(Cl)c1
CC1CC1c1cc(C(=O)NS(=O)(=O)N2CCC2)c(F)cc1OCC12CC3CC(CC(C3)C1)C2
C[C@H]1CN([C@H](C)CO)C(=O)c2cccc(NC(=O)CCC(F)(F)F)c2O[C@@H]1CN(C)Cc1ccc(Cl)c(Cl)c1
Cc1cn2nc(N(C)Cc3cccc([N+](=O)[O-])c3)sc2n1
OC[C@H]1O[C@@H](Oc2ccc(/C=C\c3cc(O)cc(O)c3)cc2O)[C@H](O)[C@@H](O)[C@@H]1O
COc1ccc(C(=O)[C@@H](OC(=O)c2ccc(N(C)C)cc2)c2ccccc2)cc1
CC(C)(C)NC(=O)CSc1nncn1NCc1c(Cl)cccc1Cl
O=C(CCN(Cc1ccccc1)c1nc(-c2ccccc2)nc2cc(Cl)ccc12)NCc1ccccc1
Cn1c(Cc2cccs2)nnc1SCC(=O)N1CCCCC1
Cc1onc(-c2cccnc2)c1COc1ccc(C(=O)NC(C)C)cn1
CCCc1nnc(S)n1CC(=O)N1CC=C(C(C)(C)C)CC1
CCn1nnnc1SCC(=O)Nc1ccc2c(c1)OCCO2
COc1ccc(Cl)cc1S(=O)(=O)N1CCN(Cc2nc3cc(-c4ccccc4)ccc3o2)CC1
CC(=O)O[C@@]12CO[C@@H]1C[C@H](O)[C@@]1(C)C(=O)[C@H](O)C3=C(C)[C@@H](OC(=O)[C@H](O)[C@@H](/N=C(/O)OC(C)(C)C)c4ccccc4)C[C@@](O)([C@@H](OC(=O)c4ccccc4)[C@H]12)C3(C)C
O=S(=O)(Nc1cc(Cl)ccc1Cl)c1ccc(Cl)cc1
COC(=O)c1ccc(-c2ccc(/C=c3/sc4n(c3=O)[C@H](c3ccc(OC)cc3)C(C(=O)Nc3ccc(C)cc3C)=C(C)N=4)o2)cc1Cl
O=C(N[C@@H]1CCN(Cc2ccccc2)C1)[C@@H]1CCCN(S(=O)(=O)c2ccc(F)cc2)C1
O=C1CCc2ccc(OCCCCN3CCN(c4ccccc4C(F)(F)F)CC3)cc2N1
O=C1NC(=S)S/C1=C\C=C\c1ccccc1OCc1ccccc1Br
CCOc1cccc(CNC2CN3CCC2CC3)c1
O=S(=O)(c1ccc(OCc2cnc(Cl)s2)cc1)N1CCOCC1
c1ccc(O[C@H]2CN(CC3CCOCC3)[C@@H]3CCCO[C@H]23)nc1
COC(=O)c1cc(COC(=O)c2nc3nc(C)cc(C)n3n2)oc1C
Cc1ccc(CN2CCC3(CC2)CC(CC(=O)NC(C)C)CO3)s1
C[C@@H](Cc1ccccc1)N(C)Cc1ccccc1
CCCCCCOC(=O)c1ccccc1N
CC[C@@H](C(=O)N[C@H](C)CC)N(Cc1ccc(Cl)cc1)C(=O)CN(c1ccc2c(c1)OCO2)S(C)(=O)=O
CCCOc1cc(CN2CCN/C2=N\[N+](=O)[O-])cnc1Cl
CSC1=C(C#N)C(c2ccccc2Cl)C2=C(O)c3ccccc3C2=N1
C#CCN(c1ccc(C(=O)N[C@@H](CCC(=O)NC(CCC(=O)O)c2nnn[nH]2)C(=O)O)cc1)C1CCc2cc3nc(C)nc(O)c3cc21
Cn1c(CNC(=O)/C=C/c2ccccc2Cl)nnc1SCC(=O)Nc1cccc(Br)c1
O=C(CC1CCCC1)N1CCC[C@@H]1Cn1nnc(-c2cccnc2)n1
CC(C)C[C@H](NC(=O)[C@H](Cc1cnc[nH]1)NC(=O)OCc1ccccc1)C(=O)N[C@@H](CCCCN)C(=O)c1nc2ccccc2o1
CC(C)CN1CC(=O)N2C[C@H](c3ccc(Cl)cc3)c3c([nH]c4ccccc34)[C@@]2(C)C1=O
CC1(C)COCCN1C(=O)c1nc(N2CCOCC2)ncc1Cl
CCCC[C@@H]1C=C(C(=O)O)[C@H](c2ccc(C)cc2)N1S(=O)(=O)c1ccc(C)cc1
O=C(CNC(=O)c1cccc(C(F)(F)F)c1)NC1CCN(CCCc2ccccc2)CC1
Cc1cc(C(=O)/C=C\c2cccc3c2OCO3)c(C)s1
Cn1c(CN2CCCCCC2)nnc1C1CCN(CCN)CC1
N=C(N)c1ccc(/N=N\c2c(O)ccc3c2[nH]c2ccccc23)cc1
O=C(O)[C@H]1CCC[C@H](CO)C1
COC(=O)CN1C(=O)[C@H]2[C@@H](C1=O)[C@@H](c1ccc(C)o1)N1C(=O)CN(CCO)C(=O)[C@@]21Cc1ccccc1
O=C(CCCN1CCN(C(=O)Cc2ccccc2)CC1)NO
CCCN1CCN(C(=O)c2ccc(=O)[nH]n2)C[C@H](Cc2ccc(-c3ccccc3)cc2)C1=O
C=CCOc1ccc(/C=C(\C)C(=O)N[C@@H]2[C@H](O)[C@@H](O)[C@H]3OCO[C@H]3[C@@H]2O)c(OC)c1
COc1cccc(NC(=O)c2cc(-c3ccncc3)[nH]n2)c1
C[C@@H]1C[C@@H]1C(=O)N1CCC[C@H]2CCCC[C@@H]21
CC1(C)CCC[C@@]2(C)C1=C[C@H]1C(=O)[C@H](c3ccccc3Br)[C@H]12
CCOc1ccc(-n2c(-c3ccc(Cl)cc3)c[n+]3c2SCC3)cc1
Cc1nc(-c2ccc(C(F)(F)F)cc2)sc1C(=O)NCc1ccc(OC(C)(C)C(=O)O)cc1
COCCNc1ccc(CNC(=O)NC(C)C)cc1
COc1ccc(C(CC(=O)NCCN2CCOCC2)NS(=O)(=O)c2ccc(Cl)cc2)cc1
Cc1ccccc1OC[C@@H](N)C1CC1
COc1ccccc1NC(=S)N(Cc1cc2cc3c(cc2[nH]c1=O)OCCO3)C1CCCC1
NC(=O)CCN1CCC[C@H](C(=O)O)C1
Cc1nc(CCNC(=O)C[C@@H]2C(=O)N(C)C(=O)N2C)nc2c1CCCC2
OC[C@H]1O[C@@H](c2cc3ccccc3[nH]2)[C@H](O)[C@@H](O)[C@@H]1O
CCOc1nnc(CN2CCC[C@@H]2c2c(C)nn(C)c2C)s1
O=C(/C=C/c1ccccn1)N1CCO[C@@H](c2ccccc2Cl)C1
O=C(Nc1n[nH]c(Cc2ccc(F)cc2)n1)c1cc(-c2ccco2)[nH]n1
COc1cccc2c([C@H](C(=O)O)N3CCN(c4ncccc4C#N)CC3)c[nH]c12
N#Cc1ccc(OCCNCCCCN2C(=O)C3CCCN3C2=O)cc1
CC(C)(C)NCCNC(=O)[C@@H]1CCCN(CC(F)(F)F)C1
NCC(=O)N1CCC[C@H]1C(=O)NCC(=O)Nc1ccc(N(CCCl)CCCl)cc1
COCCn1ccc2cc(C(=O)NC[C@@H]3CCCN4CCCC[C@H]34)ccc21
COC(=O)[C@H]1CCCCC1NNC(=O)[C@@H](Cc1ccccc1)c1csc2ccc(C(=N)N)cc12
Cc1ccc(N2C(=O)[C@@H]3CC[C@@H](c4ccccc4)C[C@H]3C2=O)c(C)c1
CCn1nc(C)c2ncnc(N(C)Cc3ccco3)c21
Cc1cccnc1NCCNC(=O)C[C@H]1C(=O)NCCN1CC1CCCCC1
Cn1cnc([N+](=O)[O-])c1NCC(=O)O
O=C(C(=O)N1CCN(Cc2ccccc2Br)CC1)N1CCOCC1
CCC(=O)c1ccc(Cl)cc1
CN(C)CCn1c(=O)c2nc3ccccc3nc2c2ccccc21
O=C(NCc1cccnc1)c1cccn1-c1nnc(N2CCCCCC2)s1
CCOc1cc(/C=N/NC(=O)c2nnn(-c3nonc3N)c2C)ccc1OCc1ccc(C)cc1
CN(CCCc1nccn1C)C(=O)c1ccsc1
COc1cc(Cl)c(NC(=O)c2ccccc2C(F)(F)F)cc1OC
Cc1cccc([C@@H](O)CS(C)(=O)=O)c1
COc1ccc(-c2csc(NC(=S)NC(=O)/C=C/c3ccc(C(C)C)cc3)n2)cc1OC
C[C@H](N)[C@@H]1CCCN(C(=O)c2cccc(-c3noc(C4CC4)n3)c2)C1
COc1nc(NCc2cccnc2)nc(OC)n1
C[C@H]1CN(C(=O)c2ccccc2NC(=O)c2cc(F)c(Cl)cc2Cl)C[C@@H](C)O1
Cc1ccc(NC(=O)C2CCN(C(=O)C(C)C)CC2)c(C)c1
Cc1ccc(S(=O)(=O)N(C)c2cccc(C(=O)N(C)[C@H]3CCCC[C@@H]3O)c2)cc1
Cc1c(OCC(=O)NCC(=O)N2CC[C@@]3(O)CCCC[C@@H]3C2)ccc2c3c(c(=O)oc12)CCCC3
CC(=O)O[C@H]1CC[C@]2(C)[C@H]3CC[C@]4(C)[C@@H](c5ccc(=O)oc5)[C@@H](OC(C)=O)[C@@H](O)[C@]4(O)[C@@H]3CC[C@@H]2C1
COc1cccc(CN2CCc3nc(Nc4cc(OC)ccc4OC)ncc3C2)c1
CCCCOC(=O)N1CCCc2cc(S(=O)(=O)N3CC(c4ccccc4)NC3=O)ccc21
COc1ccc(Cl)cc1NC(=O)CSc1nc2cc(C)ccc2cc1C#N
C[C@@]1(Cc2cccs2)CCCN1
COc1cc(/C=C2\SC(=O)N(Cc3ccc(Cl)cc3)C2=O)ccc1OCc1ccc(C(=O)O)o1
COc1ccc(N(CC(=O)N(Cc2ccccc2)[C@H](C)C(=O)NC(C)C)S(=O)(=O)c2ccccc2)cc1Cl
O=C(Nc1ccc(Cl)cc1)c1cc2c(cc1O)[nH]c1ccccc12
CC(C)N1CCN(C(=O)NC2CCN(c3ccc(C(N)=O)cn3)CC2)CC1
COc1ccc(NC(=O)N2CCC[C@H]2c2nc(-c3ccccc3OC)no2)c(C)c1
O=C(O)c1cc(-c2ccc(CNS(=O)(=O)c3ccc(OC(F)(F)F)cc3)cc2)n(-c2ccc(Cl)c(Cl)c2)n1
CCc1ccc(Cl)c(CC)c1NC(=O)c1ccccc1C(F)(F)F
COc1ccc(CCn2c(=O)c3cccnc3n(CC(=O)Nc3c(C)cc(C)cc3C)c2=O)cc1OC
Fc1ccccc1Cc1nc(-c2nc(C(F)(F)F)n[nH]2)c2ccccn12
Cc1ccc(C(=O)c2cc(Cl)ccc2NS(=O)(=O)c2ccc(C(C)(C)C)cc2)cn1
CC(=O)Nc1ccc(CCOCCOc2ccc(OCC(O)CNC(C)C)cc2)cc1
CC(C)(C)OC(=O)N1CCC[C@@H](CCN2CCC[C@H](O)C2)C1
O=C(O)CC(O)CCc1ccc(-c2ccc(OCc3ccccc3)cc2)cc1
CNC(=O)[C@@]12C[C@@H]1[C@@H](n1cnc3c(NCc4cccc(Cl)c4)nc(C#CCCCCc4cn(CCCCNC(C)=O)nn4)nc31)[C@H](O)[C@@H]2O
Cc1ccc2c(c1)OC(C)(C)C[C@@H]2NC(=O)c1cc2ccccc2o1
O=C(O)CCC(CP(=O)(O)CNCc1ccccc1)C(=O)O
Cc1nc2cc(NC(=O)c3ccc4c(c3)C[C@H](c3ccccc3)OC4=O)ccc2o1
CC(C)n1cnc([C@H]2CN(Cc3cnn(C)c3)C[C@]23CCN(Cc2cccnc2)C3=O)c1
COc1ccc(N2CCC(NC(=O)NC[C@@H]3CCCO3)CC2)cc1
O=C(CCCc1c[nH]c2ccccc12)N1CCCCCC1
O=C(Nc1ccc(N2CCCC2=O)cc1)[C@H]1CCCN(S(=O)(=O)CCCc2ccccc2)C1
Nc1nc(CSc2nnc(-c3cccc(Br)c3)o2)nc(Nc2ccccc2)n1
COc1cc(NC(=O)c2cc([N+](=O)[O-])ccc2NC(=O)CNCc2ccccn2)cc(OC)c1
CC(=O)c1nn(-c2ccc(S(N)(=O)=O)cc2)c(-c2ccc(Br)cc2)c1S(=O)(=O)c1ccc(C)cc1
COc1nc(C)c(C(=O)NCC[C@@H]2CCCN(C)C2)s1
C[C@@H](C(=O)NC1CCN(Cc2ccccc2)CC1)N1C(=O)c2ccccc2C1=O
CCOC(=O)c1c(-c2cc3ccc(OCC=C(C)C)cc3oc2=O)nn(-c2ccccc2)c1C(=O)OCC
COc1ccc(N2C(=O)C[C@H](Nc3ccc(CCO)cc3)C2=O)cc1
C[C@H](CO)Oc1ncccc1-c1ccc(-c2cnc(N)nc2)c(F)c1
O=C(c1ccc2cc(Oc3ccc(C(F)(F)F)cn3)ccc2n1)N1CC[C@@H](F)C1
COc1cccc(C2=NN(c3ccccc3Cl)C(c3cccc(Cl)c3)C2)c1
CCC(=O)/N=c1\sc2cccc(F)c2n1CC(=O)OC
c1ccc2c(Cc3nnc(Sc4ccnc(N5CCN(c6ccncc6)CC5)n4)n3CCCN3CCOCC3)c[nH]c2c1
COc1cc(/C=N/NC(=O)CC(=O)NC2CCCCC2)ccc1O
Cc1cc(=O)oc2cc(Oc3nc(Nc4ccc(N5C(=O)CSC5c5ccc(O)cc5O)cc4)nc(N(C)C)n3)ccc12
CC(C)(O)CN1CCc2c(cccc2NC(=O)[C@H]2CCC(=O)c3ccccc32)C1
COc1ccc(/C=c2\sc3n(c2=O)CN(c2cccc([N+](=O)[O-])c2)CN=3)cc1OC
CCOC(=O)NCCC(=O)N[C@H](C)c1ccccn1
COc1c(F)cc2c(=O)c(C(=O)N3CCC(Cc4ccccc4)CC3)cn(CCF)c2c1F
COc1cc(NS(=O)(=O)Cc2ccccc2)ccc1-c1cncnc1C
C=C1C[C@]23C4[C@@H](OC(=O)[C@@H](C)CC)[C@H]1[C@@H](O)[C@H]2[C@]12C[C@@H](OC(=O)C(C)C)C[C@]5(C)[C@H]1[C@H]([C@@H]3O)[N+](C)([C@H]5O)[C@H]42
c1ccc(CN2CCc3nnc(CN4CCCCC4)n3CC2)nc1
Cc1ccc(N(Cc2ccc(Cl)cc2Cl)C(=O)c2cc([N+](=O)[O-])cc([N+](=O)[O-])c2)cc1
O=C(NCC1CCCO1)C(c1cccs1)N(C(=O)c1ccc(-c2ccccc2)[nH]1)C1CCCC1
COc1ccc(CCNCc2ccc(OCc3ccccc3)c(OC)c2)cc1OC
C=CCN(C(=O)CNC(=O)c1ccco1)C(C(=O)NC1CCCCC1)c1cccnc1
O=C1CS/C(=N\N=C\C=C\c2ccco2)N1c1ccccc1
O=C1NC(=O)N(Cc2ccco2)C(=O)/C1=C/NNC(=O)c1ccccc1
O=C1NC(=O)N(Cc2ccc(Cl)c(Cl)c2)/C1=C/c1ccc(OCc2ccc(Cl)c(Cl)c2)cc1
Cn1cnnc1SCCOc1ccc(Cl)cc1
C[C@@H]1NC(=O)[C@H]([C@@H](C)O)NC(=O)[C@H]2CCCN(C2)C(=O)COc2ccc(cc2)C[C@@H](C(=O)NCc2cccnc2)NC1=O
CCCNC(=O)C1CCCN(c2ccc3nncn3n2)C1
CN1Cc2ccccc2[C@H](c2ccccc2)N=C1OCc1ccc(NS(C)(=O)=O)cc1
N[C@H]1CCCN(C(=O)c2cccc(CN3CCOCC3)c2)C1
CCc1cc(NCCc2nc(N)cc(=O)[nH]2)nc(N2CCOCC2)n1
COC(=O)C[C@@H]1Cc2ccccc2CN1C(=O)c1ccccc1-n1nc(C(=O)N(c2ccccc2)c2ccccc2)cc1C
CCOC[C@@H](O)CN(Cc1c(CC)nn(-c2ccccc2)c1Oc1ccccc1OC)CC1CC1
CCCCN(C)c1nnc(NC(=O)Nc2ccc(C)cc2C)s1
Cc1cc(C)c(-c2cc(C(=O)O)n(C)n2)cc1C
O=C(NCCO)[C@@H](Cc1ccccc1)N(Cc1ccc(F)cc1)C(=O)COc1ccc(S(=O)(=O)N2CCOCC2)cc1
CO/N=C(/C(=O)N[C@@H]1C(=O)N2C(C(=O)O)=C(CSc3nc(C)c(CC(=O)O)s3)CS[C@H]12)c1csc(N)n1
C[C@H](OC(=O)CC[C@@H]1NC(=O)NC1=O)c1ccc(Cl)cc1Cl
O=[N+]([O-])c1ccc(/N=N\C(Cc2ccccc2)=N/Nc2ccccc2)cc1
C[C@@H](C(=O)Nc1c(F)c(F)c(F)c(F)c1F)n1nc(-c2ccccc2)c2cc(Cl)ccc21
COc1ccc(NC(=O)N[C@@H]2CC(=O)N(c3ccc(Cl)cc3)C2)cc1
C[C@H](C(=O)N(Cc1ccc(C2CCCCC2)cc1)c1ccc(C(=O)NO)cc1)N(C)S(=O)(=O)c1c(F)c(F)c(F)c(F)c1F
C[C@@H]1CC[C@H](C(N)=O)CN1C(=O)c1csc(-c2ccccc2F)n1
CC1=NN(c2ccccc2)C(=S)/C1=C/Nc1ccccc1Cl
NCCCCc1cccnc1
Cc1cccc(CCCNC(=O)c2ccc(CS(=O)(=O)N3CCCC3)cc2)c1
CC[C@@H](C)NC(=O)[C@@H](CC)N(CCc1ccccc1)C(=O)CN(c1ccc(F)cc1)S(=O)(=O)c1ccc(OC)cc1
COc1c(Br)ccc(Cl)c1C(C)=O
CC(C)C(=O)N1CC[C@@H](NC(=O)N2CCC[C@@H]2C2CCC2)C1
N#Cc1cccc(NC(=O)CCN2C(=O)C3CCCCC3C2=O)c1
Cc1ccc(CCC(=O)NNc2c(Cl)cncc2Cl)cc1
CC(C)N1C[C@@H]([C@H](O)[C@H](CC2CCCCC2)NC(=O)[C@H](Cc2c[nH]cn2)NC(=O)[C@H](Cc2ccccc2)NC(=O)OC(C)(C)C)OC1=O
CCc1n[n+]([O-])c2cc(OCCCO)ccc2[n+]1[O-]
CCOc1cc(CNc2ccc(C)c(C)c2)ccc1OCC(=O)Nc1cccc(C)c1C
CC(C)(S)CN1CCCN(CC(C)(C)S)CC1
COc1ccc(C(CCC(=O)NO)P(=O)(O)O)cc1
CN(CCCc1ccc(Cl)cc1)c1nc(NCCc2ccc(O)cc2)nc(N2CCN(CC(=O)c3ccccc3)CC2)n1
COc1ccc([C@@H](C)NC(=O)N[C@H](C)Cn2cccn2)c(OC)c1
NC(=O)C1=CN(Cc2ccc(Cl)cc2)CC[C@H]1C(F)(F)F
O=C(c1cc2ccccc2o1)N1CC[C@H](S(=O)(=O)c2ccc(Cl)cc2)C1
CCCCNC(=O)C1CCN(C(=O)N2CC(C)Oc3ccc(Cl)cc32)CC1
Oc1c(C(c2ccccn2)N2CCCCC2)cc(Cl)c2cccnc12
CN(C)S(=O)(=O)N(C)Cc1ccco1
CC(C)CNC(=O)[C@@H](C)N(Cc1ccc(F)cc1)C(=O)CCCN(c1ccccc1F)S(C)(=O)=O
Cc1cc(C)c2[nH]c(C)c(CC(=O)N(C)Cc3ccc4nccnc4c3)c2c1
N#Cc1c(N2CCN(C(=O)CN3CCCC3)CC2)nc(-c2ccccc2)c2c1CCC2
CSc1ncc(Cl)c(C(=O)Nc2sc3c(c2C(=O)NC[C@H]2CCCO2)CCC3)n1
COC(=O)c1ccc(NC(=O)C(C)Sc2nc(=O)cc(N)n2CCc2ccccc2)cc1
COc1ccccc1Nc1ncnc2c1nc1n2CCCCC1
COC(=O)c1ccccc1NC(=O)CCc1nc(-c2ccc(C(C)C)cc2)no1
C=CCCC1CCCCNC1=S
Cc1cc(=O)oc2c3c(cc(OCC(=O)NCCN4CCOCC4)c12)OC(C)(C)CC3
Cc1nc(CNC(=O)NC[C@@H](Cc2ccccc2)N(C)C)sc1C
CCNC(=O)N[C@@H](Cc1ccccc1)C(=O)N[C@H](C(=O)N[C@@H](C)C(=O)N[C@@H](CC(C)C)C(N)=O)C(C)C
Oc1ccccc1C(c1ccccc1)N1CCc2ccccc21
N#Cc1ccc2[nH]c3ncnc(-c4cccc(N)c4)c3c2c1
CCOC(=O)c1ccc(N(CC(=O)NCC2CCCO2)C(=O)CCC(=O)Nc2cc(C)on2)cc1
O=C1C=C(c2cc3ccccc3s2)C[C@@H](c2ccc(F)cc2)C1
Cc1nc(CC(C)C)c2c(N3CCc4ncccc4C3)ncnn12
O=C1[C@@H]2C[C@@H](CN2Cc2ccc(F)c(F)c2)N1c1ccccc1Cl
O=C(CSc1nncn1-c1cccc(Cl)c1)NC[C@@H]1COc2ccccc2O1
c1ccc(/N=c2/scc(-c3ccc(Oc4ccccc4)cc3)n2-c2ccccc2)cc1
COC(=O)NCc1ccc(C(=O)Nc2cc(-c3cccs3)ccc2N)cc1
CS(=O)(=O)Nc1ccc2c(c1)S(=O)(=O)N=C(C1=C(O)[C@H]3[C@H]([C@H]4CC[C@@H]3C4)N(Cc3ccc(Cl)cc3)C1=O)N2
Cc1ccccc1OC1c2ccccc2CC1(O)CNCCO
Clc1ccc([C@H]2CNCCO2)cc1Cl
Cn1cc(CN2CCC3(CC2)CCN(C(=O)c2ccsc2)CC3)cn1
CC1(c2ccc(O)cc2)NNC(=O)CO1
CC(C)CN1CCC(CNC(=O)N(C)Cc2ccc3nsnc3c2)CC1
CN1C[C@@H]2C[C@H]1CN2c1ccc(-c2cccnc2)cc1
O=C(C1CCN(Cc2cnn(-c3ccccc3)c2-n2cccc2)CC1)N1CCN(c2ccccc2)CC1
Cc1ccc(O)c(C(=O)N[C@H]2CC[S@](=O)C2)c1
C[C@H]1O[C@@H](O)C[C@@H](O)[C@@H]1O
O=C1c2ccccc2C(=O)N1c1ccc(-c2nccs2)cc1
CC(=O)CC/C=C(/C)CC/C=C(\C)CC/C=C(\C)CCC=C(C)C
COc1ccc(CN2CCC(Sc3ncccn3)CC2)cc1
Cc1ccc(S(=O)(=O)NCCNC(=O)C2CC2)cc1
CCCC[n+]1ccccc1C
CC(=O)Nc1ccc(N2CCNCC2)c([N+](=O)[O-])c1
C=CCOc1nc(C(C)(O)c2ccc(OC)cc2)c2ccccc2n1
Cc1cc(C)c(OCCNC2CCC(CC(=O)O)CC2)c(C)c1
Cc1cc(C(=O)CSc2nnnn2C)c(C)n1-c1ccc2c(c1)OCCO2
CCOC(=O)Nc1ccc2c(c1)N(C(=O)N1CCN(C)CC1)c1ccccc1S2
CCc1n[nH]c(=O)c(-c2nc(C3CCCC3)cs2)c1CC
CC[C@@H](CN1CCCC1)NC(=O)Nc1ccc(OC)nc1
Cn1c(SCC(=O)N2N=C3/C(=C/c4ccccc4)CCC[C@@H]3[C@H]2c2ccccc2)nnc1C1CC1
Cc1cccc(N2CCN(C(=O)CCNC(=O)c3ccccc3)CC2)c1C
COC(=O)CCCNC(=O)c1cc(Cl)cc(F)c1N
O=C(NCCCN1CCCCCC1)C1CC(=O)N(C2CCCC2)C1
Cc1nnc2n1CCN(Cc1csc(-c3ccc(F)cc3)n1)C2
CCN(CC)C(=O)COC(=O)CCNC(=O)[C@H](Cc1ccc(-c2ccccc2)cc1)NCP(=O)(Oc1ccccc1)Oc1ccccc1
C=C(C)[C@H]1CC/C(C)=C/CC[C@@](C)(Cl)[C@H](O)CC/C(COC(C)=O)=C\[C@@H]1OC(C)=O
NC(=O)CCc1ccc(-c2ccc(Br)cc2Cl)o1
CCOc1ccc(-c2csc3ncn(CCOc4ccccc4)c(=O)c23)cc1
CSc1cccc(NC(=O)[C@@H]2CC(O)=Nc3nncn32)c1
COc1cc([C@H]2c3cc4c(cc3O[C@H](NN)[C@@H]2C)OCO4)cc(OC)c1OC
CC[C@@H](C(=O)NC)N(Cc1c(Cl)cccc1Cl)C(=O)CN(c1ccc(Cl)c(Cl)c1)S(C)(=O)=O
COc1cccc(CN2CCC[C@@](O)(CN(C)C)CC2)c1OC
COc1ccc(-c2nc3ccccc3s2)cc1NC(=S)NC(=O)C(C)(C)C
CC(C)C[C@H](N[C@H]1CC[C@H](n2cc(-c3ccc(Oc4ccccc4)cc3)c3c(N)ncnc32)CC1)C(N)=O
OCC1(Cc2ccccc2)CCCN(Cc2cnn(-c3ccccc3)c2)C1
COc1cccc(-c2ccc(NC(=O)C3CCCN(Cc4ccccn4)C3)cc2)c1
CSc1nc2n(n1)[C@H](c1ccc(C)cc1)C1=C(N2)c2cc(C)ccc2O[C@H]1c1ccc(C)cc1
CCC[C@@H](c1nnnn1Cc1ccccc1)N1CCN(c2cccc(C)c2C)CC1
OCc1c[nH]c(C2CCCC2)n1
O=C(NCCN1CCC(c2ccncc2)CC1)c1cccc(Nc2nccc(Nc3ccc(Oc4ccccc4)cc3)n2)c1
CCOC(=O)c1ccc(OC)c(OC)c1Cl
COc1cc(NC(=O)c2ccc(-c3cccc(Cl)c3Cl)o2)ccc1-c1ccc(CO)o1
Cn1ncc(N2CCN(C(=O)CCCc3cccs3)CC2)cc1=O
CC(C)c1cccc(C(C)C)c1OC(=O)NC(=O)SCCN1CCOCC1
CCCc1sc2nc(SCC#N)n(-c3ccc(OC)cc3)c(=O)c2c1C
CCCn1nc(-c2ccc(C)cc2)c2c1/C(=C/c1ccc(C)cc1)CS(=O)(=O)C2
O=C1C[C@H](c2ccccc2)N(C(=O)CSc2ccccc2Cl)c2ccccc2N1
CCOc1ccc(-n2c(C)cc(/C=C3/C(=O)NN(c4ccccc4)C3=O)c2C)cc1
O=c1[nH]c(-c2ccc(C(F)(F)F)cc2)nc2ncccc12
CNc1nc(Nc2ccccc2)c2sc(-c3ccccc3)cc2n1
OC[C@H]1CCN(c2ccc(F)cc2)C1
Cc1cc(C)n(-c2nc(NC(C)(C)C)nc(N3CCOCC3)n2)n1
Cc1ccc(C(=O)/C=C/c2ccccc2Cl)cc1
C[n+]1cscc1C(C)(C)OC(=O)c1ccccc1
COc1ccc(OC)c([C@@H](C)NC(=O)[C@@H](C)Oc2ccc(Br)cc2)c1
O=C(NCCCCc1ccccc1)c1cccc(NC(=O)C2CC2)c1
O=C(COCc1ccccc1)NC[C@@H]1CCCN(c2cnccn2)C1
Cc1c(Cl)cccc1NC(=O)CSc1nnc([C@H](NC(=O)c2cccc([N+](=O)[O-])c2)C(C)C)n1C
N[C@H]1CCC[C@H]1C(F)(F)F
O=C(/N=C1\CCCCCN1)Nc1c(Cl)cccc1Cl
N#Cc1ccc(Cn2cncc2CN(C(=O)c2cccc(F)c2)c2ccc(N3CCN(C(=O)c4ccc(Cl)s4)CC3)cc2)cc1
NCCOc1c(-c2ccc(F)c(F)c2)[nH]c(=O)c2cc(F)ccc12
CC(=O)N[C@H](COCCC1CC1)C(=O)NCc1ccccc1
COC(=O)c1cc(Cl)c(NC(=O)C2CCN(C(=O)C3CC3)CC2)cc1OC
S=C(Nc1ccccc1Cl)NC1CCCC1
CC[C@@H](C(=O)NC(C)(C)C)N(Cc1ccc(C)cc1)C(=O)CCCN(c1ccc(Cl)cc1)S(C)(=O)=O
CCc1ccc([C@@H](C)NC(=O)c2ccc(NS(=O)(=O)c3ccccc3)c(C)c2)cc1
O[C@@H]1CCCC[C@H]1N1CCC(N2CCCCC2)CC1
O[C@@H]1CCCN(c2cc(CN[C@H](c3ccccc3F)[C@H]3C[C@H]4CC[C@H]3C4)ccn2)C1
O=C1C=C[C@]23C(c4ccccc4)=CC(=O)N2[C@H](c2ccc(Cl)cc2)C(=O)N[C@@H]3C1
CC(C)Oc1ccc(Nc2nc(=O)n(CCC(=O)NCCO)c(=O)n2Cc2ccc(Cl)cc2)cc1F
O=[N+]([O-])c1ccccc1S(=O)(=O)N1c2ccccc2O[C@@H]1c1ccc(Cl)c(Cl)c1
CO[C@@H]1C[C@@H](NC2CCN([C@H](C)c3ccncc3)CC2)C12CCC2
C=C(C=O)[C@@H]1CC[C@]2(C)CC[C@]3(C)[C@H](CC[C@@H]4[C@@]5(C)CCC(=O)C(C)(C)[C@@H]5CC[C@]43C)[C@@H]12
CC1(C)CCc2c(cc(OCC(=O)N[C@@H](Cc3ccccc3)C(=O)O)c3c4c(c(=O)oc23)CCC4)O1
CC[C@H](C)CN(CC(=O)N1CCc2sccc2[C@H]1COc1ccc(Cl)cc1)C(=O)Cc1ccccc1
C=CCN1CCN(/C(=N\O)c2cccnc2Oc2ccccc2OC(C)C)CC1
O=C(O)C(c1ccccc1)c1ccccc1
CC(OC(=O)CCC(=O)CN)OC(=O)C(C)(C)C
CC(C)C[C@@H]1NC(=O)[C@H](Cc2ccccc2)NC(=O)[C@H](CC(C)C)NC(=O)[C@H](C(C)C)NC(=O)[C@H](CCCCN)NC1=O
O=C(NN1C(=O)/C(=C/c2cccc3cccnc23)SC1=S)c1cccnc1
CC(C)C[C@@](C)(NC(=O)c1cc(C(N)=O)c[nH]1)c1cccc(Br)c1
Cn1nc(C(=O)OCC(=O)c2ccc[nH]2)c2ccccc2c1=O
O=C(c1ccc(Cl)cc1OC1CCN(Cc2cc(F)cc(F)c2)CC1)N1CCCCC1
O=c1cc(COc2ccccc2)[nH]c2[nH]n(-c3nc4ccccc4s3)c(=O)c12
CC(C)(C)CNC(=O)C[C@H](NC(=O)N1CCC(C(=O)NCc2nccs2)CC1)C(=O)N[C@@H](CCc1ccccc1)C(=O)NCc1ccccc1Cl
CCOc1ccc(C(=O)Nc2cnn(Cc3ccc(Cl)c(Cl)c3)c2)cc1
Cc1nc(COc2cccc(Cl)c2)sc1C(=O)/C=C/N(C)C
[C-]#[N+]C(F)Oc1cc(F)ccc1-c1nccc2cc(S(=O)(=O)Nc3nccs3)ccc12
COc1ccc(C)cc1NC(=O)N1CCC[C@@H]1c1cc(C(C)C)on1
O=C1C=C(c2ccc(C(=O)O)cc2)C[C@@H](c2ccc(Cl)cc2)C1
Cc1n[nH]c([C@H]2CN(C(=O)[C@H](C)Cc3ccccc3Cl)CCO2)n1
CS(=O)(=O)N1Cc2ccccc2C[C@@H]1C(=O)N1CCC[C@H](c2nc3ccccc3s2)C1
CCc1cc(Nc2nc(NCc3ccccn3)ncc2Br)n[nH]1
CCn1c(CNC(=O)Cc2ccccc2)nnc1SCC(=O)N[C@H](C)c1ccccc1
CS[C@H]1CN(C(=O)c2cc(C)n(-c3ccccc3)n2)C[C@@H]1N(C)C
ClC(Cl)(Cl)c1nccc2ccccc12
COc1cc(CN(C[C@H]2CC[C@H](C(=O)O)CC2)C2CCc3cc(Cl)c(C)cc32)ccc1OCCN1C(=O)CCC1=O
CNCCC(c1ccc2cc(Cl)ccc2c1)n1ncnn1
Cc1ccccc1C1(NC(=O)N2CCC(F)(F)CC2)CC1
CC1CC1CC(=O)O
C[C@]12CC[C@@H](O)C[C@H]1CC[C@H]1[C@@H]3CC[C@](C)(O)[C@@]3(C)CC[C@H]12
Cc1cc(C)c(S(=O)(=O)N(C)Cc2ccccc2)cc1N(C)S(=O)(=O)c1ccccc1
Cc1cnc(CN2CCc3cc(Br)ccc3C2)o1
COc1cccc(/C=C/C(=O)CCN2CCOCC2)c1
Cc1ccc(-n2cc(C(=O)c3ccccc3)c(-c3ccc([N+](=O)[O-])s3)n2)cc1
Clc1cccc([C@@H]2C[C@@H](c3ccc(Br)cc3)Nc3nc4ccccc4n32)c1
O=C(N=C1C=CC(=C(O)Nc2ccc(F)c(Cl)c2)C=C1)N[C@H]1CCS(=O)(=O)C1
O=C(Nc1ccccn1)c1ccc2[nH]c(-c3ccc(NC(=O)C45CC6CC(C4)C(=O)C(C6)C5)cc3)nc2c1
COc1cccc(OC)c1C1CCCC(=O)N1Cc1ccc2c(c1)nnn2C
COC(=O)c1sccc1NC(=O)Cc1cccc2cnccc12
CC(C)[C@H](NP(=O)(OC[C@H]1O[C@@H](n2cnc3c(=O)[nH]c(N)nc32)[C@](C)(O)[C@@H]1O)Oc1cccc2ccccc12)C(=O)OCc1cccc(Cl)c1
CC[C@H](NC(=O)[C@@H](C)N(c1ccc(Cl)cc1)S(C)(=O)=O)c1ccc(OC)c(C)c1
O[C@@H]1COC(n2c(Cc3ccccc3S)nc3cc(Cl)c(Cl)cc32)[C@@H]1O
O=C([C@@H]1CSCN1C(=O)CC1Cc2ccccc2C1)N1CCCC1
Clc1ccc(Cc2nc3cc(Cl)cc(Br)c3[nH]2)cc1
CC1(C)C[C@@H]1C(=O)N1CCN(CC(=O)O)CC1
Cc1cc(C)n(CCC(=O)OCc2cc(=O)n3c(C)csc3n2)n1
CC#CCOc1ccc(S(=O)(=O)N2Cc3ccccc3N(C(C)=O)CC2C(=O)NO)cc1
O=C(/C=C\c1ccc(F)cc1)N1CCN(C(=O)CCC2CCCC2)CC1
COc1cccc(NC(=S)NCc2ccc3[nH]c(C)cc3c2)c1
C[C@@]1(C(=O)N[C@@H](Cc2ccccc2)C(=O)O)CCCN1S(=O)(=O)c1cc(Cl)cc(Cl)c1
CCN(CC)S(=O)(=O)c1cccc(NC(=O)COc2ccc(C(C)(C)C)cc2)c1
C/C(=N\Nc1nnc2c(n1)[nH]c1ccccc12)c1ccc(C)o1
CCOC(=O)N1CCN(C(=O)c2cc3ccccc3n2C)CC1
CCC12c3ccccc3C(c3ccccc31)[C@H]1C(=O)N(c3cc([N+](=O)[O-])ccc3C)C(=O)[C@H]12
Cc1ccc(-c2nnc(CN(C[C@@H]3COc4ccccc4O3)C(C)C)o2)n1C
CC(C)Oc1ncc2c(n1)[nH]c1ccc([C@H]3CNCCO3)cc12
CC1(C)C2CCC1(C)C(OC(=O)CCn1ccnc1)C2
Cc1ccc(NC(=O)[C@H]2CCC(=O)N2)cc1Cl
O=C(Nc1ccc2c(c1)OCO2)[C@H]1CCCN1C1=NS(=O)(=O)c2ccccc21
COc1ccc2cc(CN3CCC[C@H](OC)C3)c(-c3cccc(C)c3)nc2c1
Cc1ccc(S(=O)(=O)N(CC(=O)N(Cc2ccc(Cl)cc2)[C@@H](C)C(=O)NC(C)C)c2ccc(Cl)cc2C)cc1
CCn1cnc2c(N)nc(Cl)nc21
COC1(CC(C)C)CCN(c2ccc(C(=O)NS(=O)(=O)c3ccc(N[C@H](CCN(C)C)CSc4ccccc4)c([N+](=O)[O-])c3)cc2)CC1
CCC(C)NC(c1ccccc1)(c1ccccc1)c1ccc2ccccc2c1
CCn1nc(CC(C)C)cc1C(=O)N1CC(N2CCCC[C@H]2C)C1
N#Cc1cccc(CN2C(=O)N(c3ccc(F)cc3)S(=O)(=O)c3ccccc32)c1
CN[C@H](Cc1c(C)cc(O)cc1C)C(=O)N[C@H](C)C(=O)NCCCc1ccccc1
CCOc1cc(/C=C2/SC(=S)N(Cc3ccccc3)C2=O)cc(Cl)c1OCCCOc1cccc(C)c1C
COc1ccccc1/N=C1/NC(=O)/C(=C\c2cccnc2)S1
C/C1=C\C[C@@]2(C)C(=O)C=C(C(C)C)[C@@H]2CC[C@]2(C)O[C@H]2CC1
CCOC(=O)C1CCCN(C(=O)c2ccc(C(=O)c3ccccc3)cc2)C1
CCC(=O)N(Cc1cccc(C)c1)[C@H](CC)C(=O)NC1CCCCC1
CC(=O)Nc1ccc(NC(=O)N2CCC[C@@H](C(F)(F)F)C2)cc1
COc1ccc(Nc2ncc(-c3ccnnc3)cc2-c2nc(C)nc(N)n2)cn1
CC(C)(C)c1ccc(/C(=C/C(=O)N2CCOCC2)c2ccnc(Cl)c2)cc1
CC(C)(C)[C@@H]1CCc2nc(N)sc2C1
CC(OC(=O)Cn1cnc2c1c(=O)n(C)c(=O)n2C)C(=O)NC(C)c1ccc(Cl)cc1Cl
C[C@H]1C[C@@H](C)CN(S(=O)(=O)N(C)Cc2ccccn2)C1
N#CCC1(n2cc(-c3ncnc4[nH]ccc34)cn2)CN(C2CCN(C(=O)c3cc4ccc(C(F)(F)F)cc4s3)CC2)C1
Nc1c(S(=O)(=O)O)cc(Nc2cccc3ccccc23)c2c1C(=O)c1ccccc1C2=O
Cc1nn(C)c(C)c1CN(C[C@]1(O)CCCN2CCCC[C@@H]21)C(C)C
CC(C)c1nccn1CC(=O)c1ccc(Br)cc1
CC(=O)N1N=C(c2ccccc2)OC1c1ccccc1
Cn1c(=O)c2c(c3ccccc31)OC(=O)C[C@H]2c1ccccc1
Cc1ccc(C)c(S(=O)(=O)N2CCC[C@@H](C(=O)Nc3ccc(F)cc3)C2)c1
CCOC(=O)c1ccc(NC(=S)NC(=O)C2CCCC2)cc1
CC(C)[C@H](C(=O)NCc1cc[nH]n1)N1C[C@@H](C)O[C@H](C)C1
CC(NC(=O)c1cc(F)ccc1F)c1nnc2n1CCN(Cc1ccc(-c3ccccc3)cc1)CC2
Cc1noc(C)c1CN1CCN(Cc2cc(=O)n(C)c(=O)n2C)CC1
COc1ccc(NC(=O)CN(C)C(=O)c2ccc3[nH]c4c(c3c2)CC(C)CC4)cc1
COc1ccc(-c2nnc(NCc3nc4ccccc4c(=O)[nH]3)s2)cc1
CCCN1CCN(S(=O)(=O)c2ccc3c(c2)CCN3C(=O)CCC(=O)N2CCOCC2)CC1
CCOC(=O)[C@H]1C[C@H](n2ccc(=O)n(C(=O)c3ccccc3)c2=O)C[C@H]1C(=O)OCC
COc1ccc2cc3[n+](cc2c1OCCCNC1CCCCC1)CCc1cc2c(cc1-3)OCO2
Cc1cccc(-n2ncc(SCc3ccccc3)c(SCc3ccccc3)c2=O)c1
CC(=O)Oc1c(-c2ccc(NC(=O)c3ccccc3)cc2)c(-c2ccccc2F)nn1-c1ccc(F)cc1
Cc1cc(N2CC[C@H](NS(=O)(=O)c3ccccc3F)C2=O)ccc1F
CCOC(Cc1ccc(OCCN2CC=C(c3ccc(Cl)cc3)CC2)cc1)C(=O)O
C[C@H]1CN(c2ccccc2NC(=O)c2[nH]nc(C3CC3)c2Br)C[C@H](C)O1
CC(C)C12OC3(c4ccccc4)OC1[C@@H]1[C@@H]4O[C@]4(CO)[C@@H](O)[C@]4(O)C(=O)C=C[C@@]4(C)C1(O3)[C@H](C)[C@H]2OC(=O)c1ccccc1
O=C(CN(C(=O)c1ccccc1Cl)N1C(=O)[C@H]2CC=CC[C@H]2C1=O)c1ccc(OC(=O)c2ccco2)cc1
O=C(NCCCCNc1ccnc2cc(Cl)ccc12)c1ccc(Br)cc1
COC(=O)[C@H](CCCCNC(=O)Nc1ccc(OC)cc1)NC(=O)CCCc1nc2ccccc2c(=O)[nH]1
CS(=O)(=O)OCC(=O)Nc1cccc(-c2cnc3ccccc3n2)c1
CC(C)C1CN(C(=O)Nc2ccc(Cl)cc2)CCN1/C(=N/C#N)Nc1cccc2[nH]ccc12
Cc1ccc(Cl)c(OCC(=O)Nc2sc(C)c(C)c2C#N)c1
CC(=O)Nc1ccc(OC(O)C(Cl)(Cl)Cl)cc1
N#Cc1c(O)nc(-c2cccnc2)nc1-c1ccccc1
O=C(NC[C@@H]1CCCO1)c1ccc2nc(CCc3ccccc3)oc2c1
CC(C)c1nc([C@@H]2CCCN(C(=O)c3ccc(C#N)cn3)C2)no1
CC(=O)C1=COC[C@H]2[C@@H]3CC(=O)[C@H](C[C@@H]12)N3C
CCN(CC)Cc1c(O)ccc2c(=O)c(-c3ccccc3OC)coc12
CC1(C)[C@@H]2CC[C@]1(C)C(=O)[C@@H]2S(=O)(=O)Nc1ccccc1
Nc1ccc2[nH]c3nccc(NCc4cccc(Cl)c4)c3c2c1
C[C@@H](CCc1ccccc1)NC(=O)CN(C)S(=O)(=O)c1ccc(Br)cc1
CSC1=NCCN1C(=O)C(C)Oc1ccccc1
CCn1c(SCC(=O)N2CCC[C@H](C)C2)nc2c1c(=O)n(C)c(=O)n2C
O=S(=O)(Nc1cccnc1)c1cccs1
N=C1CSC2=NC3=C(CCC/C3=C\c3ccccc3)C(c3ccccc3)N12
OC[C@@H]1C[C@H](O)CO1
CNC(=O)CN1CCC[C@@H]1c1ccccc1Br
O=C(O)Cc1cc(Cl)c2c(c1)CCC(c1ccccc1)N2
CCc1nnc2n1CCN(C(=O)CCc1ccc3c(c1)OCO3)C2
CC(C)(C)N1CSC(=S)N(Cc2ccco2)C1
CC(C)C1C(=O)N(S(C)(=O)=O)C2CCN(C(=O)c3ccc(CNC4CC4)nc3)C12
Cc1c(Cl)cccc1NC(=O)CCc1ccc(S(=O)(=O)N2CCCc3ccccc32)cc1
N/C(=N\O)c1ccc2oc(/C=C/c3cc4cc(/C(N)=N/O)ccc4o3)cc2c1
Cc1ccc(Cl)cc1NC(=O)CSc1nnc(-c2ccc(Br)cc2)o1
COc1cccc(N2CCNC(=O)N2)c1
Cc1cccc(N2C(S)=NC(=Nc3c(C)cccc3C)C23CCOC(C)(C)C3)c1
CC(C)N(CCCNC(=O)c1ccc2c(c1)CCC2)S(C)(=O)=O
O=C(NCCc1cccs1)c1ccccc1-c1ncc(-c2ccccc2)o1
CN(C)CC1C[C@@H]2c3ccccc3OCc3ccccc3[C@H]2O1
CN(CC1CNc2nc(N)[nH]c(=O)c2N1Cc1c[nH]c(=O)[nH]c1=O)c1ccc(C(=O)NC(CCC(=O)O)C(=O)O)cc1
COc1ccc(CCc2nc3cc(-c4c(C)noc4C)ccc3n2CCN2CCOCC2)cc1
C#CCCCO/N=C1\[C@@H]2CCn3c(=O)n(Cc4cc5c(cc4Cl)OCO5)c(=O)n3[C@H]2[C@H](O)[C@H]2O[C@H]12
Cn1ccc(C(=O)N2C[C@@H](c3cccnc3)[C@]3(C2)OCCN(Cc2ccc(F)cc2)C3=O)n1
CC(=O)N1N=C(c2cccc(Oc3cc(O/N=[N+](\[O-])N4CCOCC4)c([N+](=O)[O-])cc3[N+](=O)[O-])c2)CC1c1ccc(C)cc1
CC[C@H](C)NC(=O)[C@@H](C)N(Cc1cccc(Br)c1)C(=O)CCSc1ccc(C)cc1
O=C1CCN(S(=O)(=O)c2cc(F)cc(Cl)c2)[C@@H]2CCC[C@H]12
CCN(Cc1ccccc1)S(=O)(=O)N(C)C[C@H]1CCN(C)C1
C=CC(=O)NC[C@H]1CN(c2ccc3c(c2)OC[C@@H]2CCCN32)C(=O)O1
CC(C)Cn1c(N)c(C(=O)COC(=O)c2cccnc2Cl)c(=O)n(C)c1=O
CC[C@H](Oc1cccc(C)c1)C(=O)NCc1ccc(F)cc1
Cc1ccc(CC(=O)N2CCC[C@@]3(CCC(=O)N(CCO)C3)C2)cc1
COCCCNC(=O)c1ccccc1NC(=O)COc1cc(C)cc(C)c1
Cc1ccc2[nH]c(=O)c(C3=NN(C(=O)C(C)(C)C)[C@H](c4cccc(Br)c4)C3)c(-c3ccccc3)c2c1
Cn1c(-c2cccs2)[n+](C)c2ccccc21
CC(C)c1ccc(C(N)c2cccs2)cc1
COC[C@@H](C)NC(=O)c1cc(C)nc2ccc(C)cc12
CC(=O)Nc1nc(N[C@@H](Cc2ccccc2)C(=O)OC(C)(C)C)c2nc[nH]c2n1
Cc1cc(C)cc(-c2cc3cc(C(C)(C)C(=O)NC(C)(C)C)ccc3n2C(=O)OC(C)(C)C)c1
Cc1ccc(-c2noc(-c3cccnc3N3CCC(C(=O)NCc4ccccc4C)CC3)n2)cc1
CCCS(=O)(=O)N1CCC[C@@H]1C(=O)Nc1ccc(OC)c(OC(F)F)c1
CC(C)=CCC[C@]1(C)C=Cc2c(cc(C)n(Cc3ccccc3)c2=O)O1
Cc1nc(C)c(-c2ccc([C@H]3CC[C@@H](CC(=O)O)CC3)cc2)nc1C(N)=O
Cc1c(/C=C/c2ccccn2)c(=O)ccn1Cc1ccccc1
Cc1cc(Br)c(Oc2nc(Nc3ccc(C#N)cc3)nc3ccccc23)c(Br)c1
COc1cc2c(Nc3c(F)ccc(O)c3C)ncnc2cc1OCC1CCN(C)CC1
Cc1ccc2nc(CCC(=O)N[C@H](C)Cn3cncn3)[nH]c2c1C
CCn1nc(C)cc1C(=O)Nc1cccc(C(=O)NCC(C)C)c1
COC[C@H](C)C(=O)N1CCC[C@@H]1[C@H]1CCCN1C
CCc1cc2c(cc1OS(N)(=O)=O)CC[C@@H]1[C@@H]2CC[C@]2(C)[C@@H](COC)CC[C@@H]12
CCOc1ccc(N=c2scc(-c3ccc(C)c(C)c3)n2CC)cc1
CNCCCNc1nc(-c2ccc(N(C)C)cc2)cc2ncccc12
CSc1ncccc1C(=O)N(C)[C@@H](C)Cc1ccccn1
COc1cc(C(=N)N)ccc1OCCN(CCOc1ccc(C(=N)N)cc1OC)S(=O)(=O)c1ccccc1
NS(=O)(=O)c1ccc(Nc2nc(-c3cccc4c3oc3ccccc34)c3nc[nH]c3n2)cc1
Cc1cc(-c2cnc(N(C)C)nc2[C@H]2CC[C@H](CNC(=O)CC[C@H]3CCCO3)CC2)on1
Cc1nn(-c2ccccc2)c2sc(C(=O)NCc3nnc4n3CCCCC4)cc12
Cc1nc2ccccc2c(=O)n1NC(=O)/C=C/c1ccc(Br)cc1
c1ccc(CNC2CCCCCC2)cc1
Nc1ccc(Oc2ncccc2-c2ccncn2)cc1
CC[C@H](c1nnnn1C1CCCC1)N(Cc1ccccc1)Cc1cc2cc(OC)ccc2[nH]c1=O
O=C(CCc1ccc(S(=O)(=O)NCc2ccccc2)cc1)Nc1cccc(Cl)c1
CC(C)N1CCN=C1CN1CCCCSc2ccc(Cl)cc21
CCOc1ccccc1C=NNC(=O)c1nnn(-c2nonc2N)c1N1CCCC1
C=CCOc1cccc(/C=c2\sc3n(c2=O)[C@H](c2ccc(C)cc2)C(C(=O)OCC)=C(C)N=3)c1
CC(=O)N[C@@H](Cc1ccc2ccccc2c1)C(=O)N[C@H](Cc1ccc(Cl)cc1)C(=O)N[C@H](Cc1ccccn1)C(=O)N[C@@H](C)C(=O)N[C@H](CCCN=C(N)N)C(=O)N1CCC[C@@H]1C(=O)N[C@@H](C)C(N)=O
COc1cc2c(cc1O)CC1c3c(cc(O)c(OC)c3-2)CCN1C
Cn1cc(-c2nc(CN3CCCCC3Cn3cncn3)cs2)cn1
Cc1ncccc1C(=O)N1CCC[C@@H](C(=O)NCc2ccccc2)CCNC(=O)CC1
CCCCCCCCC[C@H](O)[C@@H](C)NC(C)=O
Nc1cnc2c(c1)OCCO2
Fc1cccc(/C=N/c2ccc(Oc3ccc(/N=C/c4cccc(F)c4)cc3)cc2)c1
COc1ccc(S(=O)(=O)Nc2ccc(OC)c(Cl)c2)cc1
COC(=O)c1c(OCc2ccsc2)cc(=O)n2c1CCN(C(=O)[C@H]1COc3ccccc3C1)CC2
COc1ccc(CNC(=O)c2cnn(-c3ccc(F)cc3)c2-n2cccc2)cc1
CN(C)CCN1CCN(C2=Nc3ccccc3C(CC(=O)OCc3ccccc3)N2c2ccc(-c3ccccc3)cc2)CC1
NC(C(=O)NCc1ccccc1)c1nccc2ccccc12
COc1ccc(CN2C(=O)[C@H]3CCCC[C@H]3C2=O)cc1S(=O)(=O)Nc1ccc(C)c(F)c1
CCc1[nH]c2ccccc2c1C(=N/c1nc(-c2c(-c3ccc(Cl)cc3)[nH]c3ccccc23)cs1)/N=N/c1ccc(OC)cc1
CCOc1cc(C=O)ccc1OCCCN1CCC[C@H](C)C1
CCOC(OCC)c1cccc(/C=C2\CC/C(=C\c3cccc(C(OCC)OCC)c3)C2=O)c1
COCC[C@H]1CCCN(C(=O)Cc2ccc(N(C)C)cc2)C1
CN1CCN(c2cc(CNC(=O)c3ccsc3)ccn2)CC1
C=CCN1C(=O)CC[C@@H]2[C@H]1CCN2Cc1ccc(F)cc1
CCCn1c(NC(=O)CN2C(=O)[C@H]3CCCC[C@H]3C2=O)nc2ccccc21
O=c1cc(NNCc2ccccc2)[nH]c(=O)[nH]1
Cn1cncc1CN1CCN2C(=O)OC3(CN(C(=O)C4CC4)C3)[C@H]2C1
Cc1cc2oc(C(=O)Nc3nc4c(s3)C[C@@H](C)CC4)c(C)c2cc1C
O=C1CN(C(=O)c2cc([N+](=O)[O-])ccc2Cl)C(c2ccccc2)c2cc(F)ccc2N1
CCOC(=O)C1CCN(Cc2nc3ccccc3c(=O)n2-c2ccc(OCC)cc2)CC1
CCCCCCS(=O)(=O)NCCCc1c[nH]c(N)n1
Cc1ccc(CN(Cc2cc3cc(C)cc(C)c3[nH]c2=O)Cc2nnnn2C2CCCCC2)cc1
CCOc1cc([C@@H]2c3c(oc4c(C)cc(C)cc4c3=O)C(=O)N2CCCO)ccc1O
O=[N+]([O-])c1ccc(OC(F)F)c(CN2CC[C@@H](N3CC=CC3)C2)c1
C(=N\Nc1nc(-c2ccccc2)cc(-c2ccccc2)n1)\c1ccncc1
COC(=O)c1cc(Cl)c(OCc2cccnc2)c(Cl)c1
COc1ccc(CC(=O)N2CCSc3ccc(Cl)cc32)cc1
CN1C(=O)CC(c2cccc(C3CC(=O)N(C)C3=O)n2)C1=O
Cc1ccnc2nc(C(=O)Nc3nnc(-c4ccc(Cl)cc4)o3)nn12
COc1ccc(NC(=O)CN2C(=O)C3(SCC(=O)N3c3cccc(OC)c3)c3ccccc32)cc1
CCOc1ccc([C@H]2C(C(=O)OC)=CN=c3s/c(=C\c4cc(OC)c(OCc5cccc(C)c5)cc4Br)c(=O)n32)cc1OCC
COc1ccc(C(=O)CC(CC(=O)c2ccc(Cl)cc2)c2cccc(C(=O)O)c2)c(OC)c1OC
CNC(=O)[C@@H](C#N)C(=O)c1cnc2c(cnn2C2CCCC2)c1
COc1ccc(NC2=Nc3ccccc3N3C2=Nc2c(c(C)nn2-c2ccccc2)[C@H]3c2ccccc2F)cc1
COc1ccc([C@@H]2CCCN2C(=O)CCC(=O)c2ccc3c(c2)CCC3)c(OC)c1
O=C1/C(=C/c2ccccc2F)CNC/C1=C\c1ccccc1F
CCN1C(=O)C(=Cc2ccc(C)s2)C(=O)N(CC)C1=S
Cc1cccc(NS(=O)(=O)c2ccc(C)c(C(=O)Nc3cc(C(F)(F)F)ccc3N3CCCCC3)c2)c1
CCN(CC)CCOc1ccc(-c2coc3cc(OCCN(CC)CC)ccc3c2=O)cc1
CCCCNC(=O)[C@@H](Cc1ccccc1)N(Cc1c(Cl)cccc1Cl)C(=O)CN(c1ccccc1Br)S(C)(=O)=O
COC(=O)C(C)Sc1nnc(-c2ccncc2)o1
CN(CCCO)c1nc([C@H](N)Cc2cccc(F)c2)nc2ccc(-c3cn[nH]c3)cc12
CC(C)(C)OC(=O)N1CC2(CNC[C@@]23CCNC3=O)C1
O=C(O)c1cn(C2CC2)c2cc(N3CCN(Cc4ccc(OCCCN5CCCCC5)cc4)CC3)c(F)cc2c1=O
COc1ccc(/C=C\c2cc(OC)c(OC)c(OC)c2)cc1OCCN1CCCCC1
Cc1ccc2c(C(=O)Nc3ccc(N4CCOCC4)cc3)cc(NC(=O)C(C)C)cc2n1
O=C(c1cncc(CC[C@H]2COc3ccccc3O2)n1)N1CCCCC1
O=C(Cn1nc2c3c4c(sc3ncn2c1=O)CCCC4)Nc1ccc(F)cc1
O=C(NCC(O)c1ccccc1C(F)(F)F)c1cccnc1
CCOc1cc(N2CCC(N)CC2)ccc1-c1nc2snc(C3CCCCC3)c2c(=O)[nH]1
O=C(Nc1ccc(Cl)cc1)N(CCO)Cc1coc2cccc(OCC3CCCCC3)c2c1=O
C#Cc1cc(F)cc(C[C@H](NC(=O)COC)[C@H](O)CN[C@H]2CC3(CCC3)Oc3ncc(CC(C)(C)C)cc32)c1
O=C(NCc1ccco1)c1cc(-c2ccccc2)nc2ccccc12
Cc1cc(C)cc(OCCNC(=O)[C@@H](C)Oc2ccc(Cl)cc2)c1
O=C(NN1CCCCC1)c1cccc(OCC2CC2)n1
O=P(c1ccccc1)(c1ccccc1)c1cccc2c(-c3ccccc3)cc(-c3ccc(C(F)(F)F)cc3)nc12
COc1ccc(C(=O)NCc2ccc(N3CCCCCC3)nc2)c(C)c1
C=Cn1cc[n+](C2=C(NS(=O)(=O)c3ccc(Br)cc3)C(=O)c3ccccc3C2=O)c1
COc1nsnc1C1=CCCN(C)C1
Cc1ccc(S(=O)(=O)N(CCc2ccccc2)CC(=O)Nc2cc(Cl)ccc2Oc2ccccc2)cc1
Cc1ccc(OCCCC(=O)NCCCN2CCCC2)cc1
C=C[C@H]1C[C@H]2C[C@@H]1[C@H]1[C@@H]3C[C@H]([C@H]4O[C@H]34)[C@H]21
N#Cc1c[nH]c2cc(C(=O)O)ccc12
O=C(O)C[C@H]1CC[C@H](c2ccc(C(=O)Nc3nnc(Cc4cccc(F)c4)s3)cc2)CC1
CC(C)(C)NCC(O)COc1ccccc1C(=O)CCc1ccccc1
C[C@H](NC(=O)CSCc1nc(N)nc(N(C)C)n1)c1ccc2ccccc2c1
O=C(N[C@H]1C[C@@H](c2cc(O)nc(N3CCCC3)n2)C1)c1cnccn1
CC(C)CN1CCC[C@@H]1C(=O)O
CC(C)=CCC/C(C)=C/CNc1ccccc1
CCSc1nnc(NS(=O)(=O)c2cc(Cl)ccc2OC)s1
CCN1CCc2c(sc3c2C(O)=N[C@H](c2cc4c(cc2Cl)OCO4)N3)C1
Cc1ccc(-n2c(S[C@@H](C)C(=O)NC(C)(C)C)nnc2N2CCCCC2)cc1
CCCCN1C(=O)c2ccc(C(=O)Nc3cc(C(=O)O)cc(C(=O)O)c3)cc2C1=O
C=CCn1ncc(Cl)c(Cl)c1=O
O=C(NCC1CCC1)OCCCc1c[nH]cn1
CCNc1nc(-c2ccc(C)cc2)cc(C(F)(F)F)n1
CCOc1ccccc1NC(=O)c1cccc(-c2ccc(S(=O)(=O)N3CCCC3)cc2)c1
Cc1ccc(-c2ccc(/C=N/NC(=O)c3cncc(Br)c3)o2)cc1Cl
CCCCN(C)c1nc2cc(-c3ccc(C)cc3)sc2c(=O)[nH]1
CC1(c2nnc(Cc3ccccc3)o2)CC(c2ccccc2[N+](=O)[O-])=NO1
Nc1nccc2ccc(-c3ccc(Oc4ccccc4)cc3)cc12
COC(=O)[C@H](Cc1c[nH]c(-c2ccc(OC)cc2)n1)NC(=O)[C@H](Cc1c[nH]c2ccccc12)NC(=O)[C@@H](N)Cc1c[nH]c(-c2ccc(OC)cc2)n1
Cc1ccc(C(=O)Nc2cc(S(=O)(=O)N3CCOCC3)ccc2N2CCCC2)c(C)c1
Cc1ccc(NC2=NCC(=O)N2Cc2ccc3c(c2)OCO3)cc1
CC(=O)C1=C(O)C(=O)N(Cc2ccccc2)[C@@H]1c1ccc([N+](=O)[O-])cc1
CN(C)C1CCN(c2ccc(NC(=O)c3ccc(-n4ccnc4)cc3)cc2)C1
CCC1=NN2C(=N)/C(=C\c3cc(C)n(-c4ccccc4OC)c3C)C(=O)N=C2S1
Cc1ccc(NC(=S)N/N=C/c2ccc(O)cc2)cc1
Cc1cc(=O)oc2c(C(=O)/C=C/c3ccccc3)c(O)ccc12
C[C@H](C(=O)Nc1c(-c2ccccc2)nc2ccccn12)n1nc2c(cc1=O)CCC2
Cc1c(C(=O)N(Cc2ccco2)Cc2ccccc2Cl)oc2ccccc12
C[C@H](Sc1cn(CCNC(=O)c2ccccc2F)c2ccccc12)c1ccccc1
COc1cc([C@@H]2CN(C(=S)NC(C)C)C[C@H]2C(=O)NCCC(C)C)cc(OC)c1OC
Cc1cc(CN2CC[C@@H]3[C@@H](CCC(=O)N3CCc3c[nH]cn3)C2)oc1C
Cc1cnccc1NC(=O)c1c(O)c2cccnc2n(-c2ccccc2)c1=O
O=C1S/C(=C\c2cn(Cc3ccc(F)cc3)c3ccccc23)C(=O)N1Cc1ccc([N+](=O)[O-])cc1
COc1ccc(C(=O)C(Nc2ccc(Cl)cc2Cl)c2ccccc2C)cc1OC
Cc1c(NC(=O)c2ccc(-c3ccccc3)cc2)ccc2cc(CN3CCCC3)cnc12
COC(=O)C1CN(C(=O)COc2cc(C)cc(C)c2)c2ccccc2O1
CN(C)CCN(Cc1ccc(-c2ccc(CNCCc3ccccc3)cn2)cc1)C(=O)CCC1CCCC1
Cc1ccccc1Oc1ccc(/N=C/c2cc(C)c(O)c(C)c2)cc1
COC(=O)C1=C(C)N=c2sc(=Cc3ccc(COc4cccc(Cl)c4Cl)o3)c(=O)n2[C@@H]1c1ccc(OC)cc1
O=C(NCCCc1nc2ccccc2[nH]1)N1CCN(c2cccc(Cl)c2)CC1
NNC(=O)c1cc(-c2ccc(-n3ccnc3)cc2)nnc1O
COCCNC(=O)c1ccc(C2SCC(=O)N2Cc2ccco2)cc1
CN(CC(=O)N(C)Cc1ccsc1)Cc1nc2ccccc2c(=O)[nH]1
COc1cccc(C2Nc3ccc4ccccc4c3C3=C2C(=O)CC(C)(C)C3)c1OCC(=O)O
COc1ccc(Nc2ncnc3sc4c(c23)CC[C@H](C)C4)cc1OC
O=C(CC(=O)NC1CCCCC1)N/N=C/c1ccccc1[N+](=O)[O-]
CN(C)S(=O)(=O)C[C@@H]1COC[C@@H]1NC(=O)c1ccc(F)cc1Cl
COc1ccc(C(=O)CC(=O)c2cc(C(=O)CC(=O)c3ccc(OC)cc3)c(O)cc2O)cc1
CCOc1ccc(C(=O)Nc2nnc(SCC(=O)NCC3CCCO3)s2)cc1OCC
COc1ccc(N2CCN(S(=O)(=O)c3cn(C)c(=O)n(C)c3=O)CC2)cc1
COc1ccccc1[C@]1(CCNCc2ccccc2F)CCO[C@H](C(C)C)C1
CCc1ccc2nc(O)c(CN(Cc3ccccc3OC)Cc3nnnn3Cc3ccco3)cc2c1
Nc1cccc(-c2cc(-c3ccccc3)c3cc(Cl)ccc3n2)c1
CCOC(=O)C1=C(c2ccccc2)N=c2s/c(=C3/C(=O)N(C(C)C)c4ccccc43)c(=O)n2[C@H]1c1ccc(OC)c(OC)c1
CN(C)c1cccc(CCNCCc2c[nH]c3ccc(Cl)cc23)c1
CCN1C(=O)[C@]2(c3ccccc31)[C@@H]1C(=O)N(c3ccc(Cl)c(C(F)(F)F)c3)C(=O)[C@H]1[C@H]1CCCN12
CC1(C)CC(C)(C)c2cc(NC(=O)/C=C/c3c(F)c(F)c(F)c(F)c3F)ccc2S1
O=C(O)C1CCN(Cc2coc3cc(Oc4nc5ccccc5s4)ccc23)CC1
O=C1C[C@@H](Sc2nc(-c3ccc(Cl)cc3)cc(C(F)(F)F)n2)[C@H]2CO[C@H]1O2
COc1cc(C2CC(=O)Oc3cc(C)c(Br)c(C)c32)cc(OC)c1OC
CCN1CCN(C(=O)c2cc(=O)c3cc(C)ccc3o2)CC1
COc1cc(OC)cc(C(=O)N2CCC(C(=O)N3CCCCC3)CC2)c1
Clc1ccc(CSc2ncnn2Cc2ccc(Cl)cc2)cc1
Oc1ccc(-c2cc(-c3ccc(C(F)(F)F)cc3)n[nH]2)cc1
CCOc1c(Br)cc(C(=O)N2CCOCC2)cc1OC
COc1cccc(-c2ccc([C@H]3CN(Cc4cnn(C)c4)CCO3)nc2)c1
CCOc1cc2c(OCc3ccccc3)cc3c4cc(OC)c(OC)cc4c[n+](C)c3c2cc1OC
O=C(NCCCNc1cccnc1)c1cnccn1
C=CC[C@H]1C2CC[C@@H]3[C@H](CC[C@@]4(C)[C@H]3CC[C@@H]4[C@H](C)CCCC(C)C)[C@@]2(C)CC[C@@H]1O
COc1ccccc1-n1c(SCC(=O)NC(C)(C)C)nc(=O)c(Cc2ccccc2)c1O
CCOC(=O)/C=C\C(=O)O[C@@H](C)C(=O)Nc1cccc(C)c1
CC(=O)Nc1cccc2c1ccn2CC(=O)Nc1nc[nH]n1
COc1ccc(N([C@H](C)C(=O)Nc2ccc(Cl)cc2C)S(C)(=O)=O)cc1OC
COc1ccc(NC(=O)N2CCn3cccc3[C@H]2c2cc(OC)c(OC)c(OC)c2)c(OC)c1
CN(CCOc1cccc(CNC(=O)c2cc[nH]c2C2CC2)c1)C1CCOCC1
CC(NC(N)=O)C(=O)N(C)CCCc1cc(-c2ccccc2)no1
O=C(N[C@@H]1CCCN(Cc2cccs2)C1)c1cccc2cc[nH]c12
O=C(Cn1c2c(sc1=O)[C@@H]1c3ccccc3OC[C@@H]1CS2)Nc1ccc(F)cc1
CCn1c(SCc2ccc(C(=O)O)o2)nnc1-c1ccc(Cl)cc1Cl
COCc1cccc(C(=O)N(C)CC(=O)Nc2ccc(Cl)c(Cl)c2)c1
O=C(Cc1ccccc1)NCCCc1ccccc1
NC1=N[C@@](c2cc(Nc3nccc4cc(Cl)cnc34)ccc2F)(C(F)F)[C@H]2C[C@H]2O1
CNCc1cc(-c2ccc3c(C(=O)NCCN(C)C)cc4n[nH]c(=O)n4c3c2)cs1
COC(=O)[C@H](CCC(N)=O)NC(=O)[C@@H]1Cc2cccc3c2N1C(=O)[C@@H](NC(=O)/C=C/c1ccc(OP(=O)(O)O)cc1)CC3
O=C(CN1CC[C@H](N2CCOCC2)[C@H](CCCO)C1)N1CCOc2ccccc21
Cc1ccc(OC2(C(=O)NC(C)Cc3ccncc3)CCNCC2)cc1
CC(C)[C@H](NC(=O)[C@H](N)Cc1ccc(N(CCCl)CCCl)cc1)C(=O)O
C/C=C/c1ccc(OC)c(OC)c1OC
COc1cc(C=C2C(=O)c3ccccc3C2=O)cc(Br)c1OCC(=O)Nc1ccccc1
CCOc1ccccc1N1C(=O)NC(=O)/C(=C\c2cc(C)n(-c3ccc(C)c(C)c3)c2C)C1=O
Cn1cnc2cc(-c3ccc(N4CCOCC4)cc3)nc(N3CCOC(CO)C3)c2c1=O
CC(CN1C(=O)c2ccccc2C1=O)OC(=S)N(C(=O)c1cccc([N+](=O)[O-])c1)c1ccc(Cl)cc1
COc1ccc(NS(=O)(=O)c2cc([N+](=O)[O-])ccc2N/N=C\c2c(C)[nH]c3ccccc23)cc1
O=C(O)CCOP(=O)(NCCCl)NCCCl
CCN1CCN(C(=O)CSc2nnc(-c3ccco3)n2CCOC)CC1
Cc1ccc(Cl)cc1-n1ncc2c(O)[nH]c(=S)nc21
C[C@H]1CN([C@@H](C)C(=O)NCCc2ccc(F)cc2)C[C@@H](C)O1
CC[C@H](Oc1ccccc1F)C(=O)N(C)C
CC(C)(C)OC(=O)N[C@@H](Cc1ccc(O)cc1)C(=O)O[C@@H]1CC(O)=NC1=O
COc1cccc2c1CC[C@H](N1CCCC1)[C@H]2N(C)C(=O)Cc1ccc2c(c1)OCO2
Cc1ccc(Cl)cc1/N=C/c1cccc([N+](=O)[O-])c1
CCOC(=O)/C=C/c1cc(OC)c(OC)cc1/C=C/c1ccccc1O
CC1(N)CCN(c2nc(-c3ccc4ccccc4c3)cs2)CC1
O=C(NC1CCCCC1)c1ccc(Oc2ccnc(-c3ccc(F)cc3)n2)cc1
COc1cc([C@@H]2Oc3c(OC)cc4c(=O)c5ccccc5oc4c3O[C@H]2CO)ccc1O
COc1cncc(-c2ccccc2CN(C(=O)c2ccc(-c3ccc(C#N)cc3)o2)c2ccc(N3CCNCC3)cc2)c1
O=C1CS(=O)(=O)[C@]2(C(=O)N(Cc3cccc(F)c3)c3ccc([N+](=O)[O-])cc32)N1c1ccc(F)c(F)c1
Cc1cc(-n2ccnc2)cc2[nH]c(-c3c(NCC(O)c4cccc(Br)c4)cc[nH]c3=O)nc12
CNC(=O)COc1ccc(S(=O)(=O)Nc2cc(Cl)ccc2OC)cc1
CN1CCN(C(=O)CCCCC(=O)Nc2ccc(Nc3c4ccc(NC(=O)CCN5CCCC5)cc4nc4cc(NC(=O)CCN5CCCC5)ccc34)cc2)CC1
COc1ccc(C(=O)OCC(=O)NCCN2C(=O)CSC2=O)cc1[N+](=O)[O-]
CCCCOC(=O)[C@H](O)CC(=O)CCC
O=C(Cc1ccc(Cl)cc1)Nc1ccc2oc(-c3cncc(Br)c3)nc2c1
CC(=O)N1CCO[C@](C)(C(=O)N2CCN(c3ncccn3)CC2)C1
Oc1nc2cccc(Cl)c2n1C1CCN(CC2COc3ccc(F)cc3O2)CC1
CC1(C)CC(=O)C(C2=C(Cl)C(=O)c3ccccc3C2=O)C(=O)C1
CC(C)(CNC(=O)c1ccccc1-n1ccnn1)N1CCOCC1
COc1ccc(NC(=O)c2coc3ccccc3c2=O)cc1O
CCOC(=O)C1=C(C)N=c2s/c(=C/c3cccc(OCc4ccc([N+](=O)[O-])cc4)c3)c(=O)n2[C@H]1c1cc(OC)ccc1OC
COCCN1C[C@H](C(=O)N[C@@H]2CCCN(c3cccnn3)C2)CC1=O
Fc1ccccc1OC1CN(C[C@@H]2CCOC2)C1
Clc1ccc(/N=C/c2c(Sc3ccc(Cl)cc3)nc3sccn23)cc1
O=C(Nc1ccc(Br)cc1)NC(c1ccccc1)c1ccccc1
Fc1ccccc1CSCCCNC(=S)Nc1cccnc1
COC(=O)[C@@H]1[C@H]2C[C@H]3c4[nH]c5cc(OC)ccc5c4CCN3C[C@@H]2C[C@@H](OC(=O)c2cc(OC)c(OC)c(OC)c2)[C@@H]1OC
Cc1ccc(C)c(CN2C(=O)c3ccccc3[S@](=O)c3ccc(C(=O)NCCN4CCCC[C@H]4C)cc32)c1
COc1cc(OC)cc(C2SCC(=O)Nc3cc4c(cc32)OCO4)c1
C=CCN1C(=O)/C(=C2\OC(=O)c3ccccc32)SC1=S
CCCN(CCC)[C@@H]1CCc2ccc(O)cc2C1C
N=C(NOC(=O)c1ccc(Br)cc1)c1ccccc1
CC1(C)[C@H](C=C(Cl)Cl)[C@@]1(Cc1c(F)c(F)cc(F)c1F)C(=O)O
C[C@@]1(NC(=O)CCc2nc(-c3ccccc3)no2)CCS(=O)(=O)C1
C[C@H]1COC(=O)N1c1ccn2ncc(-c3ccc(-c4ncc[nH]4)cc3)c2n1
CC(C)CC(CC(=O)NC(Cc1ccsc1)C(N)=O)NC(=O)[C@H](CCCNC(=N)N)NC(=O)c1ccc(C=C2CCNCC2)cc1
O=C1C(O)=C(c2ccccc2)[C@H](c2ccc(Br)cc2)N1Cc1ccc(Cl)cc1
CC(C)c1ccc(S(=O)(=O)c2nnn3c2nc(N2CCc4ccccc42)c2sccc23)cc1
COc1ccc(CC2(O)CC3CCC(C2)N3C(c2ccccc2Cl)c2ccc(C)cc2Cl)nc1
COc1cc2c(N)nc(N3CCN(C(=O)/C=C/C4CCC4)C[C@@H]3C)nc2c(F)c1OC
CCc1ccc(N[C@H]2NC(=O)/C(=C\c3cc(C)n(-c4ccccc4)c3C)S2)cc1
COc1ccc(N(CC(=O)N(Cc2cccc(Cl)c2)[C@H](Cc2ccccc2)C(=O)NC(C)C)S(=O)(=O)c2ccccc2)cc1Cl
Cc1ccc(NC(=O)NCCn2c(C(F)(F)F)nc3cccnc32)cc1C
CC(C)CN(Cc1cc(Cl)c2c(c1)CCCCO2)C(=O)C1CCN(Cc2cccc3cc[nH]c23)C1
O=c1c2cc(-c3ccccc3)n(-c3ccccc3)c2ncn1CCOCCO
CCN(C[C@H]1CCCN1CC(=O)O)C(=O)OCc1ccccc1
COc1ccc(-c2cc(C(=O)N3CCC[C@@H](C)C3)c3ccccc3n2)cc1
O=C(c1cnc2ccc(Cl)cc2c1NCc1ccc(Cl)cc1)N1CCOCC1
O=C(CCCCn1c(=O)c2ccccc2n(CC(=O)NC2CCCC2)c1=O)NC1CCCC1
Cc1nn(CCc2nnc(-c3nn(C)cc3Br)o2)c(C)c1Cl
Cc1ccc(C)c(CSC2=NCCN2S(=O)(=O)c2ccccc2)c1
COc1ccc(/C=C2/SC(=Nc3ccc(C)cc3)NC2=O)c(OC)c1OC
CCCNc1ccc(O)c2ccccc12
COC[C@@H]1COCCC12CCN(C(=O)c1cnn(C)c1)CC2
COCCNC(=O)c1cc(-c2ccc(C)cc2)n([C@H]2CCS(=O)(=O)C2)n1
CCCCn1c(SCCN2CCCCC2)nc2c1c(=O)n(C)c(=O)n2C
C[C@@H]1CCCc2sc3nc(SCC(=O)c4ccc(Cl)cc4)nc(N)c3c21
COc1ncc(CN2C[C@@H]3C[C@@H](O)CN3C[C@@H]2Cc2ccccc2)cn1
COc1cc(-c2n[nH]c(=S)n2/N=C/c2cccn2C)cc(OC)c1OC
NCCC(=O)N1Cc2ccccc2-c2nnn(-c3cc4cc(Br)ccc4oc3=O)c2-c2ccccc21
C[C@]12C=C[C@@]3(CC[C@@H]4[C@@](C)(COC(=O)/C=C/c5ccc(Cl)cc5)CCC[C@@]4(C)[C@@H]3CC1)C2
C#CCOc1ccccc1CN1CCC[C@@H](C(=O)N2CCOCC2)C1
Cc1nn(Cc2ccccc2Cl)c(Cl)c1C(=O)OC(C(=O)NC(N)=O)C(C)C
Cc1nn(C)c2c1c(-c1ccccc1)cc(=O)n2Cc1ccccc1C#N
CC(C)(C)Nc1cc(-c2nccc3c(-n4cnc(-c5cccnc5)c4)cccc23)ccc1C(N)=O
Cc1nc2ccc(N=C(S)N3CCC(C)CC3)cc2nc1C
Cc1nc(Cc2nc(-c3cc(C)n(NC(=O)c4ccccc4)c3C)cs2)cs1
CCOc1ccc([C@H]2NC(=O)NC(C)=C2C(=O)Nc2ccccc2)cc1
COc1ccccc1-c1ncc(CN(C)Cc2cc(C3CC3)n[nH]2)cn1
Cc1ccc(-c2cn(C)c(/C=C/c3nc4c(F)cccn4n3)n2)o1
CC(C)(C)c1nc(C#N)c(N2CCN(Cc3ccccc3)CC2)o1
O=C1C[C@@H](c2ccccc2O)Cc2nc(N3CCN(C(c4ccccc4)c4ccccc4)CC3)ncc21
NS(=O)(=O)c1ccc(/N=C2\C(=O)Nc3ccc(OC(F)(F)F)cc32)cc1
CCNC(=O)[C@@H](C)N(Cc1ccc(OC)cc1)C(=O)CN(c1ccc(Cl)cc1)S(=O)(=O)c1ccc(OC)cc1
Cc1nc2c(c(-c3ccn[nH]3)n1)C[C@H](C)N(C(=O)c1ccc(F)cc1F)C2
COc1cc(NC2CCCC(NCc3cn(S(=O)(=O)c4ccccc4)c4ccccc34)C2)nc2ccccc12
CCc1ccc(-n2c(SCC(=O)c3ccc(Cl)cc3)nnc2-c2ccncc2)cc1
CCCCCCNCC(O)c1cc(-c2ccc(C(F)(F)F)cc2)nc(-c2ccc(C(F)(F)F)cc2)c1
C[C@](C#N)(NC(=O)COc1ccc(F)cc1Cl)C1CC1
CCc1ccc(CN2C[C@H](OC)[C@H]3COC[C@H]32)o1
COc1ccc([C@@H]2Nc3ccccc3C(=O)N2CC(=O)Nc2ccc(OC)nc2)cc1
Cn1cnnc1SCC(=O)Nc1cc(C(F)(F)F)ccc1N1CCOCC1
O=C1NCN(c2ccccc2)C12CCN(C1CCc3c(Cl)cccc3C1)CC2
CO[C@H](C)CS(=O)(=O)Nc1csnc1-c1ccccc1
C[C@@H]1C[C@H]1C(=O)N1CC2(C1)CN(C)[C@@H](C(=O)NC1CC(F)(F)C1)CO2
CC[C@@H](C(=O)N[C@H](C)CC)N(Cc1ccc(Cl)cc1Cl)C(=O)CSCc1ccc(F)cc1
COc1ccc([C@H](c2c(C)[nH][nH]c2=O)c2c(O)[nH]c(=O)[nH]c2=O)cc1
CO[C@H](C(=O)N(Cc1ccccn1)C1CC1)c1ccccc1
CC(=O)N1CCC(N(C(=O)Nc2ccc(F)cc2)C2CCCC2)CC1
CN(C)S(=O)(=O)c1cccc(C(=O)N2CCN(c3ccc(F)cc3)CC2)c1
Cc1cccc(NC(=O)c2cc3cc(Br)ccc3n2NC(=O)C(=O)Nc2cccc(Cl)c2Cl)c1
CC(C)NC(=O)N(O)[C@@H]1N(Cc2ccc(F)cc2)C(=S)SC1(C)C
COc1c2c(c(OC)c(OC)c1OC)C(C)N(C)CC2
CC(C)C[C@H](NC(=O)c1ccc(-c2ccc(NC(C)C)cc2C(=O)Nc2cccc(C(N)=O)c2)c(C(=O)O)c1)C(N)=O
CC1C(=O)NN=C(c2ccc(N)cc2)c2cc3c(cc21)OCO3
C=CC(=O)Nc1cc(N)nc(Sc2c(OC)nc(N3CCN(C)CC3)nc2OCCOCCOCCOCCO)n1
CN(C(=O)Cn1nc(-c2ccncc2)oc1=O)C1CCCCC1
NC(=O)N1c2ccccc2C=Cc2cc(Cl)ccc21
NCCP(=O)(O)O
CCCCCCCC[C@@H](O)[C@@H](O)CC[C@H](O)[C@H]1CC[C@H](CCCCCCCCCCC[C@H](O)CC2=C[C@H](C)OC2=O)O1
O=C(CO)Nc1ccc2c(=O)n(Cc3ccc(Cl)c(Cl)c3)cnc2c1
O=C(CCN1CCOCC1)NCc1cccc2cnccc12
Cc1nc(CN[C@H](C)c2cccc(S(=O)(=O)N(C)C)c2)oc1C
COc1cccc(-c2cccc(CC[C@]3(C)CC(=O)N(C)C(N)=N3)c2)c1
COc1cc(C(=O)OC2CCC3=C(C2)CC(N2CCCCC2)C3)cc(OC)c1OC
CC(CCc1ccc(O)cc1)NCC(O)c1ccc(O)c(C(N)=O)c1
CSc1cccc(NC(=O)Cn2ccnc2C(C)C)c1
COc1ccc(-c2cc([N+](=O)[O-])cc3cc(C(O)(c4ccc(C#N)cc4)c4cncn4C)oc23)cc1
Cc1nn(C(C)C)c(C)c1NC(=O)[C@H]1OCC(=O)N(C)[C@@H]1c1ccc(Cl)cc1
Cc1cc(C)cc(/N=C/[C@H]2C(=O)NC(=S)N(c3ccccc3)C2=O)c1
CCC(=O)C1(c2ccccc2)CCN(C(=N)Cc2ccc3ccccc3c2)CC1
Cc1ccc(C(=O)N2CCC[C@H](n3c(=O)n(CC4CC4)c4cccnc43)C2)cn1
Clc1ccc(Sc2ncnc3ccccc23)cc1
CC(=O)Nc1ccc(Cl)cc1C(F)(F)C(=O)NNC(=O)c1ccncc1
Cc1nccc(C2CCN(C(=O)CCc3n[nH]c(C)c3C)CC2)n1
CCNC(=O)[C@@H](CC)N(Cc1cccc(C)c1)C(=O)CN(c1cc([N+](=O)[O-])ccc1OC)S(C)(=O)=O
C=CCn1c(Cc2ccc(OCCC)cc2)n[nH]c1=S
COc1cccc2c1O[C@H]1CCC[C@@H]3CN(C)CC[C@@]231
Cc1cc(/C=C2\C(=N)N3N=C(c4cccnc4)SC3=NC2=O)c(C)n1-c1ccc(F)c(Cl)c1
CN1C(=O)CC(N2CCN(c3ccc(Cl)c(Cl)c3)CC2)C1=O
Cn1nnnc1SCCOc1ccc(Br)cc1
Cc1ccccc1C1CC(=O)Oc2ccc(O)cc21
COCCn1/c(=N/C(=O)c2ccc(S(=O)(=O)N3CCc4ccccc4C3)cc2)sc2cc(C(=O)OC)ccc21
CNc1ccc2c(c1)[C@@](C#CC1CC1)(C(F)(F)F)OC(=O)N2
O=c1oc2ccc3ccccc3c2cc1-c1nc2ccccc2o1
CNc1cccc(C(=O)N/N=C2\CC(=O)c3ccccc32)c1
COc1cc(NC(=O)C2CCN(C(C)=O)CC2)ccc1O
CCC/C=C/C=C/CCC[C@]1(OC)C=C[C@@H](CC(=O)OC)OO1
Cc1ncoc1C(=O)N1C[C@H]2CCC[C@@]2(COCC2CCOCC2)C1
Cc1ccc(-c2cc(C(=O)N[C@@H](Cc3ccccc3)C(=O)N3CCCCC3)no2)cc1C
CC(=O)NC1CCN(c2cnc(C3CCNCC3)cn2)CC1
COc1ccc2c3c1[C@H](CN)CC[C@H]3CO2
Cc1cccc(N2CCN(S(=O)(=O)c3ccc(-c4coc(C)n4)cc3)CC2C)c1
CC(C)(C)NC(=O)CCN1CCO[C@H](c2ccc(Cl)cc2)C1
Cc1cc(C)c(NC(=O)N(Cc2ccc(-c3cn[nH]c3)cc2)C2CCCCCC2)c(C)c1
CCCNC(=O)[C@H](C)NC(=O)[C@@H]1Cc2c([nH]c3ccccc23)[C@H]2c3ccccc3C(=O)N12
Cn1c(=O)cc(Sc2ccccc2)n(Cc2cccc(C(F)(F)F)c2)c1=O
COc1ccc(-c2csc(N(CCCN(C)C)C(=O)c3ccc(F)cc3)n2)cc1
CCOc1ccc(/N=C2/NC(=O)/C(=C/c3ccc(O[C@H](C)C(=O)O)c(OC)c3)S2)cc1
Cc1cccc(N2C(=O)C(O)=C(C(=O)c3cccs3)C2c2cccc(Oc3ccccc3)c2)n1
COCC(=O)N(C1CCOCC1)C1CCN(S(=O)(=O)c2cc(F)ccc2F)CC1
Cc1cc(N)nc(CCc2cc(CN)cc(CCc3ccc4cc[nH]c4n3)c2)c1
Cc1ccc(-c2ccc(=O)n([C@@H](C)C(=O)N3CCc4ccccc43)n2)cc1NC(=O)C(C)C
COc1ccc(S(=O)(=O)N(CCCN2CCOCC2)Cc2cccc3ccccc23)cc1
CC[C@H](C(=O)NCCSCc1ccc(C)cc1)N(c1ccccc1)S(C)(=O)=O
COC(=O)c1cc(NC(=O)c2ccc3c(-c4nc5ccccc5[nH]4)n[nH]c3c2)ccc1O
C=C(C)Cn1c(=O)c2c(nc3n2CCCN3Cc2ccccc2)n(C)c1=O
O=C(Nc1cc(-c2ccccc2)no1)[C@@H]1CCCCN1C(=O)N1CCS(=O)(=O)CC1
COc1cc(/C=C/C(=O)NC[C@@H](O)c2ccc(O)cc2)ccc1O
O=C(NS(=O)(=O)c1ccc(OCC2CCOCC2)c([N+](=O)[O-])c1)c1ccc(N2CCN(Cc3ccc(C(F)(F)F)cc3-c3ccc(Cl)cc3)CC2)cc1Oc1ccc2[nH]ccc2c1
Cc1nc2scc(C)n2c(=O)c1S(=O)(=O)Nc1ccc(N2CCN(C(=O)C(C)C)CC2)cc1
COc1cc2ncnc(Nc3ccc4c(c3)CCN4C(=O)Cc3c(C)[nH]c4c(F)cccc34)c2cc1OC
CCCCCCCCCCc1cn(COCCO)c(=O)[nH]c1=O
O=C1C[C@H](c2cc(F)cc(F)c2)c2c(O)nc(SCc3ccc(Cl)cc3)nc2N1
O=C(COC1CCCC1)NCCCn1nc2ccccn2c1=O
O=C(Oc1ccc(Cl)c2ccccc12)N1CCCCC1
CCCc1cc(=O)oc2c3c(c4c(c12)OC(C)(C)C=C4)O[C@H](C)[C@H](C)[C@H]3O
CC(C)Oc1ccc(/C=C/C(=O)N[C@H](C)C23CC4CC(CC(C4)C2)C3)cc1
Cc1ccc(N2C(=O)/C(=C/c3ccc(OCC(=O)Nc4ccc(Cl)cc4Cl)cc3)SC2=S)c(C)c1
COc1cccc(N2/C(=N\C(=O)CCc3ccccc3)S[C@@H]3CS(=O)(=O)C[C@@H]32)c1
CCOC(=O)[C@@H]1CCCN(C(=O)c2ccc(-n3cnnn3)cc2)C1
O=C(NCCc1ccccn1)c1ccc2ccccc2c1
CCN(CC)CCN1C(=O)C(O)=C(C(=O)c2ccc3c(c2)OCCO3)[C@H]1c1ccc(OC)cc1OC
O=C(O)c1ccc2c(c1)nc(Nc1ccccc1)c1ncccc12
CCNc1nc(N2CCN(Cc3ccccc3)CC2)nc2c1C(=O)CCC2
C#CC(C)OC(=O)C1CN=CNC1
COc1ccc(-c2cc[nH]n2)cc1C(F)(F)F
COC(=O)C1CCN(C(=O)CCOc2ccc(F)cc2)CC1
O=C(N[C@@H](CC1CCNCC1)C(=O)O)c1ccc(Cl)c(-c2ccc(Cl)cc2)c1
Cc1cc(N2CCN(c3cnccn3)CC2)n2nc(C)cc2n1
COc1ccc(CN2C(=O)/C(=C/Nc3c(C)cccc3C)c3ccccc3C2=O)cc1
COc1ccc2c3c([nH]c2c1)[C@@H](CO)N(Cc1cc(F)ccc1F)CC31CN(C(=O)CN(C)C)C1
Fc1ccc2[nH]nc(-c3ccccc3)c2c1
Cc1cccc(CN2CC[C@@H]3OCCC[C@]3(COc3cccnc3)C2)n1
CCOc1ccc(N(CN2C(=O)[C@H]3[C@@H]4C=C[C@@H]([C@H]5C[C@H]45)[C@@H]3C2=O)C(=O)C(F)(F)F)cc1
NCC1CCN(Cc2ccn3ncnc(Nc4ccc5c(cnn5Cc5cccc(F)c5)c4)c23)CC1
C#CCNC(=O)CNC(=O)N[C@H](C)c1ccc(OC(C)C)c(OC)c1
CCOc1ccccc1NC(=O)CSc1nnc(CNC(=O)c2cccs2)o1
COc1cc(CN2CCCC(N3CCN(c4ccc(F)cc4)CC3)C2)ccc1F
CC(C)(C(=O)O)c1nc(-c2ccc(Cl)cc2)oc1-c1ccco1
CCCc1cccc(CCC)c1CN
COc1ccc(C(=O)NC2CCN(C)CC2)cc1S(=O)(=O)N(C)C
Cc1ccc(CN2CCc3oc(C)c(C(=O)N4CCN(C(=O)c5ccco5)CC4)c3C2)cc1
COc1cc(S(=O)(=O)N2CCN(c3ccccc3F)CC2)c(OC)cc1Cl
CCCNC(=O)[C@H]1Cc2ccccc2N1C(=O)c1ccccc1
C[C@H](CN(C)CCO)NCCc1nccs1
O=C(CN1CCC(Oc2ccc(F)cc2)CC1)N1CCN(c2ccccn2)CC1
Cc1ccc(C)c([C@@H]2CCCN2C(=O)c2cc(C(C)C)n(C)n2)c1
CC(C)Nc1cccc(F)c1NS(=O)(=O)C[C@@H]1CCCCO1
COc1ccccc1Cc1noc(C2CN(CC(=O)N3CCC(C)CC3)C2)n1
CC(C)(C)C1=CC(=O)C(C(C)(C)C)=C(O)C1=O
CCOC(=O)[C@@H](C)Oc1ccc(C=Nn2c(CC)nc3ccc(Br)cc3c2=O)cc1[N+](=O)[O-]
CCOC(=O)c1ccc(Nc2cc(C)nc3ncnn23)cc1
C[C@H]1CCCC[C@H]1NC(=O)COC(=O)CNC(=O)c1ccc(Cl)cc1Cl
Cc1ccc(S(=O)(=O)NCCC(=O)NCc2cccnc2)cc1
O=c1cc(CN(Cc2cccc(Cl)c2)c2cnccn2)c2ccc(F)c(F)c2[nH]1
COc1c2c(cc3c1[C@H](NC(N)=O)[N+](C)(C)CC3)OCO2
O=C(Cc1nc2ccccc2n1C[C@@H](O)COc1cccc(Br)c1)NCc1ccccc1
COc1ccc2oc([C@H](C)NC(=O)NCC(C)(C)C(N)=O)c(C)c2c1
O=C(NCCCCOc1ccc(F)cc1)c1ccc2[nH]nnc2c1
FC(F)(Sc1ccccc1)c1nc2ccccc2o1
CC(=O)Nc1ccc(-c2nc(-c3ccc(S(=O)(=O)N4CCC(C)CC4)cc3)no2)cc1
NC(=S)c1ccc(-n2nc(C(F)(F)F)cc2-c2cccs2)cc1
CN1CCC(Oc2ccc(NC(=O)Nc3ccc(Oc4ccnc(NC(=O)C5CC5)c4)c(F)c3)cc2C(F)(F)F)CC1
Cc1ccc(C2=NO[C@@H]3CN(Cc4cccnc4)C[C@@H]23)cc1
Cn1cc(C2=C(c3ccsc3)C(=O)NC2=O)c2ccccc21
Cc1cc(C(=O)N2CCc3c(ncnc3N3CCOCC3)C2)[nH]n1
O=C(Cc1csc(NS(=O)(=O)c2ccccc2)n1)Nc1ccc2c(c1)OCO2
CNC(=O)c1cc2ccc(C(O)(c3c[nH]cn3)C(C)C)cc2cc1C
COc1ccc(C(=O)c2cc3cc(C(c4c[nH]c5ccc(OC)cc45)c4c[nH]c5ccc(OC)cc45)cc(C(C)(C)C)c3o2)cc1
Cc1[nH]c2ccccc2c1CCCN1CCC(c2noc3ccc(O)cc23)CC1
COc1ccc(-c2nc3cc(C(F)(F)F)ccc3[nH]2)c(OC)c1OC
C=C(CNN)c1ccc(F)cc1
NC(=O)[C@@H]1CCN(C(=O)NCc2cccnc2OC2CCCC2)C1
Cc1cnn([C@@H](C)[C@H](C)NCc2c[nH]nc2-c2ccc(F)cc2)c1
O=C1Nc2ccc(OC(F)(F)F)cc2/C1=N/NC(=S)Nc1ccc([N+](=O)[O-])cc1
CC(=O)Nc1ccc(/C=C\c2ccc([N+](=O)[O-])cn2)cc1
CS(=O)(=O)N(CC(=O)Nc1ccc(Cc2ccncc2)cc1)c1ccccc1Br
CC(C)N1C(=O)C(=O)N=C1N/C(=N\C(=O)OCCOCc1ccccc1)Nc1ccc(Cl)c(Cl)c1
O=C(c1ccc(N2CCN([C@@H]3CC(=O)N(Cc4cccs4)C3=O)CC2)cc1)c1cccnc1
CCn1c(=O)c2c(nc(/C=C/c3ccc(OCCCC(=O)NCCCCCC(=O)OC)c(OC)c3)n2C)n(CC)c1=O
CCCN(CC(=O)Nc1ccccc1OC)C(=O)c1cc(F)c(F)cc1Cl
Cc1ccccc1CS(=O)(=O)c1nnc(C(C)NC(=O)OC(C)(C)C)o1
O=S(=O)(Nc1nccs1)c1cc(Cl)c(NCCC2CNC2)cc1F
O=C(O)CC[C@H](NC(=O)N[C@@H](CCCCn1cc(COCCOCCNC2CCCCC2)nn1)C(=O)O)C(=O)O
CNCc1ccc(Cl)c(CN(C(=O)[C@H]2CNCC(=O)N2c2ccc(OCCCOCc3ccccc3)cc2)C2CC2)c1
COc1ccccc1CNC(=O)COc1ccc(S(=O)(=O)NCC(C)C)cc1C
Brc1ccc(-c2nnc(-c3ccccc3)c(N3CCSCC3)n2)cc1
O=C(Cc1ccc(F)cc1)NCc1nc(-c2ccccc2)no1
CCCCCCCCCCCCCCCC[n+]1ccc(-c2ccc[n+](CCCCCCCCCCCCCCCC)c2)cc1
Cc1ccccc1NCc1ccc(C(C)C)cc1
N#Cc1c(NC(=O)c2cccc(OCCCN)c2)sc2c1CCCC2
CN(C)c1nc(Cl)c(CN2CCO[C@@H](c3ccccc3)C2)s1
C=CCN(c1ccc(F)cc1)S(=O)(=O)c1cc(C(=O)OCC(=O)N2CCNC2=O)ccc1Cl
Cc1cccc(OCCNC(=O)CCCc2ccc3c(c2)OCCO3)c1
COc1ccc(NC(=O)[C@@H]2Oc3c(c(=O)oc4ccccc34)[C@H]2c2cc(OC)c3c(c2OC)OCO3)cc1
Cc1oc(=O)oc1COC(=O)c1cccc(NC(=O)[C@@H]2C[C@H](SC3=C(C(=O)O)N4C(=O)[C@H]([C@@H](C)O)[C@H]4[C@H]3C)CN2)c1
Cc1ccc(C)c(N2CCN(C(=O)CCCn3c(=O)c4cccn4c4ccccc43)CC2)c1
CCCCNC(=O)[C@H](CC)N(Cc1c(Cl)cccc1Cl)C(=O)CN(c1ccccc1F)S(=O)(=O)N(C)C
Cc1cnc(Cl)nc1-c1ccc(N(Cc2ccc(CNC(=O)CC(F)(F)F)cc2)C(=O)c2ccc(O)cc2O)cc1
Cc1ccccc1CN1CC[C@@]2(C[C@H](N3CCCC3=O)CCO2)C1
Cc1ccc(Cl)cc1-n1ncc2c(NC3CCCCCC3)ncnc21
CCOc1cc(/C=C2\C(=O)NN(c3ccccc3)C2=O)cc(Cl)c1OCc1ccc(Cl)c(Cl)c1
Nc1ncc(C(=O)c2ccc(Cl)cc2)n1-c1ccc(F)c(Cl)c1
COc1cccc(NC(=O)CCc2ncc(-c3cccc(OC)c3)o2)c1
Cc1cn(-c2ccc3n(c2=O)CCN([C@@H](C)[C@@H]2CC[C@H](c4cc(F)c(Cl)c(Cl)c4)O2)C3=O)cn1
CC(C)c1ccc(-c2c(C(O)(CNc3ccc(Br)cc3)c3ccc(Cl)cc3)nnn2Cc2ccccc2)cc1
Fc1c(Cl)cccc1CNc1cc([C@@H]2CCOC2)ncn1
C/C=C/c1ccc(Nc2ncnc3cc4c(cc23)OCCO4)cc1
N=C(N)SCOC(=O)c1ccccc1
C#CCSc1ccc([N+](=O)[O-])cn1
CCN1CCC(N(Cc2cccc(OC)c2)C(=O)Nc2ccc(C)cc2Cl)CC1
CN(CC(=O)N1N=C(c2cccs2)C[C@@H]1c1ccco1)Cc1nc2ccccc2c(=O)[nH]1
COc1ccc(F)c(F)c1C(=O)NCCCc1nc(C)c(C)s1
Cc1cnc(C)c(NC[C@@H]2C[C@@H](O)CN2Cc2ccccc2)n1
CN(C)c1nc(Nc2ccc(C(F)(F)F)cc2)c2nc(Nc3c(Cl)cccc3Cl)sc2n1
O=C1/C(=N\N=C\c2coc3cc(O)ccc3c2=O)c2ccccc2N1Cc1ccc(Br)cc1
CC(=O)Nc1ccc(N2C(=O)[C@@H]3[C@@H](CC(C)C)N[C@]4(C(=O)N(Cc5ccc(F)cc5)c5ccccc54)[C@@H]3C2=O)cc1
CCOc1ccc(N2C(=O)CN(c3cccc4ccccc34)C2=S)cc1
Cc1ccc(N2C[C@@H](C(=O)Oc3ccc(C)c(C)c3)CC2=O)c(C)c1
COc1ccc(NC(=O)c2ccc(-c3nc4ccccc4[nH]3)cc2)c(OC)c1
COC(=O)C1=NN(c2ccc(Cl)cc2)[C@@]2(S1)S/C(=C/c1ccc(C)cc1)C(=O)N2c1ccccc1
Cn1c(=O)[nH]c(=O)c2c1nc(N1CCN(C(=O)c3ccco3)CC1)n2CCCSc1ncccn1
Nc1nccc2cc(CNCCOc3ccccc3)ccc12
CC(=O)Nc1ncc(CN2CCC(c3ccccc3)CC2)s1
COc1ccc2c3c(c4cc(OC)c(OC)cc4c2c1)C[C@H]1CN(S(C)(=O)=O)CCN1C3
CC[C@H](C(=O)N(Cc1cc(NC(=O)C2CCC2)ccc1N(C)C)[C@H](C)C(C)C)c1ccccc1
CCCCCCOc1c(Cl)cc(/C=C2/C(=O)NC(=O)N(c3ccc(OCc4ccccc4)cc3)C2=O)cc1OC
CCOc1cc2c(Nc3cc(OC)c(Cl)cc3Cl)c(C#N)cnc2cc1C#Cc1cccc(CN(C)C)n1
O=C(Nc1ccccc1)[C@@H]1CC=C[C@@H]2CCN(Cc3ccc(Cl)c(Cl)c3)C(=O)[C@@H]21
COc1ccc(NC(=O)NS(=O)(=O)c2ccc(N3N=C(c4cccs4)CC3c3cccs3)cc2)cc1
Cc1ccccc1Nc1nc(N2CCC(CN)CC2)nc2c(NCC3CC3)ncnc12
Cc1ccc(CC(=O)NCCCN(C)C)cc1C
CNC(=O)N1CCC(CC[C@@H](NS(=O)(=O)Cc2ccccc2)C(=O)N[C@@H](CCC2CCNCC2)C(=O)NCc2ccc(C(=N)N)cc2)CC1
O=[N+]([O-])c1cccc(-c2cc(Cl)ncn2)c1
Cc1ccc(C(O)(CCN2CCCCC2)c2ccccc2)cc1
C[C@H](NC(=O)CN(C)CCO)c1cn2ncsc2n1
Cc1c(Cl)cc(OCCN2CCOCC2)c2nc(CCc3nc(N4CCCC4)nn3C)nn12
O=C(Nc1ccc2c(c1)-c1cc(NC(=O)c3cccc(C(F)(F)F)c3)ccc1S2(=O)=O)c1cccc(C(F)(F)F)c1
CC1CCC2(CC1)OC[C@@H](CNC(=O)[C@@H]1CCCc3cccnc31)O2
CCC(C)[C@H](NC(=O)[C@@H](NC(=O)C(F)(F)C(=O)[C@@H](NC(=O)[C@@H](NC(=O)OC(C)(C)C)C(C)C)C(C)C)C(C)C)C(=O)OC
Cc1cccc(NC(=O)Nc2c(C)nc3ncnn3c2O)c1C
COc1ccc(N2CCN(C(=O)c3oc4ccccc4c3NC(=O)Cc3ccc(OC)c(OC)c3)CC2)cc1
Cc1nc(CN2CCC3(C=Cc4ccccc43)CC2)co1
COc1cc(OC)c2c(c1Cl)O[C@]1(C(=O)C3=C(C[C@@H]1C)Nc1c(c(=O)n(C)c(=O)n1C)[C@@H]3c1cc3ccccc3nc1O)C2=O
Cc1sc2nc(CCNCc3ccc4cccc(F)c4n3)nc(O)c2c1C
CCN(c1ccc(NC(=O)Cn2c(=O)[nH]c(=O)c3ccccc32)cc1)C(C)C
O=C(CSC(=S)N1CCCC1)NC1c2ccccc2-c2ccccc21
CCOC(=O)C1=C(C)N=c2s/c(=C/c3cccc(OCc4ccc(Cl)cc4)c3)c(=O)n2[C@H]1c1ccc(SC)cc1
OCc1cc2c(o1)c1ccccc1n2Cc1cccc(Cl)c1
CCN(Cc1nccn1C)C(=O)c1ccc(NC2CCOCC2)nc1
C[C@@H](CO)Nc1nc(Nc2ccc(O)cc2)cc(C2CC2)n1
CCSc1cc(NC2CCCC2)cc2c(-c3ccnc(NC4CCCC4)n3)c(-c3ccc(F)cc3)nn12
C[S@](=O)Cc1cccc(C(=O)NCC2(c3ccccc3)CCCCC2)c1
CCCCCCc1cn(-c2ccc(O)c(C(=O)N3CCCCC3)c2)nn1
Cc1ccc(/C(=N/O)NCC(C)(C)C)c(OCc2cccc(F)c2)n1
COc1ccc(N2CCN(C(=O)Cn3cnnn3)CC2)cc1
COCCN(Cc1ccsc1)C(=O)c1cc(-c2ccc(C)o2)n[nH]1
CCOC(=O)c1cccc(NS(=O)(=O)c2ccc3c(c2)sc(=O)n3Cc2ccccc2)c1C
Cc1noc(C)c1C(=O)N1CCC[C@](C)(c2noc(-c3ccncc3)n2)C1
O=C(O)[C@@H]1Cc2ccccc2CN1C(=O)C[C@H]1Sc2ccccc2NC1=O
C[C@H]1CCC[C@H](C)N1C(=O)Cn1c(SCC(=O)N2CCCCC2)nc2ccccc21
CC(=O)Oc1ccccc1CCC(=O)O[C@H]1Cc2cc3ccc(=O)oc3cc2OC1(C)C
O=C(O)[C@@H]1CN(C(=O)c2ccc(O)cc2)C[C@H]1c1cccc(F)c1
C[C@H]1CN(C(=O)/C=C\c2ccc(OCc3cccnc3)cc2)C[C@@H](C)N1
COc1ccc([C@@H](CC(=O)O)NC(=O)[C@H]2CC(=O)Nc3ccccc32)cc1OC
C[C@H](C(=O)NC1CCCC1)N(Cc1ccc(Cl)cc1)C(=O)CCCN(C)S(=O)(=O)c1ccccc1
O=c1n(CCOCc2ccccc2)nnn1-c1ccccc1
CCOc1ccc(C#Cc2ccc(CC(C)NC(=O)C3CCNC3=O)cc2)cc1
OCc1ccc(-c2ccc3c(O)cccc3c2)cc1
COc1ccc(OC)c(COc2ccc([C@@H]3NC[C@@H](C(=O)O)S3)cc2)c1
O=C(N[C@H]1CCN(Cc2ccc(OCCN3CCOCC3)c(Br)c2)C1)c1ccc(Cl)c(Cl)c1
CCCCNc1cc(N2CCN(C[C@H]3CCOC3)CC2)nc(N)n1
CCCCNC(=O)c1c(C)c2c(=O)n(CC(=O)Nc3ccc(CC)cc3)ncn2c1C
COc1cc(C(=O)NC2CCN(C)CC2)c(F)cc1Nc1ncc(C(F)(F)F)c(Oc2cccc3c2C(=O)N(C)C3)n1
CCCCNC1CCc2cccc(O)c2C1
CC(=O)c1ccc(NC(=O)C2CCC(CNS(=O)(=O)c3ccc4c(c3)CCCC(=O)N4)CC2)cc1
CCOc1ccc(-c2nnc(SCC(=O)NC(C)(C)C)nc2-c2ccc(OCC)c(OC)c2)cc1OC
c1ccc(Sc2cccc(N3CCNCC3)c2)cc1
COc1cccc(N2C[C@H](c3nc(C)no3)CC2=O)c1
CO[C@H]1C[C@H](OC(C)=O)[C@@H](COC(C)=O)O1
CC[C@H](C)[C@@H](CO)NS(=O)(=O)c1cc(Cl)ccc1Cl
CCNc1ccccc1CN
C=CCSC(=S)NCc1cc2ccccc2[nH]1
COc1cccc2c1O[C@H](c1ccsc1)N1N=C(c3ccc(C)c(C)c3)C[C@H]21
O=C(O)CCCN1N=C(c2c(-c3ccc(Cl)cc3)c3ccccc3[nH]c2=O)CC1c1ccc(Cl)cc1
COc1ccc(-n2nc(C(=O)NCCc3ccc(OC)c(OC)c3)c3c4ccccc4n(C)c3c2=O)cc1Cl
Cc1cc(S(=O)(=O)NCc2ccccc2)ccc1OCC(=O)NCCCN1CCOCC1
Cc1cc([C@@H]2C[C@H]3CC[C@H]2N3)on1
Cc1cccc(C(=O)NCCCCNCc2cccc(-n3cccn3)n2)c1
Cc1noc(CO[C@@H]2CCCN(C(=O)Cc3cccs3)C2)n1
O=C(Nc1cnn2ccc(N3CCC[C@@H]3c3cc(F)ccc3F)nc12)C1(O)CC1
O=C1NC(=S)N(c2ccc(Br)cc2)C(=O)/C1=C\c1ccc(-c2cccc(C(=O)O)c2)o1
O=C(CN1CCN(Cc2ccc(Cl)cc2)CC1)N1c2ccccc2[C@H]2CCCC[C@H]21
O=S(=O)(NCCN1CCOCC1)c1ccc(Nc2ccc(Cl)cc2Cl)cc1C(F)(F)F
Cc1c(Cl)cccc1NS(=O)(=O)c1ccc(-c2c(C)c(CC(=O)O)cc3ccc(F)cc23)cc1
C[C@H]1CCc2c(C(=O)NC[C@H](C)N3CCOCC3)csc2C1
COc1ccc(CCC(C)NCCc2ccccc2)cc1
O=C(Nc1cc(Cl)ccc1O)c1cc(-c2ccco2)on1
N#CC1(NC(=O)COC(=O)Cc2cc(Cl)c3c(c2)OCCO3)CCCC1
CCNC(=O)NC[C@@H]1C[C@H]1c1cccc2c1C[C@@H](CCCCc1ccccc1)O2
O=C(N[C@H](Cc1ccccc1)C(=O)OC(Br)CBr)OCc1ccccc1
COc1cccc(C(=O)N[C@H](CC(C)C)C(=O)O)c1
COc1ccc(CCS(C)(=O)=O)c(Nc2nc3ccccc3nc2NS(=O)(=O)c2ccccc2)c1
O=C(N[C@@H]1CCCN(c2ncccn2)C1)c1cc2ccccc2cc1O
NC(=O)C1CCN(CCCNC(=O)Nc2nncs2)CC1
O=C(NOC(=O)c1ccc([N+](=O)[O-])o1)c1ccc(OC(F)F)cc1
CN1CCC(C(=O)c2cccc(NC(=O)c3ccc(F)cc3)n2)CC1
O=C(COc1ccc2c3c(c(=O)oc2c1)CCC3)NCCCN1CCCC1=O
COc1ccc([C@@H]2C[C@@H](c3ccccc3OC)n3ncnc3N2C(=O)c2cccc([N+](=O)[O-])c2)cc1
COC(=O)C1=C(C)N(Cc2ccc(C)cc2)C(=O)/C1=C\c1sccc1C
CC(C)c1cc(C(=O)N2CCc3cc(NC(=O)CCCCCCC(=O)NO)ccc32)c(O)cc1O
O=C(Nc1ccc(Sc2nc(Cl)cc(Nc3c[nH]nc3-c3nc4cc(CN5CCOCC5)ccc4[nH]3)n2)cc1)C1CC1
Cc1nc(NC(C)c2cccc(OCCCN(C)C)c2)cc(-c2ccc3occ(C)c3c2)n1
O=C(Nc1ccc(S(=O)(=O)N2CCCCC2)cc1)c1cccs1
CC1C[C@H]2[C@@H]3CCC4=CC(=O)C=C[C@]4(C)C3=CC[C@]2(C)[C@H]1C(=O)CN1CCN(c2cc(N3CCCC3)nc(N3CCCC3)n2)CC1
COc1ccc(CNC(=O)c2ccc(CS(=O)(=O)c3ccc(C)cc3)o2)cc1
CS(=O)(=O)Nc1ccc(-c2coc3cc(C#CC4CNC4)ccc3c2=O)cc1
NCC1CCN(c2cnn(CCCn3cccn3)c(=O)c2)CC1
CN(C)c1ccc(-c2ccc3ncc4c(c3n2)n(C2CCN(C(=O)C(C)(C)O)CC2)c(=O)n4C)cn1
CCc1nnc(CN(C)C(=O)[C@@H]2[C@@H]3C=C[C@@]4(CN(Cc5cccnc5)C(=O)[C@H]24)O3)o1
CN1CCN(c2ccc3c(c2)CN(C(=O)OCc2ccccc2)C3)CC1
COc1cc(/C=C2/C(=O)NC(=S)N(c3ccc(Cl)cc3)C2=O)cc(Br)c1OC
COc1cnc(-c2nccs2)c2[nH]cc(C(=O)C(=O)N3CCN(C(=O)c4ccccc4)CC3)c12
CNC(=O)c1ccc(C2CN(C(=O)c3cncs3)CCO2)nc1
CCC(=O)N(CCc1ccc(OC)cc1)[C@H]1CC(=O)N(c2ccc(OC)cc2)C1=O
Cn1cccc1C(/C=C/c1ccccc1[N+](=O)[O-])c1cccn1C
Cc1ccc(S(=O)(=O)Nc2ccc(Cl)c(C(F)(F)F)c2)cc1C(=O)N1CCOCC1
CS(=O)(=O)N1C=C[C@H]2[C@H](C=C1)[C@@]1(c3ccccc3)O[C@@]2(c2ccccc2)c2ccccc21
CCS(=O)(=O)N1CCC(C(=O)Nc2nc(-c3cc(C)n(C[C@H]4CCCO4)c3C)cs2)CC1
Cc1cc(C(=O)N2CCN(c3ncccn3)CC2)nn1C
O=C1NC2(CCCCCC2)C(=O)N1Cc1c(F)cccc1Cl
CC(=O)Nc1cc(NC(C)=O)c2c(c1)C(CC#N)(OC(C)=O)C(=O)N2
O=C(Nc1ccc(Cl)cc1)NC1CCS(=O)(=O)C1
CCn1cc(C(=O)NC2CCCCCC2)c(=O)c2cc(C(F)(F)F)ccc21
O=C(NCc1ccccc1)c1cc(C(F)(F)F)cc(C(F)(F)F)c1
C=CCN(C(=O)[C@@]1(C)Cc2ccccc2C(=O)O1)c1ncccc1C(=O)OC
CN(C)[C@H](CNC(=O)N[C@H](CCO)C1CC1)c1cccs1
N=C(N)NCCC[C@H](NC(=O)[C@@H]1CCCN1C(=O)[C@H](CCN)NC(=O)[C@@H](N)CCCCNC(=O)C(N)CCCCN=C(N)N)C(=O)O
CC(=O)N1CCc2cc(S(=O)(=O)CCC(=O)N3CCN(c4ccccc4)CC3)ccc21
CCN(CC)CC#CCC1(c2ccccc2)SCCCS1
C[C@H](CNC(=O)[C@@H]1C[C@H]1[N+](=O)[O-])N1CCc2sccc2C1
CC[C@H](C)[C@@H]1NC(=O)[C@@H](Cc2ccccc2)NC(=O)[C@@H]2CCCN2C(=O)[C@@H](Cc2c[nH]cn2)NC(=O)[C@@H]2CCCCN2C(=O)[C@H]2CCCCN2C1=O
O=C(CSc1nnc(CNc2ccc(F)cc2)n1-c1ccccc1)Nc1ccc([N+](=O)[O-])cc1
Cc1ccc(C[C@@H](C#N)Sc2nnc(C[C@H]3CCS(=O)(=O)C3)o2)cc1
CCOC(=O)[C@H](Cc1ccccc1)NP(=O)(CCOCN(CCn1cnc2c(=O)[nH]cnc21)CCP(=O)(N[C@@H](Cc1ccccc1)C(=O)OCC)N[C@@H](Cc1ccccc1)C(=O)OCC)N[C@@H](Cc1ccccc1)C(=O)OCC
Cc1cc2c3c(c1)C(c1ccccc1)=N[C@@H](NC(=O)c1ccncc1)C(=O)N3CC2
CN1CCN(c2nc3c(c(Nc4ccc(C(F)(F)F)nc4)n2)CCN(c2ncccc2C(F)(F)F)CC3)CC1
CNC(=O)CN(C)c1nc(-c2cccs2)nc2sc(C)c(C)c12
CCN1CCN(c2ccc(Nc3nc(N)c4scc(-c5cccc(C(=O)NC)c5)c4n3)cc2)CC1
CCc1ccc(N2C[C@H](C(=O)OCC(=O)Nc3ccc(Br)cc3CC)CC2=O)cc1
C[C@@H]1O[P@](=O)(Nc2cc(Cl)ccc2Cl)O[C@@H]2CCCC[C@@H]12
O=C(O)/C=C/C(=O)N1CCN(c2ccc(C(F)(F)F)cn2)CC1
CS(=O)(=O)N(CC(=O)Nc1ccccc1C(=O)NC1CCCCC1)c1cccc([N+](=O)[O-])c1
O=C1N[C@@H](C(=O)NO)C[C@H]1c1ccc(OCc2ccccc2)cc1
CC(C)C[C@@H](N[P@](C)(=O)c1ccccc1)C(=O)NO
COc1ccccc1N1CN(S(=O)(=O)c2ccc(C)cc2)c2nc3ccccc3nc21
O=C1Nc2cccc3c2C1(CCCN1CCc2ccccc2C1)CCC3
C[C@@](O)(c1ccc(C(=O)N(C2CC2)[C@H]2CC[C@](C#N)(c3ccccn3)CC2)cc1)C(F)(F)F
CC(=O)N1[C@@H]2C=C(c3cnc(NCc4ccc5c(c4)OCC5)c(C(=O)NC[C@H]4COc5ccccc5O4)c3)C[C@H]1CC2
COc1cccc(CNC(=O)CSc2cc(C)nc(-c3cccnc3)n2)c1
Cc1ccc(CN(C(=O)c2ccncc2)[C@H]2CCc3ccccc32)cc1
O=C(/C=C/c1cccnc1)NCCCCCCS(=O)(=O)N(CCN1CCOCC1)OCC1CCCCC1
FC1(c2cn(-c3ccc(Br)cc3)nn2)CN2CCC1CC2
CN1C(=O)S[C@H](Nc2ccc(Cl)cc2)C1=O
Nc1nc(C(=O)NCc2cccnc2)nc(-c2ccco2)n1
C[C@@H]1CCCC[C@@H]1NC(=O)[C@@H]1CCCCN1S(C)(=O)=O
CC(C)C[C@H](N)C(=O)N(CC(=O)NCc1ccccc1)[C@H](C(=O)O)C(C)C
Clc1ccc(C(CCn2cncn2)Oc2ccc(Cl)cc2Cl)cc1
CCN(CC)C(=O)[C@H](c1ccccc1)N1CCN(C(=O)C(=O)NC2CC2)CC1
CCn1cc(NC(=O)NC[C@H](O)COc2cccc(F)c2)cn1
Cc1nccnc1NC(=O)Nc1cccc2c1C1CCCCN1C2=O
CC(C)n1ncc2c(NC(=O)c3cc(-c4cccs4)nc4c3cnn4C(C)C)cc(-c3cccs3)nc21
C[C@]1(c2ccsc2)NC(=O)N(C[C@H](O)COc2ccc(C#N)cc2)C1=O
Cc1cccc(CS(=O)(=O)N2CCC(C(=O)Nc3ccccc3C(C)C)CC2)c1
N#CCn1c(-c2ccc(Cl)cc2)cc(-c2ccc(Cl)cc2)c(C#N)c1=O
C/C=C/C(=O)NC/C=C/c1cc(OCCc2ccc(F)cc2)cc(O)c1C(=O)OC(C)C
Cc1ccc(F)cc1NCC(=O)Nc1ccc(C)c(S(=O)(=O)N(C)C)c1
CN1CCC(c2ccc(-c3ccc(CO)cc3)cn2)CC1
CCC(C)(C)NCC(=O)N[C@H](c1ccccc1)c1ccc(Cl)cc1
C=CC1=C(C(=O)NCCc2cccc(F)c2)C(c2ccc(OC)cc2)OC1
Cc1nccn1[C@H](C)CC(=O)N1CCc2onc(Nc3ccccc3F)c2C1
CC(C)[C@@H]1CN(C(=O)c2ccn(C(C)C)n2)CCCO1
CC(C)CCC[C@@H](C)C1CCC2C3CC=C4CC(OC(=O)NCCN(C)C)CCC4(C)C3CCC21C
O=C1COC2(CCN(CC3CC3)CC2)CN1c1ccsc1
COC(=O)c1c(C)nn(-c2ccccc2)c1OCCCOc1nc(C)cc(C)c1C#N
CNCC1CCN(C(=O)Nc2ccc(F)cc2)CC1
COc1cccc(-c2nc3ccc(-c4ccccc4C#N)cn3c2CN2CCN(C(=O)C3CCC3)CC2)c1
O=C(CC1CCCCC1)c1cc(O)c(O)c([N+](=O)[O-])c1
CCCCC[C@@H]1OC[C@@]2(CO)[C@@H](C)C=C(C)[C@H]1[C@H]2C
OC1CCN([C@@H]2CCN(Cc3cccc(Oc4ccccc4)c3)C[C@H]2O)CC1
CCOC(=O)[C@H]1CCCN1C(=O)c1ccn(Cc2ccccc2)c1
Cc1cc(S(=O)(=O)Nc2nn(-c3ccccc3)cc2C)c(C)s1
Cc1cc(C)cc(Nc2cnccc2NS(C)(=O)=O)c1
CCOC(=O)C1=C(NC(=O)c2ccc(C)cc2)S/C(=C\c2cc(Br)cc(OCC)c2O)C1=O
CCN(Cc1ccoc1)C(=O)[C@@H]1CCC(=O)N1Cc1ccc(C)cc1
CS(=O)(=O)Nc1ccc2c(c1)S(=O)(=O)N=C(c1c(O)c(-c3ccc(Cl)s3)nn(CCC3CC3)c1=O)N2
Cc1cc(S(=O)(=O)NC[C@H](O)c2ccc(F)cc2)sc1Br
CC(C)(O)Cn1nc(-c2ccco2)nc1[C@@H]1C[C@@H]2C=C[C@H]1C2
Nc1ccccc1-c1nnc(C(=O)NCc2c(N)cccc2F)o1
C=CCc1cc(/C=C2\S/C(=N/C)N(C)C2=O)ccc1OCC(=O)OCC
C[C@H](NC(=O)COc1ccc(C(C)(C)C)cc1)c1ccc2c(c1)OCCO2
CCCCn1ccnc1[C@H]1CCCN(c2ccncc2C)C1
CCc1cccc(NC(=O)c2cccc(Oc3cccnc3)c2)n1
N#Cc1cn(-c2ccc(C(=O)O)cc2)cc1-c1ccc(OCc2ccccc2)cc1
Cc1ccccc1CS(=O)(=O)N1CCC(C(=O)N(C)C)CC1
CCc1nccc(-c2ccc(C(=O)N3CCN(C(C)(C)C)CC3)c(F)c2)c1C#Cc1ccc(NC)nc1
Cc1cccnc1C(=O)N1C[C@@H](c2ccc3c(c2)OCO3)[C@@H]2[C@H]1C1CCN2CC1
C=CC(=O)Nc1cc(Nc2ncc(C(=O)Nc3cc(NC(=O)c4ccc(OC)cc4)ccc3C)c(NC)n2)ccc1C
CNC(=O)[C@H](NC(=O)c1cnn(C2CCOCC2)c1C)C(C)C
CC(C)[C@H](C(=O)Nc1ccc(C#N)cn1)N1CCCC1=O
CN(C)CC(CCC(CN(C)C)C(=O)c1ccccc1)C(=O)c1ccccc1
CC#C[C@]1(CO)O[C@@H](n2ccc(=O)[nH]c2=O)[C@H](O)[C@@H]1O
Cc1noc(NS(=O)(=O)c2ccc(Nc3nccc(-c4ccc(Cl)cc4Cl)n3)cc2)c1C
Cc1cnc(NC(=O)[C@H](C)Oc2ccccc2C)s1
Sc1nnc(COc2ccccc2)n1/N=C/c1ccc(Cl)cc1
Cc1cscc1-c1noc2cnc(N[C@@H](C)c3ccccc3)cc12
Cc1cc(-c2c(O)c3cc(-c4ccc(N(C)C)cc4)c(Cl)cc3[nH]c2=O)on1
Cc1ccc(NS(=O)(=O)c2cc3[nH]c(=O)c(=O)[nH]c3cc2C)cc1Cl
C#CCNC(=O)Nc1cccc(CNCc2ccc(C)cc2)c1
CN1Cc2c(C#Cc3ccccc3)ncn2-c2cccc(Cl)c2C1=O
O=C(NC12CC3CC(CC(C3)C1)C2)N1CCC(O)(c2ccc3c(c2)OCO3)CC1
CC(C)(C)c1cc(NC(=O)[C@@H]2[C@@H]3C=C[C@H]([C@H]2C(=O)NCCCCN2CCCC2)C32CC2)no1
COc1ccc2nc(N3C(=O)C(=O)/C(=C(/O)c4ccc(Cl)cc4)[C@H]3c3ccccc3F)sc2c1
NC(=O)CNC(=O)c1ccc2cc(Oc3ccc(C(F)(F)F)cn3)ccc2n1
CC(C)n1nccc1NC(=O)CSc1n[nH]c(=O)n1CCc1ccccc1
Clc1ccc([C@H]2Oc3ccccc3[C@H]3CC(c4ccc(Br)cc4)=NN32)cc1
COCCCN=C(S)N1CCC(C(=O)c2ccc(Cl)cc2)CC1
C[C@H]1C[C@H](C)CN(S(=O)(=O)c2ccc(C(=O)Nc3cnccc3NC(=O)c3ccc(S(=O)(=O)N4C[C@@H](C)C[C@@H](C)C4)cc3)cc2)C1
Cc1ccc(C(=O)N(Cc2ccccc2)Cc2ccccc2)cc1N(C)S(C)(=O)=O
Cc1noc([C@H]2CCCN(c3nc(CN4CCOCC4)nc4scc(-c5ccccc5)c34)C2)n1
Fc1ccc(C2(Cc3nnn[nH]3)C3CC4CC(C3)CC2C4)cc1
FC(F)(F)c1ccc(-c2nnc(CCSC(=S)NCc3cccnc3)o2)cc1
COCCn1ccc2nc3ccn(Cc4ccccc4OC)c(=O)c3cc2c1=O
CCCC(=O)N1CCC(N2C(=O)[C@@H](O)C23CCCCC3)CC1
Cc1c(C(=O)Nc2c(F)cccc2F)sc2ncn(Cc3ccccc3F)c(=O)c12
O=C(N[C@H]1C[C@@H]2c3[nH]c4ccccc4c3C[C@@H](C(=O)N[C@H](Cc3ccccc3)C(=O)O)N2C1=O)OCc1ccccc1
Cc1ccc(OCCCC(=O)N2CCOCC2)cc1
COc1cc(/C=C/C(=O)OCC(=O)N2c3ccccc3C[C@@H]2C)cc(OC)c1OC
COc1nc(N(C)C)ncc1-n1nc2c(c1C(C)C)C(c1ccc(C#N)c(F)c1)N(c1cc(Cl)cn(C)c1=O)C2=O
CNc1ccccc1C(=O)O[C@H]1[C@@H](O)[C@H](COP(=O)(O)OP(=O)(O)OP(=O)(O)OP(=O)(O)OC[C@H]2O[C@@H](n3ccc(=O)[nH]c3=O)[C@H](O)[C@@H]2O)O[C@@H]1n1ccc(=O)[nH]c1=O
CC[C@@H](C)NC(=O)[C@@H](Cc1ccccc1)N(Cc1ccc(Cl)cc1Cl)C(=O)COc1ccc(Cl)cc1Br
Cc1ccc2c(c1)N(CCO)/C(=C/c1cccc[n+]1C)S2
Nc1ncnc(Nc2ccc(S(N)(=O)=O)cc2)n1
O=C(c1ccc(OCc2cccnc2)cc1)N(C[C@@H]1CCOC1)C1CC1
COC(=O)[C@H](CCCNC(=N)N)NC(=O)[C@H](Cc1c[nH]c(-c2ccc(OC)cc2)n1)NC(=O)[C@H](CCCNC(=N)N)NC(=O)OC(C)(C)C
COCCn1cc(NC(=O)N2CCC[C@@H]2c2cc(C)no2)cn1
C[C@]1(NC(=O)CSc2nc3cc(Cl)cc(Cl)c3[nH]2)CCS(=O)(=O)C1
C[C@H](Cn1cncn1)NC(=O)N1CCC(CCc2ccc(F)cc2F)CC1
C=CC[N+](C)(C)CCN(C)S(=O)(=O)CCCCCCCCCCCCCCCC
Cc1cc(C)cc([C@@H](CC(C)C)NC(=O)c2cc(COc3cccc(F)c3)ccc2CCC(=O)O)c1
CC(C)NCC(O)COc1cccc2[nH]c3ccccc3c12
COc1ccc(-c2cnnn2-c2cc(OC)c3c(c2OC)OCO3)cc1
CC(=O)N1C=Cc2ccccc2[C@H]1CC(=O)OCCOc1ccccc1
Cc1n[nH]c(C)c1CCC(=O)N(C)Cc1cn[nH]c1-c1ccc(F)cc1
O=C(Nc1nc2ccc(F)cc2s1)Nc1ccccc1F
COc1ccc(N2CCN(C(=O)CN3C(=O)COc4ccc(S(=O)(=O)N5CCC(C)CC5)cc43)CC2)cc1
NC(=O)Cc1ccc(NC(=O)CN(Cc2ccc(F)cc2)S(=O)(=O)c2ccc(Cl)cc2)cc1
Cc1ccc(-c2nc3c(cnn3-c3ccccc3)c(=O)n2-c2ccc(C(C)C)cc2)cc1
CC1(C)CC(=O)C2=C(C1)Nc1c(C(=O)Nc3ccccc3)cnn1[C@H]2c1ccc(Cl)cc1
Clc1ccc(C2=NN(c3ccc(/C=C/c4cccc(-c5ncc(-c6ccccc6)o5)c4)cc3)[C@@H](c3ccccc3)C2)cc1
C[C@H]1CCCC[C@H](CCCC(Cl)Cl)c2c(O)cc(cc2O)[C@H](OC(N)=O)[C@@H](C)CCCC[C@H](CCCC(Cl)Cl)c2c(O)cc(cc2O)[C@@H]1O
Fc1ccc(-c2c(-c3ccncc3)[nH]c3cncnc23)cc1
O=C(N/N=C/c1cc(Br)c(O)c(Br)c1O)c1ccc2ccccc2c1O
Cc1c(C)n2c3c(=O)n(C)c(=O)n(C)c3nc2n1C[C@H]1CCCO1
O=C(C[C@H]1C/C=C\CC[C@H](Cc2ccc(F)cc2)C(=O)OC[C@H]2CCCN2C1=O)N[C@H](CO)Cc1ccccc1
CCN1C(=O)[C@@H]2[C@@H](c3ccc(-c4ccc(OC)cc4)c(OC)c3)N3CCC[C@@]3(C(=O)OC)[C@@H]2C1=O
Cc1ccc(C(=O)N2CCN(S(=O)(=O)c3ccccc3[N+](=O)[O-])CC2)o1
COc1ccc2[nH]c(C(=O)N3CCC[C@H]([C@@H]4CC(=O)c5ccccc5O4)C3)cc2c1OC
CCCN1C(=O)N[C@@H](CC(=O)N2CCn3nc(C)cc3C2)C1=O
COc1ccccc1N1CCN(CCCCn2cc(-c3ccc4ncccc4c3)nn2)CC1
COC(=N)NS(=O)(=O)c1ccc([N+](=O)[O-])cc1
CCc1ccc(-c2n[nH]c3nc(-c4ccc(OC)cc4)cc(C(=O)NCc4ccc(C)cc4)c23)cc1
O=C(C1CCCC1)N1CC[C@](O)(COc2ccc(F)cc2)C1
Cc1ccc(S(=O)(=O)N2C[C@H](O)C[C@@H]2C(=O)OCc2ccc(Cl)c(Cl)c2)cc1C
O=C(COc1cc(O)c2c(=O)cc(-c3ccccc3)oc2c1)OCc1cc(-c2ccc(Cl)c(Cl)c2)n(-c2ccc(Cl)cc2)n1
CC(C)(C)[C@@H](NCC(=O)N1CCNC(=O)C1)c1cccs1
COc1ccc(-c2oc3c(=O)cc(C)oc3c2CC(=O)NCCn2cnc3ccccc3c2=O)cc1
O=C(c1ccccn1)N1C[C@@H]2CC[C@H](C1)N(Cc1cnc[nH]1)C2
COc1ccccc1N1CCN(C(=O)CCn2ccc(C)n2)CC1
O=C(N[C@H](Cc1ccccc1)C1CC1)N1CCC(OC2CCCC2)CC1
C[C@@H](Sc1ncnc2nc[nH]c12)C(=O)Nc1sc2c(c1C#N)CCCC2
CC[C@@H](Oc1cc(C)ccc1C)C(=O)NCc1ccccc1C
Cc1ccc([C@@H](CNS(=O)(=O)c2ccc(Cl)cc2)N2CCOCC2)cc1
COc1ccccc1CNC(=O)[C@H]1CC(=O)N(c2ccc(OCC(=O)Nc3cccc(Cl)c3)cc2)C1
O=C(Nc1ccncc1)[C@H]1Cc2ccccc2CN1C(=O)c1ccco1
NC1=C2C(=O)c3ccccc3C(=O)C2=C(N)CC1
Cc1ccc(N2C[C@@H](C(=O)NCCOc3cc(N4CCOCC4)ncn3)CC2=O)cc1C
CC(C)(C)OC(=O)N1CCN(C(=S)SC(C[N+](=O)[O-])c2ccccc2)CC1
CCOC(=O)c1c(-c2ccc(Cl)cc2)nn2c1NCN(CCOC)C2
N#CN/C(=N/C1CC1)Nc1cccc(/C(=C\CCCC(=O)O)c2cccnc2)c1
CC(C)c1cc(C(=O)Nc2cc(Br)ccc2O)no1
Cc1ccc(Oc2ccnc3cc(-c4cnn(C5CCNCC5)c4)ccc23)cc1
CC(C)=Cc1ccc2cc([N+](=O)[O-])ccc2n1
O=C(N[C@@H](Cc1ccccc1)c1ccccc1)c1cc2n(n1)CCN(Cc1cccc(F)c1)C2=O
NCc1cc(NC(=O)[C@@H]2CCc3c[nH]nc3C2)cc(C(F)(F)F)c1
CCCOc1ccc(C[C@H](NC(=O)c2cn(Cc3ccc(-c4ccccc4)cc3)c3ccccc23)C(=O)NS(=O)(=O)c2ccc(Cl)c([N+](=O)[O-])c2)cc1
Cc1cc([N+](=O)[O-])ccc1C(=O)N(C)[C@@H](C)C[S@@](C)=O
CCN(CC)C(=O)[C@@H]1C[C@@H](N)CN1C(=O)CC1=CSC2=NCCN12
CC[C@H](Nc1ccccc1)c1nc(-c2ccccn2)no1
COC(=O)C1SC[C@H]2C(=O)N(c3ccccc3)C(=O)N12
C[C@@H](NC(=O)CNC(=O)c1ccc(N2CCCC2=O)cc1)c1cccc(Cl)c1
COC(=O)Nc1cccc(NC(=O)NC2CCCC2)c1
C[C@H](Cn1cnnn1)n1nnc2cc3c(cc2c1=O)OC1CCCN1C3=O
N/C(=N\O)c1ccc(S(=O)(=O)C2=C(c3ccccc3)OC(c3ccccc3)(c3ccccc3)C2)cc1
CCN(CC)c1ccc(-n2c(C)cc([C@H]3[C@@H](c4ccccn4)NC(=S)N3c3ccc(Oc4ccc(C)cc4)cc3)c2C)cc1
CC(C)(C)OC(=O)NCc1cccc(-n2ccnc2)c1
COc1ccc(CC/N=C2\OCc3ccccc32)cc1OC
NCCCn1ccc(Br)n1
Cc1ccc(NC(=O)COC(=O)c2ccccc2F)cc1S(=O)(=O)N1CCCCC1
COc1ccc2nc(C)cc(N/N=C/c3ccc(O[C@H]4O[C@@H]5O[C@@]6(C)CC[C@H]7[C@H](C)CC[C@@H]([C@H]4C)[C@]75OO6)cc3)c2c1
C[n+]1ccc(/C=C/c2cccs2)cc1
C[C@H]1CN([C@@H](C)CO)C(=O)c2cc(NC(=O)C3CCCCC3)ccc2O[C@H]1CN(C)S(=O)(=O)c1ccccc1
CCOC(=O)CN(Cc1cccc(F)c1)c1ccc2c(c1)N(C)CC(C)(COc1ccc(C(=N)N)cc1)O2
CN(C)[C@@H]1C[C@@H](CO)N(Cc2ccc(Oc3ccccc3)nc2)C1
NC(=O)C1CCN(C(=O)C2CCN(C(=O)Nc3ccccc3)CC2)CC1
COc1ccc2cc(CN3CCC[C@@H](CN4CCOCC4)C3)c(=O)[nH]c2c1
OC(CNCCc1ccccc1)CN1c2ccccc2Sc2ccccc21
O=C(CBr)c1ccccn1
C/C=C(\C)C(=O)O[C@H]1C(C)=C2[C@@H]3OC(=O)[C@@](C)(O)[C@@]3(O)[C@@H](OC(=O)CCC)C[C@](C)(O)[C@H]2[C@@H]1OC(=O)CCCCCCC
CCc1ccc([C@@H](C)NC(=O)Cn2c(=O)c3c(ncn3C)n(C)c2=O)cc1
c1cncc(CC2(Cc3cccnc3)c3ccccc3Oc3ccccc32)c1
C#CC1(NC(=O)NS(=O)(=O)c2ccc(C)cc2)CCCCC1
O=C(Cc1ccc(Cl)cc1)NNC(=O)c1ccco1
CCCn1cnnc1CNC(=O)COc1c(C)ccc(C)c1C
CCOC(=O)NC(=O)c1cn(CC(=O)NCC(=O)NCC(=O)N2CCN(CCn3c(C)nc(C(N)=O)c3N)CC2)c(=O)[nH]c1=O
O=C(c1nc2ccccn2c1CNCCCn1cccn1)N1CCCC1
O=C(Nc1ccc2c(c1)OCO2)c1cc(-c2cccnc2)cnc1NCc1ccc2c(c1)OCO2
COC(=O)C[C@@H]1c2cc(OC)c(OC)cc2CCN1S(=O)(=O)c1ccc(F)cc1
COc1ccc(/C=C/c2nnc(S)[nH]2)cc1OC
O=C(CCCCCCCCc1ccc(O)cc1)c1c(O)cc(O)cc1O
CC(C)NC(=Nc1ccc(Cl)cc1)c1cccnc1
CC(C)c1ccc(CN(C(=O)Cc2coc3ccc(C(C)C)cc23)[C@@H]2CCS(=O)(=O)C2)cc1
Cc1ccc(Cl)cc1N1CCN(c2ccc(C(=O)N[C@H](Cc3c[nH]c4ccccc34)C(=O)Nc3ccncc3)c(F)c2)CC1
Cc1ccc(N(C(C)C(=O)O)S(=O)(=O)c2cccnc2)cc1
COP(=O)(OC)c1nc(/C=C/c2ccccc2)oc1NCc1ccco1
C=CCCCCCCCCC(=O)Nc1ccc(OC)cc1
COC(=O)c1ccc(NC(=O)Cn2cc(-c3ccccc3)c3ncn(C4CC4)c(=O)c32)cc1
O=C(/C=C/c1ccc(-c2cccc(Cl)c2Cl)o1)Nc1ccc(C(=O)O)cc1
CC(OC(=S)Nc1ccc(Cl)cc1)c1cccc2ccccc12
C/C(=N\N(C)S(=O)(=O)c1cc([N+](=O)[O-])ccc1N(C)Cc1ccccn1)c1cnn2ccc(C#N)cc12
CN1CCN(C(=O)c2cc3cc(N(C)S(C)(=O)=O)ccc3s2)CC1
Cc1cccc2c1N(CCOc1ccccc1Cl)C(=O)C2=O
CC(C)n1ccc(C(=O)N2CCCC[C@H]2[C@H](C)N)n1
O=C(Nc1ccc(OC(F)F)c(F)c1)c1ccn(-c2ccc(F)cc2)n1
COc1cc2ncnc(Sc3nccs3)c2cc1OCCN1CCOCC1
Cc1cc(S(=O)(=O)Nc2ccc(Cl)cn2)c(Cl)cc1Cl
CCOc1ccc(-n2c(SCCOc3ccccc3)nnc2-c2ccncc2)cc1
Cc1n[nH]cc1NC(=O)CCCc1c[nH]c2ccccc12
COC[C@@H]1CCCN(C(=O)CCC2CCCC2)C1
Cc1sc(NC(=O)[C@@H]2[C@@H]3C=C[C@@H](C3)[C@@H]2C(=O)O)c(C(=O)NC2CCCCC2)c1C
OC1C[N+]2(CCCCC2)C1
CC1=C(C#N)C(NC(=O)c2ccccc2)(C(F)(F)F)C(=O)N1
C[C@@H](NC(=O)COc1ncnc2sccc12)C12CC3CC(CC(C3)C1)C2
CC(C)C(=O)N1CCC2(CC1)O[C@H](C(=O)Nc1ccccc1)Cn1ccnc12
COc1cccc(NC(=O)COc2cc(C)c(Br)c(C)c2)c1
CCCCCNC(=O)CN(C)S(=O)(=O)c1ccc(OCC)cc1
CCOc1ccccc1C(=O)N(Cc1sccc1C)C1CCS(=O)(=O)C1
COc1ccc2nc(C)cc(N3CCC(NC(=S)Nc4ccc(Cl)cc4)CC3)c2c1
CC(C)(C)c1ccc(CCNC(=O)c2cc3ccccc3[nH]2)cc1
Cc1cc(Cl)cc(Cl)c1CNC(=O)[C@@H]1CNC(=O)N1C
Cc1ccc(Cl)cc1N(CC(=O)N(Cc1ccc(Cl)cc1)[C@@H](Cc1ccccc1)C(=O)NC(C)(C)C)S(C)(=O)=O
O=C(Nc1ccc(F)cc1)c1nc(SCc2ccccc2F)ncc1Cl
N=C(N)c1ccc2scc(C(Cc3ccccc3)C(=O)NC3CCCC[C@H]3C(=O)NCc3ccccc3)c2c1
O=C1c2ccccc2C(=O)N1CCOC(=S)N(C(=O)c1ccc(F)c(F)c1)c1ccc(Cl)cc1
O=C(Cn1cnc2c(F)cc(Br)cc2c1=O)N1CCO[C@H]2CCCC[C@H]21
O=C(CSCc1cc(=O)c2cc(F)ccc2[nH]1)Nc1ccccc1Cl
CCCCCc1ccc(-c2c(C)[nH]c(=O)n2C)cc1
COc1cc(C)c(CNCCc2c[nH]c3ccccc23)cc1C
CCCC[N+](CCCC)(CCCC)CCCC
O=C(c1ccc2cc(Oc3ccc(C(F)(F)F)cn3)ccc2n1)N1CC(c2cccnc2)C1
CN1CCN(C2=C(C(=O)Nc3ccccc3)S(=O)(=O)c3ccccc32)CC1
COc1nc(C)c(NC(=O)c2cccc(F)c2)c(C)n1
O=c1c(Cl)c(/C=C\c2cc(-n3ccnc3)cs2)nc2ccc(Br)cn12
COc1cccc2sc(Nc3nc(-c4ccncc4)cs3)nc12
Cc1ccccc1-c1cc(F)c(Nc2ncccc2C(=O)O)c(F)c1
CC(=O)N1CCC(C(=O)c2cccnc2Oc2ccc(C(=O)c3nc4ccccc4n3C)cc2)CC1
C=C(C)C(=O)OCc1c2ccccc2cc2ccccc12
COc1ccc(-c2cnc(-c3cccc(N)c3)o2)cc1OC
Fc1ccc(-c2csc(N/N=C\c3cccs3)n2)c(F)c1
C=CCc1cc(/C=C/c2onc(C)c2[N+](=O)[O-])cc(OC)c1OCc1ccc(Cl)cc1
CC[C@H](C(=O)NCC(C)C)N(Cc1ccccc1C)C(=O)Cc1ccccc1
CCCCCCCCCCCCCCCC(=O)Nc1ccc([N+](=O)[O-])cc1
COc1cccc(CC(=O)Nc2cc(C)nn2-c2ccc(C)cc2)c1
C[C@@H](NC(=O)[C@H]1CCCN1S(C)(=O)=O)c1cc2ccccc2o1
Cc1cc(C)c2c(=O)n(CC(=O)Nc3ccccc3F)c(=O)n(-c3ccccc3)c2n1
CCCCOC1Oc2ccc(C(Cn3ccnc3)OC(=O)c3ccc(Cl)cc3)cc2N(C)C1=O
Cc1csc(Sc2ccc(NC(=O)N[C@@H]3CCS(=O)(=O)C3)cc2)n1
CC(C)(C)OC(=O)N[C@@H](Cc1ccc(-c2ccccc2)cc1)C(=O)O
O=C1CCCN1Cc1nc([C@@H]2CCOC2)no1
c1ccc(C(c2ccc(CCCN3CCCCC3)cc2)C23CC4CC(CC(C4)C2)C3)cc1
Cc1ccc(-c2nc(NC(=O)c3ccc(OCC(=O)Nc4cccc(C(F)(F)F)c4)cc3)sc2C)cc1C
COc1cccc(CNC(=O)CC[C@@H]2CCCN(C(=O)C3CCOCC3)C2)c1
CC1(C)CC(=O)c2cc(OCc3ccc([N+](=O)[O-])cc3)c(OCc3ccc([N+](=O)[O-])cc3)cc2O1
COc1ccc(CCC(=O)N2c3ccccc3C[C@@H]2C)cc1
CC1(C)CC2=Nc3ccccc3N([C@@H]3OC(=O)c4ccccc43)[C@@H](c3ccc(Cl)cc3)C2=C(O)C1
Cc1cc(C(=O)OCC(=O)N(CC(C)C)c2c(N)n(Cc3ccccc3)c(=O)[nH]c2=O)c(C)o1
Cc1cccc(C(=O)NC(=S)Nc2nc3ccc(N4CCOCC4)cc3s2)c1
COc1ccc(/C=C2/COc3ccccc3C2=O)cc1OC(F)F
CCCO[C@H]1CCCN(Cc2c[nH]nc2-c2cc3ccccc3o2)C1
COC(=O)c1nc(NC(=S)NC(=O)c2cccs2)sc1C
COc1ccc2c(c1)c(CC(=O)NCCCCO)c(C)n2C(=O)c1ccc(Cl)cc1
Cn1ccc(C(=O)N2CCC[C@H](c3nc4ccc(-c5cccnc5)cn4n3)C2)n1
COc1cccc(CNCCc2c[nH]c3ccccc23)c1OCc1ccccc1F
O=C(Nc1nc(-c2ccc(Br)o2)ns1)c1cc(-c2ccc(Cl)cc2)on1
Fc1ccc(CN2CCC3(CC2)CCN(Cc2nccs2)CC3)cc1
Cc1ccc(-n2c(-c3cc4cc(C)ccc4n4nnnc34)nc(-c3ccccc3)c2-c2ccccc2)cc1
Cc1cc(N(C)C)cc(C)c1OCC(=O)N[C@@H](Cc1ccccc1)C[C@H](O)[C@H](Cc1ccccc1)NC(=O)O[C@H]1COC2OCCC21
Fc1ccc(C(OCCOC2CC3CCC(C2)N3)c2ccc(F)cc2)cc1
Cc1cc(C(=O)N(Cc2cccnc2)c2nc3c(Cl)cccc3s2)on1
COc1ccc(C(=O)CSc2nc3ccccc3[nH]2)c(OC)c1OC
COc1ccccc1NS(=O)(=O)c1ccc2oc(SC[C@H]3CCCCO3)nc2c1
CN(CCN(C)c1ccc(N)cc1)c1ccc(N)cc1
COC(=O)c1cc(=O)c2c(OC)cc(OC)cc2n1C
COc1ccc(-c2c(C)nc3c(NCCNC(C)=O)cc(Cl)nn23)cc1S(=O)(=O)N1CCC(O)CC1
Cc1csc2nc(-c3cccs3)cn12
Cc1cccc(CN2C(=O)S/C(=C/c3cccc(OCc4ccccc4F)c3)C2=O)c1
CC(C)(C)c1nc(CC(=O)N2CCC[C@H](n3ccnc3)C2)cs1
CC(=O)NCCc1ccc(C(=O)COC(=O)c2ccccc2SCc2c(C)noc2C)s1
CC(C)[C@@H](Sc1ccccn1)C(=O)NCc1cccnc1
CC(C)(C)n1c(-c2cc(C#N)ccc2C(=O)NC#N)nc2cc(-c3cnc(N)nc3)ccc21
CC(C)CN1C[C@](O)([C@H](CC2CCCCC2)NC(=O)CC(C)(C)C)C[C@H]1C(=O)NC(C)(C)C
COc1ccc(-c2cc(C3CCNCC3)[nH]n2)cc1
Cn1cnnc1Sc1ccc([N+](=O)[O-])cn1
CC(=O)N1CCC([C@H](NC(=O)c2ccc(C)cc2)C(=O)NCC(C)C)CC1
CC1=NS(=O)(=O)N(Cc2ccc(F)cc2F)C=C1C(=O)O
CN(c1ccccc1)S(=O)(=O)c1ccc(C(=O)N2CCc3ccccc3C2)cc1
O=c1cc(-c2ccccc2)oc2c1cc(Br)c1ccccc12
Cc1cccc(/C(=N/O)c2ccc(Cl)cc2)c1O
CS(=O)(=O)N(CCCC(=O)Nc1ccc(OCc2ccccc2)cc1)c1ccccc1
O=C(Nc1ccc2c(c1)OCCO2)c1cccnc1Oc1ccc(Cl)cc1
CCCCN1CCN(C(=O)C2=NN(c3ccc(C)cc3)c3ncccc3S2(=O)=O)CC1
COc1cc2c(cc1-c1c(C)noc1C)[nH]c1nc(C)nc(Nc3cc(C)n(C)n3)c12
Cc1nc(NC(C)c2cccc(OCC(F)(F)F)c2)cc(-c2ccc3ncsc3c2)n1
O=C(NCC(=O)N1CCN(C(c2ccc(F)cc2)c2ccc(F)cc2)CC1)c1ccc(F)cc1
C[C@H](Sc1cccc2cccnc12)C(=O)N1CCCC1
CN1CCC(=O)N(/N=C/c2ccccc2)[C@H]1c1ccccc1
COCCN1CCN(C(=O)CCc2ccnn2C)[C@H]2CS(=O)(=O)C[C@H]21
COc1ccc(/C=C2\CS(=O)(=O)C/C(=C/c3ccc(OC)c(O)c3)C2=O)cc1O
CCCc1c(SC2CCCCC2)c2cc(Cl)ccc2[nH]c1=O
Cc1ccc(CN2C(=O)CC[C@H]2C(=O)N[C@H](C)C(=O)O)cc1
O=C(Nc1ccsc1-c1nc(O)c(O)c(C(=O)O)n1)OCc1cccc2ccccc12
COc1ccc([C@H]2CCCN2CC(=O)N(C)CC(=O)Nc2ccccc2Cl)c(OC)c1
CN1CCc2cc(Br)c(O)cc2C(c2ccc(N/C(S)=N/c3ccc4c(c3)C(=O)OC43c4ccc(O)cc4Oc4cc(O)ccc43)cc2)C1
O=C1N(CC2CC2)CCC[C@]1(O)CNCc1cccc(C(F)(F)F)c1
CNS(=O)(=O)c1ccc(NC(=O)c2cc(N(CC3CC3)C3CCCCC3)ncn2)c(C)c1
O=C(c1cnc2sc3c(n2c1=O)CCCCC3)N1CCN(c2ccccc2F)CC1
COc1ccccc1C1C(C(=O)c2ccccc2)=C(O)C(=O)N1CC(C)C
CCc1nc(N[C@@H]2c3ccccc3C[C@@H]2OCCF)c(CC)nc1Nc1ncc(Cl)cc1Cl
CCc1c(C)sc2nc(SC[C@H]3COc4ccccc4O3)n(-c3ccc(O)cc3C)c(=O)c12
COc1cccc(CN(C(=O)CN(c2cc(Cl)ccc2C)S(=O)(=O)c2ccccc2)[C@H](C)C(=O)NCC(C)C)c1
COCCNC(=O)CN(C(=O)CCC(=O)Nc1ccccn1)c1ccc(C)c(C)c1
CO[C@@]12CC[C@@H](OCCO)C[C@@H]1N(Cc1ccc(F)c(Cl)c1F)CC2
C=CCn1c(SCC(=O)c2ccc(C#N)cc2)nnc1-c1cccc(F)c1
C[C@H]1CN(C(=O)C2CC2)CCN1c1nc2cc(-c3nc(=O)o[nH]3)nc(-c3cncc(Cl)c3)c2n1C[C@H]1CC[C@H](C)CC1
Cc1ccc(C(=O)n2c(-c3ccccc3)cnc2SCC(=O)Nc2ccccc2)cc1
O=C(/C=C/c1ccc(Br)cc1)NC(=S)Nc1ccc(S(=O)(=O)Nc2nccs2)cc1
CC(C)n1cc(-c2ccnc(NC[C@H](C)O)n2)c(-c2cnc3[nH]cc(Cl)c3c2)n1
CCc1ccc(/C=N/NC(=O)c2cc(-c3cccc([N+](=O)[O-])c3)[nH]n2)cc1
CC(=O)c1ccc(N2CCN(CCS(C)(=O)=O)CC2)cc1
CCn1cc2nc(SCC(=O)Nc3ccc(OC)c(Cl)c3)n(Cc3ccccc3)c(=O)c2n1
CCOC(=O)c1cnn(CCNc2cc[nH]c(=O)c2-c2nc3c(C)cc(N4CCOCC4)cc3[nH]2)c1
O=C(/C=C/c1ccc(-c2cc(Cl)cc(Cl)c2)o1)Nc1ccc(-c2nc3cc(Cl)cc(Cl)c3o2)cc1
Fc1ccc(-c2nc(CN3CCOC(Cn4cccn4)C3)co2)cc1
CNC(=O)[C@H]1OC(SC)=NC12CCCC2
CCOc1ccc(N2C(=O)[C@H]3Sc4nc(S)sc4[C@@H](c4cc([N+](=O)[O-])ccc4O)[C@@H]3C2=O)cc1
CN(CC(=O)NCCN1CCOCC1)S(=O)(=O)NCc1cccc(Oc2ccccc2)c1
NC(CC(=O)N1CCC[C@H]1C(=O)NCc1cc(Cl)ccc1OCC(=O)NC1CC1)Cc1ccccc1
O=C(CCNC(=O)c1ccc([N+](=O)[O-])cc1)NCc1cccs1
N#C/C(=C/c1ccccc1Cl)CNC(=S)Nc1ccccc1
Cc1noc(NC(=O)CCNC(=O)c2ccc(Br)cc2)n1
CCC(C)Oc1cc(-c2ccnc(Nc3cccc(Cl)c3)n2)ccn1
COc1ccc(N2C(=O)/C(=C/c3ccc(N4CCCC4)o3)C(O)=NC2=S)cc1
CC[C@@]1(O)CCC[C@@H]2CN(C(=O)c3ccc(-c4ccc(C)cc4)cc3)C[C@@H]21
C[C@H](NC(=O)C1CC(=O)N(c2ccc3c(c2)OCO3)C1)C(=O)NC1CCCCC1
Cc1ccnc(NS(=O)(=O)c2ccc(/N=N\C(C#N)C#N)cc2)n1
CN(C)CC(C)(C)CNS(=O)(=O)c1cccc(Cl)c1Cl
COc1ccc(-n2c(CN3CCN(c4ccccn4)CC3)nc3ccc([N+](=O)[O-])cc3c2=O)c(OC)c1
CNC(=O)[C@H](Cc1ccccc1)N(Cc1ccccc1F)C(=O)CSCc1ccc(OC)cc1
C=CC[C@H]1c2c(cccc2OC)CC[C@H]1N(CCC)CCC
C=CCn1c(SCc2cn(-c3ccccc3)nc2-c2ccc(OC)cc2)nnc1C1CC1
COC(=O)[C@H]1O[C@@H](SNCc2ccc(S(N)(=O)=O)cc2)[C@H](OC(C)=O)[C@@H](OC(C)=O)[C@H]1OC(C)=O
Cc1ccc(/C=N/NC(=O)[C@H](Cc2ccccc2)NS(=O)(=O)c2ccc(C)cc2)cc1
CCOC(=O)C1=C(Nc2ccc(Cl)cc2)S/C(=C\c2cc(C)n(-c3ccc(N4CCCCC4)c([N+](=O)[O-])c3)c2C)C1=O
CC(C)C(=O)Oc1ccc(C(=O)/C=C/c2ccc3c(ccn3C)c2)c2c1C=CC(C)(C)O2
Cc1cc(OC(=O)c2ccc(OCC(CO[N+](=O)[O-])O[N+](=O)[O-])cc2)n(-c2ccccc2)n1
CNC(=O)c1ccc(/C=C/C(=O)NCC(=O)N(C)c2ccc(Cl)c(COc3cccc4c(-n5cccn5)cc(C)nc34)c2Cl)cc1
O=C(CCc1ccccc1)N1CCC[C@@H](c2nc(C3CCOCC3)no2)C1
O=C(Cc1ccccc1)Nc1ccc(CCCCc2nnc(NC(=O)Cc3cccc(OC4COC(c5ccccc5)OC4)c3)s2)nn1
O=C(O)CN(Cc1ccc(C(=O)O)c(C(=O)O)c1)c1cccc2ccccc12
C=CCn1c(SCC(=O)NCCc2ccccc2)nc2cc(C(=O)NC[C@@H]3CCCO3)ccc2c1=O
CCOCCn1nc(C)cc1C(=O)N1CCC[C@H](OCc2cccnc2)C1
CC(C)CN(C[C@@H](O)[C@H](Cc1ccc(OCCN)cc1)NC(=O)O[C@H]1CO[C@H]2OCC[C@@H]12)S(=O)(=O)c1ccc2c(c1)OCO2
O=C([C@H]1C[C@H](Oc2ccc(F)cc2)CN1C1CCC1)N1CCCN(C2CCC2)CC1
COCCOC(=O)/C(C#N)=C(\NCc1ccc(OCc2cnc(Cl)s2)cc1)SC
O=C(O)COC[C@H]1CC[C@@H](COC(=O)N(c2ccccc2)c2ccccc2)CC1
CCOc1ccc([C@H](C)NC(=O)CN(c2ccc(Cl)cc2)S(=O)(=O)c2ccc(OC)cc2)cc1
CCOC(=O)c1ccccc1NC(=O)[C@@H](CC)N(c1ccc(C)cc1)S(C)(=O)=O
O=C(c1cccc(O)c1)c1cccc(-c2ccc(O)cc2)n1
CCOc1ccc([C@@H]2NC(=O)NC(CS(=O)(=O)c3ccc(C)cc3C)=C2C(=O)OC)cc1
c1cncc(CN2CCc3[nH]cnc3[C@@H]2c2cnc(-c3ccco3)nc2)c1
CCCCNC(=O)CN(Cc1ccc(Br)cc1)S(=O)(=O)c1ccc(C)cc1
COc1ccc2cc(C3=CC(=O)CCC3)ccc2c1
CCOc1cc(OCC)c(/C=C2\SC(=O)N(c3ccccc3Cl)C2=O)cc1Br
C=C(Cl)CSc1nnc([C@@H](Cc2ccccc2)NC(=O)c2c(-c3ccccc3)noc2C)n1C
CN1CCN(c2ccc(Nc3ncc4ccc(=O)n(-c5ccccc5)c4n3)cc2)CC1
COc1ccccc1-c1sc(N)nc1-c1ccc(P(=O)(O)O)o1
COc1ccc(CCC(=O)N2CCN(c3ccc(C(F)(F)F)cc3[C@@H](N)CC(C)C)CC2)cc1
CC(C)(C)C1=CC[C@](C)(O)CC1
CCOc1ncccc1C(=O)Nc1nc(-c2ccc3c(c2)CCC(=O)N3)cs1
COc1ccc(-c2sc(Nc3ccccc3)n[n+]2-c2ccc(F)cc2)cc1Br
COCC[C@]1(O)CCN(c2ncc(Cl)cc2F)C[C@H]1C
COC[C@@H](C)NC(=O)Nc1cccn(C)c1=O
N[C@@H]1CCN(C(=O)[C@@H]2CCCCN2S(=O)(=O)c2ccc(Br)cc2)C1
Cc1cc(C)cc(NC(=O)c2nnn(-c3ccc4noc(-c5ccccc5)c4c3)c2C)c1
c1ccc2c(CCCCCN3CCN(C4CCCCC4)CC3)cccc2c1
CC(=O)Oc1cc([C@H]2OC(c3ccc([N+](=O)[O-])cc3)=NN2C(C)=O)cc(OC(C)=O)c1OC(C)=O
O=C(c1ccc2c(=O)n(Cc3ccco3)c(S)nc2c1)N1CCOCC1
CN1CCN(CC(Nc2nc(NC3CC3)n3ncc(/C=C4\NC(=O)NC4=O)c3n2)c2ccccc2)CC1
C=C(C(=O)OCC)C(O)c1ccc(Cl)cc1Cl
CCCCOc1ccc(-c2nn(-c3ccccc3)cc2C2NC(=O)NC(C)=C2C(=O)OCC)cc1
COc1ccc(-n2nnc(C(=O)Nc3cccc(Cl)c3C)c2C)cc1
C=CCN([C@]1(C)CCS(=O)(=O)C1)S(=O)(=O)c1cc(C(=O)O)ccc1C
CCNc1nc(-c2cccnc2)c(-c2ccnc(N3CCOCC3)n2)s1
NC(=O)[C@H]1CCCN(Cc2ccc(F)cc2F)C1
Cc1ccc(NC(=O)COc2ccccc2Br)c(Br)c1
CN1CCN(c2nnc(-c3ccccc3)c3ccccc23)CC1
O=C(c1ccc([N+](=O)[O-])cc1)c1cccc(O[C@@H]2OC[C@@H](O)[C@H](O)[C@H]2O)c1
O=C(Nc1ccc(Cl)cc1)c1ccc2oc(=O)n(Cc3ccccc3)c2c1
Cc1ccc(C(=O)[C@@H](OC(=O)CCNC(=O)CCC(=O)c2cccs2)c2ccc(C)cc2)cc1
COc1cc(OC)cc(C(=O)Nc2ccccc2C(=O)Nc2ccccc2Cl)c1
C=CC(=O)Nc1cccc(Cl)c1Nc1ncc(OCc2cc(OC)cc(OC)c2Cl)cn1
c1coc(-c2cc(-c3ccsc3)nc3c2Cc2ccccc2-3)c1
Cc1cccc2nc(N3CCN(C(CO)c4ccccc4)CC3)c3cccn3c12
COc1ccc(N2CCN(C(=O)c3ccccc3N(C)S(=O)(=O)c3ccccc3)CC2)cc1
COc1ncc(-c2ncnc3sccc23)c(OC)n1
CC(=O)Nc1ccc(CC(=O)N2CC[C@@H](Oc3cccc4cccnc34)C2)cc1
CCC(=O)N(CCOC)CC(=O)N1N=C(c2cccs2)C[C@H]1c1cccc([N+](=O)[O-])c1
CC(=O)Nc1ccc(S(=O)(=O)Nc2cc(C(C)(C)C)c(SC3=C(O)OC(C)(CCc4ccc(O)cc4)CC3=O)cc2C)cc1
Cc1cn([C@H]2C[C@H](n3cc(CNCC(=O)N(Cc4ccccc4)Cc4cc5cc(Cl)ccc5oc4=O)nn3)[C@@H](CO)O2)c(=O)[nH]c1=O
O=C(CCc1nc(Cl)n[nH]1)N1CC[C@@H]2OCc3cnnn3[C@H]2C1
COc1c(O)c(C)cc2c3ccccc3n(Cc3ccc4[nH]c5ccccc5c4c3)c12
O=C(NCc1ccco1)c1cccc(C(=O)NCc2ccco2)n1
[C-]#[N+]c1cccc([C@](C)(CO)NC(=O)c2c(C)nc3c(OCC4CCCCC4)cccn23)c1
C#CCN(C)[C@H](C)Cc1ccc(OCCNc2c3c(nc4ccccc24)CCCC3)cc1
COCCn1c(C(=O)OC)cc2c(=O)n(C)c(=O)n(C)c21
CN(C)CCC1=C(Cc2cccnn2)c2ccc(F)cc2C1
COc1ccc2nc(Oc3ccc(Cl)c(Cl)c3)nc(NCc3ccco3)c2c1
Cc1ccc(CN2C(=O)CSC[C@H]2C(=O)N2CCC[C@@H](CNC(=O)OC(C)(C)C)C2)cc1
NCCC(c1ccccc1)c1ccccc1
O=C(O)c1ccc(C2(NC(=O)c3cccc4ccn(Cc5ccc(C(F)(F)F)cc5)c34)CC2)cc1
NC(CC[S+]([O-])CC(N)C(=O)O)C(=O)O
COc1cc(/C=C/C(=O)N2CCN(Cc3ccc(F)cc3)C[C@H]2C)c(NC(C)=O)cc1Cl
CS(=O)(=O)c1ccc(S(=O)(=O)N(CCc2cccs2)Cc2cccs2)cc1
NC(=O)n1cc(NC(=O)N2CC3(CC3)C[C@H]2C(=O)NCc2cccc(Cl)c2)c2ccccc21
O=C(Nc1nc(-c2ccc(F)cc2)cs1)[C@H]1CCCN1S(=O)(=O)c1ccc(Cl)s1
CCCCCCCCc1ccc(OCC(Cn2ccc3cc(C(=O)O)ccc32)NC(=O)OC)cc1
COc1cc([N+](=O)[O-])ccc1NC(=O)C[n+]1ccccc1C
O=C(O)c1ccc(-c2ccco2)cc1O
COCCCn1c(O)nnc1S[C@@H](C)C(=O)Nc1cccc2ncccc12
C(#Cc1cncc2ccccc12)CCN1CC=C(c2ccccc2)CC1
O=C(O)/C=C\c1ccnc2c(Cl)cccc12
Cc1ccc(-c2csc3ncn(CC(=O)c4ccc(F)cc4)c(=O)c23)s1
CCCN1C[C@@H]2C(=O)CC[C@H]1CN2Cc1ccc(OC)cc1
c1ccc2cc(C3CN4CCSC4=N3)ccc2c1
O=C(CNc1ccccc1[N+](=O)[O-])N[C@H]1CCC[C@H]1n1ccnc1
COc1cccc(CN2CCC[C@H]2C[C@H](O)c2cnn(C)c2)c1F
N#Cc1ccc(C(=O)/C=C\c2ccc(F)c(F)c2)cc1
CN(Cc1cnc2ccccc2n1)C(=O)[C@@H]1CCC(=O)N(Cc2ccccn2)C1
N#Cc1ccc(S(=O)(=O)N2CC[C@H]3[C@H](C2)OCc2cnnn23)c(Cl)c1
O=C(CC1CCCCC1)Nc1nc2ccc(C(F)(F)F)cc2s1
CN1CCN([C@H]2CCc3ccccc32)CC1
C=C1[C@H]2C[C@H]2[C@]2(C)C[C@@]3(O)OC(=O)C(C)=C3[C@H](OC)[C@H]12
CC(C)(C)CNC(=O)Nc1cccnc1
CCOc1ccc(NC2=C(C(=O)c3ccccc3)C(c3ccc(Br)cc3)N(CCCn3ccnc3)C2=O)cc1
COc1cc(CN2C[C@H]3CC=CC[C@@H]3C2)cc(OC)c1OC
COc1ccc(NC(=O)CN(c2cccc(OC(C)C)c2)S(C)(=O)=O)cc1
Cc1c2cc(NC(=O)NCCNC(=O)Nc3ccc4c(c3)c(C)[n+](C)c3ccccc43)ccc2c2ccccc2[n+]1C
COc1ccc(C(=O)Cn2nnc(-c3ccccc3NC(=O)COc3ccc(C)cc3)n2)cc1
Cc1cc(C)n(CC(=O)NC2C(=O)N3C(C(=O)O)=C(CSc4nnc(C)s4)CSC23)n1
Cc1c(CN2CCC(Nc3ncnc4sc(CC(F)(F)F)cc34)CC2)ccc2c1cc(C#N)n2CC(N)=O
Cc1ccc(/N=C/c2c(OCc3ccc(C(=O)O)cc3)ccc3ccccc23)cc1Cl
CS/C(=N/C(C)(C)C)Nc1ccccc1Cl
NC(=O)c1ccc2c(CCC3CCN(Cc4ccccc4)CC3)noc2c1
O=S(=O)(O)c1cc(S(=O)(=O)O)c2cc(OS(=O)(=O)c3cccc4c(S(=O)(=O)Oc5ccc6cc(S(=O)(=O)O)cc(S(=O)(=O)O)c6c5)cccc34)ccc2c1
Cc1cc(Cl)cc(C)c1Oc1nn(Nc2ccc(Cl)cc2)c(=O)c2ccccc12
Cc1ccc(O)c(NC(=O)c2ccc([N+](=O)[O-])cc2Cl)c1
CN(C(=O)C1CCN(C(=O)c2ccc(Cl)cc2)CC1)[C@H]1C[C@H]2CNC(=O)C[C@H]2C1
COc1cc(C(=O)Nc2c(C(=O)N3CCOCC3)oc3ccccc23)cc(OC)c1OC
O=C(Nc1ccc(Br)c(Cl)c1)c1sc2ccccc2c1Cl
O=C(NC1CCCCCC1)c1ccc(Sc2ccc(F)cc2)c([N+](=O)[O-])c1
COc1ccc(NC(=O)Cn2cc(C#N)c3ccccc32)cc1
O=C(O)[C@H]1C[C@@H](O)CN1[C@H]1CCCC[C@H]1O
Cn1c(CN2CC[C@@H](c3[nH]ncc3S(C)(=O)=O)C2)nc2ccccc21
COc1ccc(O[C@@H]2O[C@H](COC(C)=O)[C@@H](OC(C)=O)[C@H](OC(C)=O)[C@@H]2OC(C)=O)cc1
Cc1nc2ccc(CNc3nnc(CCc4ccccc4)o3)cc2s1
CC(=O)O[C@@H]1CC[C@]2(C)[C@@H]3CC[C@]4(C)[C@H]([C@H](C)CCCC(C)C)CC[C@@H]4[C@@H]3C[C@@H](OC(C)=O)[C@@]2(O)C1
CC(=O)N(O)CC(Cc1ccccc1)C(=O)N[C@@H](CC(C)C)C(=O)N[C@@H](Cc1ccccc1)C(=O)O
COc1ccc(CN2CCc3c(c(C(=O)N(C)C)nn3CCC(F)(F)F)C2)c(OC)c1C
CC[C@@H](C)CN(CC(=O)N(Cc1ccc(F)cc1)Cc1ccc(C)s1)C(=O)Nc1ccccc1
O=C(Nc1ccc(Cl)cc1C(F)(F)F)[C@H](c1ccccc1)N1CCCCC1
S=C1N[C@@H](c2ccccn2)[C@H](c2ccc(Br)s2)N1c1ccccc1
CN[C@H](Cc1ccccc1)C(=O)N1CCC[C@H]1C(=O)N[C@@H](Cc1ccc(C(=N)N)cc1)C(=O)c1nc2ccccc2s1
C=CC[C@@H](CC)NC(=O)Nc1ccc(OC)c(NS(C)(=O)=O)c1
CC(=O)O[C@@H]1C=CC[C@@H]2C(=O)C3=C(C(=O)c4ccccc4C3=O)C(=O)[C@@H]21
CN1CCN(CCCNC(=O)C(c2ccccc2)c2ccccc2)CC1
CC1=N/C(=C\c2ccc3ccccc3c2)C(=O)O1
C=CCN1C(=O)C(=Cc2ccc(OC)cc2)C(=O)N(CC=C)C1=O
CC(C)COC(=O)c1cc([N+](=O)[O-])cc2c1-c1ccc([N+](=O)[O-])cc1C2=O
CC(C)COc1ccc(S(=O)(=O)Nc2ccc3c(c2)C(=O)N(C)CCO3)cc1
N#C[C@@H]1C[C@H]1c1cccc2nc(Cn3nc(C(F)(F)F)cc3Cl)cc(=O)n12
CCOc1cc([C@@H]2NC(=O)NC(C)=C2C(=O)OC)ccc1OC[C@@H](O)N/N=C\c1cc(Br)c(OCc2ccc(Cl)c(Cl)c2)c(OCC)c1
CCN(CC)S(=O)(=O)N(C)Cc1cc(NC)nc([C@H]2CCCN2C(C)=O)n1
Cc1cc(NC(=O)CCn2c(CCCO)nc3ccccc32)no1
CN(C)CCOCc1cncc2c1CCN([C@H]1CCOC1)C2
CCN(C[C@H]1N[C@@](CC)(C(=O)OC)[C@H]2C(=O)N(C)C(=O)[C@@H]12)C(=O)C1CCCCC1
C[C@@H](NC(=O)Cc1ccccc1Cl)c1ccc2c(c1)OCCO2
Cc1cccc(C)c1NC(=O)CNC(=O)[C@@H]1CC(=O)N(c2ccccc2Cl)C1
CC[C@@H](Nc1nc2c(cnn2C)c(=O)[nH]1)c1ccc(Cl)cc1
C/C(=N\NC(=S)N1CCC(Cc2ccccc2)CC1)c1c(O)ccc2ccc(=O)oc12
CN1CCCN(Cc2cccc(-c3ccc(CNC(=O)c4cccc(Cl)c4)c(F)c3)c2)CC1
CCOc1ccccc1CCCNC(=O)CN(c1cccc(C(F)(F)F)c1)S(=O)(=O)c1ccc(C)cc1
Nc1ccccc1Sc1cc(=O)[nH]c2c([N+](=O)[O-])cccc12
N#CCc1ccc(NC(=O)N(Cc2cccnc2)Cc2ccco2)cc1
O=C(CCc1nc2ccccc2[nH]1)[C@@H]1Cc2ccccc2C1=O
COCCn1c(-c2ccc(F)cc2)cnc1SCC(=O)Nc1ccc(S(=O)(=O)N2CCCCC2)cc1
Cc1ncc(C(=O)N2CCC[C@H](c3nccn3CCN(C)C)C2)cn1
CC(=O)N[C@@H]1[C@@H](NC(=N)N)C=C(C(=O)O)O[C@H]1C(=O)NCCN
COc1ccc(CC(=O)N2CC3(C[C@@H](OC)CCO3)C2)cc1
CCOC(=O)c1cccc(-n2cc(C(=O)c3ccccc3N)nn2)c1
CCc1nc(NC(=O)N[C@@H](CO)Cc2c[nH]c3ccccc23)sc1C
COc1ccc(/C=C\c2ccncn2)c(Cl)c1OC
Cc1sc(NC(=O)c2ccco2)c(C(c2cccnc2)N2CCN(C)CC2)c1C
CC(=O)c1ccc(N2CCN(C(=O)c3cc4c(-c5ccccc5F)nn(C)c4s3)CC2)cc1
OCCCCCCN1CCO[C@H](c2ccc(Cl)c(Cl)c2)C1
CC[C@@H](C)c1ccc(-c2csc(CN3C(=O)c4ccccc4S3(=O)=O)n2)cc1
CCC(=O)NCCCc1cc(OC)ccc1CCc1cccc(OC)c1
O=[N+]([O-])c1ccc(OCc2nccs2)c(Cl)c1
CC(C)CCOc1ccc(S(=O)(=O)N[C@H](C)c2nnnn2C2CC2)cc1
Brc1c(CSc2nncn2-c2ccccc2)nc2ncccn12
C[C@H](NC(=O)c1cc(Cl)ccc1Cl)[C@H]1CCCO1
Cc1cn(-c2ccccc2Cl)nc1C(=O)N(c1ccccn1)C1CCCC1
Cc1c(CCNC(=O)c2ccc(Br)o2)sc2nc(-c3ccc(F)cc3)nn12
Cc1cncc(C(=O)Oc2ccc3nccnc3c2)c1
COCCN1CCN(Cc2ccc(C#N)cc2F)CC1
COc1cc(NC(=O)C(=O)Nc2ccccc2)ccc1-c1cnco1
O=C(OCc1ccc([N+](=O)[O-])cc1)c1cccc(N2C(=O)c3cc(Cl)c(Cl)cc3C2=O)c1
NC(=O)c1nn(CC(=O)N2[C@H](C(=O)Nc3cccc(Br)n3)C[C@H]3C[C@H]32)c2cnc(CF)cc12
CCc1cccc(CC)c1NC(=O)[C@H]1CCCN(S(=O)(=O)c2ccc(OC)cc2)C1
C[C@H]1CCCC[C@H](CCCC(Cl)Cl)c2c(O)cc(cc2O)[C@H](O)[C@@H](C)CCCC[C@H](CCCC(Cl)Cl)c2c(O)cc(cc2O)C1
COc1cncc(C=Cc2ccncc2)c1
O=c1cccccc1N1CCN(CCc2ccc(F)cc2)CC1
O=C1CN(C(=O)CNC(CC(F)(F)F)c2ccc(F)cc2)CCN1
Cc1ccc(N(CC(=O)Nc2ccc3c(c2)OCCO3)S(=O)(=O)c2c(C)n[nH]c2C)cc1
O=C(CN1CCN(c2ccccc2)CC1)Nc1ccc(-n2cnnn2)cc1
CCc1cc(Oc2cccnc2)c(S(C)(=O)=O)cc1C(=O)N=C(N)N
COCCn1cc(S(=O)(=O)N2CCC[C@H]3CCCC[C@H]32)cn1
CC(C)NC(=O)[C@H](C)Oc1ccc2c(c1)[C@H](c1ccccc1)N(Cc1ccccc1F)CC2
O=c1[nH]c(=O)n([C@H]2O[C@@H](CO)[C@H](O)[C@@H]2F)cc1/C=C/Br
CC(=O)NC1(C(=O)O)CCN(c2nc3ccccc3n([C@@H]3C[C@@H]4CC[C@H](C3)N4C3CCCCCCC3)c2=O)CC1
C=CCc1cc(C2C3=C(CCCC3=O)NC3=C2C(=O)CCC3)cc(OCC)c1OS(=O)(=O)c1ccc(C)cc1
O=C(c1ccc(N2C(=O)C3C4c5ccccc5C(c5ccccc54)C3C2=O)cc1)C(Br)Br
COc1cccc(Cn2ccc3ccc(-c4ccc5ccn(Cc6cccc(C(=O)O)c6)c5c4)cc32)c1
CC1(c2ccccc2)CC(c2cccc([N+](=O)[O-])c2)=NO1
COc1ccc(/C=C2\CCC/C(=C\c3ccc(OC)c(F)c3)C2=O)cc1F
CCc1nc(CNC(=O)CCc2cc(OC)ccc2OC)cs1
CSc1ccc(/C=C2/CCn3c2nc2sc(C(=O)O)c(C)c2c3=O)cc1
C[C@@H]1Cc2ccccc2N1C(=O)[C@@H](C)N(c1ccc(F)c(F)c1)S(C)(=O)=O
O=C(c1occ2c1CCC2)N1CCc2ccccc2[C@@H]1CO
C[C@@H](C(=O)O)c1cccc2c1sc1ccccc12
CCC/C(=N/Cc1ccccc1)C1=C(O)C(C(=O)OC)C(C)(C)CC1=O
COc1cccc(NC(=O)c2cccnc2N2CCN[C@@H](c3ccccc3)C2)c1
COc1cc(/C=C/C(O)=C/C(=O)/C=C/c2ccc(OCCCF)c(OC)c2)ccc1O
COc1cc2c3cnn(CN4CCCC4)c(=O)c3n(C)c2cc1OC
CN(C)CCCN(C(=O)c1ccc(C(=O)c2ccccc2)cc1)c1nc2c(F)cccc2s1
CC(C)(CNC(=O)c1ccc2[nH]nnc2c1)NCC(=O)N1C[C@@H](F)C[C@H]1C#N
CSC1=NSC2=NC(=O)/C(=C\c3ccc(C)o3)C(=N)N12
CCc1c(O)n(-c2ccccc2)c(SCC(=O)NC(C)(C)C)nc1=O
C[C@H](NC(=O)[C@@H](CC(=O)OC(C)(C)C)NC(=O)OCc1ccccc1)C(=O)NC(c1ccc(C(=N)N)cc1)P(=O)(Oc1ccccc1)Oc1ccccc1
CCCCCCCCCCCCCC[N+](C)(C)Cc1ccc(OC)c(OC)c1
NS(=O)(=O)c1cc(C(=O)NCCc2ccc3c(c2)OCCO3)ccc1Cl
Cc1oc2c(CN(C)C)c(O)ccc2c(=O)c1Oc1ccccc1Br
CCCCCCCCCCCCCCCC[N+](C)(C)Cc1ccc(C[N+](C)(C)CCCCCCCCCCCCCCCC)cc1
COc1ccc2[nH]cc(SC3CCN(C)CC3)c2c1
CN1CCN(c2cc(-c3ccco3)nc(Cl)n2)CC1
O=[N+]([O-])c1cccc(CS(=O)(=O)NCCc2ccc(F)cc2)c1
COc1ccc(CCNC(=O)[C@@H](C)SCC(=O)Nc2ccc(F)cc2)cc1
Cn1cc(-c2nnn3c2CO[C@H](CNCc2ccccn2)C3)cn1
O=C(O)c1ccc(-c2ccc(-n3ccnc3)cc2)c(C(F)(F)F)c1
CCC[C@@H](NC(=O)N(Cc1ccncc1)C1CCCCC1)C(=O)O
C/C(=C\c1ccccc1)C(=O)OCC(O)CO
CC(C)CNS(=O)(=O)c1ccc(CCC(=O)NCCCOC(C)C)cc1
C[C@@H]1C[C@@H](C)CN(CCCNC(=S)Nc2ccc(Cl)cc2)C1
Nc1cc(Cl)ccc1C(=O)OCC(=O)NCC1CCCO1
C=C(CC[C@@H](C)[C@H]1CC[C@@]2(C)C3=C(C(=O)C[C@]12C)[C@@]1(C)CC[C@H](O)[C@@H](C)[C@@H]1CC3)C(C)C
CS[C@@H]1CCC[C@@H]1NC(=O)N[C@@H]1CCN(c2cnn(C)c2)C1
COC(=O)c1ccc(COC(=O)C2CCN(S(=O)(=O)c3c(C)cc(C)cc3C)CC2)o1
N[C@H](C(=O)N1CCCC1)[C@H]1CC[C@H](O)C1
CCOc1cc(CN[C@@H](C)c2ccc(-n3ccnc3)cc2)ccc1OCCOc1ccc(F)cc1
O=C(CSc1ncc(S(=O)(=O)c2ccc(Cl)cc2)c(=O)[nH]1)Nc1cccc(C(F)(F)F)c1
COc1ccc(/C=C/C(=O)OCC(=O)N2CCc3ccccc32)c(OC)c1
COc1cc([C@@H]2c3cc4c(cc3C[C@H]3COC(=O)[C@@H]32)OCO4)cc(OC)c1OC(=O)Cc1ccccc1
CC1(C)Cc2c(c(N3CCOCC3)nc3sc4c(NCc5cccnc5)ncnc4c23)CO1
O=C(O)Cc1ccc(OCC(F)(F)F)c(-c2ccc(F)c3c2CN(C(=O)CC2CCOc4ccccc42)CC3)c1
CCNC(=O)N1CCC(NC(=O)c2ccnc(C(C)C)n2)CC1
COCCCn1c(C)cc(O)c([C@H](CC(=O)OC)c2ccc(-c3ccc(C(=O)OC)cc3)o2)c1=O
CCN1CCN([C@H]2CCc3c(c(C(=O)N4CCc5ccccc5C4)nn3C)C2)CC1
Cc1ccc(NC(=O)Cc2c(C)nc3c(c2C)c(=O)[nH]n3C)cc1F
Cc1cn2c(-c3cn[nH]c3)cnc2c(Nc2cc(C(C)N3CCOC(C)(C)C3)ns2)n1
COc1ccc(C2=N[C@@H](c3ccc(Cl)cc3)[C@@H](c3ccc(Cl)cc3)N2C(=O)N2CCN(C(C)=O)CC2)c(OC(C)C)c1
COC1(OC)CC2CN(C)CC21c1ccc(C)cc1
CCN1CCO[C@@H](C(=O)NCc2ccc(C(=O)N3CCCCC3)cc2)C1
CCN1CCN(Cc2nc(CC(C)C)no2)CC1
CN(C)c1ccc2c3c(cccc13)C(=O)N(C1CCCCC1)C2=O
O=C1CC[C@H](N2CC(c3ccncc3)C2)CCN1CC1CC1
Cc1ccc(CN2CCC(NC(=O)c3scnc3C)CC2)cc1
CN(C)c1ncc(CNCCc2cn3ccccc3n2)s1
Cc1ccc(CN2CC[C@@]3(CCN(Cc4cccc(F)c4)C3=O)C2)o1
CN(CCO)CC(=O)NC1CCCC1
CC(=O)NCc1ccc([C@@H]2CCCN2c2nc3ccccn3c2C#N)o1
Nc1nc(N)nc(-c2ccc(Oc3ccccc3N)cc2)n1
Cc1ccc(-c2noc(-c3cccnc3N3CCC(C(=O)NC4CCCCCC4)CC3)n2)cc1
Nc1ccc(OC23CC4CC(CC(C4)C2)C3)c(F)c1
COC[C@H](O)CN(Cc1c(-c2ccccc2)nn(C)c1Oc1cccc(OC)c1)CC1CC1
COc1ccccc1Cc1cc(C(=O)N2CCC[C@H](c3cncc(-c4nc(C)c[nH]4)n3)C2)ccn1
CCc1ccc(-n2c(SCc3ccccc3F)nc3ccccc3c2=O)cc1
O=C(C=C(C1CC1)C1CC1)Nc1cccc(N2CCCC2=O)c1
Cc1cc([C@@H]2CCCCN2Cc2cc(-c3cccnc3)no2)no1
NCCCCN(Cc1ccccn1)C[C@H]1Cc2ccccc2CN1
O=C(CNC(=O)c1cc(O)c(O)c(O)c1)Nc1ccc(Oc2cccc(NC(=O)CNC(=O)c3cc(O)c(O)c(O)c3)c2)cc1
COc1ccc(Cl)cc1C1(F)C(=O)Nc2cc(C(F)(F)F)ccc21
COC(=O)C[C@]1(NC(=O)c2cc(C(=O)OC)cc([N+](=O)[O-])c2)CCCOC1
O=C(Nc1ccc2[nH]c(C(=O)N3C[C@H](CCl)c4c3cc3oc(=O)[nH]c5cccc4c53)cc2c1)c1cc2ccccc2[nH]1
O=S(=O)(c1ccc(C(F)(F)F)nc1)N1[C@H](C2CC2)c2cn[nH]c2C(F)(F)[C@H]1C1CC1
CCN(CC)c1cc(C)c2cc(NC(=O)c3cc(OC)cc(OC)c3)ccc2n1
Cc1ccc(Cn2c(CN3CCC(C(=O)O)CC3)cc3ccccc32)cc1
N=C(N)NCCc1cn(Cc2ccccc2)c2ccccc12
COc1ccccc1OCCC(=N)N
Cc1cc(C(=O)Nc2ccc(C)c3ncccc23)c([N+](=O)[O-])c(O)n1
CC(=O)/C=C/c1c(-c2cccc3cc[nH]c23)cc(C)c2c1[C@H](C)[C@@H](O)C(C)(C)N2
C[C@H](NC(=O)c1ccccc1OC1CCC1)[C@H]1CCCN(C(=O)OC(C)(C)C)C1
CC(C)C[C@H](NC(=O)[C@@H](NC(=O)[C@@H](N)CNC(=O)c1cc(O)ccc1O)C(C)C)C(=O)N[C@@H](Cc1ccccc1)[C@@H](O)C(=O)NC(C)(C)c1ccccc1
CN(Cc1nc(-c2ccccc2)c[nH]1)C(=O)NCC(=O)NC(C)(C)C
CCO[C@H]1C[C@H]1NC(=O)Cc1c(C)noc1C
COC(=O)c1cc(S(=O)(=O)NCC#N)c(F)cc1C
CC(C)(C)CNC(=O)C[C@H](NC(=O)N1CCC(C(=O)Nc2cccnc2)CC1)C(=O)N[C@@H](CCc1ccccc1)C(=O)NCc1ccccc1Cl
O/N=C1/C2C3CC4C5C3C1C5C1(OCCO1)C42
O=C1[C@H]2C3c4ccccc4C(c4ccccc43)[C@H]2C(=O)N1c1ccc(Br)cc1[N+](=O)[O-]
O=C(Cc1ccccc1F)Nc1ccccc1C(=O)N1CCOCC1
CC(=O)Nc1ccc(C(=O)O[C@@H]2CCOC2=O)cc1
Cc1nn2c(S(=O)(=O)NCc3ccc4c(c3)OCO4)c(C)nc2s1
COc1ccccc1N1CCN(C[C@H]2CN=C3c4ccccc4N=C(SC)N32)CC1
Cc1n[nH]c(=O)c(C(=O)Nc2ccc(F)cc2F)c1C
CCc1ccccc1NC(=O)CCCN(c1ccccc1C)S(C)(=O)=O
CCCCNC(=O)NS(=O)(=O)c1ccc(-n2nc(C)c(Br)c2C)cc1
C=CCn1c(CNc2ccccc2)nnc1Sc1nc2c([nH]1)c(=O)n(C)c(=O)n2C
O=C(NCCN1CCN(C(=O)c2cc3ccccc3oc2=O)CC1)c1cc2ccccc2oc1=O
CCc1ccc(/C=c2\sc3nc(-c4cc(OC)c(OC)c(OC)c4)nn3c2=O)cc1
Cc1noc(C)c1[C@H](C)CNC(=O)N1CCCCC[C@H]1c1ccco1
Cc1cnn(C[C@@H]2CCCN2C(=O)[C@@H]2COc3ccccc3C2)c1
O=C(O)CN([C@H]1CS(=O)(=O)C[C@H]1O)S(=O)(=O)c1ccc2ccccc2c1
COc1ccc(OCCNC(=O)[C@@H]2CN(S(=O)(=O)c3ccccc3)c3cc(Cl)ccc3O2)cc1
C[C@@H]1CN([C@H](C)CO)C(=O)c2cccc(NC(=O)c3nc4ccccc4s3)c2O[C@H]1CN(C)S(=O)(=O)c1ccc(Cl)cc1
O=C(NC(=S)Nc1ccc(N2CCN(Cc3ccccc3)CC2)cc1)c1ccc(N2CCCC2)c([N+](=O)[O-])c1
CC(C)[C@@H](C#N)NC(=O)c1cc2ccccc2c(=O)[nH]1
COc1ccc(-c2nc(Nc3ccc(CCO)cc3)ncc2C#N)cc1
CNCc1ccccc1Sc1ccc(CO)cc1N
Cc1ccc(-n2nc(C)cc2NC(=O)Cn2nc(-c3cccs3)oc2=O)cc1
CC1(C)C=Cc2c(ccc3c2O[C@H](c2ccc4c(c2)OCO4)CC3=O)O1
O=C(Nc1ncc2ccccc2n1)c1cccs1
CN(CCN1CCCCCC1)C(=O)Nc1ccc(F)cc1Cl
CNC(=O)[C@@H]1CCCN1Cc1nc(-c2ccc(Br)s2)no1
Cc1nc(Cc2cccc(C(F)(F)F)c2)sc1-c1ccc(C(N)=O)c(C(F)(F)F)c1
Cc1cc(O)cc(=O)n1Cc1ccccc1
CC(=O)C(C(c1ccccc1)N1CCOCC1)N1CCOCC1
CCCN(CCC)C(=O)[C@@H]1OC(C(=O)O)=C[C@H](N)[C@H]1NC(=O)C(F)(F)F
Cc1cc(OC2CN(C(=O)c3ccsc3)C2)n2ncnc2n1
COc1cc(C=Nn2c(-c3cc4ccccc4o3)nc3ccccc3c2=O)cc(OC)c1OC(C)=O
Fc1cccc(-n2cc(CN[C@@H]3CCCc4c3cnn4-c3ccccc3F)cn2)c1
COc1ccccc1C(=O)CSc1n[nH]c(N)n1
CC[C@@H](NC(=O)c1cc(C(=O)N2CCC[C@@H]2C(C)O)n2c1COCC2)c1ccccc1
Cc1cccc(Oc2ccc(NC(=O)CSc3nnc(-c4ccc(F)cc4)n3C)cc2)c1
CC1=C[C@H]2O[C@@H]3[C@H](O)C[C@@H](O)[C@](C)([C@@]2(CO)CC1)[C@@]31CO1
COc1ccc(-c2c(C#N)c(N)nc(SCc3csc(-c4ccccc4)n3)c2C#N)cc1
COc1ccc2c(O[C@@H]3C[C@H]4C(=O)N[C@]5(C(=O)NS(=O)(=O)C6CC6)C[C@H]5/C=C\CCCCC[C@H](N5CCCC5=O)C(=O)N4C3)cc(-c3nc(C4CC4)cs3)nc2c1C
CCOc1ccc(Br)cc1S(=O)(=O)/N=C(\c1ccccc1)N1CCCC1
CCOC(=O)c1csc(N)c1-c1ccc([N+](=O)[O-])cc1
C=C[C@@H]1C[C@]1(NC(=O)C(c1ccccc1)n1c(C)c(Cl)nc(NC(=O)OC(C)(C)C)c1=O)C(=O)O
COc1ccc2c(c1)Cn1c-2cc2ccc(C)cc2c1=O
CCS(=O)(=O)N1CCc2nnc(CN(C)C(C)C)n2CC1
COc1ccccc1-n1c(C[C@H]2C(=O)N(C)c3ccccc32)nc2ccccc2c1=O
Cc1ccc(CN2CCN(Cc3c[nH]nc3C3CCCCC3)CC2CCO)cc1
COc1cc(NC(C)CCCNC(=O)NC(=O)NCCCC(C)Nc2cc(OC)cc3cccnc23)c2ncccc2c1
O=C(CSc1nnc(-c2ccccc2)c(-c2ccccc2)n1)c1cc([N+](=O)[O-])cs1
Cc1cccc(N(C)S(=O)(=O)c2c(-c3cccc(F)c3)csc2C(=O)NCc2ccccn2)c1
COc1cc(C(=O)N2CCN(c3ccc([N+](=O)[O-])cc3)CC2)ccc1OCc1c(C)noc1C
Cc1cc(C)nc(CCNC(=O)N2C[C@H]3C[C@H](O)[C@@H](O)C[C@H]3C2)n1
O=C(Nc1ccc(-c2ccc(C(=O)[C@@H]3CCC[C@H]3C(=O)O)cc2)cc1)Nc1ccc(C(F)(F)F)cc1
Cc1ccc2nc(Sc3ccc(Cl)cc3)c(-c3c(C#N)c(N)nc(Sc4ccccc4)c3C#N)cc2c1
CCOc1ccc(N2C(=O)C[C@H](SC(=N)N/N=C(\C)c3ccc(OC)cc3)C2=O)cc1
O=C1NC[C@H](c2ccc(F)cc2)Cc2[nH]c(-c3noc(-c4ccco4)n3)nc21
C[C@H](Sc1ccc(Cl)cc1)C(=O)Nc1ccc(-n2cnnn2)cc1
CCOc1ccnc(N2CCN(C(=O)c3c(CC)noc3C)CC2)n1
CNC(=O)c1nc(C2CC2)ccc1NC(=O)c1nc(C2CC2)cnc1Nc1cncnc1
COc1ncccc1C(=O)N1CCCC[C@@H]1c1cc(C)n2nccc2n1
CN1CCCN(S(=O)(=O)c2cccnc2)c2cc(F)ccc21
CC(=O)N(C)CC(=O)N[C@H](c1cccc(C(F)(F)F)c1)C(C)C
COc1cccc(CN(C)C(=O)Cn2cc([N+](=O)[O-])ccc2=O)c1
Cc1c(Cc2ccccc2)c(=O)oc2c3c(cc(OCC(=O)NCCN4C[C@@H]5C[C@H](C4)Cn4c5cccc4=O)c12)OC(C)(C)CC3
O=c1c2ccccc2nc(-c2cc3cc(Br)ccc3o2)n1N=Cc1cccc([N+](=O)[O-])c1OCc1ccc(F)cc1
OC(c1ccccc1)C(NCc1ccccc1)c1ccccc1
Cc1c(Cl)cccc1-n1c(C)cn2c3c(=O)n(CCN4CCOCC4)c(=O)n(C)c3nc12
CCc1ccsc1C(=O)N(Cc1cccc(OC)c1)C[C@H]1CCCO1
CCOC(=O)c1c(N)sc(C(=O)N2CCCCCC2)c1C
CC(NS(=O)(=O)/C=C/c1ccccc1)C(=O)NCCc1ccc(S(N)(=O)=O)cc1
N[C@H]1[C@@H]2CN(c3c(F)cc(N4C[C@H](CNC(=O)C(F)F)OC4=O)cc3F)C[C@H]12
CSCC[C@H](NC(=O)c1ccc(COCc2ccc(-c3ccc(C(C)=O)cc3)o2)cc1-c1ccccc1C)C(=O)O
COc1cc(-c2cc3c(c(=O)o2)C[C@]2(O)[C@@]4(C)C(=O)[C@H]5O[C@H]5C(C)(C)[C@]4(O)CC[C@@]2(C)O3)cc(OC)c1OC
CN1CCC(c2cc3c(-c4cccc(NCCSc5ccccc5)n4)ccnc3[nH]2)CC1
N#Cc1cnn2c(NC3CCCC3)c(-c3ccc(Cl)cc3)[nH]c12
Cc1cc(NC(=O)NCc2ccc3c(c2)OCO3)no1
Cn1cc(C(F)(F)F)nc1-c1ccc(Oc2ccc(S(=O)(=O)Nc3nccs3)cc2C#N)cc1
CC(C)CCN(CCC(C)C)CC(=O)Nc1ccc(S(=O)(=O)c2ccc(NC(=O)CN(CCC(C)C)CCC(C)C)cc2)cc1
CCNC(=S)Nc1nc(N2CCC(C)CC2)cc(N2CCC[C@@H](C)C2)n1
COc1ccc(NC(=O)NCCCOc2cccc(CN3CCCCC3)c2)cc1
COc1cccc(NC(=O)N2CCCC2C(=O)NC2CCCC2)c1
CS(=O)(=O)Nc1cccc(-c2cnc(N)c(-c3ccc(C(=O)N4CCOCC4)cc3)n2)c1
CCCC1CN(C(=O)C(=O)c2c[nH]c3cccc(F)c23)CCN1C(=O)c1ccccc1
O=C(O)c1cc(S(=O)(=O)Nc2ccccc2F)ccc1F
N#C/C(=C\c1c[nH]c2ccccc12)c1n[nH]c(N)c1C#N
Cc1noc(C)c1CCc1nc(COc2cccc(Cl)c2)n[nH]1
COc1cc([C@@H]2CC(=O)Nc3c2c(C)nn3-c2nc3ccccc3s2)ccc1OCC(N)=O
C=C1C(=O)O[C@H]2[C@H]1C[C@H](OC(=O)Nc1cccc3ccccc13)/C(C)=C\CC[C@@]1(C)O[C@H]21
CC(C)=C1CCC2=C(CC[C@@H]3[C@]2(C)CCC[C@@]3(C)CO)C1
Cc1ccc(S(=O)(=O)Oc2ccc(C=NNC(=S)Nc3ccccc3)cc2)cc1
Cc1cccc([C@H]2CC[C@H](C(=O)N3CCC(Cc4ccccc4)CC3)CN2C(=O)C2CCCC2)c1
Fc1ccccc1Cn1c(C2CC2)nc2ccccc21
Cc1ncc(N2C[C@@H]3CN[C@@H]3C2)cc1C#N
Cc1cccc(-c2nnc(S)n2N)c1
COc1ccc(OC)c(NC(=S)N2CCC3(CC2)OCCO3)c1
C=C1C[C@](OC)([C@H](O)C(=O)N[C@@H](OC)[C@@H]2C[C@@H](O)C(C)(C)[C@@H](C[C@@H](CO)OC)O2)O[C@H](C)[C@@H]1C
O=C(Nc1cccc(Cl)c1)N[C@H](CC(=O)OCc1ccccc1)C(=O)OCc1ccccc1
O=C1/C(=C/c2ccc(Cl)cc2Cl)S/C(=N\c2ccccc2)N1C1CCCCC1
C/C(=N\Nc1nc(-c2cccc(O)c2)cs1)c1cccnc1
O=C(NCC1(c2ccccc2)CCCC1)C(=O)N1CCOCC1
COC(=O)C1=C(N)N(c2cccc(Cl)c2C)C2=C(C(=O)CCC2)[C@@H]1c1ccc(OC)c(OC)c1
COCCNC(=O)CSc1nnc(-c2ccccc2F)n1Cc1ccccc1
COc1ccccc1C1OCC(C)(C(=O)Nc2ccc(OC(C)C)c3ccccc23)CO1
CN(C)c1ccc(-c2nc3cc(N=C=S)ccc3o2)cn1
CN(C(=O)c1cnc2c(c1)nnn2C)[C@H]1CCCN(CCc2ccccc2)C1
C[C@H](NC(=O)[C@H]1CCCN1C(=O)OCc1ccccc1)C(=O)NC(c1ccc(C(=N)N)cc1)P(=O)(Oc1ccccc1)Oc1ccccc1
COc1ccc(NC(=O)c2cc3c(=O)n(Cc4ccco4)ccc3nc2C)cc1
CCCc1cccc(Cl)c1COc1ccc2c(c1)OCC21CCN(CCC(=O)O)CC1
CCOC(=O)c1ncn2c1CN(C)C(=O)c1ccccc1-2
Cc1cccc2nc(CNC(=O)N3CCC([C@@H](O)c4nccn4C)CC3)cn12
CCNC(=O)[C@@H]1C[C@H](N)CN1S(=O)(=O)c1ccc(-n2cccn2)cc1
Cc1ccc(S(=O)(=O)Nc2ccc(Cl)cc2C(=O)Nc2ccc([N+](=O)[O-])cc2Cl)cc1
CC(C)c1ccc(OC(=O)c2ccc(Cl)cc2)cc1
O=C([C@@H]1C[C@H](COc2ccc3c(c2)CCC3)CN(Cc2ccccc2)C1)N1CCCC1
CCCN(CC(=O)Nc1c(C)cccc1[N+](=O)[O-])[C@H]1C[C@@H](OCC)C12CCCC2
O=C1C=CC(=O)C(Nc2ccccn2)=C1
CCCC(=O)/N=C1\S[C@@H]2CS(=O)(=O)C[C@@H]2N1c1ccccc1
C[C@H](CC(=O)N(CC#Cc1ccccc1)C1CCCC1)n1cccn1
CN(C)c1nc(Cl)cc(N2CCOCC2)n1
Cc1ccc(-n2c(SCc3ccccc3F)nc3sc4c(c3c2=O)CCCC4)cc1C
CCc1cc(=O)oc2c(C)c(OCc3ccccc3OC)ccc12
O=C1NCCc2c1ccc1[nH]cc(CCNCc3cocn3)c21
C=C(C)[C@@H]1CC[C@](C)(C#N)O[C@H]1c1ccccc1
N#Cc1ccc(C2CCCc3cncn32)c(Cl)c1
Cn1nc2c(cc1=O)CN(CCOc1ccccc1F)CC2
O=c1ncccn1[C@@H]1O[C@H](CO)[C@@H](O)[C@@H]1O
O=C(CNC1CCCCCC1)Nc1ccccc1N1CCOCC1
Cc1ccc([C@@H](c2nnnn2C(C)(C)C)N2CCN(c3nc4ccccc4s3)CC2)cc1
COc1ccc(C(=O)CN(C(=O)c2ccc(Cl)c(Cl)c2)N2C(=O)[C@@H]3[C@H]4C=C[C@@H]([C@@H]5C[C@@H]45)[C@H]3C2=O)cc1
COc1ccc(-c2cc3c4c(cccc4c2)C(=O)N(CCN(C)C)C3=O)cc1
CCOc1ccc(CCC(=O)N(Cc2ccccc2)[C@@H](C)C(=O)NC)cc1OCC
Cc1cnn(CC(=O)N2CC[C@H](CCc3noc(-c4cccnc4)n3)C2)c1
NC(=O)c1ccc2[nH]nc(-c3cccc(NC(=O)c4ccco4)c3)c2c1
C[C@H](NC(=O)c1coc(CN(Cc2ccc(F)cc2)Cc2ccccc2F)n1)c1ccccc1
Cc1ccc(C)c(N2N=C(C(=O)N3CC[C@H](C(N)=O)C3)CCC2=O)c1
CCCCCCCCCCCCC/C=C/[C@@H](O)[C@H](COC(=O)N(O)Cc1ccncc1)NC(=O)C(C)(C)C
COc1cccc(C(=O)Nc2ccc(Oc3ccc(O)cc3)c(F)c2)c1
CCCNc1ccc(-c2cc(=O)c3c(N)cccc3o2)cc1
C[C@@H](NC[C@@H]1[C@H]2CNC[C@H]21)c1ccccc1-n1cccn1
CCOC(=O)c1ccc(C(C)C)nc1Cl
C[C@H](Nc1ncc(F)c(N2C(=O)OC[C@@H]2CF)n1)c1cn(-c2cc(F)cc(F)c2)cn1
CCc1ccc2nc(N3CCN(C(=O)c4ccccc4NS(=O)(=O)c4ccc(C)cc4)CC3)sc2c1
COc1cc([C@@H]2Nc3ccccc3NC3=C2C(=O)C[C@@H](c2ccccc2)C3)cc(Cl)c1O
N#Cc1ccc(-c2ccc(O[C@H]3O[C@H](CO)[C@@H](O)[C@H](O)[C@@H]3OP(=O)(O)O)c(Cl)c2)cc1
Cc1ccc(CNC(=O)CSc2nnc(C(=O)Nc3cccc(Cl)c3)s2)o1
COCCNC(=O)[C@@H]1CC[C@@H](C)N(S(=O)(=O)c2cc(Cl)ccc2C#N)C1
CCn1c(/C=C/C=C2/N(C)c3ccccc3C2(C)C)[n+](CCCC(=O)O)c2nc3ccccc3nc21
CCCCCCCCCCCCCCCCCC(=O)N1CC[N+](C)(C)CC1
COc1cccc(NC(=O)N[C@H](C)[C@H]2CCCO2)c1
CCN(CC)Cc1ccc(Br)c(Cl)c1
Cc1ccc(C(=O)Nc2ccc(CCNC[C@H](O)c3cccnc3)cc2)c(N2CCCC2)c1
NCC(=O)NCCNC(=O)c1ccc2c(c1)C(=O)c1ccc(C(=O)NCCNC(=O)CN)cc1C2=O
COc1ccc(CCCCc2ccc(O)c(O)c2)cc1
CCCN(CCCC(=O)NC)C1CCc2c(O)cccc2C1
CC(C)COc1ccc(C=O)cc1Br
CCCCN(CCCC)Cc1cn(CC(O)COC(=O)C2CCCCC2)nn1
COCCn1c(C(=O)NCc2n[nH]c(C)n2)cc2ccccc21
CC(C)(C)CNC(=O)CN(CCc1ccccc1)S(=O)(=O)c1ccc(Br)cc1
CC(=O)OC1c2c(ccc3ccc(=O)oc23)OC(C)(C)C1OC(=O)CC(C)C
O=C(COc1ccc(C(F)(F)F)cc1)NNC(=S)NCCCCC1CCCCC1
CCC(CC)C(=O)Oc1ccc2c(=O)c(Oc3cccc(C)c3)c(C(F)(F)F)oc2c1
CC1(C)[C@@H]2CC[C@@]1(CS(=O)(=O)N1CCC3(CCc4ccccc43)CC1)[C@@H](NC(=O)C1CN3CCC1CC3)C2
CNCCOc1cnc(Cl)c(Cl)c1
Cc1nc(O)nc(C)c1CCC(=O)N[C@@H]1CCCN(C(=O)c2ccco2)C1
CCOc1cc(CNC(=O)COc2ccc3c(c2)CCCC3)ccc1OC
CCOc1ccc2nc(Sc3ccc(C)cc3)c(C=O)cc2c1
C[C@@H](C(=O)OCC1CCCCC1)N1C(=O)c2ccccc2C1=O
CN1CCC(Oc2ccccc2Sc2ccccc2C(F)(F)F)CC1
O=C1NC(=O)C(c2c3n(c4ccccc24)C[C@@H](CO)C3)=C1Nc1ccccc1
CN1CCN(c2ccc3c4c(cccc24)-c2nc4cc([N+](=O)[O-])ccc4nc2-3)CC1
CC1=CC(=O)N(Nc2ncc(C3=NCCO3)c(C(F)(F)F)n2)C1=O
Cc1nc([C@@H]2CCCN2C(=O)[C@H]2C[C@@H]2c2ccc(C)s2)no1
O=C(O)COc1ccccc1O
Cc1ccsc1CN(C)C(=O)[C@H](N)CC(C)C
COCCO[C@H]1[C@@H](n2cc(C)c(NC(=O)c3ccccc3)nc2=O)O[C@H](COC(c2ccccc2)(c2ccc(OC)cc2)c2ccc(OC)cc2)[C@H]1O
CC1=NNC(=O)/C1=N\Nc1cc(C(=O)Nc2cc(Cl)c(Cl)cc2Cl)ccc1Cl
COc1ccc(-c2noc(C3CCCN(C(=O)c4ccccc4OC)C3)n2)cc1OC
CCN1CCCC1CNC(=O)c1ccc2c(=O)n(CCOC)c(=O)[nH]c2c1
CCS(=O)(=O)N1CCN(C(=O)NC(C)C)CC2(CC(=O)N(C)C2)C1
CC(C)(C)c1cccc(Oc2ccc3c(c2)C(OC(=O)c2ccccc2)=CS(=O)(=O)N3)c1
COc1ccc2c3c1O[C@H]1C[C@@H](O)C=C[C@@]31CCN(CCCCCOc1ccc(CN3CCCCC3)cc1)C2
CC(C)(C)C(C)(O)CC[C@]1(C)[C@H]2Cc3ccc(O)cc3[C@@]1(C)CCN2CC1CC1
COc1cccc([C@@H](C)N2CCN(C[C@@H](O)C(F)(F)F)CC2)c1
CCC(=O)Nc1ccc2nc3c(=O)n(C)c(=O)n(C)c3nc2c1
CCOc1cncc(-c2cc3c4c(c2)CCN4C(=O)CC3)c1
Cc1ccc(S(=O)(=O)[C@H]2[C@H](c3ccccc3)[C@]2(C#N)C=O)cc1
CN1CCN(S(=O)(=O)c2ccc(Nc3ccc(F)cc3)nc2)CC1
Cn1cc(-c2nnc3sc(Cc4ccccc4OC(F)(F)F)nn23)cn1
COc1ccc(SC)cc1C
COc1ccc(CCNC(=O)CSc2ccc3nnc(-c4cccnc4)n3n2)cc1OC
CCc1cc(NCc2ccco2)c(O)nc1C
COc1ccccc1NC(=O)NCCCn1c(-c2ccc(C)cc2)nc2cccnc21
CCCC1(CCC)c2cc(/C=N\O)ccc2-c2ccc(-c3ccc(C(C)(C)C)cc3)cc21
COc1ccc(N2CCN(C(=O)c3c(C)nn(-c4ccccc4)c3C)CC2)cc1
O=C(CCl)Nc1ccc(-n2nc(OC3CCCC3)nc2-c2ccc(Cl)c(Cl)c2)cc1
Cc1c(NS(=O)(=O)c2ccccc2C#N)c(=O)n(-c2ccccc2)n1C
COC(=O)[C@@H]1C[C@@H](NC(=O)c2ccc(OC)cc2)CN1CC(c1ccccc1)c1ccccc1
CCO[C@@H]1C[C@@H](NC(=O)N2CCC[C@H](N(C)CC(=O)O)CC2)C12CCCCC2
O=Cc1ccc[nH]c1=O
CCN1c2ncccc2-c2ncc(C)n2-c2ccc(N3CCCC3)nc21
O=C(N1CC[C@](c2cc(F)ccc2F)(S(=O)(=O)c2ccc(Cl)cc2)[C@H](O)C1)C1(C(F)(F)F)CC1
Cc1ccccc1-n1ncc(C(=O)Nc2nc3ccccc3[nH]2)c1C1CC1
C=CCN1CCCC1
N#C[C@H]1C2CCC(CC2)[C@@H]1C#N
Cc1cc2nc(COc3cc(NC(=O)C(C)(C)C)ccc3C)cc(=O)n2o1
CCCc1n(Cc2ccc3ccccc3n2)cc[n+]1Cc1ccc2ccccc2c1
O=C(Nc1ccc(OC2CCN(Cc3ccccc3)C2)c(Cl)c1)c1ccc(F)cc1
COc1ccc(CNC(=O)c2csc([C@@H](NC(=O)c3csc([C@@H](NC(=O)OC(C)(C)C)C(C)C)n3)C(C)C)n2)c(OC)c1
O=[N+]([O-])c1ncccc1OCCOc1ccc(Cl)cc1Cl
Cc1nc2ccccc2nc1CN1CCN(S(=O)(=O)N(C)C)CC1
Cc1cccc(C(C(=O)NCCn2cccc2)N(C)C)c1
COc1cccc(-c2[nH]c(C(=O)NCC3CCCO3)cc3c4ccccc4nc2-3)c1
CC[C@@]1(C(N)=O)CCCN(C(=O)CCS(C)(=O)=O)C1
CC(C)(O)c1cccc2nn(CCc3ccc4ccccc4n3)c(=O)n12
C=Cc1ccc(S(=O)(=O)Nc2ccc(Sc3nccn3C)cc2)cc1
O=C(N1C[C@H](O)C=C[C@@H]1Cc1ccccc1)n1cc(-c2ccc(-c3ccccc3)cc2)nn1
CN(C)S(=O)(=O)c1cc(NC(=O)C[N+]23CCN(CC2)CC3)ccc1Cl
CC[C@H](C)OC(=O)NC[C@@H]1CCS(=O)(=O)C1
Cc1cc(NC(=O)CCS(=O)(=O)c2nc(-c3ccccc3)cc(C(F)(F)F)n2)no1
Fc1ccc(-c2cnc(Nc3ccc(C[C@@H]4CCNC4)cn3)s2)cc1
Cc1ccc(C(=O)N2CCC3(CCN3c3ncccn3)C2)cn1
Cc1onc(-c2ccc(F)cc2)c1C(=O)NCc1ccc(F)cc1
COc1ccc(S(=O)(=O)NCCSCc2ccccc2C)cc1C
O=C(C[n+]1ccc2ccccc2c1)Nc1cc(C(F)(F)F)ccc1Cl
CCN(CC)CCN1C(=O)C(O)(c2ccc3ccccc3c2)c2c(Br)cccc21
Cc1nc2ccc(NC(=O)[C@H]3CCCN3S(=O)(=O)c3ccc(Cl)s3)cc2s1
C/C(=N\n1c(/N=C/c2ccc(Cl)cc2)c(C#N)c(-c2ccc([N+](=O)[O-])cc2)c(C#N)c1=O)c1nc2ccccc2[nH]1
C[C@@H](NC(=O)c1sc(-c2ccc(C3N=NN=N3)cc2)nc1C(F)(F)F)[C@](O)(Cn1cncn1)c1ccc(F)cc1F
COc1cc([C@@H]2C3=C(O)[C@@]4(Oc5c(Cl)c(OC)cc(OC)c5C4=O)[C@@H](C)CC3=Nc3c2c(=O)n(C)c(=O)n3C)ccc1O
Cc1nn(C)c(C)c1C(=O)N1CCO[C@@H](CNc2nccn(C)c2=O)C1
O=C(NCc1ccccc1F)c1nc(-c2ccc(-n3cccc3)cc2)no1
CCc1ccccc1NC(=O)[C@@H]1c2ccccc2C(=O)N(C)[C@H]1c1cn(C)c2ccccc12
CC(C)CC1(C)NC(=O)N(CC(=O)Nc2ccccc2Br)C1=O
Cc1nc([C@H]2CCCN(C(=O)C3CCCCC3)C2)nc2c1CCC(=O)N2Cc1ccccc1
CC1(C(=O)NS(=O)(=O)c2ccccc2Cl)CCN1C(=O)CC1CC1
COc1ccc(-c2cnc(NC(=O)NC3CCCC3)n2C)cc1
Cc1ccccc1N1CCC(Oc2nc(-c3ccncn3)cc(=O)n2C)CC1
CCCCn1c(Sc2nc3cccc(F)c3s2)nc2c(N)ncnc21
CC(=O)c1ccc(S(=O)(=O)NCCC(=O)OCC(=O)N2CCCC2=O)cc1
O=C1NC(=O)N(c2ccc(C34CC5CC(CC(C5)C3)C4)cc2)C(=O)/C1=C/c1ccc(-c2ccc([N+](=O)[O-])cc2Cl)o1
Cn1cccc1CN1CCC[C@]2(N[C@H](c3ccc(C(F)(F)F)cc3)[C@@H]3C(=O)N(Cc4ccccc4)C(=O)[C@@H]32)C1=O
CCOC(=O)C1=C(C)N=c2s/c(=C\c3ccc(OCC#N)c(Br)c3)c(=O)n2[C@H]1c1cc(OC)c(OC)cc1Br
O=C(/C=C/c1ccc(OC[C@H]2CO2)cc1)c1ccccc1
Cc1cc(C)c2nc(NC(=O)c3cccc(S(=O)(=O)N4CCc5ccccc54)c3)sc2c1
CCCOc1ccc(NC(=O)C[C@@H]2S/C(=N/N=C(\C)c3cccs3)NC2=O)cc1
COc1ccc2c(c1)cc(C(=O)NCc1ccc([N+](C)(C)C)cc1)n2Cc1cccc(C(=N)N)c1
NC(=S)NCCOc1ccc(Cl)cc1Cl
CCOC(=O)c1ccc2c(C(=O)NCc3cc(F)cc(F)c3)c(C(C)C)n(Cc3ccccn3)c2c1
CC(C)Oc1cc(N2CCC(O)CC2)ccc1Nc1ncc2c(n1)N(C1CCCC1)CCC(=O)N2C
Cc1cc(CN2CCCC2C)ccc1C(=O)Cn1ccc(OCc2ccc(Br)cn2)nc1=O
C/C(=C\c1cccc(C(F)(F)F)c1)CO
CC(C)c1cc(-c2noc(NC(=O)C3CC3)c2-c2ccc(CN3CCC(N4CCOCC4)CC3)cc2)c(O)cc1O
COc1ccc(OC)c([C@H](O)CNC(=O)N[C@H](C)[C@@H]2CCCO2)c1
CNC(=O)[C@@H](C)N(Cc1cccc(Cl)c1)C(=O)CN(c1ccc(C)cc1)S(=O)(=O)c1ccc(OC)cc1
C[C@@H]1CC[C@H]2[C@@H](C)C(=O)N(/N=C/c3ccccc3)[C@@H]3O[C@@]4(C)CC[C@@H]1[C@@]23OO4
CC(=O)OC1N=C(c2ccccc2)c2ccccc2NC1=O
COc1cc(F)ccc1N1CCN(C[C@H]2C[C@@H]2c2ccccc2)CC1
COC[C@H]1CCCN(C(=O)CC2CCC(C(F)(F)F)CC2)C1
C=C[C@]1(C)C[C@@H](OC(=O)CSC2CCN(C(=O)CCCn3cnc4cnc(N)nc43)CC2)[C@@]2(C)[C@H]3C(=O)CC[C@@]3(CC[C@H]2C)[C@@H](C)[C@@H]1O
Nc1ccc(-c2ncc3cc(-c4cccc(-c5cc6cnc(-c7ccc(N)cc7)nc6c6ccccc56)c4)c4ccccc4c3n2)cc1
COc1ccc(CN2CCN(Cc3ccccc3F)CC2)c(OC)c1
COc1cc(Cl)c(C)cc1NCC(=O)Nc1cccnc1Cl
Cc1nc[nH]c1CN(CCO)C(=O)CCCN1CCCCCC1
O=C(CN1CCN(CCOCCO)CC1)Nc1ccc(OC(F)(F)Cl)cc1
C[C@H]1CN(c2nc3ccccc3nc2SCC(=O)N2CCN(c3ccc(Cl)cc3)CC2)C[C@@H](C)O1
Cc1ccc(NC(=O)N2CCC(n3cnc4cccnc43)CC2)cc1Cl
O=C(O)/C=C/c1ccc(-c2cc(C(=O)O)ccc2Cl)o1
Cc1sc(NC(=O)C2CCCCC2)nc1-c1ccccc1
c1ccc(CNCC2Cn3nnc(-c4ccncc4)c3CO2)nc1
CN(CCC[C@H]1CCCO1)CCC(=O)Nc1nccs1
CCc1nnc(NC(=O)CSc2nc3cccnc3n2Cc2ccccc2)s1
c1ccc(SC2(n3nc4ccccc4n3)CCCCC2)cc1
C=C1c2c(n(S(=O)(=O)c3ccccc3)c3ccccc23)[C@@]2(C(=O)OC)CC3C=CC2N1C3
Cc1noc(/C=C/Nc2ccc(F)cc2F)c1[N+](=O)[O-]
Cc1cc(S(=O)(=O)Nc2cc3c(cc2NCc2ccccc2)n(C)c(=O)n3C)ccc1F
Cc1ccc(C[S@](=O)Cc2ccc(C(=O)NCCC(C)C)o2)cc1
C[C@H](C(=O)N[C@@H]1CCc2nccn2C1)c1ccsc1
O=c1[nH]nnc2c1C(c1ccc(Cl)cc1)C1=C(CCCC1)N2
CC(=O)N1CCN(Cc2c[nH]cn2)[C@H](c2ccccc2)C1
CCOc1cc(C2C3=C(CC(C)(C)CC3=O)N(Cc3ccccc3)C3=C2C(=O)CC(C)(C)C3)cc(Cl)c1OC(C)C
O=[N+]([O-])c1cccc(Oc2ncccc2[N+](=O)[O-])c1
CCOC(=O)c1ccc(NC(=O)CN(c2cccc(C)c2C)S(C)(=O)=O)cc1Cl
O=C(Cc1ccc(Cl)cc1)Nc1cccc2cn[nH]c12
COc1cccc(/C=C/C(=O)Oc2cccc3ccc(C)nc23)c1
O=C([C@@H]1CCCN1c1nc(Nc2cc(C3CC3)[nH]n2)c2cccn2n1)N1CCNCC1
CCOC(=O)C1=C(NC(=O)c2ccc(S(=O)(=O)N3CCCC3)cc2)Nc2ccccc2N=C1CC
Cn1c(N)c(C(=O)COC(=O)CNC(=O)c2ccccc2F)c(=O)n(C)c1=O
CCc1ccc(Cl)c(CC)c1NC(=O)CN1CCN(C(=O)c2cccs2)CC1
c1ccc(-c2ccc(-c3cc(CNC45CC6CC(CC(C6)C4)C5)no3)cc2)cc1
CN=c1nc(Nc2ccc(F)cc2C)cc(C2CC2)[nH]1
O=C(COC(=O)CSCc1ccccc1)NCc1ccccc1
CCOc1ccc2c(c1)C(c1ccc(OC)cc1)=C(C(=O)O)C(c1ccc3c(c1)OCO3)O2
Cc1ccc(C)c(CN2C(=O)/C(=C/c3ccc(C(=O)N4CCN(c5cccc(Cl)c5)CC4)cc3)Sc3ccccc32)c1
CCCCCCCCCC[C@H](O)[C@H]1CC[C@@H]([C@@H]2CC[C@H]([C@H](O)CCCCCCCCCC/C(CC3=C[C@H](C)OC3=O)=N\O)O2)O1
O=C(Nc1cccc([N+](=O)[O-])c1)c1cccnc1SC(F)F
Cc1ccc(C(C)C)cc1OCC(=O)NC1CCCCCCC1
COc1cccc(Sc2nc(-c3ccccc3)nc3ccsc23)c1
Cn1cnc(S(=O)(=O)N2C[C@H]3[C@@H](NC(=O)c4ccc(Cl)cc4Cl)CC[C@H]3C2)c1
CCN1C(=O)[C@H]2[C@@H](C1=O)[C@H]1CN=C(SCc3ccc(C(=O)OC)cc3)N1[C@@]2(CC)C(=O)OC
COC(=O)[C@@H]1CCC(=O)N(Cc2ccco2)C1
CC(C)Nc1ccc(F)c(C(F)(F)F)c1
CCCCCC(=O)Nc1cc(O)nc2nc(COc3ccccc3)nn12
Cc1ccc2nc3c(c(C(=O)N(C)CC(F)F)c2c1)CCCC3
CCCc1c(-c2ccco2)noc1N
Nc1cccc(CCc2ccc3cc[nH]c3c2)n1
COc1cccc2c1-c1[nH]nc(NCc3c(C)cccc3Cl)c1C2
COc1ccc2nccc([C@@H](O)CN3CCC(NC(=O)Cn4nc(-c5ccc(C(F)(F)F)cc5)ccc4=O)CC3)c2c1
C=CCSC(=S)NCc1cc2c3ccccc3n(C)c2c(-c2ccc(C(F)(F)F)cc2)n1
Cc1cc2nc(-c3cncn3C)n(-c3ccc4c(N)nc(N)nc4c3)c2cc1C
CCCCS(=O)(=O)N1CCN(c2ccnc(N3CCOCC3)n2)CC1
COC(=O)c1ccccc1NC(=O)CSc1ccc(-n2nccc2C)nn1
Cn1cc2c(NC3=NCCN3)cccc2n1
CC(c1cccc[n+]1[O-])C1OCCO1
Cn1c(SCC(=O)NN2C(=O)NC3(CCCCC3)C2=O)nnc1-c1ccncc1
O=C1NC(=O)C(CC(=O)N(c2ccccc2)C2(C(=O)NC3CCCC3)CCCCC2)N1
Cn1ncc(NC(=O)C(=O)NCCCN2CCCC2=O)c1C(N)=O
CCCN(CCc1ccc(Cl)c(Cl)c1)CC(O)c1cccnc1
CCNC(=O)[C@H](C)N(Cc1cccc(OC)c1)C(=O)CSCc1c(F)cccc1Cl
O=S(=O)(c1ccccc1)c1ccccc1-c1n[nH]c(=S)o1
CC1Oc2ccc([N+](=O)[O-])cc2C(N2CCCC2=O)[C@@H]1O
Cc1[nH]c2ccc(C(=O)N3CCCC3)cc2c1C
CCc1cc(-c2noc(-c3ccc(CN(C)CC(C)C)c(C)c3)n2)cc(C)c1OC[C@@H](O)CNC(=O)CO
COc1ccc(OC)c2sc(N(CCN(C)C)C(=O)c3ccc(C)cc3)nc12
COc1ccc(-c2cc3nc(O)ccc3c(NCCCN)n2)cc1
CN(C)C(=O)c1ccc(C2CCN(Cc3ccc(N4CCOCC4)c(F)c3)CC2)nc1N
O=C(Nc1nc2ccc(Cl)cc2s1)c1ccc(Cl)cc1
OC1=NCCCC[C@H]1N/C(O)=N/CC1CCC2(CC1)OCCO2
CCOc1ccccc1NC(=O)C1CCN(S(=O)(=O)c2ccc3c(c2)C[C@H](C)N3C(C)=O)CC1
CCC(C)(C)C(=O)O[C@H]1C[C@@H](C)C=C2C=C[C@H](C)[C@H](CC[C@H](O)C[C@@H](O)CC(=O)O)[C@H]21
CCCn1c(=O)n(CC(=O)NC[C@H]2CCCO2)c(=O)c2c3c(sc21)COC(C)(C)C3
O=C(Nc1ccc2c(c1)OCO2)C1CC(c2ccccc2Cl)=NO1
CC(Nc1nccc(-c2cc(C3CCNCC3)nnc2-c2cccc(C(F)(F)F)c2)n1)c1ccc(F)cc1
CCOC(=O)CC(=O)c1ccc(C)o1
CC(CS(=O)(=O)c1ccccc1/N=C/c1c(O)ccc2ccccc12)c1ccccc1
CC(C)n1c2c(c3ccccc3c1=O)C(=O)c1ccccc1-2
c1ccc(Sc2ccc3cccnc3n2)cc1
CCOc1nc2ccccc2nc1C(=O)Nc1ccc(O)c(CN2CCOCC2)c1
CN1CC2=C(N=C(S)NC2c2ccc(Cl)cc2)/C(=C/c2ccc(Cl)cc2)C1
COc1ccc(CCNC(=O)C(=O)Nc2ccccc2C)cc1OC
O=C1S/C(=C/c2ccc(-c3cccc(Cl)c3)o2)C(=O)N1CCCc1ccccc1
CN(C(=O)CSc1nnc(Cc2ccc([N+](=O)[O-])cc2)n1-c1ccccc1)c1ccccc1
COc1ccc(Nc2ccc3nnc(C(F)(F)F)n3n2)cc1NC(C)=O
Cc1ccc(C(=O)N2CCOCC3(CCN(C4CCOCC4)C3)C2)o1
CCCCOP(=O)(CCCCC1(C(=O)NCCN2CCOCC2)c2ccccc2-c2ccccc21)OCCCC
Nc1ccc(C(F)(F)F)cc1N
CC1CCCC(C)N1C(=O)COC(=O)CCC(=O)c1cccs1
COc1ccc(Oc2c(C(F)(F)F)oc3cc(OC(=O)c4ccc(F)cc4)ccc3c2=O)cc1
Cc1ccc(-c2nn3c(C)nnc3s2)cc1NC(=O)CSc1ccc(Cl)cc1
CN(C)C12CCNC(C(c3ccc(F)cc3)C1)C(c1ccc(F)cc1)C2
COc1ccc(CCNC2=C(C(C)=O)C(=O)O[C@@H]2c2ccccc2)cc1OC
Cc1c(Cc2ccccc2)n(C(C)OCCN(OC(=O)Oc2ccccc2)C(=O)Oc2ccccc2)c(=O)[nH]c1=O
CCNC(=O)[C@H](CC)N(Cc1ccc(Cl)cc1)C(=O)CN(c1cc(Cl)ccc1C)S(C)(=O)=O
CC(=O)NCCC(=O)N1CCC[C@@H]1C(=O)NC1C2CC3CC(C2)CC1C3
COc1ccccc1-c1ccnc(-n2ncc(C(=O)NCc3cccnc3)c2C)n1
CCN(CC)C(=O)C1=C(C)N=c2s/c(=C\c3cc(Cl)ccc3OC(C)C)c(=O)n2[C@H]1c1ccc(Cl)cc1
O=C(NCc1ccc2c(c1)OCO2)[C@H]1Cc2c(sc3ccccc23)CN1
COc1cc(OC)c(OC)cc1CNCc1ccc2c(c1)OCO2
COc1ccc(OC)c(/C=C/c2ccc(F)cc2)c1
CC[C@H](Sc1nnc(-c2ccccc2)o1)c1ccc(Cl)cc1
Cc1ccc(NC(=O)c2cc(-c3cc4cc(C(=O)O)ccc4[nH]3)ccc2N2CCCCC2)cc1
CC(=O)C(=CN(C(C)C)C(C)C)C(C)=O
CS(=O)(=O)c1ccc(-c2c[nH]c3c(=O)n(Cc4cc(F)ccc4C#N)c(N4CCC[C@@H](N)C4)nc23)cc1
Cc1cccc(N2CCC(N3CC[C@@]4(CCCNC4=O)C3)CC2)c1C
CCCCNC(=O)[C@H](C)N(Cc1cccc(Br)c1)C(=O)CN(c1cc(C)cc(C)c1)S(C)(=O)=O
CC(C)CCC(=O)N[C@@H](CNC(=O)c1ccc2c(cnn2CCCNc2ccccn2)c1)C(=O)O
COC(=O)C/C=C/C1=CO[C@]23CCC1[C@@]2(C)CC[C@H]1[C@H]3CC[C@@H]2C[C@@H](OC(C)=O)CC[C@]12C
C=C1C[C@@]23CC[C@H]4[C@@](C)(CCC[C@@]4(C)C(=O)NCCNC(=O)[C@]4(C)CCC[C@]5(C)[C@@H]4CC[C@]46CC(=C)[C@](O)(CC[C@@H]54)C6)[C@@H]2CC[C@]1(O)C3
O=C1C(=O)N(CCN2CCOCC2)[C@H](c2ccc(Cl)cc2)/C1=C(\O)c1ccc(F)cc1
CC(=O)N1CCC[C@H]1c1ncc(-c2ccc(-c3ccc(-c4cnc([C@@H]5CCCN5C(C)=O)[nH]4)cc3)cc2)[nH]1
CCOC(=O)CC(=O)CSc1ncnc2c1nnn2-c1ccccc1
CNc1nc(SCC(=O)OC)nc(N2CCOCC2)n1
CC(NS(=O)(=O)c1ccc2nc(O)c(O)nc2c1)C(=O)O
CCN(CC)C(=O)COC(=O)c1cc(-c2ccco2)nc2ccccc12
O=S(=O)(c1cc(Cl)cc(Cl)c1O)N1CCN(CCO[C@@H](c2ccccc2)c2ccc(F)c(F)c2)CC1
CC(=O)c1ccc2c(c1)N=C(c1ccc(C(=O)O)cc1F)c1cc3c(cc1N2C)C(C)(C)CCC3(C)C
O=C1CCCC2=C1C(c1ccco1)Nc1ccc3ccccc3c12
CCOc1nccn2c(CNC(=O)c3cn(C)nc3OC)nnc12
C[C@@H](NCc1ccc(OCc2ccc(OCCCN3CCCCC3)cc2)cc1)C(N)=O
O=C(OCC12CCN(CC1)CC2)c1c[nH]c2cc(OC(F)F)ccc12
C#Cc1cc(Cl)c2c(c1)C=C(C(=O)O)C(C(F)(F)F)O2
C[C@@H](NC(=O)N1CCN(S(=O)(=O)c2cccc(Br)c2)CC1)c1nnc2ccccn12
FC(F)(F)Oc1cccc(-c2cc(=NCc3ccccc3)[nH]c(=NC3CCCC3)[nH]2)c1
CC1=C(C(=O)OC(C)C)[C@H](c2cccc(F)c2)N2C(CC(=O)NC[C@@H]3CCCO3)=CSC2=N1
CCCCOc1ccc(-c2cc3c(SCc4cccc(C(F)(F)F)c4)nccn3n2)cc1
CO/N=C(\C(=O)NC1C(=O)N2C(C(=O)[O-])=C(CN(C)c3sc(C(N)=O)c(C)[n+]3C)CSC12)c1csc(N)n1
CC1(C)CCC(C)(C)c2cc(C(=O)NC[C@@]3(O)CCOC3)ccc21
CN(C(=O)COC(=O)C1CCN(S(=O)(=O)c2ccc(Cl)cc2)CC1)C1CCS(=O)(=O)C1
CC[C@H](C)NC(=O)[C@H](CCSC)NC(=O)[C@H]1Cc2c([nH]c3ccccc23)[C@@H]2c3ccccc3C(=O)N21
CCC(C#Cc1cc(-c2ccc(C)cc2)n(-c2ccc(OC)cc2)n1)N(O)C(N)=O
COC(=O)N(c1ccc(Nc2c3ccccc3nc3ccccc23)cc1)S(C)(=O)=O
CCCCn1cc(CN2CCCCC2)c2cc(Br)cnc21
Cc1ccc(N(CC(=O)N(CCc2ccccc2)[C@@H](C)C(=O)NC(C)C)S(=O)(=O)c2ccc(Cl)cc2)cc1
Cc1ccc(Oc2ccc(NC(=O)Nc3ccc(F)cc3)cc2)nn1
O=C(N[C@H](C(=O)O)c1ccco1)OCc1ccccc1
O=C(NC[C@H]1Cc2cc(-c3ccsc3)cc(Cl)c2O1)c1ccncc1
OCC1OC(/C=C\c2ccccc2)C=CC1Oc1ccc2c(c1)OCO2
Cc1ccc(C(=O)CCC(=O)N2CCNC(=O)C2)cc1C
CN1C(C(=O)Nc2ccncc2)=C(O)c2sccc2S1(=O)=O
Fc1ccccc1Nc1nnc(S)s1
C=C(C)COc1ccc2c(C)c(CC(=O)NCCc3ccncc3)c(=O)oc2c1
C[C@@H]1CCCC[C@@H]1OCCNc1ncnc2c1cnn2C
CS(=O)(=O)NC[C@H]1CC[C@H](Nc2nc(-c3cccc(Cl)c3)no2)CC1
Cc1cc(NC(=O)N2CCO[C@H](C)[C@H]2C)ccn1
N#Cc1ccc(NC(=O)COc2cccc(Oc3ccccc3)c2)cc1
Cc1ccc(OCC(=O)NC2CC(C)(C)NC(C)(C)C2)cc1C
C[C@H](CCc1ccccc1)NC(=O)C(=O)c1c(-c2ccc(Cl)cc2)cc2ccccn12
COCC1=NN(c2nc(-c3ccc(OC)cc3)cs2)C(=O)/C1=N\Nc1ccc2c(S(=O)(=O)O)cc(S(=O)(=O)O)cc2c1
CC(C)(C)OC(=O)N1CCc2nc(NC(=O)c3ccccc3SCc3cscn3)sc2C1
CCCCN1CCN2CCc3ccc(F)cc3C2C1
Cc1ccc(S(=O)(=O)N2CCCN(c3ccc(S(=O)(=O)N4CCN(C)CC4)cn3)CC2)cc1
CCCN(Cc1c(-c2ccccc2)nn(C)c1Oc1ccccc1OC)C[C@@H](O)CC
O=S(=O)(Nc1ccc(CCNC[C@H](O)COc2cccnc2)cc1)c1ccc(Cl)c(Cl)c1
CCOC(=O)c1sc(Nc2nc(NCc3ccc(OCc4ccccc4)c(OC)c3)c3c(ncn3CC)n2)nc1C
Cc1ccoc1C(=O)Nc1cc(C2CC2)nn1[C@H]1CCS(=O)(=O)C1
CCOC(=O)CN=C(S)N(Cc1cccs1)C1CCCCC1
NC(=O)c1c(NC(=O)c2ccc3c(c2)NC(=O)CS3)sc2c1CCCC2
Cc1nc(C)c(C(=O)N2CCC(c3cc(C(=O)NCC(F)(F)F)[nH]n3)CC2)s1
Cn1c(-c2ccc(N3CCNCC3)cc2)cc2c(C#N)ccnc21
COc1cccc(CN(C)C(=O)c2ccc3c(=O)n4c(nc3c2)CCCCCC4)c1
FC(F)(F)c1cc(N=c2cc(-c3ccccn3)[nH]c(=NC3CCCC3)[nH]2)ccc1Cl
CCOC(=O)C1=C(c2ccccc2)N=c2s/c(=C\c3cc([N+](=O)[O-])ccc3Sc3nnc(-c4cccc(Cl)c4)n3CC)c(=O)n2[C@@H]1c1ccc(OC(C)C)cc1
CC(=O)OC[C@]12[C@H](OC(C)=O)[C@H](OC(C)=O)[C@@H]3[C@@H](OC(C)=O)[C@@]14O[C@@]3(C)COC(=O)c1cccnc1C(C)C(C)C(=O)O[C@@H]([C@H](OC(=O)c1ccccc1)[C@@H]2OC(C)=O)[C@@]4(C)O
COc1cc(/C=C2\C(=O)NC(=O)N(c3cccc(F)c3)C2=O)ccc1OCc1ccc(C(=O)O)cc1
CC(C)(C(=O)Nc1ccc(N2CCC3(CCN(CC4CC4)C3)CC2)c(Cl)c1)c1cccc(C(F)(F)F)c1
Cn1cccc1C(=O)NC(CCS)C(=O)N[C@H](Cc1ccccc1)C(=O)O
COC(c1ccccc1)c1nnc(CCC(=O)NCCCc2ccccc2)o1
CN(C)Cc1cnc2n1CCN(Cc1cccc(C#N)c1)CC2
Cc1ccc(N(Cc2ccc(C(=O)N[C@@H]3C[C@H]4CC[C@@H]3C4)cc2)S(C)(=O)=O)cc1C
CN(CC(=O)Nc1ccc(Cl)c(Cl)c1)CC(=O)Nc1cccc2ncccc12
COc1cccc(CC2(O)c3ccccc3C3=NCCN32)c1
CC1=C(C(=O)OCCC(C)C)C(c2ccccc2)C(C(=O)OCCC(C)C)=C(C)N1
COc1ccc(/C=C/CN2CCN(C(c3ccc(F)cc3)c3ccc(F)cc3)CC2)cc1OC
COc1ccc(CCC(=O)NCC2(OC)C3CC4CC(C3)CC2C4)cc1
O=C(c1cccnc1)N(Cc1ccccc1)c1ccccc1
Cc1cc(CNC(=O)N2CCCO[C@H](CN3CCCCC3)C2)cnc1C
O=C(Cn1nnc(-c2ccccc2Cl)n1)Nc1cccc(S(=O)(=O)N2CCCC2)c1
Cc1cc(O)n2nc(CCC(=O)N[C@H](CO)c3ccccc3)nc2n1
CCCc1cc2c(C(F)(F)F)cc(=O)oc2c(CCC)c1OCCCCN1C(=O)N(C)C(C)(c2ccccc2)C1=O
CCN(CC)S(=O)(=O)c1cc(NC(=O)c2c(-c3ccccc3)noc2C)ccc1C
C#CCN1CCN(c2ncc3c(=O)c(C(=O)O)cn(CC)c3n2)CC1
Fc1ccc(-n2cc(CN(Cc3cn(-c4ccc(F)cc4F)nn3)c3nc4ccccc4s3)nn2)c(F)c1
CCNc1nccnc1N1CCCO[C@H](C)C1
Cn1cc(-c2cc(S(C)(=O)=O)ccc2Oc2ccc(F)cc2F)c2cc(CO)[nH]c2c1=O
Cc1ncoc1-c1nnc(SCCN2CC[C@]3(C[C@H]3c3ccc(C(F)(F)F)cc3)C2)n1C
COc1cccc(N2CCN(C(=O)c3ccc(CNc4c(N5CCC(C)CC5)c(=O)c4=O)cc3)CC2)c1
CS(=O)(=O)c1ccc(N2CCC[C@@H]2C(=O)O)cc1
CN(C)C(=O)Cn1cc2c(n1)[C@H](NCc1ccccc1)CCC2
C=C1C(=O)O[C@@H]2/C=C(\C)[C@@H](O)C/C=C(/C=O)C[C@@H](OC(=O)C(C)CC)[C@@H]12
O=c1c2c3c(sc2n(Cc2cc(=O)n4ccccc4n2)c(=O)n1-c1ccccc1)CCCC3
COc1cccc(C(=O)N[C@@H](C)c2ccc3c(c2)CCC3)c1
C=CCN1C(=O)C(C)(C)COc2cc(NC(=O)c3cccc(OC)c3)ccc21
COc1ccc(-c2n[nH]cc2CNC[C@@H]([C@@H]2CCOC2)N2CCCC2)cc1
Cn1nnnc1-c1cccc(NC(=O)c2cccc(N)c2)c1
Cc1cc(-c2ccc(F)nc2)c(CN2CCC3(CC2)CN(c2ccc(C(=O)O)cc2)C(=O)O3)cc1Cl
CC(C)N1CC[C@@H](O)N1C=O
Cc1cccc2ccc(C)[n+](C)c12
C[C@H]1CCC[C@@H](C)N1C(=O)c1nn2c(c1Br)N[C@@H](c1cccs1)C[C@@H]2C(F)(F)F
CCOC(=O)c1ccc2c(c1)nc(SCC(=O)NC(=O)NCCC(C)C)n2CC
CCOc1cc(/C=C2/NC(=O)N(Cc3ccc(F)cc3)C2=O)cc(Cl)c1OC
CC(CN1CCN(c2cccc(Cl)c2)CC1)Cn1ncc2ccccc2c1=O
CCCC(=O)NCCc1cc(NC)nc(-c2ccccn2)n1
O=C(Cn1c(=O)c2cccn2c2cccnc21)NCCCN1CCN(c2ccc3c(c2)OCO3)CC1
C[C@H](NCC(=O)NC(=O)NCc1ccccc1)c1ccc(Br)cc1
COc1cc2ncnc(Sc3nccs3)c2cc1OCCN1CCCC1
COCC/N=C1\Nc2ccccc2N[C@@]12CCCN(C(=O)Cc1cccc(OC)c1)C2
O=C1S/C(=C\c2ccc(Cl)cc2Cl)C(=O)N1Cc1c(F)cccc1Cl
O=C([C@H]1C[C@@H]1c1ccccc1)N1CCC(N2CCCC2)CC1
COCCN1CCC(CNC(=O)c2cc(C)cc(C)c2)C1
CC(C)c1ccc(Cc2nnc(NCCc3c[nH]c4ccc(Cl)cc34)[nH]c2=O)cc1
CCn1cnnc1-c1cccc(N=C(O)C(F)(F)C2CCN(C(=O)OC(C)(C)C)CC2)c1
Cc1cc(Oc2ccc(S(=O)(=O)Nc3nccs3)cc2F)n(-c2ccccc2)n1
SCCNCCc1c[nH]c2ccccc12
CCCCCCSC(=S)NNC(=O)c1cccnc1
CC[C@@H](Oc1ccc(OC)cc1)C(=O)N1CCN(c2ccccc2OC)CC1
CC(C)(O)c1coc(S(=O)(=O)NC(=O)Nc2c3c(cc4c2CCC4O)CCC3)c1
O=C(C[C@@H]1C(=O)Nc2ccccc21)N[C@@H]1CCc2nccn2C1
Cc1ccc(C2=C(c3ccc(F)cc3)C(=O)OC2)cc1
c1ccc(Oc2ccc(-c3cc(CN4CCOCC4)[nH]n3)cc2)cc1
CCc1cc2c(=O)n(CCCOC)c(SCC(=O)Nc3ccccc3[N+](=O)[O-])nc2s1
CCc1nc2ccc(Br)cc2c(=O)n1N=Cc1cc(Br)c(O[C@H](C)C(=O)OC)c([N+](=O)[O-])c1
CCOc1ccc([C@H]2NC(=S)NC(C)=C2C(N)=O)c2ccccc12
O=C(NC1CCC(CCN2CCN(c3cccc(Cl)c3Cl)CC2)CC1)c1ccccc1
Cc1cc(C)n(-c2ccc(C(=O)N[C@H]3CCC[C@H]3C(=O)O)cc2F)n1
COCC(=O)Nc1ccccc1-c1cccc2cnccc12
COc1ccc(CNC(=O)Cn2cc(C)c(=O)[nH]c2=O)cc1
NCCCCNc1cccc(-c2n[nH]c3cnc(-c4cccnc4)cc23)n1
O=C1/C(=C/c2ccc(Cl)cc2Cl)C=C(c2ccccc2)N1c1ccc(Br)c(Cl)c1
CC(C)C(=O)NC1CC1
CC(=O)OCC1=CC2OC1C(C(=O)O)C2C(=O)O
Cc1ccc(NC(=O)[C@H](Cc2ccccc2)n2cnnn2)cc1F
CCOc1ccc(-c2csc3ncnc(O)c23)cc1
CC(C)(C)OC(=O)N[C@H](Cc1c[nH]c2ccccc12)C(=O)N[C@H](Cc1c[nH]c2ccccc12)C(=O)N[C@@H](Cc1ccccc1)C(=O)OCc1ccccc1
O=C(NCCCc1nnc(-c2ccccc2F)o1)C1CC1
CC1=C(C(=O)OC2CCCCCC2)C(c2ccccc2Cl)CC(=O)N1
COc1ccc(-c2nc(-c3ccc(OCc4cc(F)ccc4F)c(OC)c3)no2)cc1
COC(=O)c1ccc(OCc2ccc3ccccc3n2)cc1C(c1ccccc1)C(C)(C)C
CN(C)CCNc1nc(C2CC2)cc(N2CCc3cc(Br)ccc3C2)n1
CC(C)n1nc(-c2cc(C3CCCCC3)on2)c(C(N)=O)c1N
COCCN(Cc1c(C)nn(C)c1C)Cc1cc2cc(C)ccc2n1C
CC1(C)CC[C@@H](C(=O)N2CCC[C@H]2C(=O)O)[C@@H]1S
COc1ccccc1-n1c(=O)n(Cc2ccccc2)c(=O)c2c1ncn2Cc1ccc(C(C)(C)C)cc1
O=C(NCc1ccnc(N2CCCC2)c1)c1cnc(Oc2ccc3c(c2)CCC(c2ccccc2)O3)s1
CCOC(=O)C1=C(CN2CCCN(C(=O)C(C)C)CC2)N(C)C(=O)N[C@H]1c1ccccc1OC
CCCCc1nn(-c2cc(NC(C)=O)ccc2Cl)c(=O)n1Cc1ccc(-c2ccccc2S(=O)(=O)NC(=O)c2ccccc2Cl)cc1
O=C1Nc2cc(S(=O)(=O)N3c4ccccc4COc4cc(F)ccc43)ccc2C12CCNCC2
CC/N=C1/S[C@H](CC(=O)O)C(=O)N1c1ccc(Cl)cc1
O=C(Nc1cccc(F)c1)[C@H]1CN(S(=O)(=O)c2ccccc2)CC12CCOCC2
CCCCc1cc2c(=O)n3cc(C(=O)OC)ccc3nc2s1
O=C(NCc1nccs1)c1nn(Cc2ccccc2)c2c1CN(C(=O)c1ccccc1)CC2
COc1ccc(/C=C2\NC(=O)N(CC(O)CN3CCN(c4ccccc4OC)CC3)C2=O)cc1OC
C[C@H](OC[C@@H]1CCCO1)C(=O)N(C)[C@@H]1CCN(c2ccccc2)C1=O
CCOc1cc(C=O)cc(Br)c1OCc1cccc(Br)c1
O=C1CCc2cc(-n3cnnc3)ccc2N1Cc1ccccc1F
Cc1ccc(-c2ccnc(-c3cccc(C(=O)N4CC[C@H](N)C4)c3)n2)c(C)n1
CC(C)[C@@H](C)[C@@H](O)[C@H](O)[C@@H](C)[C@@H]1CC[C@H]2[C@@H]3CC(=O)[C@H]4CC=CC[C@]4(C)[C@H]3CC[C@@]21C
CCOC(=O)/C(C)=C(/O)C(=O)OCC
CNc1nn2c3c(c(C)nc2c1S(=O)(=O)c1ccccc1)CCCC3
COc1cc([C@@H]2c3cc4c(cc3O[C@]3(O)C=C(C)OC(=O)[C@@H]23)OCO4)cc(OC)c1OC
CN=C(S)N=CNOCc1c(Cl)cccc1Cl
CN1CCN(C(=O)Cn2c(C(F)(F)F)nc3ccccc32)C[C@H]1C(N)=O
COc1cccc(-c2ncc(CN[C@@H]3CCCN(C(=O)c4ccco4)C3)s2)c1
CNC(=O)[C@@H]1CCC(=O)N(c2ccc(C)cc2)[C@@H]1c1cccs1
O=C(Nc1ccc(F)cc1Cl)c1cnn(-c2ccc(Cl)cc2)c1C1CCNCC1
Cc1ccc(C(C)C)cc1OCC(=O)NC[C@@H]1CCCO1
CCSc1ccc(-c2cccc(NC(=O)Cc3ccc(C)cc3)c2)nn1
COc1cc(N2CCC(N3CCN(CCS(C)(=O)=O)CC3)CC2)ccc1Nc1nccc(-c2c(-c3cccc(C(=O)Nc4c(F)cccc4F)c3)nc3ccccn23)n1
CSc1cccc(CN=c2cc([C@H]3CCOC3)[nH]c(=NCCO)[nH]2)c1
CP(=O)(O)O
CCS(=O)(=O)CCN(C)C(=O)C1Cc2ccccc2C1
COc1cc2c(CCNC(C)=O)c[nH]c2cn1
Cc1ccccc1NC(=O)C(=O)CC(=O)c1sc(-n2nc(-c3ccccc3)cc2-c2ccccc2)nc1C
COCCN1CCC[C@]2(CCc3cnc(N)nc32)C1
Cc1cc(NC(=O)COC(=O)CSc2nc3cc(Cl)ccc3n2Cc2ccccc2)no1
O=C(CCCc1c[nH]c2ccccc12)NC[C@@H]1CCCO1
COc1cc2c(cc1OC)[C@@H]1[C@H](O)[C@@H](OC)C=C3CCN(C2)[C@H]31
CN(C(=O)COC(=O)c1c2c(nc3ccccc13)CCCC2)c1c(N)n(Cc2ccccc2)c(=O)[nH]c1=O
CC(=O)c1ccc(N2CCCC(CO)(Cc3ccccc3F)C2)nc1
CN(Cc1ccccc1)C(=O)c1[nH]c(-c2cccc(Cl)c2)nc1C(=O)O
CC(C)N(Cc1nnc(-c2ccccc2)o1)Cn1nc(C2CC2)n(Cc2ccccc2)c1=S
COc1cc(NC(=O)c2cccs2)c(C(=O)NCc2ccc(C)cc2)cc1OC
CCn1c(=O)oc2cc(S(=O)(=O)Nc3cccc(C(N)=O)c3)ccc21
COc1ccc2[nH]c(C(=O)N(C)Cc3ccco3)cc2c1OC
CCCC[C@@H](c1nnnn1Cc1ccccc1)N1CCN(C2CCCCC2)CC1
Fc1cccc(-c2nc(Cl)cc(=NCc3ccccc3Cl)[nH]2)c1
CC(C)n1cc(-c2cnc(N)c(-c3ccc(C(=O)N[C@H](CO)c4ccccc4)c(F)c3)n2)cn1
COc1cccc(N2/C(=N/C(=O)CC#N)S[C@H]3CS(=O)(=O)C[C@@H]32)c1
Cc1noc(C)c1[C@@H]1CCCN1C(=O)c1c(F)cccc1Cl
CC(C)c1ccccc1NC(=O)[C@@H]1CCCN1S(=O)(=O)c1cccc2cccnc12
CCC(C(=O)N[C@@H](CC(=O)O)C(=O)CSCc1ccccc1)n1ccnc(NCc2noc(C)n2)c1=O
CS(=O)(=O)NCCSCc1c(F)cccc1Cl
CN(C)CCn1cnnc1-c1cc(Oc2ccc(NC(=O)Nc3ccc(Cl)cc3Cl)cc2F)ccn1
CC(C)c1ccc(/C=C(C#N)/C=C2\SC(=S)NC2=O)cc1
O=C(CNC(=O)c1ccccc1)NCC(=O)OCC(=O)c1ccc(Cl)cc1Cl
CCCC(C)(C)c1ccc2c(c1)OC(C)(C)c1ccc(CO)cc1-2
CC1CC2(CCC3(O)C4Cc5ccc(O)c6c5[C@@]3(CCN4C)C2O6)OC1=O
CCOc1cc(/C=C2\C(=O)NC(=S)N(c3ccc(Cl)cc3)C2=O)cc(Br)c1OCC
COc1ccc(OC)c([C@@H]2C3=C(CC(C)(C)CC3=O)Nc3ccccc3N2C(=O)C(F)(F)F)c1Br
COn1c(CN)cc2ccccc21
CC[C@H](C(=O)Nc1cccc(Cc2n[nH]c(=O)c3c2CCCC3)c1)c1ccccc1
CCCCCCc1ccc(NC(=O)Oc2cccc(CN(C)CCCOc3ccc4ccc(=O)oc4c3)c2)cc1
C[S@](=O)Cc1cc(NC(=O)CC(C)(C)C)ccc1Cl
CN1C(=O)C(CC=O)(C(C)(C)C)c2ccccc21
Nc1nc(N)c2cc3ccc(OCc4ccccc4)cc3nc2n1
COc1ccccc1[C@H]1Cn2ccnc2CN1Cc1nccs1
Cc1cccc(N2C(=O)CS(=O)(=O)C23C(=O)N(Cc2c(F)cccc2Cl)c2ccccc23)c1
CN(C)c1ccc(/C=C/c2cccc(/C=C/c3ccc(N(C)C)c(O)c3)n2)cc1O
COc1ccccc1N1CCN(C(=O)c2cc(-c3ccc(C)c(C)c3)nc3ccc(Br)cc23)CC1
CCCCCNC(=O)Nc1c(C)cccc1OCCCn1cnc(-c2ccccc2)c1CCC
COc1ccc(N2C(=O)[C@@H](O[C@@H]3C[C@H](C)CC[C@H]3C(C)C)[C@H]2c2ccc(Cl)cc2)cc1
CN1CCc2c(Cl)ccc3c2C(CCC3)C1
Cc1ccc(-c2nsc(SCC(=O)c3ccc(Cl)cc3)n2)cc1
c1ccc(CCCn2cc(C3=NCCO3)nn2)cc1
CCc1ccc(C(=O)N2CCC[C@H]2CNC)s1
COc1ccccc1/C=C1/C(=O)N(c2ccc(Br)c(C)c2)C(=O)N=C1O
NC1=NC2(CO1)c1cc(Br)ccc1OC(CC1CC1)C21COC1
CCc1cc(CNC(=O)c2cccc(S(=O)(=O)N[C@@H]3CCOC3)c2)on1
CCOc1cc2ncc(C(N)=O)c(Nc3cc(C)ccc3F)c2cc1N1CCN(C)CC1
CC(C)(C)c1ccc(NC(=O)CSC(=S)N/N=C/c2cccnc2)cc1
O=C(NCc1cccnc1)C(=O)Nc1ccc2c(c1)OCO2
COc1cc(C2C3=C(CCCC3=O)N(Cc3ccccc3)C3=C2C(=O)CCC3)cc(Br)c1OCc1ccccc1F
CO[C@H]1/C=C\C=C(/C)C(=O)NC2=CC(=O)C(NC(O)CN(C)C)=C(C[C@@H](CO)C[C@H](OC)[C@H](O)[C@@H](CO)/C=C(\C)[C@@H]1OC(N)=O)C2=O
O=C(NCC[S+]([O-])c1ccc(Cl)cc1)c1cccc(Cl)c1
[O-][S+](Cc1ccccc1)c1nc(O)n[nH]1
O=C(c1cccc(Cl)c1)[C@@H]1CCCN(Cc2ccc(-n3cccn3)cc2)C1
CN(Cc1nc2ccccc2[nH]1)C(=O)c1cc(S(=O)(=O)N(C)Cc2nc3ccccc3[nH]2)c[nH]1
COc1cc(/C=C\C(=O)Nc2sccc2C#N)ccc1OC(F)F
C=CCc1cc(CN2C[C@@H](N)C[C@H]2C(=O)NC)ccc1OC
COc1ccc(C[C@@]2(CCC(=O)N(Cc3ccncc3)C[C@@H]3CCC(=O)N3)CCC(=O)N2)c(F)c1
O=C(C[C@H]1C=CCC1)N1C[C@@H](Oc2cccnc2)[C@H]2OCCC[C@H]21
Cc1ccc([C@@H](C)NC(=O)CN2CCCN(S(=O)(=O)N3CCOCC3)CC2)cc1
CCCC(=O)NC(c1ccco1)c1cc([N+](=O)[O-])c2cccnc2c1O
Cc1ccccc1OCC(=O)Nc1nc(-c2cccs2)ns1
CC(C)(C)c1ccc(C(=O)Nc2ccc3oc(Cc4ccccc4)nc3c2)cc1
CN(CCCOc1ccc(Cl)cc1)C(=O)c1ccc[nH]c1=O
CC(=O)N[C@H](Cc1ccccc1)C(=O)N1CCC[C@H]1C(=O)N[C@@H](CCCCN)B(O)O
C=CC(=O)N1CC(Oc2cc3c(Nc4cccc(Cl)c4)ncnc3cc2OC)C1
CCC[C@H](C(=O)NC(C)(C)C)N(Cc1ccc(OC)cc1)C(=O)Cn1nnc(-c2ccc(C)o2)n1
Cc1cc(C)n(-c2ccc(C(=O)NC[C@]3(O)CCSC3)cc2)n1
COc1ccccc1N1CCN(C(=O)NC(C)c2nncn2C)CC1
Cc1ccc(NC(=O)CCN2C(=S)N[C@H](c3ccccn3)[C@@H]2c2cc(C)n(-c3cccc(Cl)c3C)c2C)cc1
CC(C(=O)NC1CCCCC1)N1CCN(C)CC1
COC[C@H](NC(=O)c1cc(C)on1)C(=O)N[C@@H](Cc1ccccc1)C(=O)N[C@@H](CC(C)C)C(=O)[C@@]1(C)CO1
CCCN(CCO)c1c([N+](=O)[O-])cc(C(F)(F)F)cc1[N+](=O)[O-]
CC1=C(C(=O)Nc2ccccc2)C(c2ccc(C)cc2)NC(Nc2nc3ccccc3o2)=N1
CC1CCC2(CC1)NC(=O)N(NC(=O)CSc1nnc(NC3CC3)s1)C2=O
COC(=O)N[C@H](C(=O)N1CCC[C@H]1C1=Nc2cc(-c3ccc(-c4ccc(-c5cnc([C@@H]6CCCN6C(=O)[C@@H](NC(=O)OC)C(C)C)[nH]5)cc4)c4c3CC3(CCCC3)C4)ccc2C2(COC2)N1)C(C)C
Cn1ccc2cc(-c3ccc(-c4cncc(NS(=O)(=O)c5ccc(F)cc5F)c4)s3)ccc21
C=CCNC(=O)NC(=O)CSc1nnc(C(F)(F)F)n1C
Cc1c(Br)ccc(N2C(=O)NC(=O)/C(=C\c3cccs3)C2=O)c1C
CCc1c2c(nc3ccc(NC(=O)CNC(=O)[C@H](Cc4ccccc4)NC(=O)[C@H](CC(C)C)NC(=O)CNC(=O)OCCOC)cc13)-c1cc3c(c(=O)n1C2)COC(=O)[C@]3(O)CC
CCOc1cc(/C=C2/C(=O)N(c3ccccc3)N=C2C)c(Br)cc1OCc1cccc(C(=O)O)c1
CC[C@H](C)NC(=O)[C@@H](CC)N(Cc1ccccc1)C(=O)CN(c1cccc(F)c1)S(C)(=O)=O
O=C(NC1CCCc2c1[nH]c1ccc(Br)cc21)OCc1ccccc1
Cc1cc(Nc2cc(C(F)(F)F)ccn2)nc(-c2ccc(NC3CCN(C(=O)Cc4ccc(O)c(F)c4)CC3)nc2)c1
CN(C)CCOc1cccc(CN2CCN(C(=O)Nc3ccccc3)CC2)c1
CCCCc1cnc2c(c1SCc1cccc(C(F)(F)F)c1)c(=O)n(C)c(=O)n2C
Cc1ccc(CN2CCC3(CC2)CN(CC(C)C)C3=O)cc1
CCS(=O)(=O)Nc1ccc(N(C)[C@@H]2CCN(c3ncnc4[nH]ccc34)C2)nc1
CN1CCC(COCc2cc(C(F)(F)F)cc(Cl)n2)(c2ccccc2F)CC1
O=[N+]([O-])c1cc(-c2nc(-c3cccnc3)no2)ccc1NCc1ccccc1
Cn1c(CNc2ccccn2)c(C#N)c2ccccc21
CCOC(=O)N1NC(=O)N(c2ccccc2)C1(c1ccccc1)c1ccccc1
CCCCC/C=C\[C@H](C)/C=C\C/C=C\C/C=C\CCCC(=O)NCCO
NC(=O)Cc1ccccc1NC(=O)NCCc1cc(F)cc2c1OCOC2
O=C(Nc1ccccc1)NC1CCc2ccccc2N(Cc2cccc(NC(=O)Oc3ccccc3)c2)C1=O
O=C(O)C(COc1ccccc1)C[C@@H](Cc1ccc(-c2ccccc2)cc1)C(=O)NCc1nn[nH]n1
CC(C)N(C)S(=O)(=O)NCCCc1ccc(N(C)C)cc1
CC[C@H](C)NC(=O)[C@@H](CC)N(Cc1c(Cl)cccc1Cl)C(=O)CCCN(c1cc(C)ccc1C)S(C)(=O)=O
O=C(CCCN1C(=O)NC2(CCCC2)C1=O)Nc1cccc(S(=O)(=O)N2CCCCC2)c1
CC(C)(CN1CCC([C@@]2(C)NC(=O)NC2=O)CC1)N1CCOCC1
COc1cc(C(=O)NC2(C(=O)N[C@H](C)c3ccc(-n4ncc5c4CCCC5)cc3F)CC2)on1
Cc1cc(C2CCC2)c(-c2nc3c([nH]2)CN(C)CC3)cc1C(=O)N1CCC(F)(c2ccc(C#N)cc2)CC1
Cc1cccc(C)c1-c1cc(C)c2nc(Nc3cccc(OCCN4CCCC4)c3)nnc2c1
CC(C)[C@@H]1CN(c2cc(C(=O)NC3CC3)ccn2)CCCN1CC1CC1
CC(C)Cc1nnc(NC(=O)CCc2ccc3c(c2)OCO3)s1
CO[C@@H]1C[C@@H](c2ncn[nH]2)N(C(=O)c2cc(C(C)(C)C)n[nH]2)C1
CCCC(=O)O[C@H]1CC[C@@]2(C)C(=CC[C@H]3[C@@H]4CC=C(C(=O)Cn5cncn5)[C@@]4(C)CC[C@@H]32)C1
C=CCc1cc(C2C3=C(CC(C)(C)CC3=O)N(CCC(=O)O)C3=C2C(=O)CC(C)(C)C3)cc(OC)c1OCc1ccc(Br)cc1
COC(=O)N(C)CC(=O)N1CCCCCC1
COc1ccc(C2=NC(C)(C)N(CC(=O)Nc3cc(OC)cc(OC)c3)C2=O)cc1
Cc1cccc(NC(=O)c2cnn(-c3ccccc3)c2)c1
Cc1occc1-c1nnc2sc(-c3cc(CC(C)C)n[nH]3)nn12
COc1ccc(-c2cc(C(=O)Nc3ccccc3)c3ccccc3n2)cc1OC
O=C(COn1nnc2ccc(C(F)(F)F)cc21)Nc1nnc(-c2ccccc2)o1
COc1cc(/C=N/c2cc(C)c(C)nc2C)c(O)c([N+](=O)[O-])c1
CC(=O)N1CCc2nc3cc([C@H]4CCCCN4C(=O)C(C)(C)C)nn3c(O)c2C1
COc1ccc(CCNCc2cc(-c3ccccc3F)n3c2cnc2cc(Cl)ccc23)cc1OC
COc1cc(/C=C2\CN(CC(=O)O)c3c(C)cccc3C2=O)cc(OC)c1OC
Cc1cc(NC(=O)c2c(NCc3ccncc3)ncn2C)ccc1C(F)(F)F
Cc1ccc(NC(=O)OCc2cccnc2)cc1NC(=O)OCc1cccnc1
CN(Cc1ccccc1NC(=O)c1ccccc1)C(=O)c1ccccc1
CC(C)N1CCC(CCOc2ncc(C(=O)c3ccc(Cl)cc3)n2C)CC1
Cn1c(COc2cccc(C(=O)O)c2)nc2ccc(Oc3ccc(Cl)cn3)cc21
C=C(Br)C(C)(Cl)CCC(Br)C(C)(C)Br
COc1cccc(SC2=C(Cl)C(=O)c3ccccc3C2=O)c1
O=[N+]([O-])c1cnn(COc2cc(Cl)ccc2Cl)c1
C#C[C@]1(O)CC[C@H]2[C@@H]3CCC4=CC(=O)CC[C@@H]4[C@H]3C(=C)C[C@@]21CC
COCCN1C(=O)C(O)=C(C(=O)c2ccc(OC)cc2)[C@@H]1c1ccc(O)c(OC)c1
O=C(c1ccc(Br)cc1)N1CCc2nc(-c3ccccc3)ncc2C1
O=S(=O)(CC1CS1)c1ccc(Oc2ccc(OC(F)(F)F)cc2)cc1
NC(=O)CN(CCc1ccccc1F)C(=O)C1CC(=O)N(CCc2ccc(Cl)cc2Cl)CC(=O)N1CCC(c1ccccc1)c1ccccc1
O=C(Oc1ccccc1C=Nn1c(-c2ccc(Cl)cc2)nc2ccccc2c1=O)c1ccco1
N=C(N)NCc1ccc(/C=C\c2ccc(CNC(=N)N)cc2)cc1
Cn1ncc([N+](=O)[O-])c1C(=O)Nc1ccc2nc(NC(=O)C3CCCCC3)sc2c1
Cc1ccc(-c2cc(C(F)F)nc3sc4c(O)ncnc4c23)cc1
CC(C)C[C@@H](CN)C(=O)N[C@@H]1CCc2[nH]ncc2C1
CCC1=C(C(N)=O)C(c2ccc(F)cc2F)N(C(=O)N2CCC(N3CCC(C(=O)OC)(c4ccccc4)CC3)CC2)C(=O)N1
c1ccc2c(c1)ncn2[C@@H]1C[C@@H]2CC[C@H](C1)N2
Cc1nn[nH]c1C(=O)NCc1ccc2c(c1)nc(C)n2C
Cc1onc(-c2ccc(Br)cc2)c1C(=O)NCCCOC(C)C
Cc1ccc(NS(=O)(=O)c2ccc(/C=C/C(=O)NO)cc2)cc1
Cc1ccc(-c2nc3c(Cl)cc(Cl)cc3c(=O)n2O)cc1
O=C(Nc1ccc(-n2ncc3c(Cl)cccc32)cc1)Nc1ccc(C(F)(F)F)cc1
CN(C1CCN(CCCN2CCc3c(ccnc3Nc3ccc(Cl)c(Cl)c3)C2=O)CC1)S(C)(=O)=O
CC1CCCP(=O)(c2ccccc2)CC1
COCCCN(CC(=O)Nc1cc(C(C)(C)C)nn1-c1ccc(C)cc1C)C(=O)Nc1c(C)cccc1C
CC(C)=CC(=O)C[C@H]1C(=O)O[C@@H]2C[C@H]3C(C)=CC(=O)[C@@H](O)[C@]3(C)[C@@H]3[C@@]24CO[C@@]3(O)[C@H](O)[C@H](C)[C@H]14
O=C(NCCc1c[nH]c2ccccc12)OCCSS(=O)(=O)O
CC1=C[C@@H](C)[C@@]2(CO)CO[C@@H](C)[C@@H]1[C@@H]2C
COc1ccc(C(=O)NCC(=O)N2CCC(c3nc4cc(Cl)ccc4s3)CC2)cc1OC
CCn1nc(C)c2nc(SCC(=O)Nc3cccc(Cl)c3)n(Cc3ccco3)c(=O)c21
O=C(Nc1cccc(Cl)c1Cl)c1ccccc1OCC(=O)N1CCOCC1
CCCC(=O)NCC1CCN(CCOC(=O)c2cc(Cl)c(N)cc2OC)CC1
CCCNC(=O)CN1CCN(c2nccc(OC)n2)CC1
NC1=N[C@@H](Cc2ccccc2)CO1
CN(C(=O)CC1C(=O)NCCN1Cc1ccccc1C(F)(F)F)C1CCOCC1
CCn1c(SCC(=O)Nc2cccc(Br)c2)nnc1-c1cccnc1
CC1=CC(=O)[C@@H](O)[C@@]2(C)[C@H]1C[C@H]1OC(=O)[C@H](O)[C@H]3[C@@H](CO[C@@H]4O[C@H](CO)[C@@H](O)[C@H](O)[C@H]4O)[C@@H](O)[C@H](O)[C@H]2[C@]31C
C=CC(=O)N1CCC[C@@H](n2nc(-c3cccc(C(=O)Nc4ccc(F)c(F)c4)c3)c3c(N)ncnc32)C1
O=S(=O)(c1ccc(-c2cc(C(F)(F)F)on2)s1)N1CC=C(c2ccccc2)CC1
Cc1cnn(C2CCCN(C(=O)c3cc[nH]n3)C2)c1
O=C(Nc1nc2ccc(Cl)cc2s1)[C@@H]1C[C@H]2CC[C@H]1C2
Nc1nc(CN2CCN(Cc3ccccc3)CC2)nc(Nc2ccc(Oc3ccccc3)cc2)n1
C[C@@](O)(CNS(=O)(=O)c1ccccc1)c1ccccc1
Fc1cccc(-c2nccnc2C2CCCNC2)c1
CCO[C@@H]1CCCN(c2ncnc3c2cnn3C)C1
COC(=O)c1ccc(N2CCN(C)CC2)c(NC(=O)/C=C/c2ccccc2)c1
CC(C)C(NC(=O)C1CCCN1C(=O)[C@@H](NC(=O)c1ccc(Oc2ccccc2)cc1)C(C)C)C(=O)C(F)(F)F
Cc1csc(NS(=O)(=O)c2ccccc2C(F)(F)F)c1-c1nc2ccccc2s1
O=C(O)c1cccc2[nH]c(C(F)(F)F)nc12
CCOC(=O)c1[nH]c(COC(=O)c2c3c(nc4ccccc24)/C(=C\c2ccc(O)cc2)CCC3)c(C(=O)OCC)c1C
Cc1ccc(CN(c2ccc(C(=O)NCC(C)C)cc2)S(C)(=O)=O)cc1
Cc1ccccc1[C@@H]1SCc2nc3ccccc3n21
CCOC(=O)C(=O)N1N=C(C(F)(F)F)C[C@@]1(O)C(C)(C)C
O=C(Cc1ccccc1Cl)/N=C1/S[C@H]2CS(=O)(=O)C[C@@H]2N1c1ccc(OCc2ccccc2)cc1
CCc1ccc(C2CC(=O)c3c([nH]c(C(=O)OCc4ccc(C)cc4)c3C)C2)cc1
NCCCC[C@H](N)C(=O)O
CN(C)CCNC(=O)c1ccc(F)c([N+](=O)[O-])c1
CCCC[C@@H]1C[C@H]1C(NC(=O)c1ccc(-c2ccccc2)cc1)c1ccc(-c2ccccc2)cc1
O=C(CCCc1ccccc1)NC[C@]12CCC=C1NC(=O)CC2
Cc1ccc(Cc2cnc(SCCCCCCCCc3ccccc3)nc2O)cn1
C[C@@H](NC(=O)c1ccc(CN2C(=O)CNC2=O)cc1)c1ccccc1F
Cc1ccc(C)c(S(=O)(=O)Nc2cnc(Br)cn2)c1
CN(C)CCOc1cnc2nnn(Cc3ccc4ncccc4c3)c2n1
CCN(CC)CCNC(=O)Nc1nc2ccc(-c3cnc(OC)c(NS(=O)(=O)c4ccc(F)cc4)c3)cc2s1
O=C(O)Cc1ccc2oc(-c3ccc(NC(=O)/C=C/c4ccc(Br)cc4)cc3)nc2c1
CC(C)C(=O)Nc1ncc([S+]([O-])Cc2ncc(C(C)(C)C)o2)s1
CCCN1C(=O)C(C)(C)COc2ccc(NC(=O)c3ccc(Br)cc3)cc21
COc1cccc(CN(C(=O)COc2cc(C)c(Cl)c(C)c2)[C@H](Cc2ccccc2)C(=O)NCC(C)C)c1
O=C(COC(=O)c1cc(S(=O)(=O)N2CCOCC2)ccc1Cl)NCc1ccco1
COc1ccc(-c2csc(Cn3ccnc3)c2)cc1OC
Cc1ccc(CN2C(=O)[C@H]3[C@H](C(=O)Nc4ccc(F)cc4)[C@@]4(C)C=C[C@@]3(O4)[C@H]2C(=O)NC2CCCCC2)cc1
COc1cccc(CN/C(=N/C#N)NCC23CC4CC(CC(C4)C2)C3)c1
CCOC(=O)[C@H](Cc1ccccc1)NP(=O)(CCN(CCC(=O)OC)CCn1cnc2c(=O)[nH]cnc21)N[C@@H](Cc1ccccc1)C(=O)OCC
COCc1ccc(SCCNC(=O)C2CCCC2)cc1
CC(=O)c1[nH]ccc1O[C@@H]1O[C@H](C)[C@@H](O)[C@H](O)[C@H]1O[C@@H]1O[C@H](C)[C@@H](O)[C@H](O)[C@H]1O
C[C@@H]1O[C@@H](Oc2c(-c3ccc(O)cc3)oc3cc(O)cc(O)c3c2=O)[C@H](OC(=O)/C=C/c2ccc(O)cc2)[C@H](OC(=O)/C=C/c2ccc(O)cc2)[C@H]1O
CCOc1ccc([C@@H]2CN(Cc3ccccc3)CC[C@@H]2NCc2ccc(OC(F)(F)F)cc2)cc1
CC/C=C\CCCCCCCCCCCCCC(N)=O
COc1ccc(NS(=O)(=O)c2cccc(C(=N)N)c2)cc1OC
CCc1ccc(CC)c(CNC(=O)CN(c2ccc(C)c(Cl)c2)S(C)(=O)=O)c1
CC(=O)Nc1nc(-c2ccc(C)c(C)c2)c[nH]1
COc1ccc(/C=C/Sc2nc(C(C)c3c(Cl)cccc3Cl)c(C)c(=O)[nH]2)cc1
Cc1cc(CCN2CCC(=O)NC2=S)ccc1OC(C)C
COc1ccc(CN2CCC(=O)N([C@H](CO)c3ccccc3)CC2)cc1OC
COc1cc(/C=C/C(=O)Nc2cc(Cl)ccc2C)cc(OC)c1OC
C[C@H](Nc1nc(N[C@H](C)C2CC2)nc(-c2cccc(C(F)(F)F)n2)n1)C1CC1
O=C(COc1ccc(F)cc1)N(Cc1ccco1)c1ccc(Cl)cc1
CCN(CC)CCN1C(=O)C(=O)/C(=C(/O)c2ccc(OC)cc2C)[C@H]1c1ccccc1
Cc1c(CCC(=O)N2CC[C@@]3(O)CCCC[C@H]3C2)c(=O)oc2c(C)c3occ(-c4ccc(Br)cc4)c3cc12
C=CCNC(=O)C(=O)NC[C@@H]1OCCCN1S(=O)(=O)c1ccc(F)cc1C
CC[C@@H](C)NC(=O)[C@H](C)N(Cc1ccc(Cl)c(Cl)c1)C(=O)CN(c1ccc(OC)c(OC)c1)S(=O)(=O)c1ccc(C)cc1
Cc1ccc(Nc2cc(NCC3CC3)n3ncc(/C=C4\NC(=O)NC4=O)c3n2)nc1
CC(C)(CO)CCCn1cncc1-c1cnn(-c2ccc(Cl)cc2)c1
Cc1nn(C)c(NCc2ccc(-c3cccs3)s2)c1[N+](=O)[O-]
COc1cccc(CS(=O)(=O)c2cc(OC)c(OC)cc2C)c1
COc1ccc(S(=O)(=O)c2nnn(-c3cccc(OC)c3)c2N)cc1
Cc1cccc2c(CN3CC[C@@H](CNC(=O)CO)C3)cccc12
CC(C)C[C@H](N)C(=O)N[C@@H](CCCN)CC(=O)NN(C)CC(=O)OCc1ccccc1Br
CNC(=O)C(=O)Nc1ccc2c(c1)N(C(C)=O)CCC2
CCOc1ccc(NC(=O)OCCN2CCN(CCc3ccccc3)C(C)C2)cc1
COc1cccc(CNC(=O)C2Cc3ccccc3CN2C(C)=O)c1
COc1ccc(Cc2nc(O)c3c(C)nc([C@@H](CCCc4ccccc4)[C@@H](C)O)n3n2)cc1OC
CC1=NN(c2nc3ccccc3[nH]2)C(=O)/C1=C\Nc1ccc(C)cc1
Cc1n[nH]c(C)c1CCN(C)C(=O)C(c1cccnc1)N1CCOCC1
CCCCCCC(=O)OCC1(CO)C/C(=C/C(CC)CCCC)C(=O)O1
COc1ccc([C@@H]2[C@H](C(=O)N3CCN(c4ccccc4F)CC3)CCC(=O)N2C)cc1
CC(C)[C@@H](NS(C)(=O)=O)c1ccc2c(c1)OCCO2
CCOC(=O)C1CCN(C(=O)/C(=C\c2ccc(F)cc2)c2ccsc2)CC1
C[C@H]1CCCN(S(=O)(=O)c2cnn(C)c2)C1
CCCC(=O)Nc1ccc(CCc2nc3cc(C(=O)NC4CCCC4)ccc3[nH]2)cc1
CCOc1cc(C=Nn2c(-c3cc4c(OC)cccc4o3)nc3ccccc3c2=O)c(Br)c(Cl)c1OCC(C)(C)C
CCC1Cc2cc(OCCN3CCCC3)c(OC)cc2-c2cc(=O)c(C(=O)O)cn21
CCC(CC)n1ncc(C(=O)N2CC(CN3CCN(C)CC3)C2)c1C
CS(=O)(=O)c1ccc(-c2cncc(-c3cc4cc(O)ccc4[nH]3)n2)cc1
COc1ccc(CN(CC(=O)NCc2ccc(F)cc2)C(=O)c2csnn2)cc1
CCS(=O)(=O)Nc1cc2c3c(c1)CCN3C(=O)CC2
Cc1cc(C)cc(OCCSc2nnc(N)[nH]2)c1
CCCCCCCCCCCC(=O)Nc1ccccc1C(=O)OCC(=O)Nc1cc(C)c(Br)c(C)c1
O=c1cc(-c2c[nH]c3ncccc23)nc(-c2ccccc2)[nH]1
O=C(NCC(c1ccccc1)c1ccccc1)c1ccc(-n2cc(NC(=O)C3CCOCC3)cn2)cc1
CCC(=O)/N=C1\S[C@@H]2CS(=O)(=O)C[C@@H]2N1c1cc(Cl)ccc1C
O=C(Nc1ccc(OC(F)(F)F)cc1)[C@@H]1CCCN(S(=O)(=O)c2cccs2)C1
Cc1cc(C)c(C(=O)CN2C(=O)N[C@@]3(CCCC[C@@H]3C)C2=O)cc1C
O=C(CNS(=O)(=O)c1ccc(Cl)cc1)NNC(=O)c1cccnc1
COc1ccc(C(=O)CCc2cc[n+](Cc3cccc(Cl)c3)cc2C(N)=O)cc1OC
CCOC(=O)C1=C(COC(=O)CCc2nc3sc4c(c3c(=O)[nH]2)CCCC4)NC(=O)N[C@@H]1C
CC(=O)N1CCN(C(=O)c2cccc(CSc3ncnc(NC(=O)c4ccc(N(C)C)cc4)n3)c2)CC1
Cc1cc(N2C[C@H]3CN[C@H]3C2)cnc1Cl
O=C(OCC(=O)N1CCc2sccc2C1)c1cc(-c2ccco2)nn1-c1ccccc1
CSc1cccc(NC(=O)CN(c2ccc([N+](=O)[O-])cc2)S(=O)(=O)c2ccccc2)c1
CC12CC/C(=N/NC(N)=O)C3C1CCCC32
CCCCN(C)C(=O)NC1CCC(Oc2ccc(C#N)cn2)CC1
C[C@@H]1CCCCN1C(=O)c1ccc(N2CCCCCC2)nc1
CCOc1cccc2c(C)ccnc12
C[C@H]1C(=O)C(C)(C)Nc2ccc3c(c21)[C@H](c1cccc(C(F)(F)F)c1)Oc1ccccc1-3
CC(=O)N1CCC(C(=O)N2CCC(N3CCN(C(=O)c4cc(-c5ccccc5)nc(-c5ccc6c(c5)c(C)cn6C)c4)CC3)CC2)CC1
CC(C)(C)[C@@H]1C/C(=C\c2ccccc2Br)c2nc3ccccc3c(C(=O)O)c2C1
CCc1ccc(CN(C(=O)COc2ccc(Cl)c(C)c2)c2ccccn2)cc1
CCCOc1cc(C(=O)NC2CC3CCC(C2)N3C)c2ccccc2n1
Cc1cc2nc(C(=O)Nc3ccccc3CN3CCOCC3)cc(C)n2n1
Brc1ccc(Nc2ccccc2)cc1
Cc1cccc(NC(=O)Nc2nnc(N(C)Cc3ccccc3)s2)c1
Cc1c(-c2nc(-c3ccncc3)no2)cccc1[N+](=O)[O-]
CC(C)N(C(=O)Cn1cc(SCC(=O)Nc2ccccc2F)c2ccccc21)C(C)C
CCN(CC)c1ccc(/C=C2\CCC(C=NN=c3sc4ccccc4n3C)=C2N2CCOCC2)cc1
NS(=O)(=O)c1ccc(CNC(=O)[C@@H]2Cc3ccccc3S2)cc1
Cc1ccc(COc2ccccc2/C=N/O)cc1
Cc1ccc(C(=O)N/C(=C\c2cccs2)C(=O)NCCc2c[nH]c3ccccc23)cc1C
COc1ccc([C@H]2C[C@@H](c3cccc(Cl)c3)n3ncnc3N2)cc1
COc1cc2c(cc1-c1nccn1Cc1ccccn1)CCC2
COc1ccccc1[C@H]1CC(O)=Nc2sc3c(C)c(C#N)c(N)nc3c21
CN1/C(=C/C(=O)CSc2nc(C(F)(F)F)nc3ccccc23)C(C)(C)c2ccccc21
Cc1cc(/C=C2\SC(=O)N(CC(=O)N3CCOCC3)C2=O)c(C)n1-c1ccccc1
Cc1cccc(CS(=O)(=O)N2CCC(C(=O)Nc3ccccc3Oc3ccccc3)CC2)c1
Cc1cccc(S(=O)(=O)c2c(C)cc(C)nc2Cl)c1
Cc1nccn1CC(O)COc1ccc(Cl)cc1Cl
CN(C)c1nc(CCC2CCN(C(=O)C3CCOCC3)CC2)no1
Cn1ncc2c(NCCO)nc(NC3CCOCC3)nc21
O=C(NCCc1ccccn1)[C@@H]1CCCN(S(=O)(=O)c2ccc(Br)cc2)C1
CNC(=O)[C@@H]1CCC[C@@H]1N[C@@H](C)C(=O)Nc1cccc(C#N)c1
Cc1ccc(NC(=O)CSc2nnc3nc(C)cc(C)n23)cc1
O=C(c1cc2ccccc2o1)N1CCN(c2cccc(Cl)c2)CC1
Cc1c(Cl)cccc1NC1=NC(=O)/C(=C/c2ccc(C(=O)O)cc2)S1
S=C(N/N=C\c1ccccc1)N1CCN(c2ccccn2)CC1
O=C(NCCCn1ccnc1)c1cc(Br)c(Br)s1
NC(=O)[C@H]1CC(C(=O)NCC(=O)Nc2ccc(F)c(F)c2)=NN1c1ccc(F)cc1
C=CCN1C(=O)/C(=C/c2ccc(OCC(=O)Nc3cc(C)ccc3C)c(OC)c2)SC1=S
CCCN1CCC2(CC1)COc1ccccc1S(=O)(=O)N(CC1CC1)C2
CN(C/C=C/C1CCCCC1)Cc1ccc2c(c1)OCO2
CN(C)/C(F)=P\C(F)(F)F
O=C1CCCc2ccccc2N1Cc1ccc(Cl)cc1Cl
Cc1ccc(OCC(=O)O/N=C(\N)Cc2ccc([N+](=O)[O-])cc2)cc1
Cc1ccccc1C(=O)N(C)c1ccc(C(O)(C(F)(F)F)C(F)(F)F)cc1
N#CC1=CC2(c3ccccc3Nc3ccccc32)N(/N=C/c2ccc(Cl)cc2)C1=O
COC(=O)c1ccc(NC(=O)N2CCCCCC2)c(C)c1
COC(=O)[C@H]1Cc2c([nH]c3ccccc23)CN1S(=O)(=O)c1cccc2cccnc12
Cc1cc(Br)ccc1NC(=O)CN(CCCO)C1CC1
Cc1ccc(S(=O)(=O)N(C)Cc2nc3cc(C(=O)N(C)C)ccc3n2C)c(C)c1
O=C(Nc1ccc(CSc2ccccc2)cc1)[C@H]1CCCN(S(=O)(=O)Cc2ccc(Cl)cc2Cl)C1
Cc1cc(N2CC[C@H](N[C@@H]3CCCC[C@H]3C(N)=O)C2=O)n(C)n1
CCCCNC(=O)[C@H](C)N(Cc1cccc(Br)c1)C(=O)CN(c1cc(C)ccc1OC)S(=O)(=O)c1ccc(C)cc1
Nc1nn2c(=O)cc(-c3ccc4c(c3)OCCO4)[nH]c2c1-c1ccccc1
Cc1cccc(-n2c(SCC(=O)Nc3ccc(Br)cc3)nc3sc4c(c3c2=O)CC(C)(C)SC4)c1
CCOC(=O)[C@@H](C)Oc1c(OC)cc(C=Nn2c(-c3cc4ccccc4o3)nc3ccccc3c2=O)cc1[N+](=O)[O-]
C=CCn1c(N)c(C(=O)OC(C)(C)C)c2nc3ccccc3nc21
CN(C)CCCNC(=O)c1cc2c3ccccc3[nH]c2c2sccc12
N#CCSc1ccccc1NC(=O)COc1ccccc1Br
CN(C(=O)COC(=O)c1cc(Br)ccc1N)C1CCCCC1
CN(CCNC(=O)c1ccnc(-n2ccnc2)c1)C1CC1
Cc1cccc(OCC2=NN3C(=N)/C(=C/c4c[nH]c5ccccc45)C(=O)N=C3S2)c1
CCOC1CC2(CCN(C(=O)[C@H](C)NC(=O)c3cccc(C)c3)C2)C1
CCCC/N=C(/C=N/O)N(C)C
COc1ccccc1[C@H]1C(C(=O)Nc2ccccc2F)=C(C)NC2=C1C(=O)C[C@H](c1ccccc1)C2
C[C@H]1CN(c2nc(N3CCOC[C@@H]3C)c3ccc(-c4ccc([N+](=O)[O-])cc4)nc3n2)C[C@@H](C)O1
CCN(Cc1ccncc1)[C@@H]1CCCN(S(=O)(=O)c2ccc(F)cc2Cl)C1
O=C(COc1ccc(OCCCCCc2ccco2)cc1)COc1ccc(C(=O)O)cc1
COc1ccc(CCNC(=O)Cn2c(=S)[nH]c3ccccc3c2=O)cc1OC
NC(=O)c1ccc(-c2cc(-c3nnn[nH]3)cc(-n3cc(-c4ccc(C(F)(F)F)cc4)nn3)c2)cc1
CCC1CCCCN1C(=O)COc1ccc2c3c(c(=O)oc2c1)CCC3
Cc1ccc(-n2nc(C(=O)Nc3ccc(C)c(F)c3)c3c4ccccc4n(C)c3c2=O)cc1
O=C(c1ccc(-c2ccccc2Cl)o1)N1CCc2ccccc2C1
Cc1c(C(=O)O)c2cc(O)c(Br)cc2n1C1CCCCCC1
COC(=O)c1cc(-c2cccc([N+](=O)[O-])c2)c2c(=O)n(C)c(=O)n(C)c2n1
CN(C)CCOc1ccc(/C(=C(/CCCO)c2ccccc2)c2ccc(O)cc2)cc1
O=C(Nc1ccc(-c2ccc(NC(=O)C3CCN(C(=O)c4ccc(F)cc4)CC3)cc2)cc1)C1CCN(C(=O)c2ccc(F)cc2)CC1
CC(=O)c1ccc(NC(=O)NCCCN(C)Cc2ccccc2)cc1
O=C(Cc1ccccc1)Nc1nn(-c2ccccc2)c(=O)c2ccccc12
Cc1c(C(=O)[C@H](C#N)c2ccc(C(F)(F)F)cn2)cccc1[N+](=O)[O-]
O=C(Cn1ncc2c([nH]c3ccccc32)c1=O)N1CC[C@@H](c2ccccc2)C1
COc1ccc(CC(=O)Nc2nc(-c3ccccc3)c(C(=O)c3ccccc3)s2)cc1OC
COC1C(CO)OC(n2c3ccccc3c3c4c(c5c6ccccc6[nH]c5c32)C(=O)N(CCCCOC(=O)CBr)C4=O)C(O)C1O
COCCCNC(=O)CN1C(=O)c2cccnc2Sc2ccccc21
C=C(C)[C@@H]1CC[C@]2(COC(C)=O)CC[C@]3(C)[C@H](CC[C@@H]4[C@@]5(C)C=C(N)C(=O)C(C)(C)[C@@H]5CC[C@]43C)[C@@H]12
COc1cccc(-n2c([S-])c(C(=O)Nc3ccc(C(F)(F)F)cc3)[n+]3ccccc23)c1
CC(CO)/N=C(\N)c1c(O)nsc1Nc1ccc(Oc2cccc(C(F)(F)F)c2Cl)c(F)c1
CC(C)=CC1C(C(=O)NCCc2ccccc2)C1(C)C
CCOc1ccc([C@@H](C(=O)NC2CCCCC2)N(C(=O)Cn2nnc3ccccc32)c2ccc(C(C)=O)cc2)cc1
CCOC(=O)NC(=S)N1[C@@H](C)CCC[C@@H]1C
O=C(Nc1cccc(S(=O)(=O)N2CCOCC2)c1)C1CC1
N#[N+]c1ncc(CC(=O)[O-])s1
Cc1cc(C(=O)CSc2nnc(-c3ccco3)o2)c(C)n1C
Cc1cc(C)c2nc(C)cc(C(=O)N3CC(O)CO3)c2c1
Cc1c(/C=C2\SC(=S)N(NC(=O)c3ccccc3)C2=O)c2ccccc2n1C
O=C(NC(=S)Nc1nc2cc([N+](=O)[O-])ccc2s1)c1ccc([N+](=O)[O-])cc1
Nc1nc(N)c2nc(COC(=O)c3ccc(C(=O)N[C@@H](CCC(=O)O)C(=O)O)cc3)cnc2n1
COc1ccc(Cl)cc1C(=O)NCCn1nc(-c2cccs2)n(C)c1=O
CC1CCCN(CCNC(=O)c2ccn(-c3cccc(F)c3)n2)C1
Cc1ccc(S(=O)(=O)NCC(=O)N2Cc3ccccc3[C@@H](OCc3ccccc3)[C@@H]2CO)cc1
CNC(=O)[C@H]1CC[C@@H](C(=O)O)N(C(=O)c2cc(F)ccc2F)C1
C=CC(=C)CC[C@@H]1[C@@](C)(O)C[C@@H](O)[C@@H]2[C@@](C)(CO)CCC[C@@]12C
COc1ccc(NC(=O)c2cc3c(CO)cnc(C)c3o/c2=N\c2cccc(F)c2)c(OC)c1
CNS(=O)(=O)c1cc(NC(=O)c2cnc(SC)n2-c2ccccc2)ccc1C
COc1ccc(C(CNC(=O)c2ccc(S(=O)(=O)N3CC(C)CC(C)C3)cc2)N(C)C)cc1
O=C(C1=C(O)C(=O)N(C[C@@H]2CCCO2)[C@@H]1c1ccc(F)cc1)c1ccccc1
COCCCN[C@@H]1CCN(Cc2ccc(OC)cc2)C[C@H]1O
CC(=O)Nc1ccc(Nc2nnc3cc(-c4cc(O)ccc4Cl)cc(C)c3n2)cn1
C#CCOc1ccc(/C=C2\C(=O)NC(=O)N(c3cccc(Br)c3)C2=O)cc1OCC
COc1ccc(C(=O)C2CCN(CC(=O)NCc3nc4c(c(=O)[nH]3)COCC4)CC2)cc1C
COc1ccc(NC(=O)/C(=C/c2cc(C)n(-c3cccc(Cl)c3)c2C)C(C)=O)cc1
CCCOC(=O)C1=C(C)NC2=C(C(=O)CC(c3ccc(Cl)cc3)C2)C1c1ccc(Br)cc1
Cc1ccc2cc(CN3CCC(CC(N)=O)CC3)c(=O)[nH]c2c1
Cc1nc(C)c(CC(=O)N2CCOC[C@H](Cc3ccncn3)C2)s1
CCCCCCCCCCCCCC(=O)C(F)(F)F
CCC[C@@H](NC(=O)[C@@H](C)c1ccc(Cl)s1)c1nnn[nH]1
Cc1oc(C)c(C(=O)NCCc2nnc3n2CCC3)c1C
CCN(CC)C(=O)CCNC(=O)c1ccc2cc(Oc3ccc(C(F)(F)F)nc3)ccc2n1
CC(=O)Nc1ccc(S(=O)(=O)c2c(N)n(CCN3CCOCC3)c3nc4ccccc4nc23)cc1
CN(C)C(=O)c1cncc(NC2CCN(CCc3ccccc3)CC2)n1
Cc1ccc(S(=O)(=O)N2CCc3c(sc(N)c3C(=O)c3ccccc3)C2)cc1
COc1cccc(C(=O)C[n+]2ccn(C)c2)c1
C[C@H]1CN(CCc2ncc(-c3cccc([N+](=O)[O-])c3)o2)[C@H](C)CO1
CC(=O)N1CCCC1c1ccc(C(=O)N2CCOCC2)s1
COCCC1CN(c2ccc(Cl)c(Cl)c2)NC1=O
CC(=O)NC1CCC(Nc2ccc(C)cc2OC[C@H]2CCCO2)CC1
CC(C)NC(=O)[C@H]1CC[C@@H](n2c(N)nc3ccc(CN4CCC(C(C)(C)O)CC4)cc32)CC1
C[C@@H](CC(=O)[C@@H]1OC1(C)C)[C@@H]1CC[C@]2(C)C3=CC[C@H]4C(C)(C)C(=O)CC[C@]4(C)[C@H]3CC[C@@]12C
NCCNc1cccc2c1C(=O)N(C1CCC(=O)NC1=O)C2=O
COc1ccc2nc(NC(=O)Cn3cc(C(F)(F)F)cc(Cl)c3=O)sc2c1
O=C(/C=C/c1ccc(N2C(=O)c3ccc(Oc4cccc([N+](=O)[O-])c4)cc3C2=O)cc1)c1ccccc1
COc1ccc(-c2ccc(CCNC(=O)c3ccc4c(c3)C3(C)CCN(CC5CC5)C(C4)C3C)cc2)cc1C
COc1ccc(C(=O)[C@@H]2CCCN(Cc3ccccc3O)C2)c(OC)c1
COc1cc(/C=C2/SC(=O)NC2=O)ccc1OCc1ccc(F)cc1
Cc1cccc(CS(=O)(=O)N2CCC(C(=O)Nc3ccccc3C(=O)N3CCOCC3)CC2)c1
CCN(c1ccc(C(=O)N[C@@H](C)c2cc(C)ccc2C)cc1)S(C)(=O)=O
COc1ccc(N/N=C2\C(=O)NN=C2c2cc(OC)c(OC)c(OC)c2)cc1
CCCCCC(=O)Nc1nc(-c2ccccc2)cc(-c2ccccc2)n1
Cc1c(C(=O)NCCCS(C)(=O)=O)cccc1-c1ccccn1
O=[N+]([O-])c1cc2c(c(CN3CC[C@@H](c4ccccc4)C3)c1)OCOC2
CC(c1ccc(Cl)c(Cl)c1)n1cnc2cc3c(cc21)CCCC3
CCOc1ccccc1N(CC(=O)N(Cc1cccc(Br)c1)[C@@H](C)C(=O)NC1CCCC1)S(=O)(=O)c1ccc(Cl)cc1
O=C(O)c1c(-c2ccc3[nH]ccc3c2)sc2c(C3CC3)c(Cc3cccc4ccccc34)cc(=O)n12
COCCNC(=O)c1ccc(OCC2CCOCC2)nc1
CC(C)CNC(=O)CSc1nnc(-c2cccnc2)n1-c1ccc(Cl)cc1
CC(C)CNc1cc(N2CCCC2)ccc1[N+](=O)[O-]
CNC(=O)c1coc2c(O[C@H](C)c3c(Cl)ccc(F)c3Cl)c(N)ncc12
Cc1cccc(OC2CN(C(=O)C3CC(=O)N(C(C)(C)C)C3)C2)c1
O=C(NCCCCCCN1C(=O)CSC1=O)c1ccccc1
O=C(CN1CCO[C@H]2CCCC[C@H]21)NC(=O)Nc1ccccc1
OCCCN=c1[nH]c(-c2ccncc2)cc(=NCc2cccc(F)c2)[nH]1
OC[C@@H]1CCN(c2nccnc2Oc2ccc(Nc3ccccn3)cc2)C1
Cc1ccc(NC(=O)N2CCCC2C(=O)NCc2ccccc2Cl)cc1
CC[C@H](C)NC(=O)[C@H](C)N(Cc1cccc(C)c1)C(=O)CSCc1c(F)cccc1Cl
Cc1c(C(=O)N(Cc2cccs2)C2CCS(=O)(=O)C2)oc2ccccc12
Oc1cccc2c(S[C@@H]3OC[C@@H](O)[C@H](O)[C@H]3O)cccc12
CCN(CC)CCOC(=O)c1ccc(NC(=O)c2ccc(OC)cc2)cc1
COc1cccc(CCC(=O)N2CCN(c3ccccc3)CC2)c1OC
Cc1cc(C(=O)N(C)C)cc(C)c1OCC(=O)N[C@@H](Cc1ccccc1)C[C@H](O)[C@H](Cc1ccccc1)NC(=O)O[C@H]1COC2OCCC21
Cc1cc(C)cc(CSCC(=O)NN=C2CCCCCC2)c1
O=C(Cn1ncc2c3ccccc3nc-2c1O)Nc1ccc(CN2CCCCC2)cc1
Cn1cc(S(=O)(=O)N[C@@H]2CC[C@H]3CCCC[C@H]3C2)c(=O)n(C)c1=O
Nc1cc(Cl)ccc1-n1ccc2ccccc21
O=C(Nc1ccccc1C(=O)NC(Cc1ccccc1)C(=O)NC1CCCCCC1)c1ccccc1
C=C(C)[C@@H]1CC[C@]2(C(=O)NOC)CC[C@]3(C)[C@H](CC[C@@H]4[C@@]5(C)CC[C@H](OC(C)=O)C(C)(C)[C@@H]5CC[C@]43C)[C@@H]12
CC(C)c1nnc2n1CCN(Cc1ccc(-n3ccnc3)cc1)C2
COC(=O)[C@H](CC(N)=O)n1ccnc1-c1ccc(-n2ccnc2)cc1
COc1ccc(/C=C2\C(=O)NC(=S)N(c3ccc(Cl)cc3)C2=O)c(OC)c1OC
CCNCc1nc(O)c2ccc(Cl)cc2n1
Cc1ccc(N2CC(NC(=O)Cc3cccs3)CC2=O)cc1
COC(=O)c1c(NC(=O)C(=O)NCCCN2CCOCC2)sc2c1CCC2
COCCNC(=O)[C@H]1C[C@H](Oc2ccccc2)CN1S(=O)(=O)c1cccc(OC)c1
COc1ccc(CN2CCCC[C@H]2c2nc(C)ncc2C(=O)NCc2ccccc2)cc1
Cc1ccc(CNC(=O)c2ccc3c(c2)NC(=O)[C@@H](CSCc2ccccc2C)N3)cc1
Cc1c(C(=O)Nc2ccccc2[N+](=O)[O-])csc1-c1ccccc1
CCCCCNC1CCc2c(cccc2OC)C1
CNc1cc(CN(C)Cc2ccc(N3CCCC3)c(F)c2)nc([C@H]2CCCN2C(C)=O)n1
Cc1ccccc1NC(=O)Nc1ccc(-c2coc3ncnc(N)c23)cc1
Cc1cc(C)n(CCOC2CC(=O)Nc3c2c(C)nn3-c2ncnc3nc[nH]c23)n1
CNC(C(=O)c1ccccc1)C(OC(C)=O)c1cccc([N+](=O)[O-])c1
COCC(=O)Nc1ccc(NC(=O)CCC2CCN(C)CC2)cc1OC
CCCCNCC[C@@H](O)c1cc2ccc(C(F)(F)F)cc2c2cc(C(F)(F)F)ccc12
c1ccc(-c2ccnc(SC34CC5CC(CC(C5)C3)C4)c2)cc1
CCOc1ccc(C[C@@]2(CN3C[C@H]4C[C@H](C3)c3cccc(=O)n3C4)C(=O)N(c3ccc(OC)cc3)C(=O)N=C2O)cc1
COC(=O)Cc1cccc(CN2C(=O)N(Cc3ccc4[nH]ncc4c3)[C@H](Cc3ccccc3)[C@H](O)[C@@H](O)[C@H]2Cc2ccccc2)c1
O=c1c(-c2ccco2)nnc2n(Cc3ccccc3)c3ccccc3n12
O=c1c(-n2ccnn2)c[nH]n1-c1cc(N2CCSCC2)ncn1
CCOC(=O)[C@H](C)NC(=O)[C@H](Cc1ccccc1)C(=O)Nc1ccc2c(c1)OCC(=O)N2Cc1ccc(C(=N)N)cc1
CCc1ccc(Nc2c(-c3ccc(C(C)C)cc3)c(=O)c2=O)cc1
CCCOc1cnn(Cc2cccc(N)c2)c1
Cc1ccc2[nH]c3ccc(C(F)(F)F)cc3c2c1
Nc1n[nH]c2cc(-c3cncc(Cl)c3N3CCC4(CCNC4=O)CC3)ccc12
Cc1ccc2oc(-c3ccc(C)c(NC(=O)COc4ccc(Cl)cc4Cl)c3)nc2c1
CN(Cc1ccc(-n2cccn2)cc1)C(=O)c1conc1-c1ccccc1
O=C(CCN1CCCCC1)N1CCC(Cc2ccc(CO)cc2)C1
CCC1(CC)Cc2ccccc2C2=C(C(=O)N3CCCCC3)C(=O)C(=O)N21
CCCCCCCCCC(=O)OC(CCN1CCN(CCOC(c2ccc(F)cc2)c2ccc(F)cc2)CC1)c1ccccc1
CCCCc1nn(-c2ccc(C)cc2)c(=O)n1Cc1ccc(-c2ccccc2-c2nn[nH]n2)cc1
Cc1ccc2sc(-c3ccc(/N=C/c4cc(Cl)cc([N+](=O)[O-])c4O)cc3)nc2c1
CC[C@@H](C(=O)NC(C)(C)C)N(Cc1cccc(OC)c1)C(=O)CN(c1cccc(C)c1C)S(=O)(=O)c1ccccc1
CC[C@H](C)NC(=O)[C@H](C)N(Cc1cccc(Cl)c1)C(=O)COc1ccc(OC)cc1
COc1ccc(C(=O)n2nnc3ccccc32)cc1Br
O=[N+]([O-])c1ccc(OCc2ccccc2)c(/C=C2\SC(=S)N=C2O)c1
CCOC(=O)c1ccc(N2C(=O)C(O)=C(C(=O)c3ccc(OC)cc3)C2c2ccccc2F)cc1
O=C(O)c1ccc(CN2CCC(CNC(=O)c3c4n(c5ccccc35)CCCO4)CC2)cc1
O=C1CC[C@H](c2ccccc2Cl)CN1
CC(C)[C@@H](NC(=O)[C@H](C)Oc1ccc(Cl)cc1)c1ccc2c(c1)OCCCO2
O=[N+]([O-])c1ccc(NS(=O)(=O)c2cccc(C(F)(F)F)c2)c(F)c1
Cc1ccccc1/N=C1\S/C(=C2\Sc3ccccc3N2C)C(=O)N1Cc1ccccc1
C=C(COc1ccccc1C(=O)OCC)C12CC3CC(CC(C3)C1)C2
COc1ccc(C(=O)Nc2ccc(NC(=O)C3CC3)cc2)c(F)c1
COc1ccc(OC(C)C(=O)N(C)Cc2nc(-c3ccc(OC)cc3)no2)cc1
N#CCC1(n2cc(C(N)=O)c(Nc3ccc(F)cc3)n2)CCC(NCCO)CC1
COc1ccccc1CNC(=O)CCCNS(=O)(=O)c1cccc2nsnc12
COc1ccc(NC2=C[C@H](c3ccc(C(C)C)cc3)N(c3ccc(OC)cc3)C2=O)cc1
CCn1ncc(C)c1CNCc1cnn(CCF)c1
Cc1cc(C)c(C[C@H]2CCC[C@H](Cc3c(C)cc(C)cc3C)C2=O)c(C)c1
CCO/C(O)=C1\C(C)=NC(C)=C(C(=O)OCCN(C)Cc2ccccc2)C1c1cccc(-n2ccnc2)c1
N#Cc1ccc(CNC(=O)CCc2ccc(Br)cc2F)c(F)c1
CC(=O)Nc1c([N+](=O)[O-])ncn1[C@@H]1O[C@@H](COC(C)=O)[C@@H](OC(C)=O)[C@H]1OC(C)=O
CC(C)(C)c1ccc(OCc2ccc(C(=O)NC3CCN(C4CCCCC4)C3)cc2)cc1
NCCCNCCCCCCCCNC(=O)C(Cc1ccc(O)cc1)NC(=O)c1cccnc1
CC(C(=O)NCCCN1CCOCC1)n1cccc1C(=O)c1ccccc1
C#CCOC(=O)C1C2C=CC(C2)C1C(=O)O
Cn1c(=O)c(=O)n(C)c2cc(N3CCOCC3)c(NS(=O)(=O)c3ccc(Cl)cc3)cc21
O=C(NCCNC(=O)c1cc2ccccc2[nH]1)C(=O)NCc1ccccc1Cl
CC(C)(C)c1ccc(CCC(=O)NCc2cc(F)c(NS(C)(=O)=O)c(C#N)c2)cc1
O=[N+]([O-])c1ccc(N2CCS(=O)CC2)nc1
COC(=O)[C@@H]1CN(C(=O)c2ccccc2)CCN1S(=O)(=O)c1c[nH]c2ncccc12
CN(C[C@H]1COCCO1)C(=O)c1nn(C)c2ccccc12
CC[C@@](O)(c1cn(Cc2ccc3c(-c4ccc(F)cc4)cc(C(N)=O)nc3c2)cn1)C(F)(F)F
NNC(=O)c1c(NN=C2C(=O)NNC2=O)sc2c1CCCCC2
CCNC(=O)[C@@H](CC)N(Cc1ccc(Cl)cc1)C(=O)CN(c1ccc(F)cc1)S(=O)(=O)c1ccc(C)cc1
CCc1ccccc1N1CCN(C(=O)Cc2ccccc2)[C@@H](C)C1=O
CCCOc1c(Cl)cc(C(=O)Nc2ccc(Br)cc2C(C)C)cc1OC
CC1(C)CCC[C@]2(C)C3=C(COC3=O)[C@H](O)C[C@@H]12
CCOC(=O)C[C@H]1C(=O)NCCN1Cc1cccc(C(F)(F)F)c1
CCc1c(C)sc2ncnc(C[C@H]3CC(=O)N(CCOC)C3)c12
CCCc1ccc(-c2oc(COc3ccc(OCC(=O)O)c(C)c3)nc2-c2ccc(OC)cc2)cc1
Cc1cc([N+](=O)[O-])cnc1Sc1nccn1C
Cc1ccc2nc(CN3CCN(S(=O)(=O)c4ccc(C(C)C)cc4)CC3)oc2c1
Cc1nnc(C2CCN(C(=O)CN3C(=O)CCC3=O)CC2)s1
CCCCC/C=C\C/C=C\C/C=C\C1(/C=C\CCCC(=O)O)CC1
Cc1nc([C@H]2CCCN(C(=O)c3ncoc3C(C)C)C2)sc1C
CN1CC2(CCC1=O)CCN(C(=O)[C@H]1CCOC1)CC2
CCOC(=O)C1=C(C)N(C)C(=O)NC1c1ccc(C)s1
CCOc1cc(/C=C2\N=C(c3ccc(OC)cc3)OC2=O)cc(Br)c1OCC(=O)OC
COc1ccccc1/C=C/c1ccccc1OCCCCN(C)C
COc1ccc(N(CC(=O)N(Cc2cccc(Cl)c2)[C@H](C)C(=O)NC2CCCCC2)S(=O)(=O)c2ccc(C)cc2)cc1Cl
C/C(=C\c1cc(F)c(OCC2CCC2)cc1F)C(=O)N[C@@H]1[C@H](O)[C@@H](O)[C@H]2OCO[C@H]2[C@@H]1O
CCCCOC(=O)N[C@H](C)c1nc2ccc(F)cc2s1
COC(=O)c1cc(NC(=O)CN(c2cccc(C(F)(F)F)c2)S(C)(=O)=O)ccc1Cl
COCCCN1C(=S)N[C@H](c2ccccn2)[C@@H]1c1cc(C)n(-c2cccc(C(=O)O)c2)c1C
COc1cc(C[C@@H](C)[C@@H](C)Cc2ccc(OCCN(C)C)c(OC)c2)ccc1O
Cc1ccc(-c2nc3ccccc3o2)cc1NC(=O)Cc1cccs1
O=C(CN1C(=O)[C@@](O)(c2cccc(F)c2)c2ccccc21)Nc1ccccc1C(F)(F)F
COC(=O)c1ccc(C(=O)NC(=S)Nc2ccc3nc(SC)sc3c2)cc1
O=C(NCCN1CCOCC1)C1CC(=O)N(c2ccc(F)c(Cl)c2)C1
COC(=O)[C@H](C)Oc1c(/C=N\n2c(C(C)(C)C)nc3ccc(Br)cc3c2=O)cc(Br)cc1OC
CC1CCCCN1CCCNC(=O)c1ccc(-c2cc(NC3CC3)n3ncc(/C=C4\NC(=O)NC4=O)c3n2)s1
Nc1nc(-c2ccccc2)nc2c1ncn2[C@@H]1O[C@H](COS(=O)(=O)NC(=O)c2ccccc2O)[C@@H](O)[C@H]1O
CSc1ccc(-c2cnc(N3CCC(C(N)=O)CC3)s2)cc1
COc1ccccc1NS(=O)(=O)c1ccc(O)c(C(=O)OCC(=O)c2ccc(Cl)cc2Cl)c1
CN1CCC(NC(=O)Nc2cc(C(F)(F)F)c[nH]c2=O)CC1
O=C(CSc1nc2ccc(N3CCCCC3)cc2c(=O)n1Cc1ccccc1)c1ccc(Cl)cc1
CCCCCCCCCCCCCCCCC(=O)COC1=C(O)C(=O)OC1C(O)CO
O=C1S/C(=C\Nc2ccc(Cl)cc2)c2ccccc21
O=C(NCCCCCCNCc1c[nH]c2ccccc12)c1cc(Cl)nc(Cl)c1
C/C(=C/c1ccc(C(=O)O)cc1)c1ccc2c(c1)C(C)(C)CCS2
O=[N+]([O-])/C=C1\NCCN1Cc1ccc(Cl)cn1
COCCn1cnnc1[C@H](C)NCc1ccc(-c2ccccc2)cc1
CCOC(=O)c1c(NC(=O)c2c(OC)cccc2OC)sc(C(=O)OC)c1C
COc1ccccc1NC(=O)CN1C(=O)N/C(=C/c2cc(Cl)c(OCc3ccc(Cl)c(Cl)c3)c(Cl)c2)C1=O
Cc1cc(C)cc(CSCC(=O)N(Cc2ccccc2)[C@@H](Cc2ccccc2)C(=O)NC2CCCCC2)c1
O=C(Nc1csc(-c2ccncc2)n1)Nc1cccc2c1C1CCCCN1C2=O
Cc1cc(CN2CCC(N3CCC(C(=O)NC4CC4)CC3)CC2)cc(C)c1O
O=C(COc1ccc(Cl)c2ccccc12)N1CC=C(c2ccc(O)cc2)CC1
CN(Cc1ccc(-n2cnn(Cc3ccc(Cl)cc3Cl)c2=O)cc1)CC(O)(Cn1cncn1)c1ccc(F)cc1F
O=C(O)/C(Cc1ccccc1[N+](=O)[O-])=N\Nc1nc2c(s1)CCc1cc(Cl)c(Cl)cc1-2
CSCc1nnc(SCC(=O)c2cccn2C)o1
CC(C)(C)OC(=O)NCCCC[C@H](NC(=O)[C@H](Cc1ccccc1)NC(=O)OCc1ccccc1)C(=O)CBr
CC[C@H](NC(=O)[C@@H](C)N(c1cc(OC)ccc1OC)S(C)(=O)=O)c1ccc(OC)c(C)c1
C[C@]12CC[C@H]3[C@H](CC[C@@]4(O)C[C@@H](O)CC[C@]34C#N)[C@]1(O)CC[C@H]2C1=CC(=O)OC1
CCC(=O)N1CCN(C(=O)c2sc3cc(Cl)ccc3c2Cl)CC1
CCOc1cc(C(=S)N2CCOCC2)ccc1OC
COc1ccc([C@@H]2C(c3ccccc3)=NO[C@@]23C(=O)N(C)c2ccccc23)cc1
O=C(c1ccco1)N1CCN(S(=O)(=O)c2ccc3nc(O)oc3c2)CC1
CC(C)C[C@H](C(N)=O)N(Cc1ccc(C(F)(F)F)cc1)S(=O)(=O)c1ccc(Cl)cc1
C[C@@H]1CC[C@H]2[C@H](C)[C@H]3CC[C@H]4C5[C@@H](O)CC6=CC(=O)CC[C@]6(C)[C@H]5C[C@H]4[C@@H]3C(=O)N2C1
CCN(C)C1(CNc2cnccn2)CCCCC1
CC(=O)O[C@@]1(C)CC[C@]2(O)C=CO[C@@H](O[C@@H]3O[C@H](CO)[C@@H](O)[C@H](O)[C@H]3O)[C@@H]21
Cc1cc(OCc2nnn(C)n2)c(C(C)C)cc1Cl
Cc1cc(C)cc(NC(=O)C2CCCN(S(=O)(=O)c3cccc4nsnc34)C2)c1
CCOc1ccc2nc(-n3nc(C)c4c3NC(=O)C[C@@H]4c3ccc(C(F)(F)F)cc3)sc2c1
COc1cc(C=Nn2c(O)nc3ccccc3c2=O)cc(OC)c1OCc1ccc(Br)cc1
N#Cc1ccc(N)c(C(N)=O)c1
COCC(=O)Nc1ccc(N2C(=S)N[C@H](c3ccccn3)[C@@H]2c2cc(C)n(Cc3cccnc3)c2C)cc1C
CC(C)(NC(=O)CC1CCCC1)c1nc2c(c(C(N)=O)n1)OCCO2
CCn1c(C)cn2c3c(=O)n(Cc4ccc(F)cc4)c(=O)n(C)c3nc12
Cc1ccc(CC(=O)Nc2cccc(-c3cn4c(C(=O)N(C)C)csc4n3)c2)cc1
COc1ccc([C@H](C)NS(=O)(=O)c2ccc(OC)c(C(=O)NC(C)C)c2)cc1
C=C(C)CSc1nc(N)c2c3c(sc2n1)CN(CCC)CC3
CC(C)(C)OC(=O)N1CCC[C@H](NCC2=CCCOC2)C1
CNC(=O)[C@H](CC(C)C)NC(=O)c1cccc(-c2cccc(C(F)(F)F)c2)n1
C=CCNC(=O)c1nc(COc2ccc(CC(N)=O)cc2)no1
Cc1nc2cc(C(=O)O[C@@H](C)C(=O)NCc3ccccc3)ccc2n1-c1ccccc1
CC1CCN(Cc2no[n+]([O-])c2-c2ccc(Cl)cc2)CC1
CCOC(=O)c1ccc(-c2c(-c3ccccc3OC)sc3cc4c(cc23)OCO4)cc1F
COc1ccc2c(c1)C1CNCC(C2)C1
O=C1c2ccccc2C(=O)C1c1ccc(O)cc1
CCCS(=O)(=O)c1nc(S(=O)(=O)c2ccc(C)cc2)c(N(C)Cc2ccccc2)s1
Cn1c(C(=O)NCCSC23CC4CC(CC(C4)C2)C3)cc(=O)n(C)c1=O
OC1(C(F)(F)F)c2ccccc2-c2ccc(OC3CCCCC3)cc21
CC[C@@]1(O)C(=O)OCc2c1cc1n(c2=O)Cc2cc3c(/C=C/C(N)=O)cccc3nc2-1
CSc1ncnc2c1c1sccc1n2[C@@H]1O[C@H](COP(=O)(O)O)[C@@H](O)[C@H]1O
NC1=N[C@](CF)(c2cc(NC(=O)c3ncc(Cl)cc3CF)ccc2Cl)[C@H]2C[C@H]2O1
COc1ccc(OCCCCn2c(-c3ccc(Cl)cc3)nc3ccccc3c2=O)cc1
COC(=O)c1c(N)n(-c2ccc(OC)c(Cl)c2)c2nc3ccccc3nc12
COc1ccc(CCN2C(=O)c3[nH]nc(-c4ccccc4O)c3C2c2cccc(Cl)c2)cc1
CCOC(=O)[C@@H]1CCCCN1CC(=O)N1N=C(c2ccccc2F)C[C@@H]1c1cc(OC)ccc1OC
COc1ccc(N2CCN(C(c3cccs3)C(C)NC(=O)c3ccco3)CC2)cc1
O=C(CC(O)C(=O)O)c1cccc(F)c1
CN(C)CCNC(=O)CN1C(=O)CS[C@@H](c2ccc(F)cc2F)c2c(-c3ccccc3)nn(-c3ccccc3Cl)c21
CCCN(CCCN(C)C)C(=O)NCCc1c[nH]c2cc(F)ccc12
CCCCOc1ccc(N2C(=O)NC(=O)/C(=C/c3ccccc3OCc3cccc4ccccc34)C2=O)cc1
Cc1ccc(S(=O)(=O)N(C)C)cc1NC(=O)[C@H](C)N(C)Cc1sccc1C
C[C@@H](C(=O)N1CCOCC1)N1CC[C@H](NS(=O)(=O)CCc2ccc(Cl)s2)C1=O
CC(=O)Nc1ccc(NC(=O)c2cc(F)ccc2F)cc1
COc1ccc(N/C(=N/C(=O)c2cc(C)cc(C)c2)NCCc2c(C)nn(C)c2C)cc1OC
Cc1ccc(O)c(NC(=O)COc2cc(C)ccc2C)c1
CCC1(CC)CCC2=C(O1)c1ccccc1C(=O)C2=O
Cc1ccc(S(=O)(=O)c2ccc(Cl)cc2)cc1S(=O)(=O)Nc1ccc(F)cc1
CN(Cc1cccc2cnccc12)C(=O)c1cc(COc2ccc(F)cc2F)on1
COc1ccc(CNC(=O)c2c(N)oc3ccc(Br)cc3c2=O)cc1
O=[N+]([O-])c1cc(C(F)(F)F)cc([N+](=O)[O-])c1Nc1ccccc1
COc1cccc(CN2CCC(NCc3c[nH]nc3C)CC2)c1
CC(=O)Nc1ccc(OC(=O)/C=C/c2c(Cl)nc3ccccn23)cc1
CCCCOOC1(OOCCCC)CCCCCCCCCCC1
Cc1cccc(C)c1NC(=O)C(c1ccccc1)N1CCC(c2ccccc2)CC1
C[C@H]1CN(CCn2c(=O)oc3ccccc32)[C@H](C)CO1
Cc1ccc(C2=NN(C(=O)CBr)C(c3cc(Cl)ccc3O)C2)cc1
C1CN(C[C@H]2O[C@@H]2C23CC4CC(CC(C4)C2)C3)CCO1
CCCn1c(N)c(C(=O)CSc2nnc(-c3ccco3)n2Cc2ccccc2)c(=O)[nH]c1=O
O=C1C(Cl)=C(Nc2ccc(C(F)(F)F)cc2)C(=O)c2[nH]c(-c3ccccn3)nc21
Cc1nnc(SCCCn2ccnc2-c2cc3n(n2)CCCNC3)s1
Cc1nc(S)n(CC2CCCO2)c1C
CC(C)NC(=O)[C@@H](Cc1ccccc1)N(Cc1ccccc1F)C(=O)CCSCc1ccccc1
O=S(=O)(c1cccc2ccccc12)N1[C@H]2CC[C@H]1CC(n1cncn1)C2
COc1cc(C#N)ccc1OC(=O)C1CCN(C(=O)c2ccc(F)cc2)CC1
C=C(CCC1=C(C)CCCC1(C)C)C(O)CC/C(C)=C/CCC1=CC(=O)OC1O
COC(=O)[C@@H](C(C)C)N1c2ccccc2[C@H](C)CC1(C)C
Cc1noc(C)c1COc1cccc(-c2nnco2)c1
CN(C)C(=O)c1cccc(NC[C@@H]2CCCN3CCCC[C@H]23)n1
C=COC(=O)c1sc2nc(C)cc(C)c2c1N
CC(C)CC(=O)O/N=C1\C(=O)N(Cc2cccc(C(F)(F)F)c2)c2ccc(Cl)cc21
Cc1nnc(NC(=O)C2C3C=CC(O3)C2C(=O)O)s1
COCCN1CC(c2c[nH]c3cc(-n4ccc(OCc5ccccc5)cc4=O)ccc23)C1
COC(=O)c1ccc(NC(=O)Cc2c(C)c3c(OC)cc(C)cc3oc2=O)cc1
CC1(C)CCC(C)(C)c2cc(C3(C)OC3c3ccc(C(=O)O)cc3)ccc21
Nc1ncnc2c1ncn2[C@@H]1O[C@H](CNS(=O)(=O)NC(=O)c2ccccc2O)[C@@H](O)[C@H]1F
CN1CCc2cc3c(cc2[C@@H]1Cc1ccc2c(c1C(=O)O)OCO2)OCO3
CCOc1ccc(-c2ccc([C@@H]3[C@@H](c4ccccn4)NC(=S)N3CCCN(C)C)o2)cc1
CC(=O)N(Cc1ccccc1C(F)(F)F)CC(Cc1c[nH]c2ccccc12)NC(=O)CN1CCN(c2ccccc2)CC1
CCN(CC)CCN1C(=O)C(O)=C(C(=O)c2ccc(OC)cc2)[C@@H]1c1ccco1
C[C@H](NC(=O)Nc1cc(Cc2n[nH]c(=O)c3c2CCCC3)ccc1F)C(=O)O
Cn1cc([C@@H]2CSCCN2S(=O)(=O)c2ccccc2F)cn1
c1cc(-c2c[nH]c([C@@H]3COCCN3Cc3csnn3)n2)ccn1
CCOC(=O)C1CCN([C@@H](c2cc3cccc(C)c3[nH]c2=O)c2nnnn2Cc2ccccc2)CC1
Cc1ccc([C@]2(c3ccccc3)NC(=O)N(CN3CCN(C/C=C\c4ccccc4)CC3)C2=O)cc1C
COC(=O)c1ccc(F)c(S(=O)(=O)Nc2ccc(F)c(Cl)c2)c1
Cn1c(CCN2CCN(c3ccccn3)CC2)nc2cc(NC(=O)COc3ccccc3)ccc21
CC(CNS(=O)(=O)C(C)C)c1ccc(Br)cc1
Cn1c(=O)/c(=C/N=c2n(C)c3ccccc3n2C)s/c1=C\c1sc2ccc(F)cc2[n+]1C
CC(OC(=O)c1cccc([N+](=O)[O-])c1)C(=O)NCc1ccc2c(c1)OCO2
CCc1nn(Cc2ccc(-c3nc4cc(C(C)(C)C)ccc4[nH]3)cc2F)c(CC)c1CC(=O)O
CCc1cnc([C@@H](C)N[C@H](C)c2ccc(N3CCOC3=O)cc2)s1
CC[C@@H](NC(=O)c1ccccc1-n1cnnc1)[C@H]1C[C@H](O)C1
Fc1ccc(C(Cn2cncn2)OCc2ccc(Cl)c(Cl)c2)c(F)c1
CCCn1nc(C(=O)NNC(=O)c2ccc(C)c(C)c2)c2ccccc2c1=O
O=C1c2c(c3n(c(=O)c2O)C2(CCC4CC42)N(CCN2CCCS2(=O)=O)C3=O)CCN1Cc1ccc(F)c(Cl)c1
CC(C)CNC(=O)c1c(-c2ccc(COC(=O)c3ccc([N+](=O)[O-])c(O)c3)cc2)oc2ccccc12
O=C1CN(Cc2c(-c3ccc(Cl)cc3)nc3ccc(-c4ncon4)cn23)CCN1
O=c1[nH]cnc2c1ncn2CCCCO
CC(C)[C@@H](NS(=O)(=O)c1ccc(-c2ccc(OCc3cccc(O)c3)cc2)cc1)C(=O)O
CC[C@H]1OC(=O)[C@H](C)C(=O)[C@H](C)[C@@H](O[C@@H]2O[C@H](C)C[C@H](N(C)C)[C@H]2O)[C@](C)(OCC(O)CNCCc2cccnc2)C[C@@H](C)NC(=O)[C@H](C)[C@H](O)[C@@]1(C)O
N#CC1(C#N)[C@@H](c2cccnc2)O[C@@]23CCCCC[C@@H]2[C@@]1(C#N)C(=N)O3
CCCCNc1nc(N)nc2c1CN(Cc1ccc(OC(F)(F)F)cc1)CC2
COc1cc2oc(=O)ccc2c(OC)c1C[C@@H](O)C(C)(C)O
CO[C@@H]1[C@@H](C)[C@@H](NC(=O)NCCNC(=O)c2cccnc2)C1(C)C
COc1ccc(O)c(C(=O)OCC(=O)Nc2ccc(OC(F)F)c(Cl)c2)c1
Cc1ccc2[nH]c([C@@H]3CCCN(C(=O)c4ccnc(C)c4)C3)nc2c1
CCCCCCCCCCOc1ccc(C(=O)Oc2ccc(OCCCCCCC)cc2)cc1
CCOc1cc([C@@H]2NC(=O)N[C@@](O)(C(F)(F)F)[C@@H]2C(=O)c2ccccc2)ccc1OC
CC(=O)OCC(CCn1cnc2c(O)nc(N)nc21)COC(=O)[C@@H](N)C(C)C
Cc1nc2cc(NC(=O)c3ccccc3SCc3ccsc3)ccc2o1
CS(=O)(=O)c1ccc(-c2nc(C3CC3)cs2)cc1
Cc1c(C)n(Cc2ccccc2)c2ccc(C(=O)N3CCN(c4ccccc4)CC3)cc12
O=C(O)c1ccccc1N1C(=O)[C@H]2[C@@H]3C[C@@H]([C@H](O)[C@H]3O)[C@@H]2C1=O
NS(=O)(=O)c1ccc(OCCN2CCOCC2)cc1
CC1(C)OC[C@@H]([C@H](C=O)OCc2ccccc2)O1
CNC(=O)c1ccc(OC)c(COc2ccccc2OC)c1
COc1cc(CC(=O)NCC(COC(=O)C(C)(C)C)Cc2ccc(C(C)(C)C)cc2)cc(Cl)c1N
CCOc1ccc(NC(=O)C[C@@H]2C(=O)N(c3ccccc3)C(=O)N2Cc2cccnc2)cc1
O=C(CN[C@@H](c1ccccc1)c1ccc(F)cc1)N1CCNC1=O
COc1cc([C@@H]2SCC(=O)N2c2ccc(Cl)cc2)cc(Br)c1OC
CCOC[C@@H]1CCS(=O)(=O)C12CN(S(=O)(=O)c1ccc(C)cc1)C2
COC(=O)c1ccc(Cl)c(Cc2noc(C(=O)NCc3cccnc3)n2)c1
N#Cc1c2n(c(=O)n(CC(=O)Nc3ccccc3SC(F)F)c1=O)CCC2
CNCC(=O)N1CCCC(c2ccnc(Nc3cnccn3)n2)C1
COc1ccc(OC)c2[nH]c(C(=O)N3CCC[C@@H](c4nnc5ccccn45)C3)cc12
COc1ccccc1/C=C1\SC(=S)N(Nc2nc3ccccc3s2)C1=O
OC[C@@H]1O[C@H](Sc2ncnc3[nH]cnc23)[C@H](O)[C@H](O)[C@@H]1O
COCCN(C(=O)c1ccccn1)c1nc2c(s1)CCc1c-2cnn1C
O[C@H](c1cccnc1Cl)C(F)(F)F
C=C[C@]1(C)C[C@@H](OC(=O)CSc2nc(O)cc(NC(=O)[C@@H]3CCCCN3)n2)[C@]2(C)[C@H](C)CC[C@]3(CCC(=O)[C@H]32)[C@@H](C)[C@@H]1O
CC(C)[C@H](NS(=O)(=O)c1ccc2sc3cc(NS(C)(=O)=O)ccc3c2c1)C(=O)O
CC(C)[C@@H]1CC[C@@H](C)C[C@H]1OC(=O)N(CCCCCCc1cn(CCCCCCCc2c[nH]c(N)n2)nn1)CCc1ccccn1
Cc1ccccc1CN(C)C(=O)c1sc(S(N)(=O)=O)cc1C
N#C[C@H]1[C@@H](CO)O[C@@H](n2ccc(=O)[nH]c2=O)[C@@H]1O
Cc1ccc(OCC(=O)Nc2cccc(S(=O)(=O)N3CCCC3)c2)cc1C
COCCN(C(=O)COC(=O)c1cc2ccccc2cc1OC)c1c(N)n(Cc2ccccc2)c(=O)[nH]c1=O
N#Cc1ccc(C2NC(=O)N(c3ccnc(C(F)(F)F)c3)C3=C2C(=O)CC3)cc1
Cc1cc(C(=O)OCC(=O)c2c(-c3ccccc3)[nH]c3ccccc23)c(C)o1
Cc1ccc(-c2nn(C)cc2CCC(=O)NCc2ccccc2Cl)cc1
CSCCN1C(=O)Cc2ccccc2C1=O
COC(=O)CCCNC(=O)Nc1cc(OC)c(Cl)cc1OC
N=C(N)NCCC[C@@H]1NC(=O)[C@@H]2C[C@@H](CN2)NC(=O)[C@H](CC(=O)O)NC(=O)CNC1=O
O=C(Nc1cc(Cl)ccc1F)c1ccc(CN2C(=O)CCC2=O)cc1
Cc1cc(N2CC[C@@](O)(CNC(=O)CN3CCC(C)CC3)C2)ncn1
COCCCN1Cc2ccccc2C1=N
CCCCCCCCOC(=S)SC(Cn1ccnc1)c1ccc(Cl)cc1Cl
CN(C)CCOc1cccc(CN2CCC3(CC2)NC(=O)C[C@H]3C(=O)O)c1
CCN(CC)CCCC(C)Nc1ccnc2cc(Cl)ccc12
O=C(O)Cn1cc(Sc2ccc(Cl)cc2)c2cc(Cl)ccc21
NC(=O)C12CC3CC(C1)C(NC(=O)C1(CNC(=O)N4CCc5ccccc5C4)CC1)C(C3)C2
CN1CCC(c2c[nH]c3ccc(NC(=O)CCCCCCCCCCCCC(=O)Nc4ccc5[nH]cc(C6CCN(C)CC6)c5c4)cc23)CC1
O=C(Nc1ccc(OCc2ccccc2)cc1)[C@@H]1CCCN1
CCNC(=O)Nc1ccc(-c2cccc(C(=O)O)c2)cn1
CCCOC(=O)c1cc2c([nH]c3ccccc32)c(-c2ccc3c(n2)C(=O)C(NC(C)=O)=CC3=O)n1
CCN1CC(C)(C)Oc2nc(N3CC4CCC(C3)O4)nc(-c3ccc(NC(=O)Nc4ccc(C)cn4)cc3)c2C1=O
CNC(=O)c1c(NC(=O)c2cccc(Oc3ccccc3)c2)sc2c1CCC2
[3H]C([3H])([3H])Oc1cncc(C#Cc2ccccn2)c1
COc1ccc(C)cc1CN1CCN(CN2C(=O)N[C@]3(C2=O)[C@@H](C)CCC[C@H]3C)CC1
CCOc1nccc(N2CC[C@@H](Oc3ccc([C@H](C)NC(C)=O)cc3)C2)c1OC
COC(=O)c1cc(NC(=O)c2ccc(OC)c(COc3ccc(OC)cc3)c2)cc(C(=O)OC)c1
CC1=C(C(=O)Nc2ccccc2C(F)(F)F)[C@@H](c2ccc(F)cc2)C2=C(C[C@H](c3ccccc3)CC2=O)N1
COCc1cc(C)nc2sc(C#N)c(N)c12
O=C1/C(=C/c2ccc(O)cc2)CCCc2ccccc21
c1cnc(N2CCOC3(COCCN(Cc4cc[nH]n4)C3)C2)nc1
COC(=O)c1cccc(-n2c(C)cc([C@H]3[C@@H](c4ccccn4)NC(=S)N3c3ccc(Sc4ccc([N+](=O)[O-])cc4)cc3)c2C)c1
CCOc1ccc(C(=O)Oc2ccc3ccccc3c2/C=N/NS(=O)(=O)c2ccc(C)cc2)cc1
Cc1ccc(NC(=O)CSc2nnc(-c3sc4ncccc4c3N)n2C2CC2)c(C)c1
CC(C)CNC(=O)N1CCC[C@@H](C(=O)Nc2nc(C(C)C)cs2)C1
COc1cc(OCCCN2CCOCC2)c(/C=C/C(=O)c2ccc(C(=O)O)cc2)cc1-c1cccs1
COc1ccc(CSc2nc3ccccc3c(=O)[nH]2)cn1
C/C(CC(=O)c1ccccc1)=N/CCC/N=C(\C)CC(=O)c1ccccc1
O=C(O)CCC(=O)N(C1CC1)[C@H]1c2ccccc2N(C(=O)c2ccc(F)cc2)[C@H]2CC[C@H]21
Cc1cc(C)n(-c2ncncn2)n1
CC[C@@H]1SC2=NC(C)=C(C(=O)OC(C)C)[C@@H](c3ccc(C)cc3)N2C1=O
Cc1noc(C)c1CNC(=O)C(C)Oc1ccccc1F
O=C([C@H]1CN(Cc2ccccc2)C[C@@H]1c1ccc(Cl)cc1)N1CCN(C2(CNCc3ccncc3)CCCCC2)CC1
Cc1oc(-c2ccccc2)nc1C(=O)N1c2ccccc2C[C@H]1C
COc1ccc([C@@H]2OCC[C@H]2NC(=O)Nc2cccc(-n3ccnn3)c2)cn1
CCOc1cc(/C=C2/C(=O)NC(=S)N(c3ccccc3)C2=O)cc(Cl)c1Cc1cccc(F)c1
CCOc1cccc(N(C(=O)c2ccco2)C(C(=O)NC2CCCC2)c2cccnc2)c1
OCc1cccc(CNc2cc(N3CCCCC3)ncn2)c1
O=C(Nc1ccc(CCNC[C@H](O)c2cccnc2)cc1)c1ccccc1N1CCCC1
CS(=O)(=O)Nc1ccc(-c2ccncc2)c2cccnc12
COc1cccc(CN(C(=O)CN(c2cccc(OC)c2)S(C)(=O)=O)[C@H](C)C(=O)NC(C)C)c1
COc1cccc(/C=N/c2cccc(F)c2)c1OCc1ccc(C(=O)O)cc1
N=C(N)c1ccc2oc(-c3cccc(OCCCCOc4ccccc4)c3)cc2c1
O=C(NC12C3CCC4C3C3C(CCC31)C42)C1CCCCC1
COc1ccc(/C=C2\C=C[C@@H]3CC[C@@H]4[C@@H]5CCC[C@]5(C)CC[C@H]4[C@]3(C)C2)cc1
O=C(Cn1cnc2cc([N+](=O)[O-])ccc2c1=O)N1CCCCCC1
Cn1ccnc1[C@H](NCc1ccc(F)cc1F)c1ccc(F)cc1
COc1cc(Br)c(CN[C@H]2CCCN(c3nccn(C)c3=O)C2)cc1O
O=C(NCc1ccc(-c2cccs2)o1)c1ccccc1Cl
COc1ccc(-c2nnc(SCc3ccccc3F)n2-c2ccc(Cl)c(Cl)c2)cc1
CCCCCCCCCCn1cc(Cn2c(C)nc3nc(-c4ccccc4)cc(C(F)(F)F)c3c2=O)nn1
N[C@@H]1CCCN(c2nc(-c3n[nH]c4cnc(-c5cccnc5)cc34)ccc2Br)CC1
CC[C@@H](C)C(=O)N1CCN(c2ccnc(-c3ccccc3)n2)CC1
CC(C)C[C@H](NC(=O)[C@H](CC(C)C)NC(=O)CN(C(=O)OCc1ccccc1)P(=O)(O)O)C(=O)O
COc1ccc(-[n+]2noc([O-])c2CNc2ccc(F)cc2)cc1
CC1CCN(c2nc(C(F)(F)F)ccc2CNC(=O)C(C)c2ccc(NS(=O)(=O)N(C)C)c(F)c2)CC1
O=C1C(=O)N(CCN2CCOCC2)[C@H](c2ccncc2)/C1=C(\O)c1ccccc1
C=C[C@@]1(C)CCC2=C(C(=O)[C@@]3(OC(C)=O)OC(=O)[C@@]24CCCC(C)(C)[C@H]34)C1OC(C)=O
C[C@H](CO)NCc1ccc2oc3cc(Cl)ccc3c(=O)c2c1
Cc1ccc(C(=O)NC2CC2)cc1-c1ccc2c(c1)NC(=O)C21CCC(N2CCOCC2)CC1
COc1ccccc1NC(=S)NN=Cc1ccccc1
O=C(CO[C@@H]1CC[C@H]2[C@H]1OCCN2Cc1cccs1)N1CCCC1
Cc1noc(-c2ccc3c(c2)c2c(n3CCCc3nc4cc(F)ccc4[nH]3)CCCC2)n1
CC(C)CN(C(=O)COC(=O)CCC(=O)c1ccc(Cl)cc1)c1c(N)n(Cc2ccccc2)c(=O)[nH]c1=O
CCOc1ccc(S(=O)(=O)N2CCCC(C(=O)NCc3cccnc3)C2)cc1C
O=C1[C@@H]2[C@H]3C=C[C@@H]([C@H]2C(=O)N1COP(=O)(O)O)[C@@H]1[C@H]3[C@H]2C(=O)N(COP(=O)(O)O)C(=O)[C@@H]21
O=C(NC1CCCCC1)Nn1c(-c2ccccc2)nc2ccccc2c1=O
CC[C@@H](C(=O)NCC(C)C)N(CCc1ccccc1)C(=O)Cc1ccc(Cl)c(Cl)c1
COc1ccc(Cl)cc1C(=O)NCCC1CCN(S(=O)(=O)NC(=O)NN2CCCCCC2)CC1
N/C(=N/Cc1ccco1)c1cnccn1
COc1ccc(C(=O)Nc2ncc(-c3ccc(C(=O)O)cc3OCc3ccccc3C#N)s2)cc1
CS(=O)(=O)N(CCCC(=O)Nc1cccc([N+](=O)[O-])c1)c1cccc(C(F)(F)F)c1
Cc1ccc(O)c([C@@H]2COC[C@H]3O[C@@]32C)c1
C[C@H]1CC[C@@H]2[C@@H](OC(=O)[C@]23CC(c2ccccc2F)N(c2ccccc2)O3)[C@]2(C)C(=O)C=C[C@@]12O
COc1ccc(C(=O)NC(=O)COc2ccc(Br)cc2F)cc1
CCCOc1ccccc1-n1c(C)c(C)n2c3c(=O)n(CCC)c(=O)n(C)c3nc12
COc1cc2c(cc1OCCCN1CCCCC1)C(=O)/C(=C/c1ccc(N(C)C)cc1)C2
Cc1ccc(C(=O)[C@H](C)OC(=O)[C@@H](C)N2C(=O)[C@H]3[C@@H]4C=C[C@H]([C@H]5C[C@H]45)[C@H]3C2=O)cc1
CCn1c(C)c(C(C)=O)c(N2CCCCC2)nc1=S
CCC(CC[C@@H](/C=C/[C@H]1[C@H](OC(C)=O)C[C@H](OC(C)=O)[C@@H]1C/C=C\CCCC(=O)OC)OC(=O)[C@](OC)(c1ccccc1)C(F)(F)F)OC(C)=O
O=c1c2cc(Cl)c(Cl)cc2c(-c2ccc(F)cc2)nn1-c1ccc(OC(F)(F)F)cc1
COc1cccc(CN(C(=O)CCCSc2ccc(Cl)cc2)[C@@H](C)C(=O)NC2CCCCC2)c1
N=C1/C(=C/c2ccc(O)cc2)C(=O)N=C2SC(N3CCCC3)=NN12
COc1ccc(-c2c3c4cc(OC)c(OCCNC(=N)N)cc4oc(=O)c3n3ccc4cc(O)c(OC)cc4c23)cc1O
O=C(N[C@@H](Cc1ccc(O)cc1)C(=O)NCc1ccccn1)c1ccc2c(c1)nc(-c1ccoc1)n2C1CCCCC1
COc1ccc(NC(=O)N(Cc2ccc(C)cc2)Cc2cc3cc(OC)c(OC)cc3[nH]c2=O)cc1
CCc1nnc(NC(=O)CN2CCN(CC)CC2)s1
O=C(NCC1CCN(C[C@@H](O)c2ccccc2)CC1)c1cnns1
CCOC(=O)c1c(Nc2ccc(Cl)cc2)oc(/C=N/Nc2ccc3ccccc3n2)c1Cl
CN(Cc1nccn1Cc1ccccc1)C(=O)c1cccc2ccnn12
Cc1ccc(NS(=O)(=O)c2cccc3cccnc23)cc1Cl
CCCCC#Cc1ccc(C=O)cc1
O=C(N[C@H]1CCOC1)c1cccc(-c2ccc(CN3CCCCC3)cc2)c1
O=C(/C=C/c1cc2c(cc1[N+](=O)[O-])OCO2)Nc1ccc(N2CCOCC2)cc1
CNC(=O)[C@@H](Cc1ccccc1)N(Cc1ccc(F)cc1)C(=O)CCCN(c1cccc(Cl)c1C)S(C)(=O)=O
N=C(Nc1cccc(CN)c1)c1ccccn1
CCOc1ccccc1NC(=O)COc1cc(C)c(C)cc1C
O=C(CSc1nncn1-c1ccccc1)c1c[nH]c2ncccc12
O=C(Cn1cccc1)NCC1(COc2ccccc2)CC1
CCCCCCCC(=O)N[C@@H](NC(=S)N[C@@H]1CCS(=O)(=O)C1)C(Cl)(Cl)Cl
CCn1c(SCC(=O)N2CCC[C@H]2c2cc(OC)ccc2OC)nnc1C1CC1
COC(=O)c1ccc([C@H]2N(Cc3ccccc3)c3ccc(S(=O)(=O)Nc4ccc(C)cc4)cc3C(=O)N2c2ccc(OC)cc2)cc1
CCCCCCC(=O)NC1CCOC1=O
CCOC(=O)C1C(=O)CC(C)(O)C(C(=O)OCC)C1c1ccc(O)c(OC)c1
C[C@@H](NC(=O)c1ccc(Cl)c(Cl)c1)c1nnc(SCC(=O)Nc2ccc(Cl)c(Cl)c2)n1C
CCN(c1ccccc1)c1nnc(NC(=O)Nc2cccc(C(F)(F)F)c2)s1
CCC(=O)N(Cc1ccccc1)Cc1cc(-c2ccc(C)cc2C)on1
CCCCCC[C@H](C(=O)N1C[C@@H](Oc2ccc(OC)cc2)C[C@H]1C(=O)O)n1cnc(NC(=O)c2ccccc2S(=O)(=O)O)c1
CC1(C)N=C(N)N=C(N)C1c1ccc(Cl)cc1
CCC(C)(C)CC(C)=O
CNCc1c(O[C@H](C)C(=O)O)ccc2ccccc12
CCCCCCNC(=O)c1cc(Cl)ccc1O
CCc1ccc(C(=O)Nc2cc(NC(=O)c3ccc4c(c3)OCO4)ccc2F)cc1
CSc1ncc(S(=O)(=O)Cc2ccco2)c(N)n1
O=C(N[C@@H](Cc1ccc(OCCCCCN2CCNCC2)cc1)C(=O)O)OCc1ccccc1
Cc1c(CCC(=O)NC(Cc2ccccc2)C(=O)O)c(=O)oc2c(C)c3occ(C(C)(C)C)c3cc12
CC1=C(C(=O)OCc2ccccc2)[C@H](c2ccc3ccccc3c2)NC(=O)N1C
CCOC(=O)c1nc2ccccc2nc1Oc1ccc(C#N)cc1
CC(=O)c1ccc(-c2ccc3nc(-c4ccc(Cl)cc4)c(CN4CCN(C(=O)c5ccc(C)cc5)CC4)n3c2)cc1
O=C(N/N=C/c1ccc(OC(=O)c2ccccc2)cc1)c1ccc(CN2CCOCC2)cc1
CC1(C)CC(=O)C2=C(C1)NC(=O)CC2c1ccc(C(C)(C)C)cc1
CC(C)Cn1ncnc1CN(C)[C@@H]1CCCN(c2ccccc2)C1=O
CCCCNCC1=C(C)C(=O)[C@]2(O1)C(=O)N[C@@](OC)(C(=O)c1ccccc1)[C@@H]2O
O=C(O)[C@H]1Cc2ccccc2CN1C(=O)C[C@@H](O)c1cccc(F)c1
Clc1ccc(OCc2nc(-c3ccc(Br)o3)no2)cc1
COc1ccc(-c2ocnc2-c2cc(N)c(OC)c(OC)c2)cc1N
COc1ccc(/C=C2/N=C(c3ccc(C)c([N+](=O)[O-])c3)OC2=O)cc1Br
CC1(C)C=Cc2cc(-c3coc4cc(O)ccc4c3=O)cc(O)c2O1
O=c1cc(-c2ccc(Cc3ccc(CO)cc3)cc2)[nH]c2ccccc12
Cc1ccc(Sc2ccc(/C=C/C(=O)O)cc2[N+](=O)[O-])cc1
Cc1ccc(S(=O)(=O)Nc2ccc(N3CCOCC3)cn2)cc1
N#Cc1ccc(CC(=O)c2cc3n(n2)CCCC3)nc1
Cc1ccc2c(cnn2C(=O)CCC(=O)N2CCCCC2C)c1
COC(=O)CNC(=O)CSc1nnc2sc3ccccc3n12
CC(C)[C@]12C[C@@H](OC(=O)C(=O)c3ccccc3)C[C@H]1C2
CN(C)CCCCN(C)S(=O)(=O)CC1CCCCC1
C=C(C)[C@@H]1CC[C@]2(COC(=O)CCC(=O)O)CC[C@]3(C)[C@H](CC[C@@H]4[C@@]5(C)CC[C@H](OC(C)=O)C(C)(C)[C@@H]5CC[C@]43C)[C@@H]12
CCC(CC)NC(=O)c1cc(-n2c(C)ccc2C)ccc1Cl
COc1ccccc1NS(=O)(=O)c1cc(C(=O)N2CCCCC2)cs1
CONC(=O)c1cc2ccc(C(C)(C)C)cc2[nH]1
O=S(=O)(CCCOc1ccc2[nH]c3nc(O)nc-3cc2c1)N1CCN(Cc2ccccc2)CC1
C[C@@H](Oc1ccc2c(c1)OCO2)C(=O)N1CCN(c2ccc(-n3cncn3)nn2)CC1
CCOc1ccc(N2C(=O)[C@@H]3[C@H]4CC[C@@H](C4)[C@H]3C2=O)cc1
CNc1nc(Nc2cc(F)c(-c3cnn(C)c3C(=O)N(C)C)cc2OC)ncc1C(F)(F)F
Cn1cc(C(=O)O)c(=O)c2cc(Cc3ccccc3)ccc21
CC1(N)CN(c2cc3c(cc2F)c(=O)c(C(=O)O)cn3CCF)C1
C[C@@]1(C(=O)Nc2ccc[nH]c2=O)CC1(Cl)Cl
CO[C@@H]1[C@H](OC)COC[C@H]1N(C)C(=O)/C=C/c1cccc(F)c1
N#Cc1ccc(N/C(=N\c2ccc(-c3ccccc3)cc2)NCCc2c[nH]c3ccccc23)c(O)c1
CCC(C)NS(=O)(=O)c1ccccc1Nc1nc(Nc2ccc(N3CCOCC3)cc2OC)nc2c1CCN2
Cc1cc(NCc2ccccc2-n2ccnc2C)n2nc(C)cc2n1
C=C[C@@]1(C)CC(=O)[C@@]23OC(=O)O[C@H]4CCC(C)(C)[C@H](C5OC(=O)OC5[C@H]2O1)C43C
O=C(Cn1c(=O)cnc2ccccc21)NCc1cccc(C(F)(F)F)c1
Cc1cc(-c2ccccc2)cc(C)[n+]1CC(=O)Nc1ccccc1S(N)(=O)=O
Cc1ccc(CCCN2CCC(COC(c3ccccc3)c3ccccc3)CC2)cc1
Cc1nn(C)cc1S(=O)(=O)Nc1ccc(C(F)(F)F)cc1
COc1cc([C@@H]2c3c(cc(C)oc3=O)O[C@@H]2C(=O)Nc2ccc3c(c2)OCO3)cc(OC)c1OC
CCOC(=O)c1ccc(C)c(NC(=S)NCCSCc2ccc(Cl)cc2Cl)c1
N[C@@H](CSC(Cc1ccccc1)(c1ccc(Cl)cc1)c1cccc(Cl)c1)C(=O)O
CCCCCCCCCCN1C(=O)[C@@H]2[C@H]3CC[C@H](O3)[C@@H]2C1=O
O=C(CCc1cn(Cc2ccccc2Cl)c2ccccc12)NCc1cccnc1
Cc1ccc(Oc2ccc(N3C(=O)[C@H]4C5c6ccccc6C(c6ccccc65)[C@@]4(C)C3=O)cc2)cc1
COc1cccc(-n2nc(C(=O)Nc3cccc(C(F)(F)F)c3)c3ccccc3c2=O)c1
COC(=O)C1(C)[C@@H]2C3C4[C@H]1[C@H]1CCC[C@@H]1[C@H]4[C@@](C)(C(=O)OC)[C@H]3[C@H]1CCC[C@@H]12
CCOc1cc(/C=C\C(=O)c2ccc(OC)c3ccccc23)ccc1O[C@@H](C)C(=O)N(C)C
O=C(c1ccccc1)c1ccc(C(=O)N2CCN(c3ccc(O)cc3)CC2)cc1
CCN(C(=O)CN(CC(=O)NCCN1CCCC1)c1cc(Cl)ccc1Oc1ccc(Cl)cc1)C1Cc2ccccc2C1
Cc1ccc(S(C)(=O)=O)cc1F
Cc1c(N(CCC(F)(F)F)S(=O)(=O)c2ccccc2)sc2ccccc12
O=c1c2c(-c3cccc([N+](=O)[O-])c3)csc2ncn1Cc1cccc(Cl)c1
Cc1nnc(COC(=O)c2ccc(S(=O)(=O)N3CCOCC3)cc2)o1
COc1cc(C=Nn2c(O)nc3ccccc3c2=O)c(Br)c(Cl)c1OCc1cccc(F)c1
CC(C)C[C@H](NC(=O)COc1cccc2ccccc12)C(=O)N[C@H](C=O)CC(=O)O
CCOc1ccc(/C=N/Nc2cc(=O)n(C)c(=O)n2C)cc1
COc1cc(OC)cc(C(=O)Nc2ccc(OC)cc2OC)c1
C1CCC([C@H]2CCCCN2)CC1
CCOC(=O)[C@@H](CO)NC(=O)CCn1nnc2ccccc2c1=O
C=C(C)[C@@H]1CC[C@@]2(C)CC[C@]3(C)[C@H](CC[C@@H]4[C@]3(C)CC[C@@H]3C(C)(C)C(=O)CC[C@@]34C)[C@@H]12
O=C1CC(c2ccco2)Cc2nc(N3CCc4ccccc4C3)ncc21
O=S(=O)(c1ccccc1)N1CCCCN(S(=O)(=O)c2ccccc2)C1
C/C=C/CC1Oc2cccc(OC)c2-c2ccc3c(c21)C(C)=CC(C)(C)N3
O=C1NN=C(c2ccc(Br)cc2)C[C@@H]1c1c[nH]c2ccccc12
COc1ccccc1N1CCN(c2ncnc3[nH]nc(Br)c23)CC1
COc1cc(OC)c(CCCc2ccccc2F)c(OC)c1
CCNC(=O)[C@@H](CC)N(CCc1ccccc1)C(=O)CSCc1ccccc1Cl
CC(C)N(CCC(CCN(C(C)C)C(C)C)(C(N)=O)c1ccc(F)cc1F)C(C)C
Cc1nn(C)c2nc(N3CCC[C@@]4(CCCN(C)C4)C3)sc12
CCCC(=O)CC(=O)CC
COc1ccc(S(=O)(=O)N2C(=O)CCC2C(=O)NN)cc1
CC(C)COP(=O)(OCC(C)C)C(N=C=S)c1ccccc1
CCCn1nnnc1NCc1ccc(OCc2cccs2)cc1
CCOc1cc(/C=N/c2cccc(C)c2C)cc(Br)c1OCC
CCCCNC(=O)[C@H](Cc1ccccc1)N(Cc1ccc(C)cc1)C(=O)CN(c1ccc(F)c(Cl)c1)S(C)(=O)=O
CN(CCCN1C(=O)[C@H]2[C@H](C(=O)Nc3cc(Cl)cc(Cl)c3)[C@H]3C=C[C@@]2(O3)[C@@H]1C(=O)NC1CCCCC1)Cc1ccccc1
Cc1oc2ccc(N/C(=N\C#N)N[C@H]3CCCCN(CC(=O)N4CCCC4)C3=O)cc2c1C
Cc1ccc(S(=O)(=O)N(CC(=O)NCCOc2ccc3ccccc3c2)c2ccccc2)cc1
Cc1cc(C)cc(CSCC(=O)N(Cc2ccc(Br)cc2)[C@@H](Cc2ccccc2)C(=O)NC(C)(C)C)c1
CCOC(=O)C1=C(C)NC(SC)=NC1c1cccc([N+](=O)[O-])c1
O=C(NCCCc1ccc(F)cc1)C1CCN(S(=O)(=O)CCCc2ccccc2)CC1
CCCOc1ccc(/C=C/C(=O)NCCCCN2CCN(C(c3ccccc3)c3ccccc3)CC2)cn1
COc1ccc(CNc2nnc(SCCOc3cccc([N+](=O)[O-])c3)s2)cc1
S=C(N/N=C/c1ccccc1-c1ccco1)Nc1ccccc1
CN1CCc2cccc3c2[C@@H]1Cc1ccc(O)c(O)c1-3
Cc1c(C)c2c(c(C)c1Nc1ccccc1)CC(C)(C)O2
c1ccc2c(c1)nc(N1CCOCC1)c1c3ccccc3[nH]c21
C[C@@H](CN1CCOCC1)N[C@@H](CO)c1ccccc1
CN(C(=O)Cc1ccc(Cl)c(Cl)c1)[C@H]1CCCC[C@@]12CCCN2C
Cc1cc(C(C)(C)C)ccc1Nc1nc2ccc(C#N)cc2[nH]1
COc1ccc(C)cc1NC(=O)CSc1nnc(COc2ccccc2)n1Cc1ccco1
CCCc1nnc(S[C@H](C)c2noc(C)n2)o1
COc1ccc(F)c(C(=O)c2ncc(CNS(=O)(=O)C(F)(F)F)c3cc(OC)c(OC)cc23)c1
Nc1ncnc2c1ncn2Cc1ccc(CCCCc2ccc(C[n+]3ccc(N4CCCC4)cc3)cc2)cc1
Cc1ccc(S(=O)(=O)N2c3ccccc3[C@H]3CCC=C[C@H]32)cc1
Cn1c(SCC(=O)NCCCN2CCCC2=O)nnc1-c1ccccc1F
CC(C)OCC(=O)Nc1ccc(C(=O)N=[S@](C)(=O)N(C)C)cc1
COc1ccc(Cl)cc1-c1n[nH]c(SCC(=O)NC2CCS(=O)(=O)C2)n1
C[C@H](NC(=O)C(F)(F)F)[C@H](Oc1ccc2c(cnn2-c2ccc(F)cc2)c1)c1ccc2c(c1)OCCO2
Cc1nn(C)cc1C(=O)N1CCC[C@@H](c2ccc(C(=O)N(C)C)cn2)C1
O=C(NCc1nc(O)c2ccccc2n1)Nc1cccnc1N1CCCC1
CNC1=NCCS/C1=N\OCc1ccc(CN(C)C)o1
NC(=O)c1sc2nc3c(c(-c4ccc(Cl)cc4)c2c1N)CCCCCC3
CCN1CCN([C@@H](c2ccc(F)cc2)c2nnnn2Cc2ccc(F)cc2)CC1
COc1ccc(NS(=O)(=O)c2ccc(C)c(C(=O)N3CCCCCCC3)c2)cc1
CCOc1cccc(/C=C2\C(=O)NC(=O)N(c3ccc(C)cc3)C2=O)c1
O=C(OC[C@H]1O[C@@H](Oc2ccc(O)cc2COC(=O)C2(O)C=CCCC2=O)[C@H](O)[C@@H](O)[C@@H]1O)c1ccccc1
O=C(O)CCNC(=O)Nc1ccc([N+](=O)[O-])cc1
Cc1cc(C(=O)N2CCN(C(=O)N3CCCCC3)CC2)c2ccc(F)cc2n1
COc1cccc(N(CCCC(=O)N(Cc2ccc(Cl)c(Cl)c2)[C@H](Cc2ccccc2)C(=O)NC(C)C)S(C)(=O)=O)c1
CCc1ccc(S(=O)(=O)Nc2cc(CN3CCN(CCC(C)C)CC3)ccc2C)cc1
Cc1cc(C)c(C=C2C(=O)Nc3ccccc32)[nH]1
Fc1ccc(-c2cc[nH]c2-c2ccncc2)cc1
O=c1[nH]c(N2CCCC2)nc2c1CCN(Cc1coc3ccccc3c1=O)C2
CN(C)CCOC(=O)Cc1ccc(Cl)cc1
COc1ccccc1N1CCN(CC(=O)c2c[nH]c3ccccc23)CC1
CCCCCNC(=O)Cc1csc2nc(C)c(-c3cc(C)n(-c4cc(F)ccc4C)n3)c(=O)n12
O=C(Cn1ccc2ccc(OCc3ccccc3)cc21)NCc1ccncc1
Cc1cccc(C(=O)NCc2ccc(N3C[C@H](C)O[C@@H](C)C3)nc2)n1
NS(=O)(=O)c1ccc(NC(=O)c2cccs2)cc1
COC(=O)c1ccc(Cl)c(NC(=S)NC2CCCCC2)c1
CC(C)c1nnc2n1C[C@H](NC(=O)c1cccnc1N1CCCC1)CC2
CCOC(=O)C1=C(c2ccccc2)NC(=O)N[C@H]1c1cc(Br)c(OCC)c(OCC)c1
CN1CCCC[C@@H](CNCc2nncn2-c2ccccc2)C1=O
CC(C)CCn1cc(C2=NS(=O)(=O)c3cc(NS(C)(=O)=O)ccc3N2)c2ccccc21
CCOC(CNCCC(=O)OC)OCC
Cc1nc2c(c(C)nn2C)c(C)c1CCC(=O)N1CCCCCC1
Cn1nnnc1SCc1cc(=O)[nH]c(=O)[nH]1
O=c1cc(CN2CCN(c3ccc(O)cc3)CC2)nc2scc(-c3ccccc3)n12
CCOC(=O)N1CCC(N2CCN3C(=O)CNC(=O)[C@@H]3C2)CC1
CN(C)C1CCN(Cc2cc(COCc3ccccc3)c3cccnc3c2O)C1
Cc1cc(C(=O)N2CC[C@@H]3OCc4cnnn4[C@H]3C2)sc1C
CC(CCc1ccccc1)NC(=O)c1ccco1
Fc1cc(F)cc(SCc2cc(F)ccc2Br)c1
Cc1ccc(-n2c(N/N=C3\C(=O)Nc4ccccc43)nc3ccccc3c2=O)cc1
CCCCCCn1cnc2c(SN)nc(N)nc21
CN1CCN(CCN(C(=O)Nc2ccc(C(F)(F)F)c(F)c2)c2ccc(-c3cccc(C#N)c3)cc2)CC1
CCN(CC)S(=O)(=O)c1ccc(C(=O)NCC(=O)Nc2nc3ccccc3[nH]2)cc1
Cc1csc2[n+]1C(=O)/C(=C\c1ccc([N+](=O)[O-])cc1)S2
O=C(NCc1nccn1Cc1ccccc1)c1ccc(O)c(Cl)c1
Cn1c(=O)ccc2c(NC(=O)N[C@@H]3C[C@](C)(C(F)F)Oc4ccccc43)cccc21
CCn1cnc2c(N3CCC4(CCC(N(C)C)CC4)CC3)ncnc21
CCNC(=O)[C@@H](C)N(CCc1ccccc1)C(=O)CN(c1ccc(Cl)cc1)S(=O)(=O)c1ccccc1
COc1cccc(OC)c1Oc1cc(Nc2ccc(C#N)cc2)nnc1Cl
CN1CCC(n2cc(S(=O)(=O)c3cccc(Br)c3)c3cccnc32)C1
c1cc2c(c3c1CC1c4cc5c(cc4CCN1C3)OCO5)OCO2
CCCCNC(=O)Nc1cc(Cl)c(Nc2ncnc3cc(OC)c(OC)cc23)cc1Cl
O=C(NCCCO)NCC(CCCN1CCC(O)(c2ccc(Cl)cc2)CC1)(c1ccccc1)c1ccccc1
Cc1ccc(S(=O)(=O)Nc2ccccc2C(=O)Nc2nc3c(Cl)cccc3s2)cc1
CCO[C@H]1C[C@H](O)C12CCN(c1ncnc3[nH]ncc13)CC2
Cc1ccsc1[C@@H](CNC(=O)C1(N2CCCC2)CCCCC1)N(C)C
CCCCCCCCCCCCCCNC(C1=C(O)C(=O)c2ccccc2C1=O)c1ccccn1
CC(C)[C@H](NC(=O)[C@@H](S)Cc1ccccc1)C(=O)N1CCCC1C(=O)O
O=C(O)c1cnc(NS(=O)(=O)C2CC2)o1
O=C1CCc2cc(S(=O)(=O)N3CCCCC3)cc3c2N1CCC3
CCC(C(=O)N1CCN(c2ccccc2)CC1)n1c(C)c2cnn(-c3ccccc3)c(=O)c2c1C
CC(C(=O)NCc1ccc(C(F)(F)F)nc1SCCCN(C)C)c1ccc(NS(C)(=O)=O)c(F)c1
Cc1cccc(O)c1NC(=O)c1ccc(NC(=O)N2Cc3ccccc3C2)cc1
CC(=O)c1c(C)n(CCc2nc3ccccc3[nH]2)c(C)cc1=O
CN1CCN(C(=O)Cc2cccc(NC(=O)C34CCCN3CCC4)c2)CC1
CCC(=O)N1CCC(n2c(C)cnc2-c2cccnc2)CC1
CC(C)[C@@H](NS(=O)(=O)c1ccc(-c2ccc(OCc3cccc(C(F)(F)F)c3)cc2)cc1)C(=O)O
FC(F)(F)c1ccc(Nc2nc(-c3ccccc3)nc3ccccc23)cc1
O=C(O)c1ccc(NC2CC(=O)N(Cc3ccccc3)C2=O)cc1
Oc1c2cc(F)ccc2nc2sc(Cl)nc12
CC[C@H](C)OC(=O)C1=C(C)NC(=O)N[C@@H]1c1ccccc1Br
COCCCN1C[C@]2(CCCN(c3cc(C)ccn3)C2)CCC1=O
Cc1[nH]cnc1CSCc1ccc(Cl)cc1
C1CC2(CCN1)COC1(OO2)C2CC3CC(C2)CC1C3
Cc1ccccc1C1c2[nH]c3ccccc3c2C[C@H]2C(=O)N(C3CCN(Cc4ccccc4)CC3)CC(=O)N12
O=C(O)C1(CCCCCCOc2ccc(Cl)cc2)CO1
O=C(c1ccccc1)[C@H](OC(=O)C12C[C@@H]3C[C@@H](CC(Br)(C3)C1)C2)c1ccccc1
O=C(NCN1CCC2(CC1)OCCO2)c1ccccc1Cl
Cc1nnc([C@H]2C[C@@H]3CCN(C(=O)C4CCOCC4)C[C@H]3O2)[nH]1
Cc1ccc(C)c2sc(N(Cc3ccccn3)C(=O)Cc3ccccc3)nc12
O=C(Nc1cnn(Cc2ccc(Cl)c(Cl)c2)c1)[C@@H]1CCCO1
CCn1c(SCC(=O)Nc2cccc(O)c2)nc2c1c(=O)n(C)c(=O)n2C
CCC[C@]1(C(=O)O)CN(S(=O)(=O)c2c(C)noc2C)CC[C@H]1O
CN1C/C(=C\c2cccs2)C2=NC(=S)NC(c3cccs3)C2C1
O=C(N[C@H]1CCCN(C(=O)c2cccs2)C1)c1c[nH]nc1-c1ccccc1
c1ccc(CCN2CCC(COC(c3ccccc3)c3ccccc3)CC2)cc1
COc1cc(/C=N\NC(=O)c2cc3c(cn2)[nH]c2ccccc23)cc(OC)c1OC
CN1CCN(c2nc(N)ncc2N)CC1
Cc1ccc(C(=O)NCc2nc(-c3ccc(C)cc3)no2)cc1
C[C@H](C1CCC1)N(C)C(=O)c1cc([N+](=O)[O-])cnc1N
Cc1nc2cc(-c3ccc(F)cc3)nn2c(NC[C@@H](O)c2cccc(O)c2)c1C
Cc1cc(C)cc(N2C(=O)[C@H]3[C@@H](c4ccccc4O)N[C@@](Cc4c[nH]c5ccccc45)(C(=O)O)[C@@H]3C2=O)c1
Cn1nc(C(F)(F)F)c([N+](=O)[O-])c1Cl
CC(C)Oc1ccc2[nH]nc(-c3cc(N4C[C@H](O)[C@@H](N)[C@@H]4C)ncn3)c2c1
Cc1ccc(C(=O)Nc2ccccc2C#N)cc1C
CCC[C@@H](NC(=O)c1ccccn1)c1cnc(Nc2ccc(C)nc2)c(Cl)c1
COc1ccc(CC(=O)O)cc1-c1ccc(C(F)(F)F)c2c1CN(C(=O)OCc1ccccc1)CC2
COCC1(C(=O)N2CCc3[nH]c4ccc(Cl)cc4c3C2)CCC1
CCOc1ccc2c(c1)Oc1cc(OC(=O)c3ccccc3OC)ccc1C21c2ccccc2C(=O)N1/N=C/c1ccc(Cl)cc1Cl
Cc1cnccc1-c1cccc(OCCN(C)C)c1
CCCNC(=O)[C@H](C)N(Cc1ccccc1C)C(=O)COc1cccc2ccccc12
Fc1ccc(C2=NN3[C@@H](C2)c2ccccc2O[C@@H]3C2CCCCC2)cc1
O=C(Nc1ccccc1)c1cnc(NCCCCCO)cn1
COc1cccc(/C=C2/SC(=O)N(CC(=O)Nc3cccc(F)c3)C2=O)c1OCc1cccc(C(=O)O)c1
CCCN(Cc1ccccc1)Cc1cc(=O)n2ccc(C)cc2n1
CCC(C)C(NC(=O)c1ccccc1NC(=O)c1ccco1)C(=O)NNC(=O)c1ccncc1
Cc1nn(-c2ccc3nnc(C)n3n2)c(C)c1CCC(=O)N1CCN(c2ccccc2F)CC1
Cc1cccc(N(CC(=O)NCCC2=CCCCC2)S(C)(=O)=O)c1C
CCOc1ccc(NS(=O)(=O)c2ccc(NS(=O)(=O)Cc3cccc([N+](=O)[O-])c3)cc2)cc1
CN(C)CCCN1CCC2(CCC(C(C)(C)C)CC2)CC1
O=C(CCCOc1ccc(Cl)cc1)NCCc1ccccc1
CCOc1ccc2oc(C(=O)N3CCN(c4ccccc4OCC)CC3)c(C)c2c1
COc1cccc(NC(=O)c2sc3nc(C(F)(F)F)cc(C)c3c2N)c1
CN(CCOc1ccc(CC(Oc2ccccc2C(=O)c2ccccc2)C(=O)O)cc1)c1nc2ccccc2o1
Cn1ccc2ccc(C(=O)N[C@@H]3COCC[C@H]3Oc3ccccn3)cc21
CSCc1noc(CN2C[C@@H]3CC[C@H](C2)N(CC2CCC2)C3=O)n1
COc1cc(OC)c(N2/C(=N/C(=O)C(C)(C)C)S[C@@H]3CS(=O)(=O)C[C@H]32)cc1Cl
CC(Cc1c[nH]c2ccccc12)NC(N)=O
CCOC(=O)N1CCN(C(=O)c2oc3ccc(S(=O)(=O)N4CCOCC4)cc3c2C)CC1
O=C(NCc1cn2c(n1)SCC2)C1CCN(C2CCOCC2)CC1
CCc1ccc(CC)c(CNC(=O)CN(c2ccc(C)c(Cl)c2)S(=O)(=O)c2ccc(C)cc2)c1
CC(C)(C)Cl
Nc1cc(CN2CCC(CN3CCCCC3=O)CC2)ccn1
O=C(c1cc2ccccc2[nH]1)N1CCN(C2CCCCC2)CC1
CC1(C)OC(=O)N(c2ccc(-c3cc(-c4ccccn4)cnn3)cc2)[C@H]1c1ccccc1
CC(C)Sc1nnc(NC(=O)C2CCN(C(=O)c3ccccn3)CC2)s1
NS(=O)(=O)c1ccc(-n2cc(-c3nc4ccccc4[nH]3)c(-c3ccc(Cl)cc3)n2)cc1
CC[C@H](C)NC(=O)[C@H](Cc1ccccc1)N(Cc1cccc(Br)c1)C(=O)CCc1cccc2ccccc12
O=C(CN(Cc1c(F)cccc1Cl)S(=O)(=O)c1ccc(Cl)cc1)Nc1ccc2c(c1)OCO2
COc1cc(NC(=O)Nc2cccc(-c3cccc(N4CCCC4)n3)c2)cc(OC)c1OC
CCOCC(=O)N1CCC2(CC1)COCCN2CCOC
O=C(NCCc1n[nH]c(-c2ccc(F)c(F)c2)n1)C1CCCCC1
CCc1ccc2oc(-c3cccc(NC(=O)c4ccccc4OC)c3)nc2c1
O=C(O)CCn1cc(-c2cc(F)cc3c2-c2ccccc2C3(O)C(F)(F)F)cn1
CC(C)(C)c1ccc(C(=O)NNC(=O)c2cccc(Br)c2)cc1
COc1ccc2[nH]c3c(c2c1)CCC/C3=N\N
Nc1nccc([C@@H]2CCCN(Cc3csc(-c4cccc([N+](=O)[O-])c4)n3)C2)n1
CC1CN(CC(=O)NC2C3CC4CC2CC(C(N)=O)(C4)C3)S(=O)(=O)N(c2c(Cl)cc(Cl)cc2Cl)C1
Cc1nc2cc(OC[C@H](O)CN3CCN(CC(=O)Nc4cccc5[nH]ccc45)CC3)ccc2s1
Cc1ccc(CNC(=O)c2ccc(Cl)cc2[N+](=O)[O-])cc1
O=C1[C@@H]2CN(Cc3cccc(F)c3)C[C@@H]2C(=O)N1CCc1ccccc1
C[C@@H]1c2cccn2CCN1C(=O)/C=C/c1cccs1
C=CCOc1cccc(NC(=O)CN(c2ccc3c(c2)OCO3)S(C)(=O)=O)c1
Cc1cc([C@@H]2[C@H](c3ccccn3)NC(=S)N2Cc2ccco2)c(C)n1-c1ccc(C(=O)O)cc1
O=C(CSc1nccn1-c1ccc([N+](=O)[O-])cc1)NC1CCCCC1
Cc1ccc(S(=O)(=O)N(C)Cc2ncc(C(=O)NCCO)cn2)cc1
CCCN(CC(=O)Nc1cc(Cl)ccc1Cl)C(=O)c1ccc(N2CCCC2=O)cc1
COc1ccc(OCc2nn3c(-c4ccccn4)nnc3s2)cc1
CCCn1nnc2cc(C(=O)O)ccc21
CC(C)Cn1c(CN)c(-c2ccccc2)c2cc(C#N)ccc2c1=O
C[C@H](Cc1nc2ccccc2s1)SCCS(C)(=O)=O
CC(=O)Oc1ccccc1C(=O)OCCCO[N+](=O)[O-]
CC(C)c1ccc(-c2noc(CN(CCO)C(C)C)n2)cc1
O=C(O)c1ccnn(-c2ccc(Br)cc2)c1=O
CN(CC(=O)N[C@@H](CC(=O)O)c1ccccc1)Cc1ccccn1
Cc1cc(Cl)ccc1NC(=O)/C(Cc1nc2ccc(C(=O)c3ccccc3)cc2nc1O)=N/NC(=O)c1ccncc1
COC(=O)c1cccc(NC(=O)c2cccc3c2C(=O)c2ccccc2-3)c1C
COCCN(CC(=O)N1N=C(c2cccc(OC)c2)C[C@H]1c1cc(OC)ccc1OC)C(=O)C1CC1
CCOC(=O)C1=C(C(=O)c2ccccc2)[C@@H](c2ccccc2)NC(=O)N1
COc1ccc(C=NOCc2ccc(C(N)=O)cc2)cc1OC
Cc1ccc(-c2noc(CC[C@@H]3CCCN4CCCC[C@H]34)n2)nn1
CN(CCO)C[C@H](O)COCc1ccc2c(c1)OCO2
Cc1ccc(N(CC(=O)Nc2cc(C)ccc2C)S(=O)(=O)c2c(C)nn(C)c2C)cc1
O=C(/C=C\c1cc(Cl)c2c(c1)OCO2)Nc1nccs1
O=C(NO)C1CN(C(=O)c2ccc(-c3ccccc3)cc2)CCN1S(=O)(=O)c1ccc(Br)cc1
COC[C@@H]1CCCCN1Cc1cnc(SC)nc1
Cc1ccc(C)c(CN2C(=O)c3ccccc3S(=O)(=O)c3ccc(C(=O)Nc4cc(F)ccc4F)cc32)c1
Cn1ncc(C(F)(F)F)c1CNC(=O)NC1CCN(c2ccccn2)CC1
CC[C@H](C)[C@H](/N=C(\O)c1ccccc1)C(=O)O
Cc1c(C(O)(C(C)(C)C)C(F)(F)F)ccc(C#N)c1Cl
COc1cccc2cc(-c3ccc(C(C)=O)c(C)n3)c(=O)oc12
COc1cccc(/N=N/c2c(N)n[nH]c2O)c1
C=CCn1c(NC(=O)c2ccc(Br)o2)c(C(=O)OCC)sc1=S
CC[C@H]1[C@@H]2C[C@H]3[C@@H]4N(C)c5ccccc5[C@]45C[C@@H](C2[C@H]5O)N3[C@@H]1O
C1=C(c2nccc3c2[nH]c2ccccc23)C2CCN3CCCC/C=C\C/C=C/1[C@@H]1N4CCCC/C=C\[C@H]4C[C@]21C3
O=S(=O)(NC1CCNCC1)c1cccnc1
CC(C)c1nnc2n1CCN(C(=O)Nc1cccc(F)c1)[C@@H]2C
O=C([C@@H](Sc1nc2cc(Cl)ccc2c(=O)n1C[C@H]1CCCO1)c1ccccc1)N1CCCC1
O=C(Cc1cccs1)N1CCC(N2CC(=O)N(CC(F)(F)F)C2=O)CC1
C[C@@H]1CCCN(Cc2ccc(C(=O)Nc3ccc(N4CCOCC4)cc3)cc2)C1
NC(=O)c1ccc(C(=O)N[C@@H]2C[C@H](O)[C@H]2n2cccn2)cc1
NC(=O)c1ccc(C(=O)N2CCC[C@@H](n3nnc4cc(F)ccc43)C2)c(F)c1
C=CC(=O)Nc1cccc(OC)c1Nc1ncc(OCc2c(Cl)c(OC)cc(OC)c2Cl)cn1
Cn1c(N=[N+]=[N-])c([N+](=O)[O-])c(=O)n(C)c1=O
CC(=O)Nc1ccc(NC(=O)CCCc2ccccc2)cc1
CC[C@@H](C(=O)NC(C)(C)C)N(Cc1ccc(Cl)cc1Cl)C(=O)CN(c1ccc(C)c(Cl)c1)S(=O)(=O)c1ccc(C)cc1
Cc1cc(O)cc(C)c1[C@H](C)[C@H](N)C(=O)N[C@H](C)C(=O)N[C@@H](Cc1ccccc1)C(=O)N[C@@H](CC(=O)O)C(=O)N[C@H](C(=O)N[C@H](C(=O)NCC(N)=O)C(C)C)C(C)C
CCc1ccc2nc(N3C(=O)C(O)=C(C(=O)c4ccccc4)[C@@H]3c3ccccc3)sc2c1
O=C(c1n[nH]c2ccccc12)N1CCO[C@H](CCc2cc(O)ncn2)C1
Nc1nc(-c2ccc(NC(=O)c3c(F)c(F)c(F)c(F)c3F)cc2)c[nH]1
CCOP(=O)(OCC)C(CC)OC(=O)COc1ccc(Cl)cc1Cl
CCC(=O)C1=C(N2CCOCC2)CC(C)(C)CC1=O
CCOC(=O)C1=C(C)N=c2s/c(=C\c3ccc(-c4ccc(F)c([N+](=O)[O-])c4)o3)c(=O)n2[C@H]1c1ccc(OC)cc1
CC[C@@H](C)c1ccccc1NC(=S)Nc1cc(OC)ccc1OC
COc1ccc(S(=O)(=O)Oc2ccccc2CN(C(=O)c2ccccc2F)C(C)C)cc1
CCCCOC(=O)C(=O)/C=C(\O)c1cccn1Cc1ccc(F)cc1
CCCN(CCCCNC(=O)c1ccc(-c2ccccc2)cc1)C1CCc2nc(SC)ncc2C1
O=C1NC(=S)N(c2cccc(Cl)c2)C(=O)/C1=C/NCCN1CCNCC1
Cc1ccc(S(=O)(=O)N2C3CCC2CC(OC(c2ccc(F)cc2)c2ccc(F)cc2)C3)cc1
CC1(C)C=Cc2c(ccc3c(=O)c(-c4ccc(O)cc4)coc23)O1
CCOC[C@H]1CCCN(S(=O)(=O)N2CCC[C@@H]2c2ccco2)C1
C[C@H]1C[C@H](C(=O)N2CCN(C(=O)c3ccco3)CC2)CC(=O)N1
Cc1cc(=O)c(O)c(C(O)c2ccc(-n3ccnc3)cc2)o1
Cc1cc(C)c(CSc2ncnc3[nH]cnc23)c(C)c1
CCOC[C@@]1(C#N)[C@H](c2ccccc2)[C@@H]1S(=O)(=O)c1ccc(Cl)cc1
Cc1ccc(C23CCC(=O)N2CCCO3)c(C)c1
COc1cncc(OC)c1C1CCCC(=O)N1Cc1cccc(-c2nccs2)c1
COc1cc(S(=O)(=O)n2cncn2)c(OC)cc1Cl
C[C@H](NC[C@H]1CCSC1)c1nc2ccccc2n1C(F)F
CN(C)CCCNC(=O)CCNC(=O)c1cc(NC(=O)c2cc(NC(=O)c3cc(NC(=O)[C@H](N)CCNC(=O)c4cc(NC(=O)c5nc(NC(=O)c6nccn6C)cn5C)cn4C)cn3C)cn2C)cn1C
CC(C)C(NC(=O)C1CCN(Cc2ccc(F)cc2)CC1)C(C)C
CC(C)(C)OC(=O)COc1ccc(O)cc1
CCCn1ccnc1CNC(=O)C1COc2cc(OC)ccc2C1
O=C(Nc1ccc(Cl)cc1)Nc1ccc(Oc2ccnc3[nH]c(=O)[nH]c23)cc1
COc1ccc(NC(=O)CCOc2c(OC)ccc3cc4[n+](cc23)CCc2cc3c(cc2-4)OCO3)cc1
c1ccc(-c2csc(NC[C@@H]3CCCO3)n2)cc1
O=C1NC(=O)/C(=C/c2cnn3c(NC4CC4)nc(NC4CCCc5ccccc54)nc23)N1
COc1ccc2cc(-c3n[nH]c4ccc(C(N)=O)cc34)ccc2c1
Cc1nc(=S)[nH]c(C)c1CCC(=O)N1CCN(S(=O)(=O)c2ccc(Cl)cc2)CC1
c1ccc(CN2CCC23COC3)cc1
CN(C)C[C@@H]1C(=O)O[C@H](c2ccccc2)[C@@H]1c1ccccc1
COc1ccc([C@@H]2CC(=O)c3cn4nc(-c5ccc(C)cc5)nc4nc3C2)cc1
Cc1ccc(Sc2cncc3sc(/C=N/OCC(N)=O)cc23)cc1
CCS(=O)(=O)c1ccc(O)c(NC(=O)c2cccc(C(F)(F)F)c2)c1
CCN1CCc2n[nH]c(-c3ccccc3)c2C1
C[C@H]1CCC[C@@H](O)C1
C[C@@H]1Oc2ccc(C(=O)CCC(=O)O)cc2NC1=O
O=C(O)[C@H]1Cc2ccccc2CN1Cc1cnc(N2CCCC2)nc1
C[C@@H]1C(=O)N2CCCc3cc(NC(=O)C(=O)NCc4ccccc4)cc1c32
CCN(CC)CCCC(=O)Nc1nc(C)c(OCc2ccccc2)c(C)n1
CCc1cc(Br)cc(C)c1NC(=O)CSc1nnc(Cc2ccccc2)n1-c1ccc(Cl)cc1
CC(C)[C@H](NC(=O)Cc1ccccc1)C(=O)Nc1ccc(S(=O)(=O)N2C[C@@H](C)O[C@H](C)C2)cc1
COc1cccc(NC(=O)Nn2c(C)nc3ccsc3c2=O)c1
CN[C@@H](C)C(=O)N[C@H]1CN(C(=O)CC(C)C)c2ccccc2N(C(C)c2cccc3ccccc23)C1=O
COc1cccc(CN(C)CC(=O)N2CCC[C@@H](c3ccc4c(N)nc(C)nc4n3)C2)c1
Brc1ccc(-c2csc(Cc3ccc(Cc4nc(-c5ccc(Br)cc5)cs4)s3)n2)cc1
CC(Oc1ccc(C(=O)NCCNS(C)(=O)=O)cn1)c1ccccc1
C[C@@H]1CN(CCNC(=O)c2cnn(C)c2-n2cccc2)C[C@@H](C)O1
O=[N+]([O-])c1ccccc1S(=O)(=O)Nc1ccc(F)c(C(F)(F)F)c1
COC(=O)c1ccc(CSc2ccc3nnc(-c4cccnc4)n3n2)o1
COc1ccc(-c2cc3c(c(OC)c2)SCCN(C(=O)C2CC2)C3)cc1OC
Cc1cc(C)c(S(=O)(=O)NCC(=O)N2CCCCC2)c(C)c1
CCCS(=O)(=O)NC(=O)c1cc(C)n(-c2ccccc2)n1
Cn1c(O)nc2cc3[nH]c(-c4ccncc4)nc3cc21
Cc1ccc(C)c(N(CCCC(=O)N(Cc2ccc(Cl)cc2Cl)[C@H](C)C(=O)NCC(C)C)S(C)(=O)=O)c1
Cc1ccccc1-c1nc2scc(CCNS(=O)(=O)c3ccccc3)n2n1
CC(=O)N1CC[C@@]2(CCCN(CC3CCCCC3)C2=O)C1
CCOc1ccc2c(c1)C[C@@H](C(=O)N[C@@H]1CCc3nccn3C1)CO2
Cc1cc(=O)oc2cc(OCCCCBr)ccc12
Cc1ccc(N2CCC[C@H](c3[nH]ncc3-c3ccc(F)cc3)C2)nn1
COc1cc(CNCc2ccncc2)ccc1OCc1ccc(Cl)cc1Cl
CC1CCc2cc(C(=O)N(C)Cc3ccc(Cl)cc3)ccc2N1C(=O)c1cc(Cl)c(O)cc1O
Fc1ccc([C@@H]2Oc3ccccc3[C@H]3CC(c4ccc5c(c4)OCO5)=NN23)cc1
CCOC(=O)C1=C(C)C(CC(C)C)C(C)=N1
CCN(CC)c1ncc(N(C)S(=O)(=O)c2ccc(C)cc2)c(N[C@@H](Cc2ccc(OC(=O)N3CCCC3)cc2)C(=O)O)n1
COc1ccc(N(CC(=O)Nc2cccc(Cl)c2Cl)S(=O)(=O)c2ccccc2)cc1
Cc1cc(O)c(C(=O)/C=C/c2cccc([N+](=O)[O-])c2)c(=O)o1
O=C(NC[C@@H](c1cccs1)S(=O)(=O)c1cccs1)C1CC1
C#CCOc1ccc(/C=C2/C(=O)ON=C2C)cc1OCC
CCN(CC)S(=O)(=O)c1cc(NC(=O)NCCCl)ccc1C
Cc1csc(C(=O)C(CCCN=C(N)N)NC(=O)[C@@H]2CC[C@H]3CN(C(=O)CCc4ccccc4)CC(=O)N32)n1
C[C@@H]1C[C@@H](CNC(=O)Nc2cnc(N3CCNCC3)nc2)CCO1
Cc1ncc(-c2cc(C(=O)N3CCC[C@H](C#N)C3)c3ccc(C)c(C)c3n2)cn1
C[C@H](Cn1ccnc1)NC(=O)Nc1ccc(OC[C@@H]2CCCO2)cc1
COc1ccc([C@H](C)NC(=O)CCc2ccccc2)cc1OC
CC1(C)C(=O)Nc2nc(-c3nn(Cc4ccccc4F)c4c3CCC4)nnc21
CCN(c1ccc(OCC(=O)NCCCOC(C)C)cc1)S(=O)(=O)c1ccc(C)cc1
O=C(C(c1ccc(-c2cccc(Cc3cc(Cl)c(Cl)cc3Cl)c2F)cc1)P(=O)(O)O)N1CCCCC1
COc1ccc(C(=O)N2CCc3cc(S(=O)(=O)N(C)C)ccc32)cc1C
CC(C)CC[C@@]1(CCNC(=O)C[C@H](c2ccco2)C(C)C)CCOC(C)(C)C1
CN(CCOc1ccccc1)CCc1ccncc1
CC(C)(N)CNc1nc(-c2ccnc(N)c2)cc2cnccc12
COc1ccc([C@@H]2C=C3c4ccc(C)cc4OC(=O)[C@@H]3[C@H]3C(=O)N(c4ccc(C)c(C)c4)C(=O)[C@H]32)cc1
O=C(NC1CCCCCCC1)c1nnc(Cc2ccc(Cl)cc2)o1
CCN(CC(=O)N1CCOCC1)S(=O)(=O)c1ccc(F)cc1
CC(C)c1ccc(-n2nc3ccc(NC(=O)c4ccc(C(C)(C)C)cc4)cc3n2)cc1
CCCNC(=S)Nc1nc(N2CCCC2)cc(N2C[C@H](C)C[C@@H](C)C2)n1
COc1ccccc1C1NC(c2ccccc2OC)C2(C)CCCC1/C2=N\O
CCC(CC)O[C@@H]1C=C(C(=O)O)C[C@H](NCc2ccc(-n3cccn3)cc2)[C@H]1NC(C)=O
Cc1cccnc1-c1ccccc1OCC1=NCCN1
CCCCCOC(=O)N1CCN(C(=O)[C@H](CCC(=O)O)NC(=O)c2cc(N3CC(O)C3)nc(-c3ccccc3)n2)CC1
C[C@H](C(=O)N1CCN(c2nccs2)CC1)n1cccn1
CNc1cc(C(=O)N2CCO[C@@H](Cc3cccc(C(F)(F)F)c3)C2)ccn1
CC(=O)N[C@H](Cc1ccccc1)C(=O)Oc1ccc2ccccc2c1
O=C(Cc1ccc(OC(F)F)cc1)Nc1cccnc1N1CCSCC1
Cc1sc2ncn(CC(=O)Nc3ccc(Oc4ccc(Cl)cc4)cc3)c(=O)c2c1C
COCC(=O)N1CCO[C@@H]2[C@@H]1CC[C@H]2OCc1cccnc1
C[C@H]1Sc2ccccc2N(C(=O)c2ccnn2CC(F)F)[C@@H]1C
COc1ccc(CCNC(=O)c2cc3cccc(OC)c3oc2=O)cc1OC
CC1(C)O[C@@H]2CC3C4CCC5=CC(=O)C=CC5(C)[C@@]4(F)[C@@H](O)CC3(C)[C@]2(C(=O)CCl)O1
CC(C)c1ccc(/N=C2\CCC[C@@H]3[C@H]4CCCN5CCC[C@H](CN23)[C@@H]45)cc1
COC(=O)CSc1nc(-c2ccc(F)cc2)cc(C(F)(F)F)n1
Cc1ccc(S(=O)(=O)N2CCC(=O)N(C(COC(=O)Nc3ccccc3)Cc3ccccc3)CC2)cc1
Cc1cccc(NC(=O)C2CCN(c3nc(-c4ccc(C(C)C)cc4)no3)CC2)n1
CC(C)Oc1cc(C(=O)OC2CC3CCC(C2)N3C)c2ccccc2n1
CC(C)(C(=O)O)n1cc(NC(=O)C[C@H](O)c2cccc(F)c2)cn1
CN(CCC[C@H]1CCCO1)CCn1cc(Cl)cn1
CCN1CCN(CC(O)COc2ccc(C(C)=O)cc2)CC1
Nc1cc(Br)cc(CO)c1
CCCc1c(OCCCCCCCCC(=O)O)ccc(C(C)=O)c1O
CC1(C)CCc2c(sc3c2c(=O)n(-c2ccccc2)c2nncn32)C1
Cc1cccc(NC(=O)Cn2nnc(-c3ccco3)n2)c1C
O=C(Cn1ccc(=O)[nH]c1=O)Nc1cc(F)ccc1-n1cccn1
CN1CC2(C1)C(=N)N[C@](C)(c1cc(NC(=O)c3ccc(OC(F)(F)F)cn3)ccc1F)CS2(=O)=O
C[C@H](NC(=O)N[C@@H]1CCCN(c2ncccn2)C1)c1cccnc1
COc1cccc(CNC(=O)c2ccc3c(c2)nc2n3CCC(C)C2)c1
CCC(C)(C)NC(=O)[C@H](c1cccn1C)N(C(=O)Cn1nnc2ccccc21)c1ccc(OC)c(OC)c1
Cc1nc(N2C[C@@H](O)[C@H](Cc3cnccn3)C2)c(C#N)c(C)c1C
Cc1ccc2nc(-c3ccc(C#N)cc3)c(Cc3ccccc3)n2c1
Cc1ccc2c(c1)N(CCC(=O)NC[C@@H](C)c1ccccc1)C(=O)c1cccnc1O2
COC(=O)c1nn(-c2ccc(C(F)(F)F)cc2)c(C)cc1=O
CC(C)CC(=O)N[C@@H](CCCCN)C(=O)N[C@@H](CCCCN)C(=O)NCCCCNC(=N)N
CC(C)CCOc1ncnc2c1sc1nc3c(cc12)CSC(C)(C)C3
COc1cc(CN/C=C2/C(=O)NC(=O)N(c3ccc(F)cc3)C2=O)cc(OC)c1
CCCCCCCCC(=O)c1c(OC)oc(C=O)cc1=O
CC1(C)C[C@@]1(c1nc(CS(C)(=O)=O)no1)c1cccs1
CCCCCCCCCCNC(=S)N1[C@@H](C)CCC[C@H]1C
CCN1CC=C(c2c[nH]c3ccc(NC(C)=O)nc23)CC1
CCOc1ccc2c(c1)Oc1ncn3nc(CC#N)nc3c1C2c1ccc(Cl)cc1
CC(C)c1ccc(NS(=O)(=O)c2ccc3c(c2)sc(=O)n3CC(=O)N2CCOCC2)cc1
Cc1nc(-c2ncc[nH]2)cc([C@H]2CCCCN2Cc2cnccn2)n1
COc1nc(N)c2c(c1C#N)NC1=C(C(=O)CC(C)(C)C1)[C@@H]2c1cccs1
COCCC(=O)N1CCC(NC[C@@H]2C(C)=CCC[C@H]2C)CC1
COc1ccc([C@@H](CC(=O)O)NC(=O)COc2ccc(Cl)cc2Cl)cc1OC
CCCc1nccnc1SC
O=C(Cc1ccc(-c2ccccc2)cc1)NCCCc1ccccc1
c1ccc(CCCN2CCC(CCOC(c3ccccc3)c3ccccc3)CC2)cc1
C[C@H]1O[C@@H](c2ccccc2)OC[C@H]1N
Cc1cc(C)cc(NC(=O)[C@H]2CC(=O)N(CCc3c[nH]c4ccc(C)cc34)C2)c1
COCCCNC(=O)c1c2c(nc3onc(C)c13)CCC2
CCCOc1ccccc1C=c1sc2nc(-c3ccc(Cl)cc3)nn2c1=O
CCC(=O)N1CC2(C1)CN(C(=O)Nc1ccccc1F)[C@H](CO)c1[nH]c3cc(OC)ccc3c12
Cc1ccc(NC(=O)c2ccc(CSCc3ccccc3)cc2)c(C)c1
CCc1ccc(C(=O)C2=C(C(F)(F)F)Nc3ncnn3[C@H]2c2ccc(OC(F)F)c(OC)c2)s1
Cc1ccc(CS(=O)(=O)c2ncc(CN(CC(C)C)C(=O)C3CCCC3)n2C(C)C)cc1
O=C(NCCCN1CCCCC1)c1[nH]c2ccccc2c1Sc1ccc(Cl)cc1
COc1ccc(-c2nc(NC(=O)c3ccc(F)cc3)sc2C)c(OC)c1
Cc1ccc(S(=O)(=O)NC(=O)C2(C)CCN2C(=O)CCc2ccc(Cl)cc2Cl)nc1
COc1ccc(CNCc2ccc(N3CCCC3=O)cc2)cc1Br
CC(=O)N1CCC(n2cc(-c3cnc(N)c4oc(-c5cccc6ccccc56)cc34)cn2)CC1
CC(=O)N1c2cc(S(=O)(=O)NCCCN3CCN(c4ccccc4F)CC3)c(Br)cc2C[C@H]1C
COc1cccc(CNS(=O)(=O)c2ccc(N3CCCC3=O)cc2)c1
O=C(NN=Cc1ccccc1O)C(O)(c1ccccc1)c1ccccc1
CCc1nnc(NC(=O)[C@@H]2C[C@H]3C=C[C@H]2C3)s1
CCOc1ccccc1CNC(=O)Cn1cnc2c([nH]c3ccc(C)cc32)c1=O
O=C(OCc1ccccc1CN1CCOCC1)c1ccccc1
COC(=O)c1ccc(-c2ccc(F)cc2)nc1C
COC(=O)CCn1cc(C(=O)C(=O)Nc2ccc(OC)nc2)c2ccccc21
COc1ccc(NC(=O)N(CCCN2CCOCC2)Cc2cccnc2)c(OC)c1
Cc1cc(N(CCC#N)CCC#N)ccc1CC1N=C(c2ccccc2)OC1=O
CCCCCCCCCCOc1cccc2c1C(=O)O[C@@]2(CO)COC(C)=O
Cc1noc(C)c1CN1C(=O)[C@H]2CC[C@@H]1CN(C(=O)CCC(F)(F)F)C2
Cc1cc(Nc2ccc(Cl)cc2)nc(-n2nc(C)cc2C)n1
Cc1nc2c(NCc3cnc(C4CC4)s3)cccc2o1
O=S(=O)(OCC(F)(F)F)c1ccc(Cl)cc1
C[C@@H]1CC(C)(C)C[C@@]2(C1)NC(=O)N(CC(=O)NC(c1ccccc1)c1ccccc1)C2=O
COc1cc2c(c(O)c1OC)C(=O)C(Cc1ccccc1O)CO2
CC(Sc1nncn1C)C(=O)NCCCOc1ccc(F)cc1
Cc1cccc2ncc(C(=O)O)c(=N)n12
CSc1cccc(NC(=O)[C@@H]2CCCN(S(=O)(=O)c3ccc4c(c3)CCCN4C(C)=O)C2)c1
CCOCC(=O)N1CCC(C(=O)N[C@@H](C)c2cn3ncsc3n2)CC1
Oc1ccc(N2C(=S)N[C@@H](c3ccccn3)[C@@H]2c2ccc(-c3ccc(Br)cc3F)o2)cc1
Cc1cn2cc(C(F)(F)F)cc2c(C#Cc2cccc(-c3c(C)noc3C)c2)n1
Cc1ccc(NC(=O)C2CCCN(c3ncccn3)C2)cc1F
COc1cccc(OC)c1C(=O)N1CCc2cc(S(=O)(=O)N3CCCC3)ccc21
CCCCOC(=O)CCCCCC(=O)OCCCC
O=C(CN1C(=O)S/C(=C\c2ccc(SCCO)c([N+](=O)[O-])c2)C1=O)c1ccc(Br)cc1
O=C(NC[C@H]1CCCO1)C1CCN(S(=O)(=O)Cc2ccc(F)cc2)CC1
Cc1ccc(NC(=O)c2nc(NCc3ccncc3)ncc2Cl)cc1
CNc1ccc(S(=O)(=O)N(CCC2CC2)c2sc3ccccc3c2Cl)cc1Cl
COc1ccc(NC(=O)COc2ccc(Cl)cc2/C=C2\SC(=S)N(Nc3nc4ccccc4s3)C2=O)cc1
N=C(NCCc1ccc(Br)cc1)SCCCc1c[nH]cn1
CN(C)CC(C)(C)CN/C=C1\C(=O)Nc2ccccc21
Cc1nnc(NC(=O)[C@H](C)SCc2ccc(Br)cc2)s1
Cc1cccc(-n2c(C)nnc2SCC(=O)Nc2nc(C)c(C)s2)c1
Nc1ccccc1CCc1ccccc1
C[C@@H]1N[C@]2(C(=O)Nc3ccccc32)[C@@H]2C(=O)N(c3cccc([N+](=O)[O-])c3)C(=O)[C@H]12
Cc1cccc2nc(CSCc3nnnn3C3CC3)cn12
CC[C@@H](Oc1ccc(F)cc1)C(=O)NCCc1ccc(C(C)C)cc1
COC(=O)c1cc(CNC(=O)N[C@H](C)c2cccs2)oc1C
O=[N+]([O-])c1c(Sc2ccccc2F)nc2sccn12
Cc1ccc(NC(=O)[C@H]2CN(S(=O)(=O)Cc3ccccc3)c3ccccc3O2)c(C)c1
COc1cccc(-n2cnnc2SCc2csc(NC(C)=O)n2)c1
O=S(=O)(Nc1nccs1)c1ccc2c(c1)OCCN2c1ccccc1N1CCNCC1
Cc1cnc(N2C[C@@H](O)[C@H](CS(=O)(=O)N(C)C)C2)nc1N
CCc1c(C)sc(NC(=O)C2CCCC2)c1C(=O)OC
C=C=Cn1c([C@@H]2CC(=O)N(c3cc(C)cc(C)c3)C2)nc2ccccc21
COc1ccc([C@@H](CNC(=O)COc2ccccc2OC)N2CCCCC2)cc1
COc1cc(NC(=O)C2CCCC2)c(C(=O)O[C@@H](C)C(=O)NC(=O)Nc2ccccc2)cc1OC
CN(C)c1ccc(/C=C2\C=C(c3ccc(F)cc3)OC2=O)cc1Br
CCCCCNC(=O)C1CC(=O)OC12CCCCC2
CCOC(=O)[C@]1(C)C[C@@H](O)C1
Cc1cccc(C(=O)NCC(=O)NC2CCN(Cc3ccc(Cl)cc3)C2)c1
CC1CN(Cc2cccc(-c3ccc(-c4nc5ccccc5[nH]4)cc3)c2)CC(C)O1
O=c1cc(OCc2ccc(F)cn2)ccn1-c1ccc2c3c([nH]c2c1)CCN1CCCC31
COc1cc(/C=C2\C(=O)NC(=O)N(c3cc4c5c(c3)[C@@H](c3ccccc3)CCN5CC[C@@H]4c3ccccc3)C2=O)cc(Br)c1OCc1ccc(Cl)c(Cl)c1
COc1ccc2c(O[C@@H]3C[C@@H](C(=O)NC4(CC(=O)O)CC4)N(C(=O)[C@@H](NC(=O)OC(C)(C)C)C(C)C)C3)cc(-c3ccccc3)nc2c1
Cc1ccc(NC(=O)Cc2noc3ccccc23)nc1
COc1cc(OC)cc(-n2nnnc2SCC(=O)Nc2cc(C)ccc2C)c1
COc1ccc(C(=O)Nc2cccc(N3CCCC3=O)c2)c(OC)c1
COc1cccc(CNC(=O)[C@@H]2CCCN2C(=O)[C@H]2CCCCN2C(=O)c2ccc(Cl)cc2)c1
COc1ccc2c(c1)nc(-c1ccc(N)cc1)c1cccn12
OC(Cc1ccncc1)(Cn1cncn1)c1ccc(F)cc1F
Cc1ccc2oc(-c3cc(/N=C/c4cccc([N+](=O)[O-])c4O)ccc3Cl)nc2c1
O=c1[nH]sc2c1c(=O)c1cc(F)c(-c3ccnc(F)c3)cc1n2C1CC1
C[C@@H]1CN([C@H](C)CO)C(=O)c2cccc(NS(=O)(=O)c3ccc(F)cc3)c2O[C@@H]1CN(C)C(=O)Nc1ccc(C(F)(F)F)cc1
Cn1c(=O)[nH]c2ncc(-c3cccnc3)cc21
O=c1c2ccccc2sn1Cc1nnc(-c2cccc(F)c2)o1
O=C(COC(=O)C1CCCCC1C(=O)N1CCc2ccccc21)NCc1ccco1
CCCc1ccc(OCc2ccc(C(=O)N3CCC[C@H](C)C3)o2)c(OC)c1
COc1ccc(C[C@@]2(CCC(=O)N(Cc3ccccc3)C[C@@H]3CCC(=O)N3)CCC(=O)N2)cc1
COC(=O)Cc1c(C)c2cc(Cl)c3c(c2oc1=O)CN(C(C)(C)C)CO3
COc1ccc(C)cc1/C=C1/N=C(c2ccc(Cl)cc2)OC1=O
COc1ccc(OC)c(NC(=O)c2ccc(OC)c(COc3cccc(C)c3)c2)c1
Cc1cccc(NC(=O)c2cccnc2SCc2c(C)noc2C)n1
C[C@@H]1CC[C@H]2[C@@H](O1)c1ccccc1OC2(C)C
O=C(O)c1cc(-c2ccccc2)cc2c1ccn2Cc1ccncc1
C[C@H](Sc1nnc(-c2ccc(F)cc2)n1C)C(=O)Nc1nccs1
Cc1cc(C)c(C(=O)COC(=O)c2ccc(NC(=O)CC#N)cc2)cc1C
COc1ccc(C(=O)NCC(=O)Nc2ccc(Br)cc2C)c(O)c1
Cc1cc(N(C)C)ccc1N=Nc1ccc2ncccc2c1
O=C(CNC(=O)N1CCN(Cc2ccccc2)CC1)Nc1ccc2c(c1)OCO2
CN(C(=O)c1cn(-c2ccc(Cl)cc2)nn1)C1CCCCC1
CCCCn1nc(C(=O)Nc2nc(-c3cccnc3)cs2)c2ccccc2c1=O
C[C@@H](Oc1cccc(Cl)c1)C(=O)Nc1sc2c(c1C(=O)Nc1cccc3ccccc13)CCCC2
COc1ccc(C2(c3nc(-c4ccc5c(c4)[nH]c(=O)c(=O)n5CC(C)C)no3)CC2)cc1
Cc1ccc(SCCNC(=O)[C@@H](C)Oc2cccc3ccccc23)cc1
Cc1cc(C)c(S(=O)(=O)N2CCC[C@@H]2C(=O)Oc2ccc3c(C)cc(=O)oc3c2)c(C)c1
COc1ccc(NC(=O)c2sc3nc4c(c(-c5ccccc5Cl)c3c2N)CCC4)cc1
CCCOc1ccc([C@@H]2C(C(=O)c3ccc(OC)cc3)=C(O)C(=O)N2CCN2CCOCC2)cc1OC
O=[N+]([O-])c1cccc(-c2nc(CCNc3ccccc3)n[nH]2)c1
O=C(O)/C(=C/c1ccc(Oc2ccccc2-c2ccccc2)cc1)NC(=O)c1ccccc1
CCc1cc(=O)oc2cc(OCC(=O)NCCCN3CCOCC3)c(Cl)cc12
COC[C@H](Cc1ccccc1)NC(=O)c1cccnc1Oc1ccc(Nc2ccccn2)cc1
CCn1cc(-c2ccncc2)c(-c2ccc(OCc3ccc4ccccc4n3)cc2)n1
O=C(c1ccco1)N1CCN(c2cc(C(F)(F)F)nc3ncnn23)CC1
O=c1c2ccccc2nc(-c2ccccc2)n1/N=C/c1cc(Br)c(OCc2ccccc2F)c([N+](=O)[O-])c1
Cc1cc(C)cc(NC(=O)c2cc3ccc4ccc(C)nc4c3[nH]2)c1
Cc1ccc(C(=O)N[C@@H](C)CCc2ccccc2)cc1
OCCC#Cc1ccc(CN2CCN(CCc3ccccc3)C(CCO)C2)cc1
COc1ccc2cc(C(=O)NCCCCCCNc3c4c(nc5ccccc35)CCCC4)c(=O)oc2c1
Cc1ccc(-n2ncc(C(=O)N(C)Cc3ccc(Br)cc3)c2C)cc1
O=C(c1cc2n(n1)C(C(F)(F)F)CC(c1ccco1)N2)N1CCc2ccccc2C1
CSC[C@@H]1NC(=O)[C@@H](Cc2cn(C)c3ccccc23)NC1=O
CNc1ncnc(-c2cccnc2Oc2cc(NC(=O)c3cccc(OC(F)(F)F)c3)ccc2C)n1
c1ccc2cc(CN3CCOCC3)ccc2c1
CC(COc1ccccc1)OC(=S)N(C(=O)c1ccc2ccccc2c1)c1ccccc1
CCOc1ccc(NC(=O)C[C@@H](NCc2ccco2)C(=O)O)cc1
C[C@H](NCc1ccc(Cn2ccnc2)cc1)c1cc2ccccc2o1
O=C(C1CC1)N1C[C@H]2CNC[C@@]2(C(=O)NCCCc2ccccc2)C1
Cc1cccc(CN2CCN(Cc3ccccc3F)[C@@H]2c2ccccc2F)c1
COC(=O)CN1C(=O)CSc2ccc(S(=O)(=O)Nc3cc(Cl)ccc3C)cc21
O=C(N[C@@H](c1ccc(F)cc1)C(F)(F)F)[C@H]1C[C@H]1C(=O)O
Cc1ccc(N(C(=O)c2ccc(OC(C)C)cc2)[C@@H]2C=CS(=O)(=O)C2)cc1Cl
COC(=O)C1=C(C)N(CCc2ccc(OC)cc2)C(=O)/C1=C\c1cc(C)n(-c2cc(Cl)ccc2Cl)c1C
CCOC(=O)[C@](NC(=O)c1ccccc1Cl)(Nc1ccc(F)cc1)C(F)(F)F
COc1cc(OCc2csc(C3(c4ccc(Br)cc4)CCOCC3)n2)c2cc(-c3cn4nc(OC)sc4n3)oc2c1
CO[C@@H]1O[C@@](C)([C@H]2CC(C)=C(C)C(=O)O2)[C@H]2CC[C@H]3[C@@H]4CC=C5C(=O)C=CC(=O)[C@]5(C)[C@H]4CC[C@@]321
O=C1C=C(Nc2ccc(CN3CCC(N4CCCCC4)CC3)cc2)C(=O)c2ncccc21
Cc1nc(SCC(=O)NC2CCCC2)c2c(C)c(C)sc2n1
CCC(=O)N1CCC(S(=O)(=O)c2ccc(CNC(=O)N3Cc4ccncc4C3)cc2)CC1
C[C@H]1[C@@H](N2CCOCC2)[N+]([O-])=C2CCc3nonc3[C@@]21O
O=C(O)C(=O)Nc1nc(-c2cc(-c3ccccc3)on2)cs1
CC1=CC[C@H]2C(=O)N(N(CC(=O)c3ccc(Br)cc3)C(=O)c3ccc(Cl)cc3)C(=O)[C@H]2C1
CN(c1ccc(Cl)cc1)S(=O)(=O)c1cccc(C(=O)n2[nH]c(=O)c3cc(Br)ccc32)c1
Cc1ccc(CNC(=O)CN(c2ccc(C)cc2)S(C)(=O)=O)cc1
O=C(O)c1ccc([N+](=O)[O-])c(CS(=O)(=O)c2ccccc2)c1
CC(=O)Nc1ccc(OCCOC(=O)C2=C(C)NC(C)=C(C(=O)OCCOC(=O)c3ccc(NC(C)=O)cc3)[C@H]2c2cccc([N+](=O)[O-])c2)cc1
Cc1cccc(S(=O)(=O)N2CCC[C@@H](CC(=O)O)C2)c1
O=C(Cc1ccc(-n2cccn2)cc1)N1CCN(C(=O)N2CCCCC2)CC1
C[C@@H](NC(=O)COC(=O)C1(c2ccccc2F)CCCC1)[C@@H]1C[C@H]2CC[C@H]1C2
CO[C@@H]1CCN(c2nc(-c3c(C)cc(C)cc3C)nc3c2CN(c2cc(C(C)C)ccc2C)CC3)CC1(C)C
CC(C)[C@H]1CCCN1c1ccc(C#N)c2ccccc12
CC(C)(C)c1ccc(C(=O)c2cccc(NC(=O)[C@H]3CN(S(C)(=O)=O)c4ccccc4O3)c2)cc1
CCOc1ccc(NC(=O)[C@@H](C)N(c2ccc(C)c(C)c2)S(C)(=O)=O)cc1
Cn1sc2ccccc2c1=O
COc1ccc(N2CCN([C@H](CNC(=O)c3ccc(F)cc3)c3ccc4c(c3)OCO4)CC2)cc1
CCOC(=O)N1CCN(c2c(N3CCN(c4ccccc4OC)CC3)c(=O)c2=O)CC1
COc1ccc(NS(=O)(=O)c2ccc(OCC(=O)N3CCCCC3)c(C)c2)cc1
Cc1cc(C)c(C)c(S(=O)(=O)N[C@H](C(=O)NCCc2ccco2)C(C)C)c1C
O=C(O)[C@H](Cc1ccccc1)NCCC(=O)N1c2ccccc2C=Cc2ccccc21
CC[C@H](C)NC(=O)[C@H](C)N(Cc1cccc(Cl)c1)C(=O)CN(c1cccc(C)c1C)S(=O)(=O)c1ccccc1
CCCNS(=O)(=O)/C=C/c1ccccc1
CCOc1cnc(-c2ccn3c(-c4cccc(NC(=O)NCC(F)(F)F)c4)cnc3c2)nc1
Cn1cc([C@@H]2OCC[C@H]2CNCC2=Cc3ccccc3OC2)cn1
O[C@@H](c1nccs1)c1cccc(F)c1N1CCN(CCc2ccccc2)CC1
O=C1c2cc(S(=O)(=O)NC3CCCC3)ccc2CCCN1c1ccc(F)c(F)c1
Cc1cc(C)cc(NS(=O)(=O)c2ccc3c(c2)C(C)(C)C(=O)N3C)c1
CCc1ccc(N[C@H]2NC(=O)/C(=C/c3c(C)n(Cc4ccccc4)c4ccccc34)S2)cc1
O=C(CCCc1cn(CCN2CCCC2)c2ccccc12)NC12CC3CC(CC(C3)C1)C2
C#CCOCC12C=CC(O1)C1C(=O)N(C)C(=O)C12
C[C@@H]1O[C@@H](Oc2ccc(-c3coc4cc(O[C@@H]5O[C@@H](C)[C@H](O)[C@@H](O)[C@H]5O)ccc4c3=O)cc2)[C@H](O)[C@H](O)[C@H]1O
COc1ncccc1C(=O)N1CC=C(c2c[nH]c3ncccc23)CC1
CCCn1c(=O)[nH]c(=O)c2c1nc(-c1cccc(C(F)(F)F)c1)n2CCN1CCOCC1
NS(=O)(=O)c1cnccc1N1CCN(c2ccccc2)CC1
Cc1ccccc1CS(=O)(=O)c1ncc(CN(Cc2ccco2)C(=O)c2ccc(Cl)cc2Cl)n1CC(C)C
NCc1ccc(CNCc2cccc(-c3ccc(-c4nc5cc(C(F)(F)F)ccc5[nH]4)cc3)c2)cc1
Cc1ccc(S(=O)(=O)N(CC(=O)N[C@@H]2C[C@H]3CC[C@H]2C3)c2ccc(C)cc2C)cc1
OC(c1ccc(Cl)cc1)(c1ccc2nccc(/C=C/c3ccccc3)c2c1)c1cscn1
COc1cc2c(cc1OC)C(=O)C(CC1CCN(CC(=O)Nc3nc4ccccc4s3)CC1)C2
C=CCN1C[C@@H](C(=O)Nc2c(CC)c(C)nn2C)CC1=O
C/C(=N\NC(N)=S)[C@H]1CC[C@H]2[C@@H]3CC[C@H]4C[C@@H](O)CC[C@]4(C)[C@H]3CC[C@]12C
Cc1ccc(-c2cc(C(=O)NCc3cnc(C)cn3)cc(-n3c(=O)oc4ccccc43)c2)nc1
c1ccc(CNCC[C@@H]2CCO[C@H](c3ccccc3)O2)cc1
CCN(CC)C(=O)[C@@H]1CCCN(C(=S)Nc2cccc3ccccc23)C1
Cc1ccc(-c2ccc(C(=O)N(C)c3cccc(C)c3)s2)cc1
Cc1cccc(Cl)c1Nc1nc2cc(N3CCNCC3)ccc2n2cncc12
O=C(Nc1ncc(Br)s1)NS(=O)(=O)c1cc(Br)c(Cl)s1
Cc1ncc2c(n1)[C@]1(CCCN(C(=O)c3ccc(N4CCCC4=O)cc3)C1)CC2
CN(C)CCCNc1nc(-c2ccc(Cl)cc2NC(=O)CN2CCN(C)CC2)nc2ccccc12
Cc1cc(S(=O)(=O)Nc2cc(Cl)ccc2O)ccc1F
Cc1cc(C(=O)NC[C@H](c2ccsc2)N(C)C)ccc1[N+](=O)[O-]
Cc1cccc(CN(C(=O)CSCc2ccc(F)cc2)[C@@H](C)C(=O)NCC(C)C)c1
O=S(=O)(c1ccccc1)N1N=C(c2ccccc2)C[C@H]1c1ccccc1O
Fc1ccc(COc2cccc(-c3nnc(S)o3)c2)cc1
CN(C)CCN(Cc1ccsc1)C(=O)NCCc1ccncc1
CC(C)N(Cc1ccccc1)C(=O)C1CCCN(c2ncnc3onc(-c4ccc(F)cc4)c23)C1
c1ccc2c(CNCc3cccc4ccccc34)cccc2c1
Cc1cccc(C)c1C(OC[C@@H](O)CNC(C)C)c1c(C)cccc1C
COc1ccc2c(c1)CCNC2CCCCC1NCCc2cc(OC)ccc21
CC1(C)CC(/C=C/C=C2C=C(c3ccccc3)SC(c3ccccc3)=C2)=C/C(=C\C=C/c2cc(-c3ccccc3)[s+]c(-c3ccccc3)c2)C1
Fc1cccc(F)c1C1SCc2nc3ccc(Cl)cc3n21
N#Cc1cc(S(=O)(=O)Nc2cc(O)cc3cccnc23)ccc1F
CC(C)CC1Nc2ncnc(N3CCOCC3)c2N(Cc2ccc(Br)cc2)C1=O
O=C(Nc1ccc(Cl)cc1)C1CN(C(=O)c2cccc(-c3ccco3)c2)CC(F)(F)C1
COc1ccc(C2CC(=O)Oc3cc(C)[nH]c(=O)c32)cc1O
CCCCCn1ncc2c3sc(C)cc3n(C)c2c1=O
Cc1ccccc1CNC(=O)C(=O)NCc1ccccn1
CCC[C@@H](C(N)=O)C(C)C
CCCc1cc(NC(=O)Cn2nc(C)c(C)c(C#N)c2=O)n(-c2ccccc2)n1
CCN(CC)c1ccc(/C=N/NC(C)=O)c(O)c1
COc1ccccc1N1CC[C@H](C(=O)O)C1=O
CCCOc1cc(OC)ccc1C(=O)NCC1CCN(CCN(C)C)CC1
O=C1[C@@H](Oc2ccccc2)[C@@H](c2ccncc2)N1c1ccccc1
C[C@@H]1CN(c2ccc(F)cc2C(F)(F)F)CCN1S(=O)(=O)c1ccc(N2CCC(O)CC2)cc1Cl
Cc1ccc(CCOc2nc(N)c3ncn(C4O[C@@H](CO)[C@H](O)[C@@H]4O)c3n2)cc1
COc1ccc([C@@H]2CN(Cc3ccncc3)C[C@H]2c2cc[nH]n2)cc1
Cc1cc(=O)c(C(=O)N2CCN(Cc3ccccc3)CC2)c(CCc2ccccc2)n1C[C@@H]1CCCO1
CCCCc1ccc(CSc2oc3ccccc3c(=O)c2C)cc1
Cc1cc(CN(CC2CCCCC2)C(CC(=O)O)c2ccc(Cl)c(Cl)c2)ccc1OCCN1C(=O)CCC1=O
CC(C)(C)NC(=O)[C@H](c1cccnc1)N(C(=O)c1csnn1)c1ccc(Cl)cc1
Cn1cc(-c2nc(CN3CCO[C@H](Cn4cccn4)C3)cs2)cn1
FC(F)(F)c1ccc(N2CCCN(Cc3ccccn3)CC2)nc1
COc1ccccc1C(=O)Nc1ccccc1Sc1ncnc2scc(-c3ccccc3)c12
C[C@H](c1cccs1)N(C)C(=O)C[C@]1(c2ccccc2)CC(=O)N(CCCOc2cccnc2)C1=O
Cc1ccc(C(=O)COC(=O)c2cccc(N3C(=O)[C@H]4CC=C[C@H](C)[C@@H]4C3=O)c2)cc1C
Cn1c(SCC(=O)Nc2ccc3nc(SCC(=O)c4ccc(Br)cc4)sc3c2)nc2sc3c(c2c1=O)CCCC3
CC(C)NC[C@H](O)COc1ccc(OCCCCCCCCOc2ccc(OC[C@@H](O)CNC(C)C)cc2)cc1
O=C(CN1[C@H](C(=O)O)C[C@@H]2CCCC[C@H]21)NC1CCCC1
C/C(=C\c1ccccc1)CN1C[C@H](n2cnnn2)C[C@H]1C(=O)NCc1ccc(C)cc1
CC(C)c1nc2c(c(Nc3ccc(C(C)(C)C)cc3)n1)CCN(c1ncc([N+](=O)[O-])cc1C(F)(F)F)CC2
Cc1ccc(-c2noc(CN3CCN(C(=O)c4cn(C)c5ccccc45)CC3)n2)cc1
CC(C)N(C(=O)C1(C2CCCCC2)CCN(C(=O)[C@@H](Cc2ccc(F)cc2)NC(=O)[C@@H]2CN(C)CCN2)CC1)C(C)C
Cc1cc(N/N=C/c2cccc([N+](=O)[O-])c2)c2ccccc2n1
C[C@H]1O[C@@H](n2ccc(=O)[nH]c2=O)[C@H](O)[C@@H]1O
Cc1ccccc1-c1nc2scc(CCNS(=O)(=O)c3cccs3)n2n1
COc1ccc(Cn2c(CCC(=O)N3CCN(c4ccccn4)CC3)nc3ncccc3c2=O)cc1
N[C@@H](Cc1cccc2ccccc12)C(=O)N[C@H](C(=O)O)[C@H]1O[C@@H](n2ccc(=O)[nH]c2=O)[C@H](O)[C@@H]1O
O=C(O)c1c[nH]c2cc(Cl)c(-c3ccc(CC(=O)N4CCOCC4)cc3)cc12
O=C(NC[C@H]1CCCN(c2ccccn2)C1)c1ccn(C(F)F)n1
Cc1ccc([C@H]2C[C@@H]2CN)c(Br)c1
COC(=O)[C@@H]1[C@@H]2C(=O)N(c3ccccc3C)C[C@]23C=C[C@H]1O3
COC(=O)N1[C@@H]2C3CC4[C@@H]([C@@H]42)[C@H]3N1C(=O)OC
COc1ccc(OC)c([C@H]2CC(=O)C3=C(C2)NC(=O)C[C@H]3c2ccc(Cl)c([N+](=O)[O-])c2)c1
Cc1ccc2nc(N3CCN(C(=O)C4COc5ccccc5O4)CC3)sc2c1
CC(C)[C@@](C)(C#N)NC(=O)[C@@H](C)OC(=O)CCC(=O)c1ccccc1
COC(=O)c1cccc(N2CCCC2=O)c1
O=C(Nc1ccccn1)Nc1cccc2c1[C@@H]1CCCN1C2=O
O=C(O)CC(O)CC(=O)O
O=C1C[C@@H](c2nc3ccccc3n2Cc2c(F)cccc2Cl)CN1c1cccc(C(F)(F)F)c1
Nc1nc(O)cc([C@@H]2CCN(C(=O)Cc3ccc(Cl)cc3)C2)n1
CCCNC(=O)N1[C@H](C#N)[C@H](c2ccc(-c3ccc(S(C)(=O)=O)cc3)cc2)[C@H]1CO
N#Cc1ccccc1OCc1csc(-c2ccccc2)n1
N#Cc1c(N)sc(=S)c2ccccc12
CC(C)C[C@H](NC(=O)N1c2ccccc2NC(=O)[C@@H]1C(C)C)C(=O)N1CCC[C@@H]1C(=O)O
NC(=O)C1CCN(c2nc(-c3ccc(Oc4ccccc4)cc3)cs2)CC1
Cn1cc([C@H]2CN(C(=O)c3cscn3)Cc3ccccc32)cn1
CC(C)(C)CN1CCCC1c1ccc(NC(=O)Nc2ccccc2N2CC(C)(C)c3c(-c4ccc(F)cc4)ccc(O)c32)cc1
CCN1CCN(C(=O)Cc2ccc(Nc3ncc(F)c(Nc4ccc(C(=O)Nc5ccccc5Cl)cc4)n3)cc2)CC1
CCCOC(=O)c1ccc(O)c(OC)c1
Cc1ccc(OC(C)(C)C(=O)N[C@@H](Cc2ccc(OP(=O)(O)O)cc2)C(=O)N[C@@](C)(Cc2ccc(OP(=O)(O)O)cc2)C(=O)N[C@@H](CC(N)=O)C(N)=O)c(/N=N/c2ccccc2)c1
O=C(c1ccccc1-c1nc(-c2ccccc2)no1)N1CCCCC1
COc1ccc2ccc3ccc(OC)c(OC(C)=O)c3c2c1
COc1ccc(C)cc1[C@H](C)NC(=O)c1ccc2c(c1)NC(=O)CS2
COc1ccc(OC)c(NC(=O)CN(c2ccccc2)S(=O)(=O)c2ccccc2[N+](=O)[O-])c1
CCc1nc2ccc(Br)cc2c(=O)n1N=Cc1ccc(N(C)C)cc1O[C@H](C)CC
CCOc1ccc(NC(=O)[C@@H]2CCCN(S(=O)(=O)c3c(C)nn(C)c3C)C2)cc1
CCOC(=O)c1c(Cc2cccc(C(F)(F)F)c2)cn(Cc2ccccc2)c1C
Brc1cc(Oc2c(Br)c(Br)c(Br)c(Br)c2Br)c(Br)c(Br)c1Br
CC(C)=CCC1=C(O)C(C(=O)c2c(-c3cc4c(cc3O)OC(C)(C)C=C4)oc3c(CC=C(C)C)c(O)c(O)cc23)=C[C@@H]2c3c(c4cc(CC=C(C)C)c(O)cc4oc3=O)O[C@H]12
CCCOc1ccc(C=Nn2c(S)nnc2-c2ccc(Cl)cc2)cc1
COc1ccc(CN2CCc3c([nH]c4ccccc34)[C@@H]2c2ccc(F)cc2)cc1O
CC1CCN([C@H](c2ccc(F)cc2)c2ccc([C@@H](C)C(=O)O)cc2-c2ccc(C(F)(F)F)cc2)CC1
CO[C@@H]1[C@@H](OC(N)=O)[C@@H](O)[C@H](Oc2ccc3c(O)c(NC(=O)c4cc(CC=C(C)C)c(O)c(CN(C)C(=O)CS(C)(=O)=O)c4)c(=O)oc3c2C)OC1(C)C
CC1(C)CN1C(=O)Nc1ccc(Cc2ccc(NC(=O)N3CC3(C)C)cc2)cc1
Cn1cc(NC(=O)c2cc[nH]n2)cc(Cl)c1=O
Cc1cc(NS(=O)(=O)c2ccc(C(=O)O)cc2F)ccc1F
CCc1c(N)ncnc1N1CCC(c2nc(-c3ccc(C(F)(F)F)c(F)c3)cn2CCN2CCCC(F)(F)C2)CC1
Cc1[nH]c2ccccc2c1CC(=O)Nc1nc(CN2CCOCC2)cs1
Cc1cc(O)cc(C)c1-c1cccc(COc2ccc(OCC(=O)O)c(F)c2)c1
C#CCN1CCc2nc3nc(N4CCCC4)c(C#N)cc3c(N)c2C1
COc1ccc(/C=C2\C(=O)NC(=O)N(c3ccc(C)cc3)C2=O)c(OCc2cccc(C)c2)c1
O=C(/C=C/c1cnn(-c2ccccc2)c1)c1ccc2c(c1)OCO2
CNC(=O)C1=C(C)Nc2nc3ccccc3n2[C@H]1c1ccc2oc3ccccc3c2c1
COc1ccc(F)cc1CN1CCN(CC(=O)N2CC(=O)Nc3ccccc32)CC1
CC1CCCC(C)N1CCCCNC(=O)C(Oc1ccccc1)c1ccccc1
COCCOC(=O)C1=C(C)N(Cc2ccccc2)C(=O)N[C@H]1c1cccc([N+](=O)[O-])c1
CCCC(NC(=O)c1cc(C2CC2)[nH]n1)c1nnc2ccccn12
CN(C)[C@H](C(=O)Nc1ccc2[nH]nc(-c3cccc(S(N)(=O)=O)c3)c2c1)c1ccccc1
COS(=O)(=O)Nc1ccc(Nc2c3ccccc3nc3cc(Cl)ccc23)cc1
COc1cccc(CN(C(=O)CSCc2ccc(Cl)cc2)[C@@H](Cc2ccccc2)C(=O)NC(C)(C)C)c1
COc1ncc(-c2ccc(CNC34CC5CC(CC(O)(C5)C3)C4)s2)cn1
O=C(COc1cc(F)ccc1[N+](=O)[O-])Nc1ccccc1Br
COc1c(NC(C)=O)c(OCCN2CCCCCCC2)c(OC)c2occc12
CCc1nnc(NC(=O)CSc2nc3cc(C)ccc3[nH]2)s1
Cc1cnc(NC(=O)CSc2nnc(CNc3ccc(F)cc3)n2-c2ccccc2)s1
COC(=O)C1=C(C)N=C2SCCC(=O)N2[C@@H]1c1sccc1C
CCCCN(C)C(=O)c1cc2c(s1)N(CC)CCCC2
CCC(C)(C)C(=O)Nc1nnc(Cc2ccc(Cl)cc2)s1
CCS(=O)(=O)NC(=O)c1c(-c2ccc[nH]c2=O)c2c3occc3ccc2n1Cc1cc(F)ccc1F
CC[C@H](Oc1cccc(C)c1C)C(=O)N1CCC[C@H](C)C1
Cc1[nH]cnc1CSCC/N=C(\N)C(=O)O
Cc1ccc2nsnc2c1S(=O)(=O)N(CCO)Cc1cc2ccc(C)c(C)c2[nH]c1=O
C[C@H](NC(=O)N[C@@H]1CCC[C@H](C(F)(F)F)C1)c1ccccc1
O=C(c1ccc(Cl)o1)N(C1CCCC1)C1CC1
Cc1nnc(SCC(=O)Nc2ccc3c(c2)OCCO3)s1
COc1cccc(/C=C/C(=O)c2ccc(Br)cc2)c1
C(=NNC1=NCCN1)c1ccnc2ccccc12
N#Cc1cnc(NC(=O)Nc2ccc(CCNCc3ccc(F)cc3)c(Br)c2)cn1
Cc1ccc(NC(=S)NC2CCCCC2)cc1N1CCCC1=O
CC(C)[C@@H]1NC(=O)C(C)(C)/C=C/c2cc3cc(ccc3cn2)[C@@H](C)OC(=O)[C@@H]2CCCN(N2)C(=O)[C@H](C)NC1=O
CC(C)c1ccc(S(=O)(=O)N2CCN(C(=O)C3CCN(C(=O)c4ccc(F)cc4)CC3)CC2)cc1
COC(=O)N1CCc2ccccc2C1C(=O)NCc1ccncc1
Cc1occc1C(=O)N[C@H](C)c1ccc(F)cc1
CN1CCC=C(c2nsnc2SCCCCCF)C1
C=Cc1cccc(NC(=O)OC(C)C)c1
CCOC(=O)N=[S@](=O)(Oc1ccc([N+](=O)[O-])cc1)c1ccc([N+](=O)[O-])cc1
Cc1sc2nc(CN3CCOCC3)nc(Oc3ccc(NC(=O)c4ccco4)cc3)c2c1C
CC1(C)C2CCC1(C)C(OC(=O)c1ccccc1C(=O)O)C2
C/C=C\c1ccc(OCC(=O)NCc2cccnc2-n2cncn2)c(OC)c1
O=C(NCCc1cc2ccccc2o1)[C@@H]1CCS(=O)(=O)C1
N#Cc1ncc(Cl)c2ccccc12
CCC1(CC)C(=O)N(C(=O)NCc2ccccc2)C1N1C=NC=CN1
Nc1nc(C#CC2(O)CCCCCC2)nc2c1ncn2[C@@H]1O[C@H](CO)[C@@H](O)[C@H]1O
CCCOC(=O)[C@@H]1CCCC[C@H]1C(=O)OCCC
CCOC(=O)N1CCN([C@H](c2ccccc2)c2sc3nc(CC)nn3c2O)CC1
CC(=C/C(=O)O)/C=C/C=C(C)/C=C1\CCCc2ccccc21
O=C(NCCc1ccccn1)c1cc(-c2ccco2)n(-c2ccc(Cl)cc2)n1
Cc1ccc(Oc2c(C=O)c(C)nn2-c2ccccc2)cc1
Cc1cc(C)c(/C=C2\C(=O)Nc3ccc(-c4csc(-c5ccccc5)n4)cc32)[nH]1
Cc1onc(-c2ccccc2)c1C(=O)Nc1cccc(OC(C)C)c1
Cc1cc(C(=O)COc2ccccc2C(N)=O)c(C)n1C1CC1
COc1ccc(-c2cc(C(F)F)nc(NN)n2)cc1
COc1ccccc1[C@@H](CC/N=C/c1ccc(N(C)C)cc1)[C@H]1CCOC(C)(C)C1
CCOC(=O)c1oc2cc(O)cc(O)c2c(=O)c1-c1cccc(Br)c1
Cc1ccc2c(c1)OC(C)(C)C[C@@H]2NC(=O)[C@H](C)Oc1ccc2c(c1)CCCC2
CCC(=O)NC(=S)Nc1cccc(NC(=O)c2ccco2)c1
COc1cc(OC)cc(N(CC2CC2)c2ccc3ncc(-c4cnn(CCN5CCNCC5)c4)nc3c2)c1
COc1ccccc1-c1nnc(S[C@H](C)C(=O)Nc2ccc(Oc3ccccc3)cc2)o1
O=C(NCc1nnc(S)n1-c1ccc(F)cc1)c1ccc(S(=O)(=O)N2CCOCC2)cc1
CC(C)[C@H](C(=O)NCc1ccccc1)c1ccc(Cl)cc1
O=C(c1ccc(F)cc1)N1CCN(c2ccc(OCCCN3CCCCCC3)cc2)C(=O)C1
COCCCN1C(=O)C[C@](CC(=O)N[C@H](C)c2nc3cc(C)ccc3[nH]2)(c2ccccc2)C1=O
Cc1ccc(/C(=N/O)NCc2ccc(C)o2)c(Oc2cccc(F)c2)n1
CCS(=O)(=O)N1CCC(C(=O)N2N=C(C)C[C@]2(O)C(F)F)CC1
COc1ccc(NCCOc2ccccc2)c(C2c3cc(OC)c(OC)cc3CCN2CCOc2ccccc2)c1
CCCCCCNC(=O)N[C@@H]1c2ccccc2CSc2ccccc21
O=C(Nc1ccc(Br)c(C(F)(F)F)c1)c1ccc(N2CCOCC2)nc1
CC(C)c1nc(CN[C@H]2CCCN(c3cccnn3)C2)no1
COC(=O)c1ccc(CN2C(=O)S/C(=C/c3ccc(-c4ccc(C)c([N+](=O)[O-])c4)o3)C2=O)o1
Cc1ccc2c(c1)c(Sc1ccccc1Cl)c(C)n2CC(=O)O
N[C@@H]1CCN(c2ncc(C(=O)Nc3ccc(OC(F)(F)F)cc3)cc2-c2cncnc2)C1
O=C(c1cocn1)N1CCC2(CC1)COC(COCc1ccccn1)C2
Cc1ccc(N(C)C(=O)C2(c3ccccc3)CC2)cc1C
COCCn1c(S[C@H](C)C(=O)Nc2nc(-c3ccc(F)c(F)c3)cs2)nc2ccccc21
Cc1ccccc1Nc1oc(-c2ccccc2)nc1-c1cccs1
Cc1ccc(Nc2nc(CN3CCOCC3)nc3sc(C)c(C)c23)cc1
O=C(CN1CCC[C@@H](C(F)(F)F)C1)Nc1ccc2c(c1)OCCO2
CC(=O)N1CCCC[C@@H]1c1cnc(Cl)cc1C
CC1=C[C@H]2N(c3ccccc31)[C@@H](C(=O)c1ccc([N+](=O)[O-])cc1)[C@@H](C(=O)c1ccc(F)cc1)[C@@]21C(=O)Nc2ccccc21
CCc1ccc(-n2c(=O)c3c(n2CC(=O)NCc2ccc4c(c2)OCO4)Oc2ccc(Cl)cc2C3)cc1
COc1ccc(/C=C/c2cc(OC)c(CCCCCCCCCCO)c(OC)c2)cc1
COc1ccc(C(=O)NC2CCCCCC2)cc1COc1cccc(C)c1
N#Cc1cnc(C#N)c(NCc2ccc(Cl)cc2)n1
O=C(O)CN1C(=O)/C(=C/c2cc(Cl)ccc2O)SC1=S
CC(=O)N(CCN(C)C)c1nc2cc3c(cc2s1)OCCO3
N[C@H]1CN(c2c(F)cc3c(=O)c(C(=O)O)cn(C4CC4F)c3c2Cl)CC12CC2
CCCCCCNC(=O)c1nn(CCN2CCC(N3CCCC3)CC2)cc1-c1ccc(Cl)c(Cl)c1
COC(=O)[C@@H]1O[C@H]1c1cnc(C)s1
CN(Cc1ccc2c(c1)OCCO2)C(=O)CCc1nc(-c2cccs2)no1
CC(C)[C@H](C)N(C1CC1)S(=O)(=O)c1ccc(C(=O)N(C)C)cc1
CN(Cc1cccc(C(F)(F)F)c1)C1CCN([C@H]2CCN(CC(F)(F)F)C2=O)CC1
O=C(CCC(=O)c1ccc2c(c1)OCCO2)NCc1ccc2c(c1)OCO2
CC(C)(C)NC(=O)[C@@H]1CC[C@@H]2[C@@H]3CC[C@@H]4NC(=O)C=C[C@]4(C)[C@H]3CC[C@]12C
Cc1cccc[n+]1CCCCc1ccc(CCCC[n+]2ccccc2C)cc1
O=C1N=C(O)S/C1=C\c1ccc(OCCC2CCCCC2)c(C(F)(F)F)c1
CN(C)c1nc(-c2ccccc2)nc(-c2ccc(Cl)cc2)c1C#N
COc1ccc(Cn2c(-c3ccco3)nc3oc4cc(OC)ccc4c(=O)c3c2=O)cc1
O=C(Nc1ccc(OC2CSC2)cc1)C1(c2ccccc2)CCCC1
CN1C[C@H]2CNC[C@@]2(C(=O)N(C)Cc2cc(-c3ccccc3)on2)C1
CC(C)=CC(=O)C/C(C)=C/CC[C@@]1(C)Oc2oc3cc(O)ccc3c(=O)c2[C@H]1C
Cc1nn(C)c(Oc2cccnc2)c1CNc1cnc2ccccc2c1
COc1ccc(S(=O)(=O)N(CC(=O)NC[C@H]2CCCO2)c2ccc(C)cc2)cc1Br
Cc1nc2c(c(C)nn2-c2c(Cl)cc(Cl)cc2Cl)c(=O)[nH]1
Cc1sc(-c2cnccn2)nc1OC(=O)N1CCN(C)CC1
CCCC(=O)C(c1ccc(Cl)c(Cl)c1)C1CCNCC1
Cc1nc2ccccn2c1P(=S)(c1ccccc1)c1ccccc1
N#Cc1cccc(-c2cc(-n3cccn3)ncn2)c1
C[S@@](=O)Cc1ccc(Cl)c(NCCc2ccc3c(c2)CCO3)c1
O=C(NN1CCOCC1)c1ccc([N+](=O)[O-])cc1
O=S(=O)(c1ccc2c(c1)OCCO2)N1CC[C@@H](OCc2ccccn2)C1
Cc1ccc(Cn2c(C)cc3c(c2=O)C(c2cccs2)C(C#N)=C(N)O3)cc1
CCc1ccc(CNCCCNCCCCCCCCNCCCNCc2ccc(CC)cc2)cc1
O=C1Nc2cc(Cl)c([N+](=O)[O-])cc2/C1=C/c1cccc(Br)c1
CCOc1ccc([C@H]2C(C(=O)Nc3ccccc3)=C(C)N=c3sc(=Cc4ccc(O)c(OC)c4)c(=O)n32)cc1
O[C@H]1[C@H](O)CO[C@@H](OCCOc2ccc3ccccc3c2)[C@@H]1O
CC(C)CN1CCC2(CC1)NC(=O)N([C@H]1CCCN(C(=O)CC3CCCCC3)C1)C2=O
O=S(=O)(Oc1cccc(Br)c1)C1CC2OC1C(c1ccc(/C=C/c3cc(O)cc(O)c3)cc1)=C2c1ccc(O)cc1
COCC(=O)N1CCN(C)C[C@H]1C(=O)NCCc1noc(CO)n1
COC(=O)[C@@H](NC(=O)c1cc(-c2c(OC)cccc2OC)n(-c2ccc(F)cc2)n1)C1CCCCC1
O=C(Cc1cc(Cl)c2c(c1)OCCCO2)Nc1ccc(F)c([N+](=O)[O-])c1
Cc1nnc(SCC(=O)N[C@H](C)[C@@H]2C[C@H]3CC[C@H]2C3)n1Cc1ccccc1
CCCC[PH](CCCC)(CCCC)Cc1ccc(NC(=O)CN/C(=N/C(C)C)NC(C)C)cc1
COc1ccc(NC(=O)CSc2nc3nc(C)ccc3o2)c(OC)c1
CN(C)c1nc(O)cc([C@H]2CCN(C(=O)CN3Cc4ccccc4C3=O)C2)n1
O=C(Cc1cccnc1)N1N=C(c2ccc(Br)cc2)C[C@]1(O)C(F)(F)F
COc1ccc(S(=O)(=O)N(Cc2ccc3c(c2)OCO3)[C@H](Cc2ccncc2)C(=O)O)cc1
C=C1CC[C@H]2[C@@](C)(C(=O)OC)CCC[C@]2(C)[C@H]1CCc1ccoc1CN(C)CC(=O)OCC
Oc1cccc2c1OCCCO2
C=CCc1cc(C=Nn2c(-c3cc(C(C)C)c(OCC)cc3C)nc3ccccc3c2=O)cc(OC)c1O[C@H](C)C(=O)OCC
COC(=O)Nc1sc(C(=O)N(C)C)c(C)c1C(=O)OC
N=C(N)NCCC[C@H](NC(=O)OCc1ccccc1)C(=O)N[C@H]1CCN([C@@H](CC(=O)O)C(=O)N[C@@H](Cn2ccc3ccccc32)C(=O)O)C1=O
C=CC(=O)Nc1ccc2nc(SC)n(Cc3ccccc3)c(=O)c2c1
COc1ccc(CC(OC(=O)/C=C/c2ccc(OCc3ccccc3)cc2)C(=O)NO)cc1OC
C[C@H]1[C@H](/C=C/c2ccc(-c3ccccc3C#N)cn2)[C@@H]2[C@@H](C)OC(=O)[C@]2(c2cc[nH]n2)CC1(F)F
COC1CCC2(CC1)Cc1ccc(C(F)(F)F)cc1C21N=C(N)N(C)C1=O
O=C1NC(=O)N(c2ccccc2)C(=O)/C1=C/c1ccoc1
CC(C)(C)[C@H](CN)C(=O)O
S=C1NN=C2C(=C3CCCC4C5CCCCC5N2C34)N1
Cc1ccc(NC(=O)N2CCC3(CCc4cccc(Cl)c4O3)CC2)cc1
CCOC(=O)CCC(=O)Nc1scc2c(C(=O)OCC)nn(-c3ccc(F)cc3)c(=O)c12
COc1ccc(-c2noc(/C(=N\O)c3cc(OC)c(OC)c(OC)c3)n2)cc1
CCOc1cc2c(cc1NC(=O)c1cc(OC)ccc1Br)O[C@@H](C)C2
OC[C@@H]1OCO[C@H](CO)C1O
Cc1nccn1-c1ccc(-c2cn(CC(=O)Nc3cccc(Cl)c3Cl)nn2)cc1
Cc1noc(C(=O)NCCN2CCOCC2)c1Cl
COc1ccc(/C=N/NC(=O)C2C(C=C(Cl)Cl)C2(C)C)c(OC)c1
NCCC[C@](O)(PO)P(=O)(O)O
COc1cccc(/C=N/NC(=O)c2ccc(C(C)(C)C)cc2)c1O
Cc1ccc(-c2csc([S@](C)=O)c2C#N)cc1
NC1CC1(F)c1ccccc1
CN1CC[C@]2(C)c3cc(OC(=O)Nc4ccccc4)ccc3N(Cc3ccccc3)C12
C=CCn1c(Cc2ccccc2)nnc1SCC(=O)Nc1ncc(Cc2ccc(F)cc2)s1
C[C@H](NC(=O)c1cc2ccccc2oc1=O)c1ccc(-n2ccnc2)cc1
Cc1nnc(CN(C)C(=O)NCC[C@@H]2CCCCN2CC(C)C)o1
O=C(C1CC1)N1CC[C@H]2C(=O)N(c3ccsc3)CCO[C@H]2C1
CCc1cccc(CC)c1NC(=O)c1ccc(N2C(=O)[C@H]3CC=CC[C@@H]3C2=O)cc1
COc1ccc(N2CCN(C(=O)CN(c3ccc(F)cc3)S(=O)(=O)c3ccc(OC)c(OC)c3)CC2)cc1
CCOc1ccccc1CNCc1coc(-c2ccc(F)cc2)n1
C[C@@H]1CC(=O)NN=C1c1ccc(N(C)C)c([N+](=O)[O-])c1
O=C(CCCN1C(=O)/C(=C/c2cccs2)SC1=S)Nc1ccccc1O
CC1=C(C(=O)Nc2ccc(C)cc2)C(c2cccc([N+](=O)[O-])c2)C(C(=O)Nc2ccc(C)cc2)=C(C)N1
O=Cc1sc2ccccc2c1OC(=O)c1ccccc1
O=[N+]([O-])c1ccc(COc2ncnc3ccccc23)cc1
CCCNC(=O)Oc1ccc(C2=NCCS2)cc1
COc1ccc([C@@H]2CN(CC3CCC3)C[C@H]2NC(C)=O)cc1
COc1ccc(-c2cc3c(s2)C2(CCN(Cc4ccccc4)CC2)OC(OC)C3)cc1
N#Cc1cc2c3c(c1)c(O)c(C(=O)NCC(=O)O)c(=O)n3CC(c1ccc(C(F)(F)F)cc1)S2
O=S(=O)(c1ccc(Br)s1)N1CCC(c2cccs2)CC1
COc1cc(/C=N/Nc2nnc3c(n2)[nH]c2c(C)cccc23)cc(OC)c1O
C[C@]1(O)CC[C@@H](Nc2c(C(N)=O)cnn3cc(-c4cncnc4)cc23)CC1
O=[N+]([O-])c1cccc(S(=O)(=O)NCc2ccccc2CN2CCCCC2)c1
CCOc1cc(-c2nncn2C)ccc1Nc1ncc2cc(C)nc(N[C@@H](C)C(C)(C)C)c2n1
CC(=O)Nc1sc2c(c1C(N)=O)CCCCCC2
C=CCOc1c(Br)cc(/C=C2\SC(=Nc3ccc(OC)cc3)NC2=O)cc1OC
NC(=O)CC[C@H](N)C(=O)NS(=O)(=O)OC[C@H]1O[C@@H](n2cnc3c(N)ncnc32)[C@H](O)[C@@H]1O
O=C(CN1CCC(c2nc(-c3cccs3)no2)CC1)Nc1ccccc1Br
CCNC(=S)Nc1ccc(O)cc1
COc1cccc([C@@H]2NC(=S)N(c3ccccc3)C(C)=C2C(=O)Nc2cc(C)on2)c1OC
Cn1c(=O)c2c(nc(CN3CCN(C(=O)c4ccco4)CC3)n2Cc2ccc(F)cc2)n(C)c1=O
CCOc1ccc(S(=O)(=O)N(CC(=O)NCCO)C2CCCCC2)cc1
COC(=O)[C@@H](C)NCC(=O)Nc1cccc2c1C(=O)c1c(NC(=O)CN[C@H](C)C(=O)OC)cccc1C2=O
O=C1CCCN1c1cccc(CNS(=O)(=O)c2ccc3c(c2)CCN3C(=O)C2CC2)c1
CCOCOc1ccc2c(N3CCNCC3)cc(=O)oc2c1C
Cc1nc([C@H]2CCCN(CC(=O)NCC(C)C)C2)cc(N2CCCC2)n1
O=C(NCCO)N1c2ccccc2Sc2ccccc21
C#C/C=C(\c1ccc(OC(F)(F)F)cc1)c1ccc2nc(N)n(S(=O)(=O)C(C)C)c2c1
Nc1cccc(Br)c1OCC(F)F
Cc1cc(-c2ccccc2)nc(S[C@H](C(=O)O)c2ccccc2)n1
CCCCCOc1ccc2cc(-c3noc([C@@H]4[C@@H](O)CCN4C(=N)N)n3)ccc2c1
O=C(Nc1nc(-c2ccccc2)cs1)c1ccc2c(=O)n3c(nc2c1)CCCCC3
COc1ccc(CCN2C(=O)/C(=C\c3cn(C)c4ccccc34)SC2=S)cc1OC
CC(C)Cn1c(S[C@@H]2CCCCC2=O)nnc1-c1ccc(Cl)cc1Cl
CCCc1ccc(C(=O)CSc2nnc(-c3ccc[nH]3)o2)cc1
CCOC(=O)C1=C(C)NC2=C(C(=O)c3ccccc32)[C@H]1c1ccc(OCc2cccc(C)c2)c(Br)c1
CC(C)n1cc(/C=C(\C#N)S(=O)(=O)c2ccccc2)c2ccccc21
NC(=S)N/N=C/c1c[nH]nc1-c1ccccc1
O=C(O)CSc1nnc(-c2ccc3c(c2)OCO3)o1
O=c1[nH]cccc1S(=O)(=O)CC[C@@H]1OCC[C@@]2(S(=O)(=O)c3ccc(Cl)cc3)c3c(F)ccc(F)c3OCC12
COc1ccc([C@@H](C)NC(=O)C2CCN(Cc3ccccc3C)CC2)cc1
CN(C)CCCNc1nc2c3ccc(O)cc3ccc2c2ccccc12
C#CCO/N=C1\C[C@H](C)C[C@@H]2O/C(=C\CC(C)C)[C@](C)(O)[C@H]12
C[C@H](NC(=O)OC(C)(C)C)c1nc(-c2cnn(C)c2)no1
COc1cc(CO)cc(Br)c1OCC(=O)Nc1ccccc1
CC(=O)c1c(Cl)n(C2O[C@H](CO)[C@@H](O)[C@H]2O)c2cc(Cl)c(Cl)cc12
O=C(CN1CCCCCC1=O)Nc1ccccc1N1CCCCCC1
C[C@@H](NC(c1cc(-c2nnc([C@](C)(N)Cc3ccc(F)cc3)o2)cc(N(C)S(C)(=O)=O)c1)C(F)(F)F)c1ccc(F)cc1
CC(C)[C@@H]1N=C(C2CCCCC2)c2cc(Cl)ccc2NC1=S
O=C(Cc1ccc(F)cc1)Nc1nc2nn(CCCc3ccccc3)cc2c2nc(-c3ccco3)nn12
COc1ccc(-c2nnc(CN(C)C(=O)CCCOc3ccccc3)o2)cc1OC
CCOC(=O)CN(Cc1ccc(OC)cc1)c1ccc([N+](=O)[O-])cc1[N+](=O)[O-]
Cc1c(CC(=O)O)c(-c2ccncc2F)nn1C(c1ccc(F)cc1)c1ccc(F)cc1
CS(=O)(=O)NCCc1ccc(C(=O)NCC2(c3ccccc3)CCCC2)cc1
Cc1cc(S(=O)(=O)N2CCOC[C@@]23CCOC3)ccc1C#N
Cc1ccc(S[C@@H](C)C(=O)NCCCc2nnc(N)s2)cc1
CCC(Cc1cc(F)c(OC)c(CNC(=O)c2ccc(C(F)(F)F)cc2)c1)C(=O)O
CCCCC[C@]1(CC)C[C@H](CC)[C@H](CC(=O)O)OO1
Cc1ccc(Cl)cc1N1CCN(C(=O)COc2ccc(S(=O)(=O)NCCc3ccccc3)cc2)CC1
Cc1ccc(-c2ccc(CCC(C)(C(=O)NO)S(C)(=O)=O)cc2)cc1C
COc1ccc(OC)c(CNC(=O)[C@@H](C)NC(N)=O)c1
O[C@@H]1CC=CCCC=CCCC[C@H]1O
C[C@@H]1c2ccccc2CN1CC1=NCCN1
COc1cc(C(=O)NC(c2nc(C(=O)N[C@H]3CCCc4ccccc43)cs2)C(C)C)cc(OC)c1OC
COc1ccc(N2C[C@@]34C=C[C@@H](O3)[C@H](C(=O)OCc3ccccc3)[C@@H]4C2=O)cc1
Nc1ccccc1NC(=O)c1ccc(C(=O)CNC(=O)c2ccccn2)cc1
CCCCC[C@H](C)OC(=O)/C=C/c1ccc(O)c(O)c1
CN(c1ccccc1)c1nc(C(F)(F)F)ccc1-c1nnnn1C
COC(=O)c1ccc(CO[C@H](CN2CCN(C(=O)Cc3ccccc3)CC2)c2cccc(OC)c2)cc1
NC[C@@]12C[C@H]3C[C@@H](C1)[C@H](O)[C@H](C3)C2
Cc1nc2cnccc2n1CC1CCN(C(=O)C=C(c2ccccc2)c2ccccc2)CC1
Cc1cc(C)c(-c2csc(NC(=O)C3=COCCO3)n2)cc1C
Nc1nc(O)c2ncn([C@H]3C[C@@H](CO)C=C3F)c2n1
O=c1nc2n(c3ccccc13)CC/C2=C\c1ccoc1
CCCNC(=O)[C@H](Cc1ccccc1)N(Cc1cccc(Cl)c1)C(=O)CN(c1cccc(C)c1)S(=O)(=O)c1ccc(Cl)cc1
CCC[C@@H](C)N(C)CC(=O)Nc1cccc(S(C)(=O)=O)c1
O=C(CN1C(=O)C(=O)c2ccccc21)c1ccccc1
CC[C@H](C)[C@H](NC(=O)Nc1ccc(OC(F)(F)F)cc1)C(=O)O
CC(CCc1ccc(C2=CCCCCC2)cc1)(C(=O)NO)S(C)(=O)=O
COC(=O)CSc1nc2nc3c(cn2n1)C(=O)C[C@H](c1ccc(OC)cc1)C3
Fc1ccc(CNCc2cn3c(-c4ccc(Br)cc4)nnc3s2)cc1
C[C@H](c1ccccc1)n1c(=O)[nH]c(O)c([C@@H]2OC(=O)c3ccccc32)c1=O
CC(C)C[C@H](C(=O)O[C@H](C)C(=O)NC1CC1)N1C(=O)c2ccccc2C1=O
COc1ccccc1CCNCc1cc(OC)c(OC)cc1Br
Cc1cc(C)nc(NCCC(=O)N2CCCC[C@@H]2c2cc(C(=O)NC3CCCC3)[nH]n2)n1
Cc1cccc(-c2c3c(=O)n(C)c(=O)n(C)c3c3n2CCO[C@@H]3c2ccccc2F)c1
COc1ccc(/C=C/C(=O)NCC(=O)N/N=C(/C)c2ccc(Cl)cc2)cc1
CCCCOc1ccc([C@@H]2CC3=Nc4ccccc4N(C(=O)C(F)(F)F)[C@H](c4ccccc4)C3=C(O)C2)cc1
CC(=O)Nc1ccc(/C=C/C(=O)C(=O)NC(C)(C)C)cc1
CCCCCCCCCCCCCCC[N+](C)(C)CCOP(=O)([O-])OCC
CCOc1nc(S(=O)(=O)c2ccc(C)cc2)cc(O)c1F
O=C1CC(c2ccc(C[C@H](NS(=O)(=O)c3ccccc3)c3nc4ccccc4[nH]3)cc2Br)S(=O)(=O)N1
O=C(Nc1ccc(F)c(F)c1)c1cc(Cl)ccc1O
C[C@H]1Cc2cc(S(=O)(=O)N3CCCC3)ccc2N1S(=O)(=O)c1ccc(Cl)cc1
O=S(=O)(c1cccc(C(F)(F)F)c1)N1CCC(CO)(CCCc2ccccc2)CC1
CCN(CC)c1ccc(S(=O)(=O)N2CCOCC2)cc1NC(=O)COC(=O)/C=C/c1ccco1
CC1CC(C(=O)N2CC[C@]3(C2)C(=O)N(C)C[C@H]3c2ccccc2)C1
O=C(OC1CN2CCC1CC2)C(O)(CN1CCOCC1)c1ccccc1
Cn1cc(-c2ccc3nc(C(C(=O)NCCS(N)(=O)=O)S(=O)(=O)Cc4ccc(C(F)(F)F)cc4)sc3c2)ccc1=O
Cc1cc(N2C(=S)N[C@H](c3ccccn3)[C@@H]2c2cccn2C)ccc1Br
CC(C)C[C@H](NC(=O)NCc1cn(Cc2cccc(OCc3ccccc3)c2)nn1)C(=O)NO
NC(C(=O)O)[C@H]1O[C@@H](n2ccc(=O)[nH]c2=O)[C@H](O)[C@@H]1O
Cc1nc2ccc(NC(=O)NCC(C)(C)N3CCCCC3)cc2o1
O=C1C=C(c2cc(Cl)cc(Cl)c2)C[C@@H](c2ccc3c(c2)OCO3)C1
C[C@@H]1CCC[C@@H](C)N1C(=O)COC(=O)Cn1cnc2c1c(=O)n(C)c(=O)n2C
Cc1coc2nc3oc(=O)cc(C)c3cc12
CCN1CCN(c2ncnc3c2sc(=S)n3-c2ccccc2)CC1
CCOC(=O)C1=C(COC(=O)[C@@H](C)Oc2ccc(C)cc2)NC(=O)NC1
COc1ccc([C@H]2CC(c3ccccc3)=NN2C(=O)COC(=O)c2cccc(S(=O)(=O)N(C)C)c2)cc1
Cc1cc(C(=O)N2CCC(N3CCC[C@@H](C(=O)NCc4ccccc4)C3)CC2)n[nH]1
Cc1ccc(NC(=O)c2ccc(CN3CCN(C)CC3)cc2)cc1-c1ccc2cccnc2c1
Cc1ccc(CN(CCCn2ccnc2)Cc2cnn(C)c2)s1
CN(C)c1ncc(-c2ccccc2F)c([C@@H]2CCCN(C(=O)c3n[nH]c4c3CCCC4)C2)n1
C/C(=N\OC(=O)N(C)C)c1ccc(Sc2cc(F)cc(C3CCOCC3)c2)cc1
Cc1nc(N)ncc1C(=O)N1CCC[C@H](CCc2cccc(C(F)(F)F)c2)C1
CCOc1ccc(-[n+]2c(-c3ccc(Br)cc3)cn3c2CCCCC3)cc1
COCc1cc(C)n(CC(=O)Nc2ccc([N+](=O)[O-])cc2)c(=O)c1C#N
CC[C@H](C)NCC(=O)Nc1cc(C(F)(F)F)cc(NC(=O)CN[C@@H](C)CC)c1Cl
O=C1N[C@H]2C[C@@](CO)(O1)[C@@H](O)[C@@H](O)[C@@H]2O
C[C@H](NC(=O)C1CC1)c1nnc2n1CCN(CC(c1ccccc1)c1ccccc1)CC2
CC1=C[C@]2(C)C(=C(C)[C@H]3[C@H]4[C@@H]2C(=O)C2=C[C@](O)(Cc5ccc(cc5)O[C@@H]4[C@@H]4[C@@H](C)C[C@@H](C)C[C@@H]34)NC2=O)[C@@H]1C
CC(=O)Nc1ccc(NC(=O)c2ccc(-n3cncn3)cc2)cc1Cl
COc1ccc(Sc2ccc(Cc3c[nH]cn3)cc2)cc1
C[C@@H](C1CCC2[C@H]3C(=CC[C@]12C)[C@@H](C)[C@]1(CCC(=O)O1)[C@@H]1O[C@H]31)[C@H]1C[C@@]2(C)O[C@@](c3cccnc3)(O1)OC2(C)C
Cc1ccc(NC(=O)CCc2nnc(SCC(=O)c3cn(C)c4ccccc34)n2C)cc1Cl
CCCO[C@@H]1CCCN(C(=O)c2ccc(-c3ccc(C(N)=O)o3)cc2)C1
O=C(/C=C/c1cccc(Cl)c1)Nc1nc(-c2ccc([N+](=O)[O-])cc2)cs1
O=[N+]([O-])c1ccc(/N=N/C2=C3CCCCN3CCC2)cc1
COc1ccccc1NC(=O)c1nnn(CC(=O)Nc2ccccc2F)c1N
Cc1ccc(Cl)cc1N1CCN(CCCNC(=O)c2cccc3c(=O)c(C)c(-c4ccccc4)oc23)CC1
Cc1ccc(NC(=O)NCc2cocn2)cc1C(=O)NC(C)C
CSc1ccc([C@H]2c3cccn3-c3ccccc3CN2C(=O)Nc2ccc(C)cc2C)cc1
Cc1[nH]c(/C=C2\C(=O)N(CCCN(C)C)c3ccc(F)cc32)c(C)c1C(=O)N1CCOCC1
COc1ccccc1N1CCN(CCCn2cnc3c(cnc4ccc(C)cc43)c2=O)CC1
CCOC(=O)CSc1nc2c(c(=O)n1-c1ccc(OCC)cc1)SCC2
CCN(C)c1ccc(-c2cnc(N)nc2-c2ccccc2O)cc1
COc1cc2c(cc1OC)C1=NO[C@@H](CN3CCN(C/C=C/c4ccc(Cl)cc4)CC3)[C@@H]1CO2
O=C(Nc1nc(-c2ccc(OC(F)(F)F)cc2)cs1)c1ccc(Nc2ccncn2)cc1
O=C(O)c1ccc(/C=C/C(=O)N2CCC(N3CCCC3=O)CC2)cc1
Cc1nn(C)c2nc(NNC(=O)Nc3cc(Cl)nc(Cl)c3)cc(C(C)C)c12
CCN(CC)CCC[C@H](C)Nc1c(C)cnc2cccc(Br)c12
Fc1cccc(Cl)c1Cc1nnc(S)n1-c1ccc2c(c1)OCO2
O=C(NCCc1ccccc1Cl)c1ccc(NC2=N[C@H]3CS(=O)(=O)C[C@H]3S2)cc1
c1ccc(CN2CCN(c3nc4ccccc4n4cccc34)CC2)cc1
C[C@@H](C(=O)N1CCCC1)[C@H]1CC[C@@H](C[C@@H](C)n2cc(C#CCOc3ccc(C(F)(F)F)cc3)nn2)O1
O=C(NC[C@@H]1CCCC(F)(F)C1)c1csc2c1CCCC2
C[C@@H]1CN(C(=O)CCCN2CCOCC2)CC[C@@]1(O)C1CCC1
O=C(COc1ccc(-c2ccc(F)cc2)cc1)N[C@@H]1COc2nc([N+](=O)[O-])cn2C1
C[C@H]1CC[C@@H](C)N1[C@@H](C)C(=O)NCc1ccc(N2CCCC2)nc1
Cc1nc2cc(CNC(=O)NCC3(O)CCCCC3)ccc2n1C
Cc1c(/C=C2\SC(=O)N(Cc3ccccc3F)C2=O)c2ccccc2n1Cc1ccccc1F
CCc1cc(=O)oc2c(C)c(O[C@H](C)C(=O)N[C@@H](C(=O)O)C(C)C)ccc12
Cc1ccc(C(=O)NC2CC2)cc1-c1ccn2c(-c3ccncc3Cl)nnc2c1
Cn1ncc(/N=C/c2ccccc2O)c1C(=O)Nc1cccc(Cl)c1
Fc1ccc(C2=CSC3=NC4=C(CNC/C4=C\c4ccc(Cl)cc4)C(c4ccc(Cl)cc4)N23)cc1
CC12CN3CCN(CC(C3)/C1=N\N=C1/C3CN4CCN(C3)CC1(C)C4)C2
C[C@H](N)C(=O)NCCCO
CCC[C@H](C)NC(=O)[C@H]1CCCN([C@@H](C)C(=O)NC(=O)NC)C1
CCc1ccc2nc(N3CCC(C(=O)NCCC(C)C)CC3)sc2c1
O=C(Nc1cccc(Cl)c1)N1Cc2c(sc3c2CCCC3)-n2cccc2[C@H]1c1ccc(F)cc1
Cc1ccc(CNC2CCc3c([nH]c4ccc(C)cc34)C2)cc1
Cc1cccc(-c2ccc(CC3(C(N)=O)CCN(C(=O)C(C)(C)C)CC3)cc2)c1
CN1C(=O)[C@]2(N=C1N)c1cc(-c3cccnc3F)ccc1O[C@H]1CCOC[C@@H]12
CN1C(=O)c2cccc3cc(S(N)(=O)=O)cc(c23)C1=O
O=Cc1ccc2c(c1)CC1(Cc3ccccc3C1)C2
COc1cccc(N2C(=O)C[C@H](Sc3ccccn3)C2=O)c1
O=S(=O)(c1cccc2ncccc12)N1CCC(CCN2CCN(c3cccc(F)c3)CC2)CC1
C[C@H]1CC2=C(NC(=S)N[C@@H]2c2ccc3c(c2)OCO3)/C(=C/c2ccc3c(c2)OCO3)C1
CCCOc1ccc(/C=C2\SC(=S)N(NC(=O)c3ccc(Cl)cc3)C2=O)cc1OCC
Cc1ccsc1C(=O)N1CCC2(CC1)C[C@H](CC(=O)N1CCOCC1)CCO2
O=C(NC1CCCCC1)[C@@H](Cc1ccccc1)N(Cc1c(Cl)cccc1Cl)C(=O)COc1ccccc1Cl
Cc1ccc(CN2C(=O)N/C(=C/c3cc(C)n(-c4ccc(Cl)cc4Cl)c3C)C2=O)cc1
Cc1ccn2c(C(=O)NCc3ccccc3Cl)c(C)nc2c1
O=C(N[C@@H]1C[C@H]2CC[C@@H]1C2)c1cccc(S(=O)(=O)Nc2ccccc2)c1
Cc1ccc(S(=O)(=O)N2CCN(C(=O)CCOc3ccccc3C)CC2)cc1C
C[C@](O)(CCc1ccccc1)CNC(=O)CCSc1ccccc1
C/C(Cl)=C/Cn1c(N/N=C2/C(=O)N(C)c3ccc(C)cc32)nc2c1c(=O)[nH]c(=O)n2C
COc1ccc(-c2c(C(F)(F)F)oc3cc(OC(=O)c4cccnc4)ccc3c2=O)cc1OC
O=C(O)c1cnc2c(C3CC3)cnn2c1
Cc1nc(CN2C(=O)COc3cc(S(=O)(=O)NC4CCC(C)CC4)c(Cl)cc32)no1
CCn1nccc1/C=c1/sc2n(c1=O)[C@@H](c1cccs1)C(C(=O)Nc1ccccc1)=C(C)N=2
NN=c1cccc(C=Cc2ccccc2)cc1O
C[C@@]12CCC[C@@](C)(C(=O)O)[C@H]1CC(=O)[C@]13C[C@@H](CO)[C@H](CC[C@@H]21)C3
N#CC1=C(N)Oc2c(N)cc3nc4ccccc4nc3c2C12C(=O)N(Cc1cnnn1-c1ccccc1Cl)c1ccccc12
Fc1ccccc1Cc1nc(-c2nc(C(F)(F)F)n[nH]2)n2ccccc12
COc1ccc(O[C@H](C)C(=O)N[C@@H](C)c2ccc3c(c2)CCCC3)cc1
Cc1ccc(-c2nc(CN3c4cccc5cccc(c45)S3(=O)=O)co2)cc1
Fc1cnc(N2CCN(Cc3ccc(-c4cc[nH]n4)o3)CC2)nc1
COc1ccccc1OCC(=O)N1CCOC[C@@H]1c1nc(C)no1
Cc1occc1C(=O)N(Cc1ccco1)Cc1ccccc1O
CCOc1ccc(NC(=S)NC(=O)/C=C/c2ccco2)cc1
Cc1ccc2cc(C)c(NCCO)nc2c1
Cn1ccnc1COc1cnc(N2CCN(S(=O)(=O)C[C@@]3(C)NC(=O)NC3=O)CC2)nc1
CN(CC(=O)O)Cc1c[nH]c2cc3ncnc(Nc4cccc(Br)c4)c3cc12
CC(C)c1nc(NC[C@@H]2CCCN(S(C)(=O)=O)C2)c2cnn(C)c2n1
CCCCC/C=C\C/C=C\C/C=C\[C@H](C)/C=C\CCCC(=O)N[C@H](C)CO
C[C@H](COc1ccccc1F)NC(=O)[C@@H](C#N)C(C)(C)C
CCCCSc1ncc(C=O)cn1
CN(CCN1CC(=O)C(c2nc3ccccc3s2)=C1N)C1CCCCC1
COc1cc(Nc2ncccc2-c2n[nH]c(Nc3ccc4c(c3)OCO4)n2)cc(OC)c1
Cc1ccc(C)c(CN(c2ccc(F)c(F)c2)S(=O)(=O)c2cccn3cnnc23)c1
COCC/C(SC(=O)c1cccnc1)=C(\C)N(C=O)CCCCCCCCCCCCN(C=O)/C(C)=C(/CCOC)SC(=O)c1cccnc1
CC(C)C(O/N=C(\C(=O)NC1C(=O)N(S(=O)(=O)O)C12CCOCC2)c1csc(N)n1)c1cc(=O)c(O)cn1O
COc1cc(C(F)F)c(Cl)cc1-c1ncnc2cc(S(=O)(=O)Nc3nccs3)ccc12
CCN(CC)C(=O)C[C@@H](c1ccc(C)cc1)c1ccc(OC(C)C)cc1
Cc1ccc2[nH]c(-c3c(-c4ccccc4)nc4sc(C)nn34)nc2c1
NC(=S)NN=Cc1cc([N+](=O)[O-])ccc1O
CCc1ccc(/C=C2\SC(=S)N(c3cccc(C)c3)C2=O)cc1
COC[C@@H]1CCN(C(=O)CCCn2cccn2)C1
O=c1c(/C=N/c2cccc(Cl)c2)c(Nc2cccc(Cl)c2)nc2ccccn12
O=C1CC[C@@](c2ccccc2)(C2CCN(Cc3ccccc3)CC2)C(=O)N1
COc1ccc(N2C(=O)C(C)(C)C2c2ccc(F)cc2)cc1
O=C(CC1CCc2ccccc21)N1CCC(C(=O)O)(n2ccnc2)CC1
O=C1CC(c2ccccc2)N=C2CCCCN12
Cc1cccc(C)c1-c1cccc(COc2cn(CCC(=O)O)nn2)c1
CCCCc1ccc(NC(=O)Cn2nc(-c3ccccc3)oc2=O)cc1
O=c1nc(NC(=S)Nc2ccccc2)cc(O)[nH]1
Cn1c(=O)oc2cc(S(=O)(=O)Nc3ccccc3)ccc21
CC(=O)Nc1cccc(NC(=O)C(=O)NC[C@@H](c2ccc3c(c2)CCN3C)N2CCOCC2)c1
Cc1cccc([C@@H]2CC(c3cccs3)=NN2S(C)(=O)=O)c1
CCOc1ccc(S(=O)(=O)N2CCCCC2)cc1NC(=O)c1ccccc1
Cc1ccc(-c2onc(C)c2C)cc1S(=O)(=O)Nc1cccc(C(F)(F)F)c1
O=C(CC(O)c1ccccc1)NO
CCC(O)(C#CCC(C)C[C@@H](C)[C@@]1(C)CC[C@@H](/C=C/C=C2C[C@@H](O)C[C@H](O)C2)C1(C)C)CC
CCc1c(C)sc2c1CCN(C(=O)Nc1cc(C)ccc1OC)[C@H]2c1ccc(F)cc1
N#Cc1ccc(-c2csc(N/N=C\c3ccc4c(c3)OCO4)n2)cc1
C[C@@H]1[C@H]2C3=CC[C@@H]4[C@@]5(C)C[C@@H](O)[C@H](O)C(C)(C)[C@@H]5CC[C@@]4(C)[C@]3(C(=O)O)CC[C@@]2(C(=O)O)CC[C@H]1C
CC[C@@H](C)c1ccc(N2C(=O)N=C(O)/C(=C\c3cc(C)n(-c4c(C)cccc4C)c3C)C2=O)cc1
CN(Cc1ccc(C(F)(F)F)cc1)C(=O)[C@H]1O[C@@H](n2cnc3c(N)ncnc32)[C@H](O)[C@@H]1O
O=S(=O)(Nc1ccc(Cl)nn1)c1ccccc1
Cc1ccc(S(=O)(=O)NC(=O)Nc2ccccc2)cc1
CC(=O)OCC(=O)[C@@]12OC(C)(C)O[C@@H]1C[C@@H]1[C@@H]3CC=C4C[C@@H](OC(C)=O)CC[C@]4(C)[C@H]3CC[C@@]12C
CC[C@@]12CC/C=C\CC(Cc3ccc(OC)cc31)[C@@H]2N
CCOC(=O)NCCCC(=O)NCc1ccccc1
O=C1OCC(O)=C1c1cccc(Cl)c1
Cc1ccc(NC(=O)CSc2nc(C3CCCCC3)c(C#N)c(=O)[nH]2)cc1
Cc1ccc(NS(=O)(=O)c2c(C)nc3sc(C)c(C)n3c2=O)cc1F
CCC(C)CN[C@H](c1cc(C(F)(F)F)ccc1N1CCN(C(=O)CCc2ccc(Cl)cc2Cl)CC1)C(C)CC
[C-]#[N+]C1C(C)=NC2=C(C(=O)NC2)C1c1ccc2n[nH]c(C)c2c1
O=C(Cc1cnc2ccccn12)N[C@@H](Cc1ccccn1)[C@H]1C[C@@H](O)C1
CCN1CCC[C@@H]1[C@H]1CCCN1C(=O)C[C@H]1OCCc2sccc21
C=CCNCCCOc1ccc(C(C)(C)c2ccccc2)cc1
CN(C(=O)C1CCCN1S(=O)(=O)c1ccc(Cl)cc1)c1ccccc1
Cc1noc(C)c1S(=O)(=O)N1CC[C@@H](Cn2c(C)cnc2-c2ccccc2)C1
COc1c(B2OC(C)(C)C(C)(C)O2)ccnc1F
C=CCc1ccc(OCc2cn(-c3ccc(C(=O)c4ccccc4)cc3)nn2)c(O)c1
N#C[C@H](/C(=N\S(=O)(=O)c1cccs1)c1ccccc1)c1nc2ccccc2n1Cc1ccccc1
Cc1nc(C(=O)N(Cc2nccn2C)C2CC2)nn1-c1ccc(F)cc1
O=C(/C=C/c1ccc(O)c(O)c1)OCCc1ccc(F)cc1
CCOc1ccc(NC(=O)CN(C)S(=O)(=O)/C=C/c2ccccc2)cc1
O=C(NCc1cccnc1)NC[C@H]1CCC[C@H](OCc2cc(C(F)(F)F)cc(C(F)(F)F)c2)[C@@H]1c1ccccc1
COc1ncc(N(C(=O)c2cc(-c3cc4c(cc3C(=O)N3Cc5ccccc5C[C@H]3C)OCO4)n(C)c2C)c2ccc(O)cc2)cn1
COc1ccc(C2=C([N+](=O)[O-])/C(=C/N3CCOCC3)N=C2)cc1
CCN1CCC(CNc2ccc([N+](=O)[O-])cc2C#N)CC1
O=C(Cn1nc2c3ccccc3nc(C3CC3)n2c1=O)NC1CCCC1
CN(Cc1ccccc1)C(=O)c1ccc(NC(=O)Cc2ccc(NC(=O)C3CCCN(C(=O)C4CCC4)C3)cc2)cc1
COc1ccc(C(=O)N2CCC[C@@H](c3nc4ccccc4cc3N)C2)cc1Cn1cccn1
O=C(c1ccc(=O)[nH]c1)N(Cc1ccc(F)cc1F)C1CC1
Brc1ccc(NC2C3CC4CC(C3)CC2C4)cc1
CC(O)C(C)NCc1ccnc(-c2ccc(C(F)(F)F)nc2)n1
COc1ccc(N2C[C@@H](NS(=O)(=O)c3ccc(Cl)cc3)CC2=O)cc1
O=C(NCc1cnc(Oc2ccc3c(c2)CCC(c2cccc(F)c2)O3)s1)c1cccnc1
COC(=O)N[C@@H](Cc1ccccc1)C(=O)N[C@@H](Cc1ccc(NS(=O)(=O)O)cc1)c1csc(-c2cccs2)n1
Cc1cc(N2CCC(c3ccc(C(F)(F)F)cc3)CC2)cc(C)c1NC(=O)CC(C)(C)C
COCCNc1ncc(-c2ccc3c(c2)OCO3)c(-c2nccs2)n1
COc1cccc(Nc2ccnc(Cl)n2)c1
COc1ccc(C2CC(=O)C(=C/C=C(C)/C=C/C=C(C)/C=C/C3=C(C)CCCC3(C)C)C(=O)C2)cc1
Cc1cc(Cl)ccc1NC(=O)c1ccc(Cl)cc1C(=O)NC(C)C
Clc1ccc2c(c1)N1Cc3ccc(Cl)cc3N(C2)C1
COc1cc(Br)cc(-c2noc(C3CCCN(Cc4ccccc4)C3)n2)c1OC
O=C(NCC(O)COc1ccccc1)c1ccccc1O
CS(=O)(=O)C1(c2nc(-c3ccnc4[nH]ccc34)nc3c2OCC2COCCN32)CCOCC1
CCCc1noc(CCCC(=O)N2CCCC2c2cnn(C)c2)n1
CCOC(=O)C1=C(c2ccccc2)NC(=S)N[C@H]1c1ccc(OCc2ccc(C)cc2)cc1
Cn1c(SCC(=O)Nc2ccccc2)nnc1-c1ccc(NC(=O)CCc2ccccc2)cc1
CCOC(=O)c1ccc(C[C@H]2S/C(=N/N=C/c3ccc(Cl)cc3)NC2=O)cc1
C[C@@H](Sc1nnc([C@@H](C)N2CCCCC2)n1-c1ccc(F)cc1)C(=O)NCCC1=CCCCC1
COc1ccc(NC(=O)Cn2ncc3c(=O)oc4ccccc4c32)c(OC)c1
Cc1c(NC(=O)CN(C)Cc2cc(-c3ccccc3)n[nH]2)cnn1C
O=C(NCc1ccc(NC(=O)C2CC2)cc1)c1ccc2[nH]nnc2c1
NC(=O)COC(=O)c1c(Cl)nc2sccn12
CCOC(=O)C1=C(C)Nc2nc(SC)nn2[C@@H]1c1ccccc1Cl
Fc1cccc(-c2nc(CN3CCC(Cc4ccccc4)CC3)co2)c1
C=Cc1nc(C#N)c(N)o1
NC(=O)c1cc(-c2ccc(Oc3ccc(F)cc3)cc2)cc(N(CC(=O)O)c2ccccc2)n1
CCOc1cc(C=Nn2c(-c3cc4cc(Cl)ccc4o3)nc3ccccc3c2=O)cc(Cl)c1OCc1ccc(F)cc1
O=C(NCCO)c1nnc2n(c1=O)CCN2c1ccccc1
Cc1ccc(S(=O)(=O)c2nnn3c2nc(NCCC(C)C)c2sccc23)cc1C
C=CC(=O)NCCSc1nc(-c2ccc(F)c(C(F)(F)F)c2)c(-c2ccnc(Nc3ccccc3)c2)[nH]1
Cc1nn(-c2ncccn2)c2c1[C@H](c1ccc(F)cc1Cl)CC(O)=N2
c1cc2c(C3(c4c[nH]c5cc(C6=NCCN6)ccc45)CCCCC3)c[nH]c2cc1C1=NCCN1
O=C1NC(=S)N(c2ccc(Cl)cc2)C(=O)/C1=C\Nc1cccc(Cl)c1
CC(C)N(CCOc1ccccc1F)CCS(C)(=O)=O
c1cncc(Nc2csc3ccccc23)c1
CC[C@@H](C(=O)NCC(C)C)N(Cc1ccc(Cl)cc1)C(=O)CCCN1C(=O)c2ccccc2C1=O
CN(C)C[C@H]1CCC/C(=C/c2ccc(Cl)cc2)C1=O
O=S(=O)(N=S(N1CCCCC1)N1CCCCC1)c1ccccc1
CCC(=O)N(c1ccccc1)[C@@H]1CCN(CCc2ccccc2)C[C@H]1C
CCOc1ccc(OCC)c(NC(=O)Nc2cnc(C#N)cn2)c1
O=C(Nc1ccc([N+](=O)[O-])cc1)c1cccc(N2C(=O)[C@@H]3[C@H]4C=C[C@@H]([C@@H]5C[C@@H]45)[C@H]3C2=O)c1
CN1CCN(CCn2c(=S)[nH]c3ccccc3c2=O)CC1
N#Cc1ccc(S(=O)(=O)NC(=O)C2CC2)c(C(F)(F)F)c1
O=C(CC1(C(=O)O)CCCC1)Nc1ccc2c(c1)NC(=O)CO2
C[C@H](NC(=O)CNc1cc(C(F)(F)F)c2c(-c3ccccc3)nn(C)c2n1)c1ccccc1
O=c1cc(CNc2ccc(F)cc2)c2cc(Cl)ccc2o1
C[C@H]1CN(C)[C@H](C)C/C1=N/Oc1ccc([N+](=O)[O-])cc1
COc1ccc(C(=O)NCCS(=O)(=O)N2CCN(Cc3ccccc3)CC2)cc1
COc1cc([C@@H]2[C@H](C(=O)OCC(C)C)C(=O)C[C@](C)(O)[C@@H]2C(=O)OCC(C)C)ccc1O
O=C(COc1ccc(Cl)cc1Cl)Oc1ccc(CC2NC(=S)NC2=O)cc1
O=C(/C=C/c1ccc(Cl)cc1Cl)c1cccc(NC(=O)c2cc(-c3ccncc3)n[nH]2)c1
FC(F)(F)C(F)(F)Oc1ccc(OC(F)(F)C(F)(F)F)cc1
CC1CN(c2c(F)cc3c(=O)c(C(=O)O)cn(C4CC4)c3c2F)CCN1
O=C(c1cc(F)ccc1-n1nccn1)C1CC[C@H]2CN(c3cnnc(Cl)c3)[C@H]2C1
C[C@H](CCC1CC1)/N=C(/O)c1ccnc(O)c1
O=S1(=O)C[C@@H]2NC(=S)N(c3ccc4ncccc4c3)[C@H]2C1
COc1ccc(C)nc1NC(=O)[C@@H]1CC1(Cl)Cl
COc1ccc2nc(SC)c3c(C)ncn3c2n1
Cc1c(C(=O)NN(CC(C)C)c2nc(C#N)ncc2Br)noc1-c1ccccc1
CN1CCN(c2cc3nccc(-c4cccc(NC(=O)c5cccc(C(F)(F)F)c5)c4)n3n2)CC1
C[C@H](Nc1nc(-c2cccs2)nc2ccccc12)c1ccco1
Cc1c(CN2CCN(C)CC2)cc(-c2ccc(F)cc2)n1-c1ccccc1Cl
CCCCc1c(C#N)c(O)n2c(=N)c(C#N)cnc2c1SC
O=C(O)c1ccc2c(=O)cc(-c3cccc(/C=C/c4ccc5ccccc5n4)c3)oc2c1
COC(=O)[C@@H]1C(=O)C[C@](C)(O)[C@H](C(=O)OC)[C@@H]1c1cccc(OC)c1
FC(F)(F)COc1nccc2[nH]nc(-c3ccnc(N4CCOCC4)c3)c12
CC[C@H]1c2cccn2CCN1S(=O)(=O)c1ccc2c(c1)OCO2
O=C(C1CN(S(=O)(=O)c2cccnc2)C1)N1CCN(c2ccncc2)CC1
O=S(=O)(NCCCc1ccccc1)c1ccc2nc(O)ccc2c1
CCCN1C(=S)N[C@H](c2ccccn2)[C@H]1c1ccc(C)[nH]1
CCc1ccc(NC(=O)[C@@H]2CN(S(C)(=O)=O)c3cc(C)ccc3O2)cc1
OC[C@H]1O[C@@H](n2c3ccc(Cl)cc3c3c(-c4ccoc4)ncnc32)[C@H](O)[C@@H]1O
NC(=O)c1ccc(NCCN2C(=O)c3ccc(C(=O)O)cc3C2=O)c([N+](=O)[O-])c1
FC(F)Oc1ccc(Nc2cc(C3CC3)[nH]c(=NC3CCCCC3)n2)cc1
Cc1cn2cc(C#N)cc2cc1Nc1ccnc(Nc2ccc(C#N)cc2)n1
COC(=O)N1CCc2c(nc(-n3c(CN)cc4ccccc43)nc2NCc2ccccc2)C1
COc1cc(N2CCC[C@@H](c3nnc(CN4CCCCC4)n3C)C2)ncn1
CCc1c(O)nc(S)n(-c2ccc(F)cc2)c1=O
CCOc1ccc(Nc2c3c(nc4ncnn24)CCC3)cc1
N#Cc1nc(-c2ccccc2)oc1S(=O)(=O)c1ccc(Br)cc1
C=C(CC)C(=O)c1ccc(OCC(=O)NCO[N+](=O)[O-])c(Cl)c1Cl
CC1(C)C[C@H](c2nc(COc3ccc(F)cc3)nn2CCCO)CCO1
O=C1c2ccc(Nc3ccc(F)cc3F)cc2CCc2cc(OCCO)ccc21
O=C(CCCCCCC(=O)Nc1ccc2ccnc(Nc3ccc4ccccc4c3)c2c1)NO
CCCN(CC1CC1)c1cc(C(C)c2c(OC)cc(OC)cc2OC)nc(C)n1
Cc1ccc2cc(/C=C\C#Cc3ccccc3)ccc2c1
CC(=O)N1CCC([C@H](NC(=O)c2ccccc2C)C(=O)N[C@H](C)C(C)C)CC1
CO[C@H]1C[C@H](Oc2cc(F)c(F)c(-c3cc(F)c(OCCCCC(=O)O)c(F)c3)c2)C1
C[C@@](O)(CCCO)CNC(=O)c1ccc(-c2ccncc2)cc1
Cc1cc(C)c2cc(C(=O)NC(C)C)[nH]c2c1
CCCOc1ccc([C@](O)(CCc2ccccc2)[C@@H](CN2CCCCC2)c2ccccc2)cc1
CC(C)C[C@@H]1C[C@H](NC(=O)c2cc3cccc(F)c3o2)CCO1
C[S+]([O-])COc1ccc(N2CCN(CCn3ncc4c3nc(N)n3nc(-c5ccco5)nc43)CC2)cc1
O=C(NCc1cccs1)N1CCCC[C@@H](c2ccc(Cl)cc2)C1
CN(C)c1ccc(CNc2ccc3c(c2)ncn3C(C)(C)C)cc1
Clc1cccc(/C=N/n2cnnc2)c1
COc1ccc(-c2noc(CCC(=O)Nc3ccc(C)cc3)n2)cc1OC
C[C@H]1COCC[C@H]1Nc1cccc(OCC(=O)N(C)C)c1
N#Cc1cccc(S(=O)(=O)NC(=O)COC2CCCC2)c1
C[C@@H]1C[C@H](OC[C@@H](S)CN2CCN(c3ccccn3)CC2)CC(C)(C)C1
CCCCN(CC)C(=O)c1cc2cc3ccc(OC)cc3nc2o1
CCn1c(COc2ccccc2C)nnc1SCC(=O)Nc1ccc(Br)cc1
CCN(c1ccc(OC)cc1)S(=O)(=O)c1nnc(NC(=O)COc2ccc(C)cc2)s1
CCOC(=O)CC(Nc1nc(N2CCOCC2)nc(N2CCOCC2)n1)c1ccccc1Cl
CCO/N=C(/C/C=N/OCC)c1ccc(CC)cc1
COc1ccc(-c2cc(-c3cccs3)c(C#N)c(SCC(=O)NCc3ccccc3)n2)cc1
CCN(C(=O)c1ccccc1S(=O)(=O)N1CCCCC1)c1nc2ccccc2s1
Cc1ccc(-n2nc(-c3ccccc3)c3c2N(CC(=O)NC2CC2)C(=O)CS[C@H]3c2ccccc2F)c(C)c1
O=c1[nH]c(=O)n2n1C1C=CC2CC1
O=C(CCc1ccc(S(=O)(=O)N2CCCC2)cc1)N1CCN(CC(=O)N2CCCC2)CC1
CN(Cc1ccccc1)C1COC2(CCN(Cc3nccs3)CC2)C1
Cc1cc(NC(=O)CSc2nc3ccccc3c(=O)n2-c2ccccc2)ccc1Cl
CSc1ccc(CN2CCOc3ccc(CN4CCCCC4CO)cc3C2)cc1
CN(C)Cc1ccc(/C=C/c2n[nH]c3cc([C@@H]4C[C@@]45C(=O)Nc4ccc(F)cc45)ccc23)cc1
CCOc1ccc(C2(C34CC5CC(CC(C5)C3)C4)N=C(N)N(C)C2=O)cc1
CCOC(=O)c1ccc(-c2nc3ccccc3[nH]2)nc1
CCOC(=O)C1=C(C)N(c2ccc(C)cc2)C(=O)/C1=C\c1ccc(Cl)cc1Cl
CS(=O)(=O)CC(=O)N1C[C@H]2CCC[C@@]2(COCc2ccncc2)C1
Cc1cc(Cl)c(OCCCN2C[C@@H](C)C[C@@H](C)C2)c(Br)c1
c1cc2c3cnc(Nc4ccc(N5CCNCC5)cn4)nc3n(C3CCCCC3)c2cn1
CN1c2ccncc2Sc2ccncc21
COc1cccc(C23CN(C)CC2CC32OCC(C)(C)CO2)c1
Cc1ccc(CN(C(=O)c2ccnn2C)C2CCCC2)cc1
O=C(O[C@@H]1CCOC1=O)C1CCN(C(=O)Nc2ccccc2)CC1
Clc1ccc2c(c1)Oc1cc(Cl)ccc1O2
COc1nc(Nc2ccc(OC(F)(F)F)cc2)cc(Nc2nccn2-c2cccc(C(F)(F)F)c2)n1
CNc1nc(N)c([N+](=O)[O-])c(Nc2ccc(F)cc2)n1
CC(C)(C)C(=O)Oc1cc(C(C)(C)C)ccc1C/N=C(\S)NCc1ccc(NS(C)(=O)=O)cc1
Cc1cc2cc(CNc3cccc(Cl)c3Cl)c(=O)[nH]c2cc1C
O=C1CC[C@H](C(=O)N2CCOCC2)CN1CCc1ccc(Cl)cc1
FC1CN=C(c2ccc3cc(-c4ccc(-c5cc6ccc(C7=NCC(F)CN7)cc6[nH]5)cc4)[nH]c3c2)NC1
Cc1cc2nc3s/c(=C\c4ccc(O[C@H](C)C(=O)O)cc4)c(=O)n3c2cc1C
CC(C)Cn1c(=O)[nH]c(=O)c2c(C(F)(F)F)cc(-c3ccccc3)nc21
CCOC(=O)C1=C(CN2CCOCC2C(=O)OC)NC(c2nccs2)=NC1c1ccc(F)cc1Br
COc1cccc(Cn2[nH]c(-c3ccc([N+](=O)[O-])cc3)c(Cc3ccc4c(c3)OCO4)c2=O)c1
O=C1N[C@@H]2CN[C@H]1C2
COc1ccc(NC(=O)[C@H]2CC(=O)N(c3ccccc3Cl)C2)c(C(F)(F)F)n1
O=C(CSc1nnc(NC(=O)C2CCC2)s1)NC1CC1
CC(C)(C)OC(=O)N1CCC[C@H]1COc1ccccc1N
COc1cc(Cl)ccc1CCC(=O)Nc1ccc2nc(C)cc(N)c2c1
CN1C(=O)/C(=C2\Nc3ccccc3\C2=N/OCCN2CCNCC2)c2cccc(Br)c21
Cc1nc(CO[C@H]2CN(C(=O)c3cccn3C)[C@@H]3COC[C@@H]32)cs1
CCOC(=O)/C=C(/C(=O)OCC)n1c(=O)c(C)cn(C2CC(N=[N+]=[N-])C(CO)O2)c1=O
O=c1nc(NC2CCCCO2)ccn1CCO
CC(C)(C)NC(=O)CSc1cccc2cccnc12
O=C1S[C@@H](Cc2ccc(F)cc2)C(=O)N1c1ccccc1
CC1CCN(CCC(=O)N2CCOC[C@@H]2c2ccn[nH]2)CC1
O=C(Nc1ccc(Cl)s1)c1cnc(N2CC(F)(F)C2)c(OCC2CC2)n1
CCn1cnnc1CCN1C[C@@](C)(c2ccccc2)CCC1=O
O=C(c1cn(C2CCCC2)cc(C(=O)N2CCC[C@@H](c3ccccc3)C2)c1=O)N1CCCCC1
Oc1ccccc1N1CCN(c2nc3ccccc3s2)CC1
Cn1cc[n+](COC2CCCCCCC2)c1/C=N/O
CCc1ccc(OCC(=O)N(Cc2ccc(Cl)cc2)[C@H](Cc2ccccc2)C(=O)N[C@@H](C)CC)cc1
Cc1c(Cl)cc(C(=O)N2CCC[C@H](CN3CCOCC3)C2)cc1Cl
Brc1ccc(-c2nnc(SCCC3OCCCO3)o2)cc1
CC(C)(C)c1cc(C(=O)O)c(NC(=O)Nc2ccc3[nH]ncc3c2)s1
CCOc1ccc(Nc2cc(-c3cccnc3)[nH]c(=NC3CCCCC3)n2)cc1
Cc1sc2nc1C(=O)N[C@@H]([C@H](O)c1ccccc1)c1nc(cs1)C(=O)N[C@@H](Cc1ccc(O)cc1)C(=O)N1C[C@H](O)[C@H](C)[C@H]1c1nc(cs1)-c1nc(cs1)-c1nc(-c3nc(C(N)=O)cs3)ccc1-c1nc(cs1)C(=O)N[C@H]2CC(N)=O
S=c1[nH]ccn1Cc1ccc(Cl)cc1Cl
O=[N+]([O-])c1cc(Cl)ccc1CNc1ncnc2c1ncn2[C@@H]1O[C@H](CO)[C@@H](O)[C@H]1O
O=C(Nc1ccc2oc(-c3cc(Cl)ccc3Cl)nc2c1)c1ccc([N+](=O)[O-])o1
CNC(=O)c1ccc(NC(=O)c2[nH]c(C)c(C(=O)OC)c2C)cc1
CCOC(=O)CNC(=O)C(NC(=O)c1ccc(/C=C/C(=O)O)cc1)c1ccccc1
COC(=O)CC1C(Cc2ccccc2)CC2CCC1N2C
COC(=O)[C@H](Cc1c[nH]c(-c2ccc(OC)cc2)n1)NC(=O)[C@H](Cc1c[nH]c2ccccc12)NC(=O)OC(C)(C)C
CO[C@H]1CC(C)(C)c2ccccc2[C@H]1Nc1cc(O[C@H]2C[C@H](O)[C@H](COS(N)(=O)=O)C2)ncn1
NC(=O)c1ccc(NC(=O)c2ccc(CN3CCC(Cc4ccccc4)CC3)cc2)cc1
COc1ccc(CCC(=O)NCCN(C)C)cc1OC
COc1ccc(Br)cc1CN(C)C(=O)Cn1c(=O)cnc2ccccc21
COC(=O)c1ccc(CNC(=O)COC(=O)c2ccccc2-c2ccccc2)cc1
Cc1oc(-c2cccc(NS(=O)(=O)C(C)C)c2)nc1CNC(=O)[C@H]1COc2ccccc2C1
COc1ccccc1N(C)S(=O)(=O)c1ccc(Cl)c(C(=O)Nc2cccc(C)n2)c1
Cc1ccc2[nH]c(/C(C#N)=C\c3ccc([N+](=O)[O-])o3)nc2c1
Cc1nc2ccccc2n1C[C@H](O)Cn1c2ccccc2c2ccccc21
CN(Cc1ccccc1)C(=O)Cn1sc2ccccc2c1=O
Cn1cc([C@@H]2C[C@@H]2C(=O)N(Cc2ccccc2)c2ccc(Cl)cc2)cn1
O=C(Nc1ccc(Cl)cc1)N1CCCN(C(=O)c2ccc[nH]2)CC1
COc1cc(COCC2CCN(Cc3ccc(F)c(F)c3)CC2)cc(OC)c1
CCCOc1ccc(-c2nc3ccc(C4=NNC(=O)CC4CC)cc3o2)cc1
O=C(O)C[C@H]1c2ccccc2S(=O)(=O)N1C1CCCC1
COc1ccc(Cn2nnnc2C(CC(C)C)N2CCC(C(N)=O)CC2)cc1
COC[C@@H](C(=O)OC)N1CCC(OCc2ccccc2F)CC1
O=C(NCc1ccc(Cl)cc1)c1cn2c(CN3CCOCC3)cc3cc(CN4CCOCC4)cc(c1=O)c32
Cc1cc(C(F)(F)F)nc(CCNC(=O)C2CCC(=O)N(Cc3cccc(F)c3)C2)n1
CC1=NN=C(N)N/C1=C\C(Sc1ccc(Cl)cc1)c1ccc(Cl)cc1Cl
COC(=O)Nc1ccc(S(=O)(=O)N2CCC(C(=O)N3CCCC(C)C3)CC2)cc1
N=C(N)Nc1cccc(C(=O)Nc2ccc(SC(CC(=O)O)c3cccnc3)cc2)c1
COC(=O)/C=C\[C@@H]1[C@H](C)N1S(=O)(=O)c1ccc(C)cc1
Oc1cccc(-c2cc(-c3cccc(Cl)c3)cc(-c3cccc(O)c3)n2)c1
C=CCn1c(C)nnc1S[C@H](C)C(=O)N1CCc2sccc2C1
C[C@]1(CNC(=O)Nc2ccc(-c3csnn3)cc2)CCCS1
COc1ccc(/C=C(\NC(=O)c2cccs2)C(=O)Nc2cccc(C(F)(F)F)c2)cc1OC
COc1ccc([C@@H](N[C@H]2CCNC2=O)c2ccccc2Cl)cc1
Cc1cnn(S(=O)(=O)c2ccc3ccccc3c2)c1
Cc1ccnc(-n2nc(C3CC3)nc2CCn2cccc2)c1
CCOC(=O)C1=C(C)N=C2SC(C)C(=O)N2C1/C=C/c1ccccc1OC
CC1C2Cc3ccc(O)cc3C1(c1ccccc1)CCN2CC1CCC1
COCCC(=O)N1CCN(C)c2ncccc2C1
CCN1CCN([C@H](C)CNS(=O)(=O)c2ccc(OC)c3ccccc23)CC1
CC1=C(C(=O)Nc2ccc(Br)cn2)[C@@H](c2ccccc2C(F)(F)F)C2=C(CCCC2=O)N1
C[C@H](NC(=O)c1ccccc1)C(=O)OCC(=O)Nc1ccc(Cl)cn1
Cc1cccc(C(=O)N2[C@@H]3CN(C(=O)OC(C)(C)C)[C@@H]4CCC[C@H]2[C@]4(C)C3)n1
Cc1cc(C(=O)CSc2nnc(-c3cccs3)o2)c(C)n1C[C@H]1COc2ccccc2O1
COc1cccc(NC(=S)Nc2ccc3c(C)cc(=O)oc3c2)c1
CN1CCN(c2cc(Br)nc3c2NCCC3)CC1
Clc1ccc(CSc2nc3ccccc3c3nc4ccccc4n23)cc1
CCCCCCCCCCCCCCNC(=O)/C=C\C(=O)O
O=C(Cn1cncn1)Nc1cc(-n2ccc3ccccc32)ncn1
Cc1ccc(C(=O)NCc2ccc(C(=O)O)cc2)cc1C
c1ccc(CCCNCC2CCCN(CCOC(c3ccccc3)c3ccccc3)C2)cc1
Clc1ccc(COc2ccc3ccccc3c2CNc2ccc(Br)cc2)cc1
CC[C@H](C(=O)NC)N(Cc1ccc(Cl)cc1Cl)C(=O)CN(c1cccc(Cl)c1)S(C)(=O)=O
Cc1nc(SCC(=O)NC(=O)NCCC(C)C)c2ccccc2n1
CC(=O)N1C[C@@H](c2ccccc2)[C@H]2[C@H]1CCCCCN2C(=O)Cc1nonc1N
COC(=O)C1=CNC=C(C(=O)OC)C1c1ccc(F)c(F)c1
Nc1nc(Cl)cc(NCC2CC(O)(CO)C2)n1
O=C(Nc1ccccn1)c1cncc2nnc(-c3ccc(OC(F)F)cc3)n12
O=C(Cc1cccnc1)N1CCC[C@H]1c1n[nH]cc1-c1cccc(Cl)c1
Fc1ccc2c(c1)CC[C@@H]1CNCCCN21
N#Cc1cccc(C(=O)Nc2cccc(Oc3cncnc3)n2)c1
COc1ccc(CNc2nnc(C(C)C)o2)cc1[N+](=O)[O-]
CC(C)(C)OC(=O)NCCc1nnc(S(=O)(=O)Cc2ccc(Cl)cc2)o1
CC(=O)Nc1ccc(C(=O)COC(=O)c2cc3c(s2)CCC3)cc1
O=Cc1ccc(OCC(=O)Nc2ccc(F)cc2)c(Cl)c1
COc1ccc(-n2c(=O)c3c4c(sc3n3c(SCC(=O)c5ccccc5)nnc23)CO[C@@H](C(C)C)C4)cc1
Cc1noc(C)c1S(=O)(=O)N1CCCC(C(=O)Nc2ccc(C(C)C)cc2)C1
C=CC(=O)Nc1cccc(NC(=O)Nc2nc(Nc3ccc(N4CCC(N5CCOCC5)CC4)cc3OC)ncc2C(F)(F)F)c1
Cc1ccc(C(=O)NC(C)(CO)CO)cc1
CCCCn1c(=O)c2nc[nH]c2n(CCCC)c1=O
CCCCCCCCCCCCCc1cc2nc3ccc(N(C)C)cc3sc-2cc1=[N+](C)C
CCc1ccc(OCCNC(=O)c2ccc(CN(c3cccc4ccccc34)S(C)(=O)=O)cc2)cc1
O=C1NC(=O)N(c2ccc(F)cc2)C(=O)/C1=C/c1ccc(O)c(O)c1
O=C1CCc2cc(Nc3cccc(O)c3)ccc2N1
COc1cc(/C=C2\SC(=O)N(CC(=O)Nc3cccc(C)c3)C2=O)ccc1OC(C)C(=O)O
O=c1[nH]ncc2cc(Br)cnc12
CC(C)COc1ncnc2[nH]cc(/C=C/C(=O)NC3CC3)c12
O=C(Nc1cccc(Cl)c1)N[C@H](Cc1c[nH]c2ccccc12)C(=O)O
COc1ccc(C)cc1[C@H](C)NC(=O)NCCCNS(C)(=O)=O
CCc1cccc(C)c1NC(=O)CSc1nc2ccc(N3C(=O)c4ccccc4C3=O)cc2s1
CCOC(=O)c1cc(-c2ccccc2)nn1Cc1cc(CC)no1
CC1(C)COC(C)(C(Cl)Cl)OC1
CN(C)c1ccc2c(-c3ccc(C(=O)NCc4ccc(COc5ccc(Cc6cc([C@@H]7O[C@H](CO)[C@@H](O)[C@H](O)[C@H]7O)ccc6Cl)cc5)cc4)cc3C(=O)[O-])c3ccc(=[N+](C)C)cc-3oc2c1
CCOc1cccc(CNCCO)c1OCc1ccc(Cl)cc1Cl
CN1CCN(C2CCN(C(=O)CC3CCC4(CC3)OOC3(OO4)C4CC5CC(C4)CC3C5)CC2)CC1
C=CCN1C(=O)C(O)(CC(=O)c2c(C)n[nH]c2C)c2cc(Br)ccc21
c1ccc(CNC2=NCCS2)cc1
C[C@@H](NC(=O)COc1ccc(C(N)=O)cc1)C(=O)NCC(F)(F)F
CS(=O)(=O)CCn1ccc(NC(=O)c2c(F)cccc2F)n1
C/C(=N/NC(=S)N1CCC(Cc2ccccc2)CC1)c1ccccn1
c1ccc(-c2cn3ccnc3nc2-c2ccc(CN3CCC(c4cnc5ccccc5n4)CC3)cc2)cc1
Cc1ccsc1CNC(=O)N1CCCC[C@@H]1CCc1ccc(O)cc1
Cc1[nH]c2ccccc2c1CN1CCN(c2ccccn2)CC1
CCN(CC)CCCC(C)Nc1ccnc2cc(Cl)ccc12
CC1=CC(=C(C#N)c2nc3ccccc3s2)C=C(C)N1c1ccc(F)cc1F
Cc1ncc(Cn2nnc(C(=O)N/N=C/c3cccc(O)c3)c2C)c(N)n1
COc1c2c(cc3c1c(=O)c1cc4ccccc4nc1n3C)OC(C)(C)[C@H]1OC(=O)O[C@@H]21
COc1ccc(-n2nc3ccc(NC(=O)c4ccc(OC)c(Br)c4)cc3n2)cc1
C[C@H](NC(=O)c1ccccc1F)c1ccc(Br)cc1
COc1ccc(NC(=O)CSc2nc3ccc(N4CCN(C)CC4)nc3[nH]2)cc1OC
Cc1c(Cc2ccccc2)nnc(N2CCN(C(=O)Nc3ccccc3)CC2)c1C
COc1ccc(OC[C@H](C)NC(=O)[C@@H](C)Sc2ccc(OC)c(OC)c2)cc1
CCC(CC)C(=O)Nc1ccc(OC)c(NC(=O)c2ccccc2)c1
Cc1cc(Cl)ccc1Nc1nc(C(F)(F)F)ccc1C(=O)N/N=C/c1ccc([N+](=O)[O-])cc1
Cc1ccc(/C=C\CC(=O)N2CCS(=O)(=O)C[C@H]2C)cc1
COc1cccc2c1OC[C@@H](NS(=O)(=O)c1ccc(-c3cc(C)no3)o1)C2
COc1cc(N)c(Cl)cc1C(=O)OCCN1CCC(NC(=O)CCNC(=O)C2CCN(CCOC(=O)c3cc(Cl)c(N)cc3OC)CC2)CC1
OCc1cncc(Br)c1
CC(C)N(C(=O)c1ccc(C(=O)NC[C@@H](C)NC(=O)c2ccc(C(=O)N(C(C)C)C(C)C)cc2)cc1)C(C)C
Cc1nn(C)c2c(=O)n(Cc3ccccc3F)nnc12
COc1ccc(-c2c/c(=N\CCc3ccccc3)c3cc(C)ccc3o2)cc1OC
Cc1ccc(C2(C(=O)Nc3cc(C)c(OC(C)C)c(C)c3)CCOCC2)cc1
CC(C)N1CCN(C(=O)[C@@H]2N(C(C)C)C(=O)C23CCCCC3)CC1
CCCN(CCOC)c1nc(C)nc2c1c(C)nn2-c1ccc(OC)cc1OC
O=C(NCCO)C1CC1
CC[C@@H](c1nnc(SCC(=O)Nc2cc(C)nn2-c2ccc(C)cc2)n1Cc1ccccc1)N(C)C
Cc1ccccc1COC1CN(C(=O)[C@@H](C)n2ccnc2C(C)C)C1
COc1cccc(/C=N\Nc2nncc(-c3ccccc3)n2)c1
CC1(C)Oc2ccccc2[C@@H]2O[C@](C)(C#N)CC[C@@H]21
Cc1ccc(S(=O)(=O)OCC2[C@H]3CC[C@H]2C3)cc1
CCCC[C@@]1(OC(=O)CCC(=O)O)CC[C@]2(CC[C@H](C)[C@@H](C/C=C(C)/C=C/[C@H](O)[C@@H](C)/C=C/C(=O)OC)O2)O[C@H]1/C=C/C=C/C(=O)O
Clc1cnc(Oc2ccc(Oc3ncc(Cl)cc3Cl)cc2)c(Cl)c1
CCCn1nnnc1NCc1ccc(N2CCCC2)cc1
C(=N/c1ccc2c(c1)OCCO2)\c1ccc(OCc2ccccc2)cc1
CCCCCCn1nc(-c2ccc(F)cc2)c2c1CCNC2
COc1ccc(NC(=O)c2ccccc2NC(=O)c2ccc(N3CCCN(C)CC3)cc2)cc1Cl
Cc1cccc(NC(=O)c2ccccc2OCC(=O)Nc2cccc([N+](=O)[O-])c2)c1C
COCCCN1CCN(C(=O)c2ccc(CO)cc2)C[C@H](O)C1
O=C(NC1CCCCC1)[C@@H](c1ccccc1)N(C(=O)Cc1ccsc1)c1cccc(C(F)(F)F)c1
CC(C)(C)OC(=O)N1CCC(C(=O)N2CCN(C(=O)[C@@H]3COc4ccccc4O3)CC2)CC1
C[C@@H](C1CC1)N(C(=O)CSc1ncnc2nc[nH]c12)C1CC1
COC(=O)[C@]12CCCCC=C1N(Cc1ccccc1)C(=O)[C@H](CC(=O)N1CCN(C(=O)c3ccco3)CC1)C2
Cn1nc([N+](=O)[O-])nc1Oc1ccccc1C(=O)N1CCOCC1
CC(C)c1nc(N2CCN(C(=O)Nc3ccccc3)CC2)c(C#N)c2c1COC(C)(C)C2
CCc1ccccc1NC(=S)N(Cc1ccc2c(c1)OCO2)Cc1cc2cc3c(cc2[nH]c1=O)OCCO3
O=C(CCc1cccnc1)NCc1nnc2n1CCN(C(=O)/C=C/c1cc(F)ccc1F)CC2
CC(C)Oc1ccccc1C1C(C(=O)C2CCCC2)C(=O)C(=O)N1c1ccc(-c2ccon2)cc1
Cc1cc(C)c(NC(=O)CSc2nc3ccccc3c(=O)n2CCCN2CCOCC2)c(C)c1
CC(C)(C)OC(=O)N1N=CCC1c1ccccc1
O=C(c1ccccc1F)N1CCC[C@@H](c2nccn2Cc2cscn2)C1
Cn1cc(NC(=O)C(=O)N[C@H](CCc2ccccc2)c2ccccc2)ccc1=O
CSc1nc2ccccc2n1CC(=O)Nc1ccccc1
COc1cc(=O)n2c(c1C(=O)N1CCCC[C@@H]1C)CCC2
CCC[C@]1(c2ccccc2)NC(=O)N(CC(=O)Nc2sc3c(c2C(=O)OCC)CCCC3)C1=O
COc1cccc2c1ncc1c(=O)n(-c3ccc(Cl)cc3)c(=O)n(C3CCC(C)CC3)c12
CCCCCCCCCCCCCCCC(=O)O[C@@H]1[C@@H](O)C=C2CCN3Cc4cc5c(cc4[C@H]1[C@@H]23)OCO5
Cc1ccccc1NC[C@H](O)CN1c2ccccc2Sc2ccccc21
COc1ccc(F)c(-c2nc(C(=O)N[C@@H](CC(=O)O)c3ccc(C)cc3)ccc2OC)c1
Cc1cc(C)cc(NS(=O)(=O)c2ccc3nc(O)ccc3c2)c1
Cc1nc(CNC(=O)N2CCC[C@H](Cc3nc4ccccc4[nH]3)C2)no1
CCN(CC)CCCC(C)Nc1c([N+](=O)[O-])cnc2cc(Cl)ccc12
Cn1ccnc1N1CCN(c2cccc(F)c2C#N)CC1
Oc1ccc(/C=N/Nc2ccccn2)cc1O
C[C@H](NC(=O)c1cc2cc(Cl)ccc2n1C)C(=O)N[C@@H](Cc1ccccc1)C(=O)O
C[C@@H](CNC(=O)Nc1cnn(C)c1)Oc1cccc(Cl)c1
CC(C)(C)C(=O)C[C@@]1(O)C(=O)N(Cc2ccccc2)c2ccc(Br)cc21
Nc1ncc(C2CC2)nc1CNC(=S)Nc1ccccc1
CSc1ccc(CC(=O)N[C@@H]2CCOC[C@H]2OCC(=O)N(C)C)cc1
COC(=O)CCN1C[C@@H](OCc2ccncc2)CN(C(=O)CSC)CC1=O
CC(C)(C)c1ccc(C(=O)Nc2cccc(Nc3ccc4c(c3)CCc3ccccc3C4=O)c2)cc1
COc1cc(=O)n2c(c1C(=O)N(C)[C@@H](C)c1ccco1)CCN(C(=O)c1c(F)cccc1F)CC2
CC[C@@H](C(=O)NCC(C)C)N(Cc1ccc(C)cc1)C(=O)Cc1c(F)cccc1Cl
Cc1cc(C)n(-c2nc(N3CCCC(O)C3)c3c4c(sc3n2)CCCC4)n1
CCCNS(=O)(=O)Cc1noc2ccccc12
N#Cc1cnc2c(Cl)cc(NCc3cn(Cc4cccnc4)nn3)cc2c1Nc1ccc(F)c(Cl)c1
COc1c(C)cc(C)cc1CN1CC[C@H]1C(=O)O
CCOc1cc([C@@H]2C[C@@H](c3cccc(C)c3)Nc3nc4ccccc4n32)ccc1OC(F)F
Cc1cccc(C)c1OCC(=O)c1ccc2c(c1)N(CCCC(=O)NC[C@@H]1CCCO1)C(=O)CO2
COC[C@@H](C)NCCCc1nc2ccc(Cl)cc2[nH]1
Cc1ccc(O)c(Nc2c(Nc3ccccc3)c(=O)c2=O)c1
CC1C[C@H](C)N(C(=O)c2cc3n(n2)[C@H](C(F)(F)F)C[C@H](c2ccco2)N3)[C@H](C)C1
Cc1nc(N2CCCC2)c([N+](=O)[O-])n1CC(O)CN1CCN(c2cc3c(cc2F)c(=O)c(C(=O)O)cn3C2CC2)CC1
Cc1occc1C(=O)Nc1cccnc1
CN(C)Cc1cccc([C@H]2C[C@@H]2C(=O)Nc2nc3ccc(-c4cn[nH]c4)cc3s2)c1
CCC(=O)OCC#Cc1coc2cc(OC)ccc2c1=O
CCCOc1ccc([C@@H]2NC[C@H](c3cccc(OC)c3OC)c3c2[nH]c2ccccc32)cc1OC
Cc1cccc(C)c1NC(=O)CN(C)C(=O)CCc1ccc(S(=O)(=O)N2CCCCC2)cc1
Oc1ccc(O)c(C2=NN3[C@@H](C2)c2ccccc2O[C@@H]3c2cccnc2)c1
Fc1ccc(C2=NN3[C@H](C2)c2cc(Cl)ccc2OC32CCCC2)cc1
CCOCc1ccc(CNC(=O)c2cc(Cl)ccc2F)cc1
CCCCCCN(CCCCCC)CC(O)c1cc(-c2ccc(Cl)cc2)nc2c(Cl)cc(Cl)cc12
O=C(Cc1c(O)nc2ccccc2c1O)N(Cc1ccccc1)Cc1ccccc1
CCCC(=O)N1CCC(c2nccs2)CC1
COCC(C)n1c(SCC(=O)NNC(=O)c2ccc(F)cc2)nc2ccccc2c1=O
CCOC(=O)N1CCN(c2nc(C)nc3sc4c(c23)CCC4)CC1
Cn1nc(-c2cccs2)cc1C(=O)N1CC[C@@H](c2ccccc2C(=O)O)C1
CC1(N)CCN(c2c(F)cc3c(=O)c(C(=O)O)cn(C4CC4)c3c2F)C1
CN(C)S(=O)(=O)N(SC(F)(Cl)Cl)c1ccccc1
CC1CCN(c2ncnc(Oc3ccccc3F)c2N)CC1
COc1ccc(CCNC(=O)C2CCCN2C(=O)Nc2ccc(C)cc2)cc1OC
CCc1nccn1CCC(=O)N1CCCC(Nc2ccc(F)cc2)C1
C[C@@H](NC(=O)N1CCN(S(=O)(=O)c2ccc(Br)cc2)CC1)c1cccs1
CC(=O)O[C@H]1C[C@]2(O)C(COC(=O)C(OC(=O)CC(C)C)C(C)C)=CO[C@@H](OC(=O)CC(C)C)[C@@H]2[C@@]12CO2
COc1ccc(C(=O)N[C@@H]2CCCc3cn(C(C)C)nc32)nn1
CN[C@H](c1ccccc1)[C@@H](NC(=O)OC(C)(C)C)C(C)C
O=C1OCc2ccc(NC(=O)c3sccc3Cl)cc21
Cc1ccc(S(=O)(=O)N2CCCCC2)cc1NC(=O)/C=C\c1ccccc1
CCOc1cc(S(=O)(=O)N2CCN=C2c2ccccc2)ccc1F
CCCc1nnc2n1N[C@@H](c1ccc(F)cc1)[C@@H](C(=O)Nc1ccc(C)cc1)S2
CSc1ccc(/C=C2/SC(=O)N(Cc3ccc(Cl)cc3)C2=O)cc1
COc1cc(C(=O)c2ccccc2O)cc(OC)c1OC
C/C(=N/N=C(/S)N/N=C(\S)c1ccc(Cl)cc1)C12CC3CC(CC(C3)C1)C2
COc1ccc([C@H]2C[C@](O)(c3ccccc3)[C@H]3C(=O)Nc4ccccc4C(=O)[C@H]23)cc1
O=C(Cn1cnc2scc(-c3ccc(F)cc3)c2c1=O)N1CCc2ccccc2C1
Cc1ccccc1C(=O)N1C[C@@H]2CNC[C@@H](C2)C1
COc1ccc(CNC(=O)c2scc(-c3ccc(F)cc3)c2-n2cccc2)cc1
O=C(C1=C(O)/C(=C/c2ccc(Cl)cc2)CCC1)c1ccccc1
COc1ccc(S(=O)(=O)N[C@@H](C)c2ccc3c(c2)CCCC3)c(C)c1C
COc1cc(/C=C2/C(=O)N(C3CCCCC3)C(=S)N2C)cc(Br)c1OCc1ccccc1F
O=C(NC1C[C@H]2CC[C@H](C1)N2Cc1ccc2cc(F)ccc2c1)N1CCC(n2c(=O)[nH]c3ccccc32)CC1
Cn1cnnc1SCC(=O)Nc1ccc(F)cc1[N+](=O)[O-]
Cc1ncc([N+](=O)[O-])n1CCOC(=O)c1cccc(F)c1
COc1cccc(OCc2ccc(CCC(=O)O)c(C(=O)NC(CC(C)C)c3cc(C)cc(C)c3)c2)c1
[truncated: 110,013 more chars]
